# Supplementary material for: Mutations in SARS-CoV-2 structural proteins: a global analysis
Source: Virol J. 2022 Dec 18;19:220. doi: 10.1186/s12985-022-01951-7 (PMC9759450; doi:10.1186/s12985-022-01951-7)
Supplement: Supplementary file 1 — Additional file 1: Mutation’s features of the E protein and the attributed frequencies among six continents and globally. [file 12985_2022_1951_MOESM1_ESM.xlsx]

## Sheet: Total
	A	R	N	D	C	E	Q	G	H	I	L	K	M	F	P	S	T	Y	V
T(9)	1.2198e-05	1.87662e-06	0	0	0	1.56385e-07	0	4.69154e-07	0	0.0128536	0	3.1277e-07	0	0	0	3.59685e-06	0	0	1.56385e-07
P(71)	7.81924e-07	4.94176e-05	1.56385e-07	0	0	0	0	0	6.86529e-05	0	0.00688562	0	0	0	0	0.000784895	1.79843e-05	1.56385e-07	3.28408e-06
V(62)	1.56385e-06	0	0	1.56385e-07	0	0	0	0	0	3.34664e-05	1.90789e-05	4.69154e-07	0	0.00267684	0	1.56385e-07	0	0	0
L(21)	6.25539e-07	0	0	0	0	0	0	0	0	0.000104152	0	0	0	0.00175088	2.65854e-06	1.56385e-07	0	0	0.000370163
V(58)	1.72023e-06	0	0	0	0	0	0	4.69154e-07	0	9.00777e-05	8.11637e-05	0	0	0.00137149	0	3.1277e-07	0	4.69154e-07	0
L(73)	0	3.28408e-06	0	1.56385e-07	0	0	0	0	1.68896e-05	2.89312e-05	0	0	0	0.00117242	1.57949e-05	0	0	0	1.00086e-05
S(68)	2.58035e-05	0	1.56385e-07	0	2.37705e-05	0	0	0	0	0	0	0	0	0.000919699	5.88007e-05	0	6.25539e-07	3.19025e-05	3.1277e-07
S(55)	9.38309e-07	0	1.56385e-07	0	7.42828e-05	0	0	0	0	0	7.81924e-07	1.56385e-07	0	0.000728753	1.09469e-06	0	0	7.35009e-06	0
V(49)	6.72455e-06	0	0	0	0	6.25539e-07	0	3.1277e-07	0	0	0.0004715	0	2.42396e-05	0	0	4.69154e-07	0	0	0
A(41)	0	1.56385e-07	0	0	0	1.40746e-06	0	1.56385e-07	0	0	1.56385e-07	0	0	0	1.56385e-07	0.00010728	1.14161e-05	4.69154e-07	0.000342639
V(24)	5.39528e-05	0	0	0	0	0	0	4.69154e-07	0	1.56385e-07	0.00011854	0	0.000281336	1.56385e-07	0	0	0	0	0
D(72)	2.42396e-05	0	3.36227e-05	0	3.1277e-07	6.72455e-06	0	0.000203613	5.31708e-06	0	0	0	0	0	0	0	0	0.000156385	1.6264e-05
R(69)	0	0	0	0	0	0	0	0.000137149	0	0.000154821	0	1.84534e-05	0	0	0	6.30231e-05	5.1607e-06	0	0
T(30)	7.44392e-05	4.69154e-07	1.56385e-07	0	0	0	0	2.033e-06	0	0.000145282	1.25108e-06	3.1277e-07	1.56385e-07	0	0	1.40746e-06	0	0	1.56385e-07
V(5)	4.37878e-06	0	0	0	0	0	0	0	4.69154e-07	0.000183909	1.09469e-05	0	0	1.79843e-05	0	6.25539e-07	0	0	0
V(52)	3.1277e-07	1.56385e-07	0	0	0	3.1277e-07	0	1.56385e-07	0	5.06687e-05	0.000146533	4.69154e-07	0	0	0	4.69154e-07	0	0	0
V(70)	1.09469e-05	0	0	3.1277e-07	0	0	0	1.87662e-06	0	0.000117132	2.97131e-06	0	0	6.06773e-05	0	6.25539e-07	0	0	0
N(66)	0	0	0	3.1277e-06	0	0	0	0	3.59685e-06	5.47347e-06	0	0.000106185	0	0	0	2.20503e-05	1.03214e-05	3.14334e-05	0
E(8)	1.40746e-06	0	0	0.000122918	0	0	7.81924e-07	1.81406e-05	0	0	0	1.15725e-05	0	0	0	1.56385e-07	4.69154e-07	0	1.09469e-06
R(61)	0	0	0	0	2.20503e-05	0	0	1.56385e-07	7.41264e-05	0	4.98868e-05	0	0	0	4.69154e-07	6.25539e-07	0	1.56385e-07	7.81924e-07
F(20)	0	0	0	0	1.09469e-06	0	0	0	0	1.47002e-05	0.000112128	0	0	0	0	4.37878e-06	0	0	6.25539e-07
L(51)	0	0	0	0	0	0	0	0	0	6.61508e-05	0	0	0	6.42742e-05	3.1277e-07	1.56385e-07	0	0	7.81924e-07
C(43)	1.56385e-07	7.81924e-07	0	0	0	0	0	0	0	0	0	0	0	0.000126828	0	7.81924e-07	0	9.38309e-07	1.56385e-07
S(67)	2.81493e-06	0	0	0	1.72023e-06	0	0	0	0	0	1.56385e-07	0	0	8.24148e-05	3.44047e-05	0	7.81924e-07	2.81493e-06	0
S(16)	0	1.56385e-07	4.37878e-05	0	6.41178e-06	0	0	3.98781e-05	0	2.56471e-05	0	0	0	0	0	0	4.84793e-06	0	6.25539e-07
F(26)	1.56385e-07	1.56385e-07	0	3.1277e-07	2.033e-06	0	0	0	0	5.47347e-06	0.000100868	1.56385e-07	0	0	0	8.60117e-06	1.56385e-07	4.69154e-07	1.87662e-06
L(19)	0	1.56385e-07	0	0	0	0	0	0	0	1.95481e-05	0	0	0	5.31708e-05	3.28408e-06	1.56385e-07	0	0	3.86271e-05
V(75)	7.35009e-06	0	0	1.56385e-07	0	0	0	1.56385e-07	0	2.47088e-05	5.41092e-05	0	0	5.47347e-06	0	0	0	0	0
K(53)	0	8.6168e-05	7.81924e-07	0	0	1.56385e-07	1.25108e-06	0	0	7.81924e-07	1.56385e-07	0	0	0	4.69154e-07	0	4.69154e-07	0	1.56385e-07
N(64)	0	0	0	9.38309e-07	0	0	0	0	1.09469e-06	6.25539e-07	4.69154e-07	5.47347e-06	0	0	0	5.59858e-05	7.1937e-06	2.033e-06	1.56385e-07
I(46)	0	0	0	0	1.56385e-07	0	0	0	0	0	4.69154e-07	0	3.28408e-06	7.81924e-07	0	3.1277e-07	0	0	6.70891e-05
L(74)	0	3.1277e-07	0	0	0	0	6.41178e-06	0	1.56385e-07	0	0	0	2.61163e-05	3.1277e-07	2.73673e-05	0	0	0	1.06342e-05
S(50)	0	0	3.1277e-07	0	1.06342e-05	0	0	2.20503e-05	0	3.47174e-05	4.69154e-07	0	0	0	0	0	9.38309e-07	1.56385e-07	0
C(44)	0	1.56385e-06	4.69154e-07	0	0	0	0	1.09469e-06	0	0	0	1.56385e-07	0	5.06687e-05	0	1.56385e-06	0	7.35009e-06	0
G(10)	4.69154e-07	4.69154e-06	0	1.56385e-07	3.61249e-05	1.56385e-07	0	0	0	0	0	0	0	0	0	1.48566e-05	4.69154e-07	0	5.1607e-06
I(13)	0	1.56385e-07	0	0	0	0	0	0	0	0	1.8297e-05	0	6.56816e-06	0	0	0	1.56385e-07	0	3.51866e-05
A(22)	0	0	0	0	1.56385e-07	0	0	1.56385e-07	0	0	1.56385e-07	0	0	7.81924e-07	4.69154e-07	2.07992e-05	3.75324e-06	0	3.1277e-05
F(23)	0	0	0	0	5.00431e-06	0	0	0	0	2.81493e-06	4.19111e-05	0	0	0	0	1.25108e-06	0	0	1.56385e-06
F(4)	0	0	0	0	0	0	0	0	0	4.69154e-07	5.03559e-05	0	0	0	0	4.69154e-07	0	3.1277e-07	9.38309e-07
L(37)	0	1.25108e-06	0	0	1.56385e-07	0	0	0	7.81924e-07	7.81924e-07	0	0	0	4.80101e-05	4.69154e-07	0	3.1277e-07	0	0
S(3)	7.81924e-07	0	0	0	0	0	0	0	0	0	3.08078e-05	0	0	0	1.92353e-05	0	7.81924e-07	0	0
I(33)	0	0	0	0	0	0	0	0	0	0	6.25539e-07	0	0	1.25108e-06	0	3.1277e-07	4.61335e-05	1.56385e-07	4.69154e-07
E(7)	9.38309e-07	0	0	9.22671e-06	0	0	7.81924e-07	1.09469e-06	0	0	0	3.19025e-05	0	0	0	0	0	0	1.87662e-06
V(14)	1.25108e-05	0	4.69154e-07	1.56385e-07	0	0	0	1.56385e-07	0	1.70459e-05	4.69154e-06	0	0	8.13201e-06	0	0	1.56385e-07	0	0
L(18)	0	4.69154e-07	0	0	0	0	0	0	1.56385e-07	6.72455e-06	0	0	0	2.25194e-05	7.81924e-07	1.56385e-07	0	0	1.15725e-05
A(36)	0	0	1.56385e-07	0	0	0	0	0	0	1.56385e-07	7.81924e-07	0	1.56385e-07	0	1.56385e-07	2.34577e-06	9.85224e-06	0	2.79929e-05
T(11)	2.26758e-05	3.1277e-07	0	0	0	0	0	0	0	0	6.25539e-07	1.56385e-07	1.07906e-05	0	0	6.25539e-07	0	0	0
L(27)	1.56385e-07	6.25539e-07	0	0	0	0	0	3.1277e-07	0	0	0	0	3.1277e-07	2.15811e-05	0	6.25539e-06	0	0	3.1277e-07
V(47)	3.1277e-07	0	6.25539e-07	1.56385e-07	1.56385e-07	0	0	1.56385e-07	0	1.40746e-06	5.62985e-06	0	0	1.86098e-05	0	0	0	0	0
S(60)	1.09469e-05	4.69154e-07	1.56385e-07	0	0	0	0	0	0	0	1.56385e-07	0	0	1.25108e-06	3.1277e-07	0	5.47347e-06	7.66286e-06	1.56385e-07
S(6)	2.033e-06	0	0	0	0	4.69154e-07	0	0	0	0	7.03732e-06	0	0	1.56385e-07	5.31708e-06	0	9.38309e-06	0	0
F(56)	0	0	0	0	7.81924e-07	0	0	0	0	7.81924e-07	1.73587e-05	0	0	0	3.1277e-07	3.75324e-06	0	9.38309e-07	1.56385e-07
Y(42)	0	0	3.1277e-07	0	5.62985e-06	0	0	0	5.78624e-06	0	1.56385e-07	0	0	2.033e-06	0	1.56385e-07	1.56385e-07	0	1.56385e-07
C(40)	4.69154e-07	3.1277e-07	0	0	0	0	0	1.09469e-06	0	0	1.56385e-07	0	0	1.14161e-05	0	3.1277e-07	0	1.56385e-07	1.56385e-07
A(32)	0	0	0	3.1277e-07	0	1.56385e-07	0	0	0	4.69154e-07	0	0	0	0	1.56385e-07	1.09469e-06	1.87662e-06	0	9.69586e-06
L(65)	0	1.56385e-06	4.69154e-07	0	0	0	1.40746e-06	0	0	0	0	1.56385e-07	7.81924e-06	0	2.34577e-06	0	0	0	0
V(25)	9.38309e-06	0	0	0	0	0	0	1.56385e-07	0	1.40746e-06	1.72023e-06	0	0	7.81924e-07	0	0	0	0	0
N(45)	0	0	0	4.84793e-06	1.56385e-07	0	0	0	0	1.09469e-06	0	9.38309e-07	0	0	1.56385e-07	1.72023e-06	9.38309e-07	3.1277e-06	0
K(63)	0	8.75755e-06	1.87662e-06	0	0	4.69154e-07	1.56385e-07	1.56385e-07	0	4.69154e-07	0	0	0	0	0	0	0	0	0
V(29)	3.90962e-06	1.56385e-07	0	0	1.56385e-07	0	0	7.81924e-07	0	1.87662e-06	4.69154e-07	0	0	3.75324e-06	0	0	4.69154e-07	0	0
N(48)	0	0	0	1.87662e-06	0	0	0	0	1.56385e-07	3.1277e-07	0	1.40746e-06	0	0	1.56385e-07	4.37878e-06	4.69154e-07	1.87662e-06	4.69154e-07
P(54)	0	1.56385e-07	0	0	0	0	0	0	3.1277e-07	0	4.53516e-06	1.56385e-07	0	0	0	4.53516e-06	6.25539e-07	0	1.56385e-07
Y(57)	0	0	3.1277e-07	0	1.56385e-07	0	0	0	4.69154e-07	0	0	0	0	7.35009e-06	0	3.1277e-07	1.56385e-07	0	4.69154e-07
V(17)	3.59685e-06	0	1.56385e-07	0	0	1.56385e-07	0	0	0	1.56385e-06	2.50216e-06	0	0	0	0	0	0	0	0
L(34)	7.81924e-07	1.56385e-07	0	0	1.56385e-07	0	0	0	4.69154e-07	1.56385e-07	0	0	0	2.34577e-06	3.1277e-06	0	4.69154e-07	0	0
L(28)	0	1.56385e-07	0	0	0	0	1.56385e-07	0	0	2.81493e-06	0	0	0	3.1277e-07	1.40746e-06	0	0	0	2.34577e-06
Y(59)	0	0	0	0	3.44047e-06	0	0	0	1.56385e-06	0	0	0	0	4.69154e-07	0	9.38309e-07	1.56385e-07	0	0
L(12)	0	0	0	0	0	0	0	1.56385e-07	0	6.25539e-07	0	0	0	3.1277e-06	0	3.1277e-07	0	0	3.1277e-07
L(31)	4.69154e-07	6.25539e-07	0	0	1.56385e-07	0	4.69154e-07	0	0	1.25108e-06	0	0	0	0	9.38309e-07	0	0	0	6.25539e-07
Y(2)	0	0	1.56385e-07	1.56385e-07	1.56385e-07	0	0	0	3.75324e-06	0	0	0	0	1.56385e-07	0	0	0	0	0
T(35)	2.50216e-06	1.56385e-07	3.1277e-07	0	1.56385e-07	0	0	0	0	7.81924e-07	0	0	0	0	1.56385e-07	1.56385e-07	0	0	0
N(15)	0	0	0	1.40746e-06	0	0	0	0	1.56385e-07	3.1277e-07	0	0	0	0	0	1.40746e-06	1.56385e-07	4.69154e-07	0
R(38)	1.56385e-07	0	0	0	0	0	1.09469e-06	3.1277e-07	0	0	1.09469e-06	0	0	0	3.1277e-07	0	3.1277e-07	0	1.56385e-07
L(39)	0	0	1.56385e-07	0	4.69154e-07	0	0	0	0	0	0	0	4.69154e-07	7.81924e-07	0	6.25539e-07	0	0	3.1277e-07
M(1)	0	0	0	0	0	0	0	0	0	9.38309e-07	1.56385e-07	6.25539e-07	0	0	0	0	1.56385e-07	0	0

## Sheet: Africa
	A	R	N	D	C	Q	G	H	I	L	K	M	F	P	S	T	Y	V
P(71)	0	2.71791e-05	0	0	0	0	0	0	0	0.164379	0	0	0	0	0.000244612	0	0	0
L(21)	0	0	0	0	0	0	0	0	0.00059794	0	0	0	0.0244612	0	0	0	0	0
T(9)	0	0	0	0	0	0	0	0	0.0202212	0	0	0	0	0	0	0	0	0
D(72)	0	0	0	0	0	0	2.71791e-05	0	0	0	0	0	0	0	0	0	0.00326149	0
V(58)	0	0	0	0	0	0	0	0	0.000380507	0.000163074	0	0	0.00160357	0	0	0	0	0
S(68)	0	0	0	0	2.71791e-05	0	0	0	0	0	0	0	0.00119588	0.000108716	0	0	2.71791e-05	0
V(5)	0	0	0	0	0	0	0	0	0.000135895	0	0	0	0.00103281	0	0	0	0	0
V(62)	0	0	0	0	0	0	0	0	2.71791e-05	0	0	0	0.00111434	0	0	0	0	0
L(73)	0	8.15372e-05	0	0	0	0	0	0	0	0	0	0	0.000679477	2.71791e-05	0	0	0	0
S(55)	0	0	0	0	0	0	0	0	0	0	0	0	0.000489223	0	0	0	0	0
S(16)	0	0	2.71791e-05	0	2.71791e-05	0	0.000271791	0	2.71791e-05	0	0	0	0	0	0	0	0	0
F(20)	0	0	0	0	0	0	0	0	0.000135895	0.000163074	0	0	0	0	0	0	0	0
V(49)	0	0	0	0	0	0	0	0	0	0.00029897	0	0	0	0	0	0	0	0
R(69)	0	0	0	0	0	0	0	0	0.000217433	0	2.71791e-05	0	0	0	2.71791e-05	0	0	0
C(43)	0	0	0	0	0	0	0	0	0	0	0	0	0.000244612	0	0	0	0	0
A(41)	0	0	0	0	0	0	0	0	0	0	0	0	0	0	8.15372e-05	0	0	0.000163074
V(24)	2.71791e-05	0	0	0	0	0	0	0	0	5.43582e-05	0	0.000108716	0	0	0	0	0	0
G(10)	0	0	0	0	0.000108716	0	0	0	0	0	0	0	0	0	0	0	0	2.71791e-05
K(53)	0	8.15372e-05	0	0	0	2.71791e-05	0	0	0	0	0	0	0	0	0	0	0	0
F(26)	0	0	0	0	0	0	0	0	0	0.000108716	0	0	0	0	0	0	0	0
L(74)	0	0	0	0	0	0	0	0	0	0	0	0	0	5.43582e-05	0	0	0	5.43582e-05
I(33)	0	0	0	0	0	0	0	0	0	0	0	0	0	0	0	0.000108716	0	0
N(66)	0	0	0	0	0	0	0	0	0	0	0.000108716	0	0	0	0	0	0	0
V(52)	0	0	0	0	0	0	0	0	2.71791e-05	5.43582e-05	0	0	0	0	0	0	0	0
L(18)	0	2.71791e-05	0	0	0	0	0	0	0	0	0	0	5.43582e-05	0	0	0	0	0
L(19)	0	0	0	0	0	0	0	0	0	0	0	0	2.71791e-05	2.71791e-05	0	0	0	2.71791e-05
T(30)	0	0	0	0	0	0	0	0	8.15372e-05	0	0	0	0	0	0	0	0	0
E(8)	0	0	0	8.15372e-05	0	0	0	0	0	0	0	0	0	0	0	0	0	0
C(40)	0	0	0	0	0	0	5.43582e-05	0	0	0	0	0	0	0	0	0	0	0
L(27)	0	0	0	0	0	0	0	0	0	0	0	0	2.71791e-05	0	2.71791e-05	0	0	0
A(22)	0	0	0	0	0	0	0	0	0	0	0	0	0	0	0	0	0	5.43582e-05
V(75)	0	0	0	0	0	0	0	0	0	2.71791e-05	0	0	2.71791e-05	0	0	0	0	0
S(50)	0	0	0	0	0	0	5.43582e-05	0	0	0	0	0	0	0	0	0	0	0
R(61)	0	0	0	0	2.71791e-05	0	0	2.71791e-05	0	0	0	0	0	0	0	0	0	0
L(65)	0	0	0	0	0	0	0	0	0	0	0	0	0	5.43582e-05	0	0	0	0
L(34)	0	0	0	0	0	0	0	0	0	0	0	0	2.71791e-05	0	0	0	0	0
S(67)	0	0	0	0	0	0	0	0	0	0	0	0	0	0	0	0	2.71791e-05	0
F(23)	0	0	0	0	2.71791e-05	0	0	0	0	0	0	0	0	0	0	0	0	0
V(29)	2.71791e-05	0	0	0	0	0	0	0	0	0	0	0	0	0	0	0	0	0
S(3)	0	0	0	0	0	0	0	0	0	2.71791e-05	0	0	0	0	0	0	0	0
T(11)	2.71791e-05	0	0	0	0	0	0	0	0	0	0	0	0	0	0	0	0	0
K(63)	0	2.71791e-05	0	0	0	0	0	0	0	0	0	0	0	0	0	0	0	0
N(64)	0	0	0	2.71791e-05	0	0	0	0	0	0	0	0	0	0	0	0	0	0
T(35)	2.71791e-05	0	0	0	0	0	0	0	0	0	0	0	0	0	0	0	0	0
A(36)	0	0	0	0	0	0	0	0	0	0	0	0	0	0	0	0	0	2.71791e-05
I(13)	0	0	0	0	0	0	0	0	0	0	0	0	0	0	0	0	0	2.71791e-05
P(54)	0	0	0	0	0	0	0	0	0	2.71791e-05	0	0	0	0	0	0	0	0
V(70)	0	0	0	2.71791e-05	0	0	0	0	0	0	0	0	0	0	0	0	0	0
L(51)	0	0	0	0	0	0	0	0	0	0	0	0	2.71791e-05	0	0	0	0	0
S(6)	0	0	0	0	0	0	0	0	0	0	0	0	0	0	0	0	0	0
N(15)	0	0	0	0	0	0	0	0	0	0	0	0	0	0	0	0	0	0
V(17)	0	0	0	0	0	0	0	0	0	0	0	0	0	0	0	0	0	0
Y(2)	0	0	0	0	0	0	0	0	0	0	0	0	0	0	0	0	0	0
V(14)	0	0	0	0	0	0	0	0	0	0	0	0	0	0	0	0	0	0
F(4)	0	0	0	0	0	0	0	0	0	0	0	0	0	0	0	0	0	0
L(12)	0	0	0	0	0	0	0	0	0	0	0	0	0	0	0	0	0	0
E(7)	0	0	0	0	0	0	0	0	0	0	0	0	0	0	0	0	0	0
R(38)	0	0	0	0	0	0	0	0	0	0	0	0	0	0	0	0	0	0
V(25)	0	0	0	0	0	0	0	0	0	0	0	0	0	0	0	0	0	0
I(46)	0	0	0	0	0	0	0	0	0	0	0	0	0	0	0	0	0	0
S(60)	0	0	0	0	0	0	0	0	0	0	0	0	0	0	0	0	0	0
Y(59)	0	0	0	0	0	0	0	0	0	0	0	0	0	0	0	0	0	0
Y(57)	0	0	0	0	0	0	0	0	0	0	0	0	0	0	0	0	0	0
F(56)	0	0	0	0	0	0	0	0	0	0	0	0	0	0	0	0	0	0
N(48)	0	0	0	0	0	0	0	0	0	0	0	0	0	0	0	0	0	0
V(47)	0	0	0	0	0	0	0	0	0	0	0	0	0	0	0	0	0	0
N(45)	0	0	0	0	0	0	0	0	0	0	0	0	0	0	0	0	0	0
L(28)	0	0	0	0	0	0	0	0	0	0	0	0	0	0	0	0	0	0
C(44)	0	0	0	0	0	0	0	0	0	0	0	0	0	0	0	0	0	0
Y(42)	0	0	0	0	0	0	0	0	0	0	0	0	0	0	0	0	0	0
L(39)	0	0	0	0	0	0	0	0	0	0	0	0	0	0	0	0	0	0
L(37)	0	0	0	0	0	0	0	0	0	0	0	0	0	0	0	0	0	0
A(32)	0	0	0	0	0	0	0	0	0	0	0	0	0	0	0	0	0	0
L(31)	0	0	0	0	0	0	0	0	0	0	0	0	0	0	0	0	0	0
M(1)	0	0	0	0	0	0	0	0	0	0	0	0	0	0	0	0	0	0

## Sheet: Asia
	A	R	N	D	C	E	G	H	I	L	K	M	F	P	S	T	Y	V
P(71)	0	4.90094e-05	2.13084e-06	0	0	0	0	2.98318e-05	0	0.0146772	0	0	0	0	0.000170467	6.39253e-06	0	0
V(62)	0	0	0	2.13084e-06	0	0	0	0	6.17944e-05	2.13084e-05	6.39253e-06	0	0.0118944	0	2.13084e-06	0	0	0
T(9)	5.11402e-05	2.13084e-06	0	0	0	2.13084e-06	6.39253e-06	0	0.00544217	0	2.13084e-06	0	0	0	6.39253e-06	0	0	0
L(21)	6.39253e-06	0	0	0	0	0	0	0	4.26168e-06	0	0	0	0.00206052	0	0	0	0	4.26168e-06
L(73)	0	0	0	0	0	0	0	2.13084e-06	0.000157682	0	0	0	0.000914131	1.27851e-05	0	0	0	4.26168e-06
S(68)	3.40935e-05	0	2.13084e-06	0	2.77009e-05	0	0	0	0	0	0	0	0.000892823	9.37571e-05	0	0	1.70467e-05	0
S(55)	0	0	2.13084e-06	0	8.52337e-06	0	0	0	0	2.13084e-06	2.13084e-06	0	0.000639253	6.39253e-06	0	0	1.70467e-05	0
V(24)	0.000421907	0	0	0	0	0	0	0	0	5.11402e-05	0	0.000168337	0	0	0	0	0	0
V(58)	4.26168e-06	0	0	0	0	0	0	0	7.03178e-05	4.26168e-05	0	0	0.00050501	0	4.26168e-06	0	6.39253e-06	0
A(41)	0	2.13084e-06	0	0	0	6.39253e-06	0	0	0	2.13084e-06	0	0	0	0	8.94954e-05	0	6.39253e-06	0.000438954
V(49)	2.13084e-06	0	0	0	0	0	0	0	0	0.000466654	0	2.13084e-06	0	0	6.39253e-06	0	0	0
D(72)	6.60561e-05	0	3.62243e-05	0	0	1.27851e-05	0.000153421	2.13084e-06	0	0	0	0	0	0	0	0	0.000159813	1.27851e-05
R(61)	0	0	0	0	8.52337e-05	0	0	6.39253e-05	0	8.52337e-05	0	0	0	0	2.13084e-06	0	2.13084e-06	8.52337e-06
F(26)	2.13084e-06	2.13084e-06	0	4.26168e-06	1.27851e-05	0	0	0	2.13084e-06	0.000132112	2.13084e-06	0	0	0	3.40935e-05	2.13084e-06	4.26168e-06	4.26168e-06
R(69)	0	0	0	0	0	0	2.13084e-06	0	9.16262e-05	0	4.26168e-05	0	0	0	2.55701e-05	2.77009e-05	0	0
E(8)	0	0	0	0.000117196	0	0	6.39253e-06	0	0	0	5.11402e-05	0	0	0	2.13084e-06	6.39253e-06	0	0
T(30)	1.49159e-05	4.26168e-06	0	0	0	0	0	0	0.000147028	1.06542e-05	0	2.13084e-06	0	0	0	0	0	0
S(16)	0	2.13084e-06	2.77009e-05	0	4.26168e-06	0	0.000121458	0	8.52337e-06	0	0	0	0	0	0	2.13084e-06	0	8.52337e-06
V(70)	3.40935e-05	0	0	2.13084e-06	0	0	0	0	5.54019e-05	4.26168e-06	0	0	6.60561e-05	0	2.13084e-06	0	0	0
L(19)	0	0	0	0	0	0	0	0	0.00010228	0	0	0	4.90094e-05	8.52337e-06	0	0	0	2.13084e-06
S(50)	0	0	2.13084e-06	0	2.13084e-06	0	1.91776e-05	0	0.000121458	6.39253e-06	0	0	0	0	0	0	2.13084e-06	0
V(5)	1.06542e-05	0	0	0	0	0	0	0	0.000108673	4.26168e-06	0	0	1.06542e-05	0	6.39253e-06	0	0	0
N(66)	0	0	0	2.13084e-06	0	0	0	2.13084e-06	0	0	1.91776e-05	0	0	0	2.98318e-05	6.60561e-05	1.06542e-05	0
C(43)	2.13084e-06	2.13084e-06	0	0	0	0	0	0	0	0	0	0	0.000112935	0	0	0	4.26168e-06	2.13084e-06
V(75)	2.13084e-06	0	0	0	0	0	0	0	1.49159e-05	6.17944e-05	0	0	3.62243e-05	0	0	0	0	0
V(47)	2.13084e-06	0	8.52337e-06	2.13084e-06	2.13084e-06	0	0	0	0	2.55701e-05	0	0	6.60561e-05	0	0	0	0	0
L(74)	0	0	0	0	0	0	0	0	0	0	0	5.96636e-05	2.13084e-06	1.49159e-05	0	0	0	1.91776e-05
S(6)	2.13084e-06	0	0	0	0	6.39253e-06	0	0	0	1.49159e-05	0	0	0	2.13084e-06	0	5.75327e-05	0	0
I(46)	0	0	0	0	2.13084e-06	0	0	0	0	6.39253e-06	0	4.26168e-05	2.13084e-06	0	2.13084e-06	0	0	2.55701e-05
G(10)	0	4.26168e-06	0	2.13084e-06	3.19626e-05	2.13084e-06	0	0	0	0	0	0	0	0	1.27851e-05	6.39253e-06	0	1.27851e-05
L(37)	0	6.39253e-06	0	0	0	0	0	0	2.13084e-06	0	0	0	5.54019e-05	0	0	2.13084e-06	0	0
L(51)	0	0	0	0	0	0	0	0	2.13084e-05	0	0	0	3.19626e-05	0	2.13084e-06	0	0	1.06542e-05
F(20)	0	0	0	0	6.39253e-06	0	0	0	4.26168e-06	5.54019e-05	0	0	0	0	0	0	0	0
L(27)	2.13084e-06	8.52337e-06	0	0	0	0	4.26168e-06	0	0	0	0	2.13084e-06	2.98318e-05	0	1.27851e-05	0	0	4.26168e-06
V(52)	0	2.13084e-06	0	0	0	0	0	0	3.19626e-05	1.70467e-05	6.39253e-06	0	0	0	2.13084e-06	0	0	0
E(7)	2.13084e-06	0	0	8.52337e-06	0	0	0	0	0	0	4.47477e-05	0	0	0	0	0	0	2.13084e-06
L(34)	1.06542e-05	0	0	0	2.13084e-06	0	0	0	0	0	0	0	0	3.62243e-05	0	6.39253e-06	0	0
I(33)	0	0	0	0	0	0	0	0	0	8.52337e-06	0	0	0	0	0	4.47477e-05	2.13084e-06	0
I(13)	0	0	0	0	0	0	0	0	0	0	0	1.49159e-05	0	0	0	2.13084e-06	0	3.83552e-05
N(64)	0	0	0	0	0	0	0	0	0	6.39253e-06	1.49159e-05	0	0	0	1.91776e-05	6.39253e-06	0	2.13084e-06
S(67)	4.26168e-06	0	0	0	0	0	0	0	0	2.13084e-06	0	0	2.55701e-05	8.52337e-06	0	6.39253e-06	2.13084e-06	0
A(22)	0	0	0	0	0	0	0	0	0	0	0	0	8.52337e-06	0	1.49159e-05	2.13084e-06	0	2.13084e-05
A(36)	0	0	2.13084e-06	0	0	0	0	0	0	8.52337e-06	0	2.13084e-06	0	0	2.13084e-06	8.52337e-06	0	1.49159e-05
V(14)	8.52337e-06	0	6.39253e-06	2.13084e-06	0	0	2.13084e-06	0	8.52337e-06	4.26168e-06	0	0	6.39253e-06	0	0	0	0	0
C(44)	0	2.13084e-06	6.39253e-06	0	0	0	4.26168e-06	0	0	0	2.13084e-06	0	1.06542e-05	0	2.13084e-06	0	1.06542e-05	0
F(23)	0	0	0	0	4.26168e-06	0	0	0	0	1.91776e-05	0	0	0	0	2.13084e-06	0	0	1.27851e-05
S(60)	2.13084e-06	6.39253e-06	0	0	0	0	0	0	0	0	0	0	2.13084e-06	2.13084e-06	0	6.39253e-06	1.49159e-05	2.13084e-06
T(11)	2.13084e-05	0	0	0	0	0	0	0	0	6.39253e-06	0	6.39253e-06	0	0	0	0	0	0
V(29)	2.13084e-06	2.13084e-06	0	0	2.13084e-06	0	1.06542e-05	0	4.26168e-06	2.13084e-06	0	0	2.13084e-06	0	0	6.39253e-06	0	0
F(4)	0	0	0	0	0	0	0	0	0	2.34393e-05	0	0	0	0	0	0	2.13084e-06	6.39253e-06
L(28)	0	2.13084e-06	0	0	0	0	0	0	2.13084e-06	0	0	0	2.13084e-06	4.26168e-06	0	0	0	1.91776e-05
S(3)	0	0	0	0	0	0	0	0	0	1.49159e-05	0	0	0	1.49159e-05	0	0	0	0
Y(42)	0	0	0	0	1.70467e-05	0	0	4.26168e-06	0	2.13084e-06	0	0	2.13084e-06	0	0	2.13084e-06	0	2.13084e-06
C(40)	6.39253e-06	2.13084e-06	0	0	0	0	2.13084e-06	0	0	2.13084e-06	0	0	1.06542e-05	0	0	0	0	2.13084e-06
P(54)	0	0	0	0	0	0	0	0	0	6.39253e-06	2.13084e-06	0	0	0	1.27851e-05	0	0	2.13084e-06
R(38)	2.13084e-06	0	0	0	0	0	0	0	0	1.06542e-05	0	0	0	2.13084e-06	0	4.26168e-06	0	2.13084e-06
A(32)	0	0	0	0	0	2.13084e-06	0	0	6.39253e-06	0	0	0	0	0	0	1.27851e-05	0	0
K(53)	0	6.39253e-06	0	0	0	0	0	0	0	2.13084e-06	0	0	0	6.39253e-06	0	2.13084e-06	0	2.13084e-06
F(56)	0	0	0	0	2.13084e-06	0	0	0	0	6.39253e-06	0	0	0	2.13084e-06	2.13084e-06	0	6.39253e-06	0
T(35)	1.27851e-05	2.13084e-06	0	0	2.13084e-06	0	0	0	2.13084e-06	0	0	0	0	0	0	0	0	0
V(25)	6.39253e-06	0	0	0	0	0	0	0	0	2.13084e-06	0	0	8.52337e-06	0	0	0	0	0
K(63)	0	4.26168e-06	1.27851e-05	0	0	0	0	0	0	0	0	0	0	0	0	0	0	0
L(39)	0	0	2.13084e-06	0	6.39253e-06	0	0	0	0	0	0	0	0	0	2.13084e-06	0	0	4.26168e-06
N(48)	0	0	0	2.13084e-06	0	0	0	0	2.13084e-06	0	0	0	0	2.13084e-06	0	0	2.13084e-06	6.39253e-06
Y(57)	0	0	2.13084e-06	0	0	0	0	2.13084e-06	0	0	0	0	0	0	4.26168e-06	0	0	6.39253e-06
N(45)	0	0	0	2.13084e-06	2.13084e-06	0	0	0	6.39253e-06	0	0	0	0	2.13084e-06	0	0	2.13084e-06	0
L(18)	0	0	0	0	0	0	0	0	2.13084e-06	0	0	0	4.26168e-06	6.39253e-06	2.13084e-06	0	0	0
L(31)	6.39253e-06	0	0	0	2.13084e-06	0	0	0	0	0	0	0	0	0	0	0	0	2.13084e-06
L(12)	0	0	0	0	0	0	2.13084e-06	0	6.39253e-06	0	0	0	2.13084e-06	0	0	0	0	2.13084e-06
Y(59)	0	0	0	0	0	0	0	0	0	0	0	0	2.13084e-06	0	1.06542e-05	0	0	0
L(65)	0	0	6.39253e-06	0	0	0	0	0	0	0	2.13084e-06	4.26168e-06	0	0	0	0	0	0
N(15)	0	0	0	0	0	0	0	0	2.13084e-06	0	0	0	0	0	8.52337e-06	0	0	0
V(17)	0	0	2.13084e-06	0	0	0	0	0	2.13084e-06	6.39253e-06	0	0	0	0	0	0	0	0
M(1)	0	0	0	0	0	0	0	0	0	2.13084e-06	0	0	0	0	0	0	0	0
Y(2)	0	0	0	0	0	0	0	0	0	0	0	0	0	0	0	0	0	0

## Sheet: Europe
	A	R	N	D	C	G	H	I	L	K	M	F	P	S	T	Y	V
T(9)	1.12214e-05	1.92366e-06	0	0	0	0	0	0.0187897	0	3.2061e-07	0	0	0	2.56488e-06	0	0	0
P(71)	0	3.33434e-05	0	0	0	0	7.69464e-05	0	0.00565139	0	0	0	0	0.00058351	1.98778e-05	0	6.09159e-06
V(58)	1.28244e-06	0	0	0	0	0	0	6.50838e-05	6.79693e-05	0	0	0.00199291	0	0	0	0	0
V(62)	1.60305e-06	0	0	0	0	0	0	2.59694e-05	2.91755e-05	0	0	0.00166332	0	0	0	0	0
L(21)	0	0	0	0	0	0	0	8.65647e-06	0	0	0	0.00136804	1.28244e-06	3.2061e-07	0	0	1.50687e-05
L(73)	0	6.4122e-07	0	3.2061e-07	0	0	3.27022e-05	9.6183e-06	0	0	0	0.00125134	1.21832e-05	0	0	0	8.97708e-06
S(55)	6.4122e-07	0	0	0	0.000138504	0	0	0	3.2061e-07	0	0	0.000975937	6.4122e-07	0	0	8.33586e-06	0
S(68)	4.23205e-05	0	0	0	2.69312e-05	0	0	0	0	0	0	0.000786136	6.38014e-05	0	9.6183e-07	3.75114e-05	6.4122e-07
V(24)	1.47481e-05	0	0	0	0	6.4122e-07	0	3.2061e-07	0.000141068	0	0.000349465	0	0	0	0	0	0
A(41)	0	0	0	0	0	0	0	0	0	0	0	0	3.2061e-07	0.000107084	2.01984e-05	0	0.000374793
R(69)	0	0	0	0	0	0.000200381	0	0.000165755	0	1.09007e-05	0	0	0	8.33586e-06	3.2061e-06	0	0
V(49)	4.48854e-06	0	0	0	0	6.4122e-07	0	0	0.000296885	0	3.33434e-05	0	0	0	0	0	0
T(30)	9.42593e-05	0	0	0	0	0	0	0.000168	3.2061e-07	3.2061e-07	0	0	0	1.60305e-06	0	0	3.2061e-07
D(72)	1.47481e-05	0	1.60305e-05	0	0	3.9435e-05	8.97708e-06	0	0	0	0	0	0	0	0	0.000148122	1.98778e-05
F(20)	0	0	0	0	1.28244e-06	0	0	1.21832e-05	0.000197496	0	0	0	0	4.80915e-06	0	0	9.6183e-07
V(5)	3.2061e-06	0	0	0	0	0	0	0.000180183	1.21832e-05	0	0	1.21832e-05	0	0	0	0	0
V(70)	9.6183e-06	0	0	0	0	0	0	0.000117343	6.4122e-07	0	0	7.40609e-05	0	3.2061e-07	0	0	0
E(8)	3.2061e-07	0	0	0.00015774	0	1.25038e-05	0	0	0	9.29769e-06	0	0	0	0	0	0	9.6183e-07
K(53)	0	0.00016287	0	0	0	0	0	3.2061e-07	0	0	0	0	0	0	6.4122e-07	0	0
N(66)	0	0	0	1.92366e-06	0	0	5.12976e-06	1.60305e-06	0	0.000108046	0	0	0	8.97708e-06	1.92366e-06	2.24427e-05	0
C(43)	0	3.2061e-07	0	0	0	0	0	0	0	0	0	0.000142351	0	9.6183e-07	0	9.6183e-07	0
L(19)	0	0	0	0	0	0	0	1.34656e-05	0	0	0	5.51449e-05	3.2061e-07	0	0	0	5.29007e-05
S(16)	0	0	5.93129e-05	0	1.12214e-05	5.45037e-06	0	3.97556e-05	0	0	0	0	0	0	6.4122e-07	0	0
R(61)	0	0	0	0	1.12214e-05	3.2061e-07	4.61678e-05	0	5.22594e-05	0	0	0	9.6183e-07	6.4122e-07	0	0	0
S(67)	2.56488e-06	0	0	0	3.2061e-07	0	0	0	0	0	0	3.75114e-05	5.258e-05	0	3.2061e-07	3.52671e-06	0
L(51)	0	0	0	0	0	0	0	2.0519e-05	0	0	0	7.5664e-05	0	0	0	0	0
I(13)	0	0	0	0	0	0	0	0	3.07786e-05	0	3.84732e-06	0	0	0	0	0	5.0977e-05
N(64)	0	0	0	6.4122e-07	0	0	9.6183e-07	9.6183e-07	0	6.73281e-06	0	0	0	5.77098e-05	4.48854e-06	3.2061e-06	0
F(26)	0	0	0	0	6.4122e-07	0	0	1.05801e-05	4.55266e-05	0	0	0	0	8.01525e-06	0	0	3.2061e-07
G(10)	6.4122e-07	6.09159e-06	0	0	4.13587e-05	0	0	0	0	0	0	0	0	1.21832e-05	0	0	3.84732e-06
S(3)	0	0	0	0	0	0	0	0	3.97556e-05	0	0	0	2.18015e-05	0	0	0	0
V(75)	6.73281e-06	0	0	3.2061e-07	0	0	0	2.53282e-05	2.43664e-05	0	0	2.88549e-06	0	0	0	0	0
V(52)	0	0	0	0	0	0	0	2.72519e-05	3.0458e-05	0	0	0	0	0	0	0	0
A(22)	0	0	0	0	0	3.2061e-07	0	0	0	0	0	0	3.2061e-07	2.08397e-05	5.77098e-06	0	3.01373e-05
S(50)	0	0	3.2061e-07	0	1.92366e-05	1.41068e-05	0	2.0519e-05	0	0	0	0	0	0	0	0	0
V(14)	1.76336e-05	0	0	0	0	0	0	2.14809e-05	4.16793e-06	0	0	8.65647e-06	0	0	3.2061e-07	0	0
L(37)	0	9.6183e-07	0	0	0	0	9.6183e-07	3.2061e-07	0	0	0	4.87327e-05	3.2061e-07	0	3.2061e-07	0	0
C(44)	0	1.28244e-06	0	0	0	1.28244e-06	0	0	0	0	0	3.97556e-05	0	1.60305e-06	0	7.37403e-06	0
L(74)	0	6.4122e-07	0	0	0	0	3.2061e-07	0	0	0	1.21832e-05	3.2061e-07	2.21221e-05	0	0	0	8.01525e-06
I(46)	0	0	0	0	0	0	0	0	0	0	0	0	0	3.2061e-07	0	0	4.61678e-05
F(23)	0	0	0	0	2.24427e-06	0	0	3.2061e-07	4.00763e-05	0	0	0	0	9.6183e-07	0	0	6.4122e-07
I(33)	0	0	0	0	0	0	0	0	0	0	0	9.6183e-07	0	6.4122e-07	3.75114e-05	0	6.4122e-07
A(36)	0	0	0	0	0	0	0	3.2061e-07	0	0	0	0	3.2061e-07	2.56488e-06	8.01525e-06	0	2.50076e-05
T(11)	2.08397e-05	0	0	0	0	0	0	0	0	3.2061e-07	1.02595e-05	0	0	9.6183e-07	0	0	0
E(7)	0	0	0	4.48854e-06	0	9.6183e-07	0	0	0	2.629e-05	0	0	0	0	0	0	3.2061e-07
L(18)	0	0	0	0	0	0	0	5.12976e-06	0	0	0	2.4687e-05	3.2061e-07	0	0	0	1.28244e-06
L(27)	0	0	0	0	0	0	0	0	0	0	3.2061e-07	1.92366e-05	0	7.05342e-06	0	0	0
F(4)	0	0	0	0	0	0	0	0	2.30839e-05	0	0	0	0	6.4122e-07	0	0	0
V(47)	3.2061e-07	0	0	0	0	0	0	1.28244e-06	3.84732e-06	0	0	1.57099e-05	0	0	0	0	0
F(56)	0	0	0	0	9.6183e-07	0	0	0	1.25038e-05	0	0	0	0	6.73281e-06	0	0	0
S(60)	3.84732e-06	0	0	0	0	0	0	0	0	0	0	6.4122e-07	0	0	6.4122e-06	7.69464e-06	0
S(6)	1.92366e-06	0	0	0	0	0	0	0	5.12976e-06	0	0	3.2061e-07	6.4122e-06	0	2.88549e-06	0	0
V(25)	1.3145e-05	0	0	0	0	0	0	1.92366e-06	6.4122e-07	0	0	0	0	0	0	0	0
Y(57)	0	0	0	0	0	0	6.4122e-07	0	0	0	0	1.44275e-05	0	0	0	0	0
A(32)	0	0	0	3.2061e-07	0	0	0	0	0	0	0	0	0	3.2061e-07	9.6183e-07	0	1.34656e-05
N(45)	0	0	0	6.4122e-06	0	0	0	3.2061e-07	0	6.4122e-07	0	0	0	1.28244e-06	6.4122e-07	5.45037e-06	0
C(40)	0	3.2061e-07	0	0	0	3.2061e-07	0	0	0	0	0	1.28244e-05	0	3.2061e-07	0	0	0
Y(42)	0	0	0	0	6.4122e-06	0	3.52671e-06	0	0	0	0	6.4122e-07	0	0	0	0	0
V(29)	3.52671e-06	0	0	0	0	0	0	0	0	0	0	4.80915e-06	0	0	0	0	0
V(17)	3.2061e-06	0	0	0	0	0	0	1.92366e-06	2.88549e-06	0	0	0	0	0	0	0	0
P(54)	0	0	0	0	0	0	3.2061e-07	0	4.48854e-06	0	0	0	0	2.88549e-06	3.2061e-07	0	0
N(48)	0	0	0	6.4122e-07	0	0	0	3.2061e-07	0	2.56488e-06	0	0	0	2.88549e-06	6.4122e-07	6.4122e-07	0
Y(2)	0	0	0	3.2061e-07	0	0	6.4122e-06	0	0	0	0	3.2061e-07	0	0	0	0	0
L(28)	0	0	0	0	0	0	0	3.84732e-06	0	0	0	0	1.28244e-06	0	0	0	3.2061e-07
L(65)	0	3.2061e-07	0	0	0	0	0	0	0	0	2.24427e-06	0	2.24427e-06	0	0	0	0
L(31)	0	9.6183e-07	0	0	0	0	0	1.92366e-06	0	0	0	0	6.4122e-07	0	0	0	9.6183e-07
K(63)	0	2.88549e-06	3.2061e-07	0	0	0	0	6.4122e-07	0	0	0	0	0	0	0	0	0
L(34)	0	3.2061e-07	0	0	0	0	9.6183e-07	0	0	0	0	1.60305e-06	3.2061e-07	0	0	0	0
L(39)	0	0	0	0	0	0	0	0	0	0	9.6183e-07	9.6183e-07	0	3.2061e-07	0	0	0
Y(59)	0	0	0	0	1.28244e-06	0	6.4122e-07	0	0	0	0	6.4122e-07	0	0	0	0	0
T(35)	1.60305e-06	0	6.4122e-07	0	0	0	0	3.2061e-07	0	0	0	0	0	0	0	0	0
L(12)	0	0	0	0	0	0	0	0	0	0	0	1.60305e-06	0	3.2061e-07	0	0	0
N(15)	0	0	0	9.6183e-07	0	0	0	0	0	0	0	0	0	3.2061e-07	0	6.4122e-07	0
R(38)	0	0	0	0	0	6.4122e-07	0	0	0	0	0	0	0	0	0	0	0
M(1)	0	0	0	0	0	0	0	3.2061e-07	0	0	0	0	0	0	0	0	0

## Sheet: North America
	A	R	N	D	C	Q	G	H	I	L	K	M	F	P	S	T	Y	V
T(9)	7.28726e-06	2.02424e-06	0	0	0	0	0	0	0.00668282	0	0	0	0	0	4.45332e-06	0	0	4.04848e-07
P(71)	1.61939e-06	6.72047e-05	0	0	0	0	0	6.51805e-05	0	0.00230358	0	0	0	0	0.00109957	1.94327e-05	4.04848e-07	4.04848e-07
L(21)	4.04848e-07	0	0	0	0	0	0	0	0.000129146	0	0	0	0.00188052	4.85817e-06	0	0	0	0.000935603
V(62)	2.02424e-06	0	0	0	0	0	0	0	4.00799e-05	6.88241e-06	0	0	0.00244285	0	0	0	0	0
L(73)	0	2.02424e-06	0	0	0	0	0	1.21454e-06	1.90278e-05	0	0	0	0.0011526	1.65988e-05	0	0	0	1.336e-05
S(68)	6.88241e-06	0	0	0	1.53842e-05	0	0	0	0	0	0	0	0.00104491	2.83393e-05	0	4.04848e-07	2.87442e-05	0
V(58)	2.02424e-06	0	0	0	0	0	1.21454e-06	0	0.000129551	9.95925e-05	0	0	0.0006514	0	0	0	0	0
V(49)	8.5018e-06	0	0	0	0	0	0	0	0	0.000710508	0	1.90278e-05	0	0	0	0	0	0
D(72)	3.03636e-05	0	5.82981e-05	0	8.09695e-07	0	0.000414159	2.02424e-06	0	0	0	0	0	0	0	0	0.000123883	1.37648e-05
S(55)	1.61939e-06	0	0	0	1.53842e-05	0	0	0	0	1.21454e-06	0	0	0.000454644	8.09695e-07	0	0	5.26302e-06	0
V(52)	8.09695e-07	0	0	0	0	0	4.04848e-07	0	8.58277e-05	0.000333594	0	0	0	0	0	0	0	0
V(24)	3.1983e-05	0	0	0	0	0	4.04848e-07	0	0	0.000107285	0	0.000233192	4.04848e-07	0	0	0	0	0
R(69)	0	0	0	0	0	0	1.09309e-05	0	0.000152223	0	2.30763e-05	0	0	0	0.000143721	3.23878e-06	0	0
A(41)	0	0	0	0	0	0	4.04848e-07	0	0	0	0	0	0	0	0.00011862	3.64363e-06	0	0.000191493
V(5)	1.21454e-06	0	0	0	0	0	0	0	0.000215379	1.0526e-05	0	0	1.21454e-05	0	4.04848e-07	0	0	0
V(70)	6.47756e-06	0	0	0	0	0	4.85817e-06	0	0.000136839	6.07271e-06	0	0	4.61526e-05	0	8.09695e-07	0	0	0
T(30)	6.51805e-05	4.04848e-07	4.04848e-07	0	0	0	4.04848e-07	0	0.000114167	8.09695e-07	4.04848e-07	0	0	0	1.61939e-06	0	0	0
S(67)	3.23878e-06	0	0	0	4.04848e-06	0	0	0	0	0	0	0	0.000153842	1.8623e-05	0	4.04848e-07	2.02424e-06	0
F(26)	0	0	0	0	1.61939e-06	0	0	0	4.04848e-07	0.000171655	0	0	0	0	4.45332e-06	0	4.04848e-07	3.64363e-06
R(61)	0	0	0	0	2.42909e-05	0	0	0.000117406	0	3.84605e-05	0	0	0	0	4.04848e-07	0	0	4.04848e-07
N(66)	0	0	0	5.26302e-06	0	0	0	8.09695e-07	1.13357e-05	0	1.29551e-05	0	0	0	3.80557e-05	9.71634e-06	5.10108e-05	0
V(75)	8.90665e-06	0	0	0	0	0	4.04848e-07	0	2.63151e-05	8.78519e-05	0	0	2.83393e-06	0	0	0	0	0
S(16)	0	0	3.11733e-05	0	1.21454e-06	0	6.84193e-05	0	1.29551e-05	0	0	0	0	0	0	1.13357e-05	0	0
E(8)	3.23878e-06	0	0	8.05647e-05	0	1.21454e-06	2.9149e-05	0	0	0	7.69211e-06	0	0	0	0	0	0	1.61939e-06
L(51)	0	0	0	0	0	0	0	0	5.54641e-05	0	0	0	5.95126e-05	8.09695e-07	0	0	0	0
C(43)	0	1.21454e-06	0	0	0	0	0	0	0	0	0	0	0.000110523	0	0	0	4.04848e-07	0
I(46)	0	0	0	0	0	0	0	0	0	0	0	4.04848e-07	1.61939e-06	0	0	0	0	0.00010688
L(19)	0	0	0	0	0	0	0	0	1.17406e-05	0	0	0	5.0606e-05	5.66787e-06	4.04848e-07	0	0	3.1983e-05
F(4)	0	0	0	0	0	0	0	0	1.21454e-06	9.3115e-05	0	0	0	0	4.04848e-07	0	4.04848e-07	0
C(44)	0	2.02424e-06	0	0	0	0	4.04848e-07	0	0	0	0	0	7.85404e-05	0	1.61939e-06	0	6.88241e-06	0
S(50)	0	0	0	0	2.83393e-06	0	3.40072e-05	0	3.76508e-05	0	0	0	0	0	0	2.42909e-06	0	0
F(23)	0	0	0	0	8.09695e-06	0	0	0	6.88241e-06	4.89866e-05	0	0	0	0	1.61939e-06	0	0	8.09695e-07
N(64)	0	0	0	8.09695e-07	0	0	0	1.21454e-06	4.04848e-07	0	2.02424e-06	0	0	0	4.85817e-05	1.17406e-05	1.21454e-06	0
L(18)	0	4.04848e-07	0	0	0	0	0	4.04848e-07	1.0526e-05	0	0	0	2.3886e-05	4.04848e-07	0	0	0	2.83393e-05
A(22)	0	0	0	0	4.04848e-07	0	0	0	0	0	0	0	4.04848e-07	4.04848e-07	2.42909e-05	2.02424e-06	0	3.48169e-05
E(7)	2.02424e-06	0	0	1.53842e-05	0	1.21454e-06	1.21454e-06	0	0	0	3.92702e-05	0	0	0	0	0	0	3.23878e-06
I(33)	0	0	0	0	0	0	0	0	0	0	0	0	2.02424e-06	0	0	5.95126e-05	0	4.04848e-07
G(10)	4.04848e-07	3.64363e-06	0	0	3.07684e-05	0	0	0	0	0	0	0	0	0	1.98375e-05	0	0	5.26302e-06
L(74)	0	0	0	0	0	1.61939e-06	0	0	0	0	0	2.3886e-05	0	2.46957e-05	0	0	0	8.90665e-06
L(37)	0	4.04848e-07	0	0	4.04848e-07	0	0	4.04848e-07	1.21454e-06	0	0	0	4.73672e-05	8.09695e-07	0	0	0	0
F(20)	0	0	0	0	0	0	0	0	1.8623e-05	2.63151e-05	0	0	0	0	3.23878e-06	0	0	4.04848e-07
A(36)	0	0	0	0	0	0	0	0	0	0	0	0	0	0	2.42909e-06	1.21454e-05	0	3.31975e-05
S(3)	2.02424e-06	0	0	0	0	0	0	0	0	2.30763e-05	0	0	0	1.94327e-05	0	2.02424e-06	0	0
T(11)	2.46957e-05	8.09695e-07	0	0	0	0	0	0	0	4.04848e-07	0	1.29551e-05	0	0	4.04848e-07	0	0	0
S(60)	2.22666e-05	0	4.04848e-07	0	0	0	0	0	0	4.04848e-07	0	0	1.61939e-06	4.04848e-07	0	4.85817e-06	6.47756e-06	0
V(14)	8.5018e-06	0	0	0	0	0	0	0	1.49794e-05	4.04848e-06	0	0	8.5018e-06	0	0	0	0	0
I(13)	0	4.04848e-07	0	0	0	0	0	0	0	8.5018e-06	0	8.5018e-06	0	0	0	0	0	1.70036e-05
F(56)	0	0	0	0	4.04848e-07	0	0	0	2.02424e-06	2.3886e-05	0	0	0	4.04848e-07	8.09695e-07	0	1.21454e-06	0
L(27)	0	0	0	0	0	0	0	0	0	0	0	0	2.34812e-05	0	4.04848e-06	0	0	0
L(65)	0	3.64363e-06	0	0	0	2.83393e-06	0	0	0	0	0	1.65988e-05	0	2.02424e-06	0	0	0	0
S(6)	4.04848e-07	0	0	0	0	0	0	0	0	8.09695e-06	0	0	0	4.45332e-06	0	8.09695e-06	0	0
K(63)	0	1.74084e-05	2.02424e-06	0	0	4.04848e-07	4.04848e-07	0	4.04848e-07	0	0	0	0	0	0	0	0	0
V(47)	0	0	0	0	0	0	4.04848e-07	0	1.61939e-06	4.85817e-06	0	0	1.336e-05	0	0	0	0	0
Y(42)	0	0	8.09695e-07	0	3.23878e-06	0	0	9.3115e-06	0	0	0	0	3.64363e-06	0	4.04848e-07	0	0	0
K(53)	0	1.21454e-05	2.02424e-06	0	0	1.61939e-06	0	0	8.09695e-07	0	0	0	0	0	0	0	0	0
N(48)	0	0	0	3.23878e-06	0	0	0	4.04848e-07	0	0	4.04848e-07	0	0	0	7.69211e-06	4.04848e-07	3.64363e-06	0
C(40)	0	0	0	0	0	0	8.09695e-07	0	0	0	0	0	1.09309e-05	0	4.04848e-07	0	4.04848e-07	0
A(32)	0	0	0	4.04848e-07	0	0	0	0	0	0	0	0	0	4.04848e-07	2.42909e-06	1.21454e-06	0	7.69211e-06
N(45)	0	0	0	4.04848e-06	0	0	0	0	1.21454e-06	0	1.61939e-06	0	0	0	2.42909e-06	1.61939e-06	8.09695e-07	0
V(29)	4.04848e-06	0	0	0	0	0	0	0	2.42909e-06	8.09695e-07	0	0	3.23878e-06	0	0	0	0	0
Y(59)	0	0	0	0	7.28726e-06	0	0	2.42909e-06	0	0	0	0	0	0	4.04848e-07	4.04848e-07	0	0
V(25)	5.66787e-06	0	0	0	0	0	0	0	4.04848e-07	2.83393e-06	0	0	4.04848e-07	0	0	0	0	0
P(54)	0	4.04848e-07	0	0	0	0	0	4.04848e-07	0	4.04848e-06	0	0	0	0	4.04848e-06	0	0	0
V(17)	4.04848e-06	0	0	0	0	0	0	0	1.21454e-06	1.61939e-06	0	0	0	0	0	0	0	0
L(12)	0	0	0	0	0	0	0	0	4.04848e-07	0	0	0	5.26302e-06	0	4.04848e-07	0	0	0
L(28)	0	0	0	0	0	0	0	0	2.02424e-06	0	0	0	4.04848e-07	1.21454e-06	0	0	0	2.02424e-06
N(15)	0	0	0	2.42909e-06	0	0	0	4.04848e-07	4.04848e-07	0	0	0	0	0	1.61939e-06	4.04848e-07	4.04848e-07	0
M(1)	0	0	0	0	0	0	0	0	1.61939e-06	0	1.61939e-06	0	0	0	0	4.04848e-07	0	0
L(34)	0	0	0	0	0	0	0	0	0	0	0	0	2.83393e-06	8.09695e-07	0	0	0	0
T(35)	1.61939e-06	0	0	0	0	0	0	0	8.09695e-07	0	0	0	0	0	4.04848e-07	0	0	0
R(38)	0	0	0	0	0	1.61939e-06	0	0	0	8.09695e-07	0	0	0	4.04848e-07	0	0	0	0
L(31)	0	4.04848e-07	0	0	0	0	0	0	8.09695e-07	0	0	0	0	1.21454e-06	0	0	0	0
Y(2)	0	0	4.04848e-07	0	0	0	0	1.21454e-06	0	0	0	0	0	0	0	0	0	0
L(39)	0	0	0	0	0	0	0	0	0	0	0	0	8.09695e-07	0	4.04848e-07	0	0	0
Y(57)	0	0	4.04848e-07	0	0	0	0	0	0	0	0	0	4.04848e-07	0	0	4.04848e-07	0	0

## Sheet: Occeania
	A	C	E	G	H	I	L	K	M	F	P	S	V
T(9)	0	0	0	0	0	0.0249599	0	0	0	0	0	0	0
P(71)	0	0	0	0	0	0	0.00192936	0	0	0	0	8.12364e-05	2.03091e-05
L(74)	0	0	0	0	0	0	0	0	0.00069051	0	0	0	2.03091e-05
S(68)	0	0	0	0	0	0	0	0	0	0.000487419	0	0	0
L(21)	0	0	0	0	0	2.03091e-05	0	0	0	0.000365564	0	0	4.06182e-05
V(62)	0	0	0	0	0	0	0	0	0	0.000406182	0	0	0
L(73)	0	0	0	0	0	0	0	0	0	0.000385873	0	0	0
V(49)	0.000142164	0	0	0	0	0	0.000101546	0	0	0	0	0	0
V(58)	0	0	0	0	0	0	0	0	0	0.0002234	0	0	0
V(24)	2.03091e-05	0	0	0	0	0	0	0	0.000203091	0	0	0	0
R(61)	0	8.12364e-05	0	0	0	0	6.09273e-05	0	0	0	0	0	0
C(43)	0	0	0	0	0	0	0	0	0	6.09273e-05	0	4.06182e-05	0
R(69)	0	0	0	2.03091e-05	0	4.06182e-05	0	2.03091e-05	0	0	0	2.03091e-05	0
T(30)	0	0	0	0	0	8.12364e-05	0	0	0	0	0	0	0
L(51)	0	0	0	0	0	8.12364e-05	0	0	0	0	0	0	0
A(22)	0	0	0	0	0	0	0	0	0	0	2.03091e-05	0	4.06182e-05
N(66)	0	0	0	0	6.09273e-05	0	0	0	0	0	0	0	0
L(37)	0	0	0	0	0	0	0	0	0	6.09273e-05	0	0	0
V(47)	0	0	0	0	0	0	0	0	0	4.06182e-05	0	0	0
G(10)	0	2.03091e-05	0	0	0	0	0	0	0	0	0	0	2.03091e-05
V(52)	0	0	0	0	0	2.03091e-05	2.03091e-05	0	0	0	0	0	0
S(55)	0	0	0	0	0	0	0	0	0	4.06182e-05	0	0	0
A(41)	0	0	0	0	0	0	0	0	0	0	0	0	4.06182e-05
D(72)	0	0	2.03091e-05	2.03091e-05	0	0	0	0	0	0	0	0	0
F(56)	0	0	0	0	0	0	4.06182e-05	0	0	0	0	0	0
S(67)	0	0	0	0	0	0	0	0	0	0	4.06182e-05	0	0
V(14)	0	0	0	0	0	0	2.03091e-05	0	0	2.03091e-05	0	0	0
V(5)	0	0	0	0	0	0	4.06182e-05	0	0	0	0	0	0
Y(42)	0	0	0	0	0	0	0	0	0	2.03091e-05	0	0	0
V(75)	0	0	0	0	0	0	0	0	0	2.03091e-05	0	0	0
V(25)	0	0	0	2.03091e-05	0	0	0	0	0	0	0	0	0
F(4)	0	0	0	0	0	0	2.03091e-05	0	0	0	0	0	0
I(46)	0	0	0	0	0	0	0	0	0	0	0	0	2.03091e-05
V(17)	2.03091e-05	0	0	0	0	0	0	0	0	0	0	0	0
F(23)	0	0	0	0	0	0	2.03091e-05	0	0	0	0	0	0
Y(57)	0	2.03091e-05	0	0	0	0	0	0	0	0	0	0	0
Y(59)	0	0	0	0	2.03091e-05	0	0	0	0	0	0	0	0
S(6)	0	0	0	0	0	0	0	0	0	0	2.03091e-05	0	0
F(20)	0	0	0	0	0	0	0	0	0	0	0	0	0
L(19)	0	0	0	0	0	0	0	0	0	0	0	0	0
L(18)	0	0	0	0	0	0	0	0	0	0	0	0	0
S(3)	0	0	0	0	0	0	0	0	0	0	0	0	0
S(16)	0	0	0	0	0	0	0	0	0	0	0	0	0
N(15)	0	0	0	0	0	0	0	0	0	0	0	0	0
Y(2)	0	0	0	0	0	0	0	0	0	0	0	0	0
I(13)	0	0	0	0	0	0	0	0	0	0	0	0	0
L(12)	0	0	0	0	0	0	0	0	0	0	0	0	0
E(8)	0	0	0	0	0	0	0	0	0	0	0	0	0
E(7)	0	0	0	0	0	0	0	0	0	0	0	0	0
T(11)	0	0	0	0	0	0	0	0	0	0	0	0	0
R(38)	0	0	0	0	0	0	0	0	0	0	0	0	0
F(26)	0	0	0	0	0	0	0	0	0	0	0	0	0
L(27)	0	0	0	0	0	0	0	0	0	0	0	0	0
V(70)	0	0	0	0	0	0	0	0	0	0	0	0	0
L(65)	0	0	0	0	0	0	0	0	0	0	0	0	0
N(64)	0	0	0	0	0	0	0	0	0	0	0	0	0
K(63)	0	0	0	0	0	0	0	0	0	0	0	0	0
S(60)	0	0	0	0	0	0	0	0	0	0	0	0	0
P(54)	0	0	0	0	0	0	0	0	0	0	0	0	0
K(53)	0	0	0	0	0	0	0	0	0	0	0	0	0
S(50)	0	0	0	0	0	0	0	0	0	0	0	0	0
N(48)	0	0	0	0	0	0	0	0	0	0	0	0	0
N(45)	0	0	0	0	0	0	0	0	0	0	0	0	0
C(44)	0	0	0	0	0	0	0	0	0	0	0	0	0
C(40)	0	0	0	0	0	0	0	0	0	0	0	0	0
L(39)	0	0	0	0	0	0	0	0	0	0	0	0	0
A(36)	0	0	0	0	0	0	0	0	0	0	0	0	0
T(35)	0	0	0	0	0	0	0	0	0	0	0	0	0
L(34)	0	0	0	0	0	0	0	0	0	0	0	0	0
I(33)	0	0	0	0	0	0	0	0	0	0	0	0	0
A(32)	0	0	0	0	0	0	0	0	0	0	0	0	0
L(31)	0	0	0	0	0	0	0	0	0	0	0	0	0
V(29)	0	0	0	0	0	0	0	0	0	0	0	0	0
L(28)	0	0	0	0	0	0	0	0	0	0	0	0	0
M(1)	0	0	0	0	0	0	0	0	0	0	0	0	0

## Sheet: South America
	A	R	N	D	C	E	Q	G	H	I	L	K	M	F	P	S	T	Y	V
T(9)	6.8704e-06	0	0	0	0	0	0	0	0	0.0049673	0	0	0	0	0	0	0	0	0
P(71)	0	4.80928e-05	0	0	0	0	0	0	6.18336e-05	0	0.00127789	0	0	0	0	0.00212982	6.8704e-06	0	0
V(58)	0	0	0	0	0	0	0	0	0	2.74816e-05	7.55744e-05	0	0	0.00221227	0	0	0	0	0
A(41)	0	0	0	0	0	0	0	0	0	0	0	0	0	0	0	9.61856e-05	0	0	0.00221227
L(73)	0	7.55744e-05	0	0	0	0	0	0	1.37408e-05	0.000226723	0	0	0	0.00150462	0	0	0	0	6.8704e-06
R(69)	0	0	0	0	0	0	0	0.00151836	0	7.55744e-05	0	3.4352e-05	0	0	0	5.49632e-05	1.37408e-05	0	0
S(68)	0	0	0	0	3.4352e-05	0	0	0	0	0	0	0	0	0.00150462	4.12224e-05	0	0	4.80928e-05	0
L(51)	0	0	0	0	0	0	0	0	0	0.00142217	0	0	0	4.12224e-05	0	0	0	0	0
V(62)	0	0	0	0	0	0	0	0	0	2.74816e-05	2.06112e-05	0	0	0.00126415	0	0	0	0	0
L(21)	0	0	0	0	0	0	0	0	0	1.37408e-05	0	0	0	0.000989337	0	0	0	0	6.8704e-06
S(55)	0	0	0	0	6.8704e-06	0	0	0	0	0	0	0	0	0.000893152	0	0	0	0	0
V(49)	0	0	0	0	0	0	0	0	0	0	0.000467187	0	1.37408e-05	0	0	0	0	0	0
V(24)	0.000137408	0	0	0	0	0	0	0	0	0	0.00017863	0	0.000151149	0	0	0	0	0	0
D(72)	1.37408e-05	0	2.06112e-05	0	0	4.12224e-05	0	0.000206112	0	0	0	0	0	0	0	0	0	0.000144278	0
L(74)	0	0	0	0	0	0	8.93152e-05	0	0	0	0	0	2.06112e-05	0	0.000103056	0	0	0	6.18336e-05
T(30)	8.93152e-05	0	0	0	0	0	0	8.24448e-05	0	9.61856e-05	0	0	0	0	0	0	0	0	0
V(5)	6.8704e-05	0	0	0	0	0	0	0	2.06112e-05	0.000130538	0	0	0	0	0	0	0	0	0
E(8)	0	0	0	0.000185501	0	0	0	1.37408e-05	0	0	0	0	0	0	0	0	0	0	0
V(75)	6.8704e-06	0	0	0	0	0	0	0	0	2.74816e-05	0.000137408	0	0	0	0	0	0	0	0
R(61)	0	0	0	0	6.8704e-06	0	0	0	6.18336e-05	0	8.93152e-05	0	0	0	0	0	0	0	0
V(70)	2.74816e-05	0	0	0	0	0	0	0	0	8.93152e-05	0	0	0	2.74816e-05	0	0	0	0	0
C(43)	0	0	0	0	0	0	0	0	0	0	0	0	0	0.000123667	0	0	0	0	0
V(52)	0	0	0	0	0	6.8704e-06	0	0	0	6.18336e-05	4.12224e-05	0	0	0	0	1.37408e-05	0	0	0
L(19)	0	0	0	0	0	0	0	0	0	4.12224e-05	0	0	0	6.18336e-05	0	0	0	0	0
N(66)	0	0	0	0	0	0	0	0	0	1.37408e-05	0	3.4352e-05	0	0	0	1.37408e-05	2.74816e-05	0	0
F(26)	0	0	0	0	6.8704e-06	0	0	0	0	0	6.8704e-05	0	0	0	0	1.37408e-05	0	0	0
S(67)	0	0	0	0	0	0	0	0	0	0	0	0	0	8.24448e-05	6.8704e-06	0	0	0	0
S(6)	3.4352e-05	0	0	0	0	0	0	0	0	0	6.8704e-06	0	0	0	6.8704e-06	0	2.74816e-05	0	0
F(4)	0	0	0	0	0	0	0	0	0	0	4.12224e-05	0	0	0	0	0	0	0	2.06112e-05
S(50)	0	0	0	0	0	0	0	1.37408e-05	0	4.80928e-05	0	0	0	0	0	0	0	0	0
A(36)	0	0	0	0	0	0	0	0	0	0	6.8704e-06	0	0	0	0	0	6.8704e-06	0	4.12224e-05
F(56)	0	0	0	0	0	0	0	0	0	0	4.80928e-05	0	0	0	0	0	0	0	6.8704e-06
S(3)	0	0	0	0	0	0	0	0	0	0	5.49632e-05	0	0	0	0	0	0	0	0
E(7)	0	0	0	2.06112e-05	0	0	6.8704e-06	6.8704e-06	0	0	0	6.8704e-06	0	0	0	0	0	0	6.8704e-06
I(46)	0	0	0	0	0	0	0	0	0	0	0	0	0	0	0	0	0	0	4.12224e-05
P(54)	0	0	0	0	0	0	0	0	0	0	6.8704e-06	0	0	0	0	2.06112e-05	1.37408e-05	0	0
A(22)	0	0	0	0	0	0	0	0	0	0	0	0	0	0	0	6.8704e-06	0	0	2.74816e-05
F(23)	0	0	0	0	6.8704e-06	0	0	0	0	0	2.74816e-05	0	0	0	0	0	0	0	0
I(33)	0	0	0	0	0	0	0	0	0	0	0	0	0	0	0	0	3.4352e-05	0	0
N(64)	0	0	0	6.8704e-06	0	0	0	0	0	0	0	6.8704e-06	0	0	0	1.37408e-05	0	0	0
S(60)	1.37408e-05	0	0	0	0	0	0	0	0	0	0	0	0	6.8704e-06	0	0	0	6.8704e-06	0
T(11)	2.06112e-05	0	0	0	0	0	0	0	0	0	0	0	6.8704e-06	0	0	0	0	0	0
L(37)	0	6.8704e-06	0	0	0	0	0	0	0	0	0	0	0	2.06112e-05	0	0	0	0	0
V(25)	1.37408e-05	0	0	0	0	0	0	0	0	6.8704e-06	6.8704e-06	0	0	0	0	0	0	0	0
L(27)	0	0	0	0	0	0	0	0	0	0	0	0	0	2.74816e-05	0	0	0	0	0
L(18)	0	6.8704e-06	0	0	0	0	0	0	0	0	0	0	0	2.06112e-05	0	0	0	0	0
V(47)	0	0	0	0	0	0	0	0	0	0	0	0	0	2.06112e-05	0	0	0	0	0
V(29)	0	0	0	0	0	0	0	0	0	2.06112e-05	0	0	0	0	0	0	0	0	0
S(16)	0	0	6.8704e-06	0	0	0	0	1.37408e-05	0	0	0	0	0	0	0	0	0	0	0
G(10)	0	0	0	0	1.37408e-05	0	0	0	0	0	0	0	0	0	0	6.8704e-06	0	0	0
V(17)	1.37408e-05	0	0	0	0	0	0	0	0	0	0	0	0	0	0	0	0	0	0
L(12)	0	0	0	0	0	0	0	0	0	0	0	0	0	6.8704e-06	0	0	0	0	6.8704e-06
C(44)	0	0	0	0	0	0	0	0	0	0	0	0	0	6.8704e-06	0	0	0	6.8704e-06	0
Y(2)	0	0	0	0	6.8704e-06	0	0	0	6.8704e-06	0	0	0	0	0	0	0	0	0	0
F(20)	0	0	0	0	0	0	0	0	0	0	0	0	0	0	0	1.37408e-05	0	0	0
V(14)	0	0	0	0	0	0	0	0	0	0	6.8704e-06	0	0	0	0	0	0	0	0
R(38)	0	0	0	0	0	0	6.8704e-06	0	0	0	0	0	0	0	0	0	0	0	0
L(28)	0	0	0	0	0	0	6.8704e-06	0	0	0	0	0	0	0	0	0	0	0	0
C(40)	0	0	0	0	0	0	0	6.8704e-06	0	0	0	0	0	0	0	0	0	0	0
L(65)	0	0	0	0	0	0	0	0	0	0	0	0	0	0	6.8704e-06	0	0	0	0
Y(57)	0	0	0	0	0	0	0	0	0	0	0	0	0	6.8704e-06	0	0	0	0	0
N(48)	0	0	0	6.8704e-06	0	0	0	0	0	0	0	0	0	0	0	0	0	0	0
N(45)	0	0	0	0	0	0	0	0	0	0	0	0	0	0	0	6.8704e-06	0	0	0
M(1)	0	0	0	0	0	0	0	0	0	6.8704e-06	0	0	0	0	0	0	0	0	0
T(35)	0	0	0	0	0	0	0	0	0	0	0	0	0	0	6.8704e-06	0	0	0	0
L(34)	0	0	0	0	0	0	0	0	0	0	0	0	0	6.8704e-06	0	0	0	0	0
A(32)	0	0	0	0	0	0	0	0	0	0	0	0	0	0	0	0	0	0	6.8704e-06
L(39)	0	0	0	0	0	0	0	0	0	0	0	0	0	0	0	0	0	0	0
L(31)	0	0	0	0	0	0	0	0	0	0	0	0	0	0	0	0	0	0	0
I(13)	0	0	0	0	0	0	0	0	0	0	0	0	0	0	0	0	0	0	0
K(53)	0	0	0	0	0	0	0	0	0	0	0	0	0	0	0	0	0	0	0
N(15)	0	0	0	0	0	0	0	0	0	0	0	0	0	0	0	0	0	0	0
Y(59)	0	0	0	0	0	0	0	0	0	0	0	0	0	0	0	0	0	0	0
K(63)	0	0	0	0	0	0	0	0	0	0	0	0	0	0	0	0	0	0	0
Y(42)	0	0	0	0	0	0	0	0	0	0	0	0	0	0	0	0	0	0	0
