# Supplementary material for: Mutations in SARS-CoV-2 structural proteins: a global analysis
Source: Virol J. 2022 Dec 18;19:220. doi: 10.1186/s12985-022-01951-7 (PMC9759450; doi:10.1186/s12985-022-01951-7)
Supplement: Supplementary file 2 — Additional file 2: Mutation’s features of the M protein and the attributed frequencies among six continents and globally. [file 12985_2022_1951_MOESM2_ESM.xlsx]

## Sheet: Total
	A	R	N	D	C	E	Q	G	H	I	L	K	M	F	P	S	T	Y	V
I(82)	4.16033e-05	0	1.94256e-06	0	0	0	0	0	0	0	4.37077e-06	0	1.29504e-06	3.23761e-07	0.000364716	0.000800498	0.601543	0	5.13161e-05
D(3)	6.63709e-06	0	3.26998e-05	0	0	8.09402e-06	0	0.00775018	0.000104413	1.6188e-07	0	0	0	0	0	3.23761e-07	0	0.00017305	1.35979e-05
A(63)	0	1.6188e-07	1.6188e-07	1.6188e-06	1.6188e-07	0	0	3.23761e-07	0	0	1.6188e-07	0	0	1.6188e-07	0	0.00023246	0.00733561	0	0.00012141
Q(19)	0	3.77181e-05	1.6188e-07	0	0	0.00726114	0	0	3.88513e-05	0	1.6188e-07	3.72325e-06	0	0	4.85641e-07	0	0	1.6188e-07	0
A(2)	0	0	0	0	0	5.01829e-06	0	8.09402e-07	0	0	3.23761e-06	0	0	0	2.41202e-05	0.00332972	0.000217729	0	0.00137857
V(70)	3.3833e-05	8.09402e-07	0	0	0	0	0	1.6188e-07	0	0.000174183	0.00313271	0	0	0.000804869	0	0	0	1.6188e-07	0
A(81)	0	0	0	1.6188e-07	0	0	0	4.85641e-07	0	1.6188e-07	0	0	0	0	3.23761e-07	0.00385469	4.85641e-07	0	1.6188e-07
F(28)	0	0	0	0	4.85641e-07	0	0	0	0	1.6188e-07	0.00330317	0	0	0	1.6188e-07	2.10444e-06	0	1.6188e-07	8.09402e-07
S(197)	0	9.71282e-07	0.00269563	0	3.23761e-07	0	0	1.6188e-07	0	8.41778e-06	0	0	0	0	0	0	1.79687e-05	1.29504e-06	0
T(30)	1.06841e-05	0	0	0	0	0	0	0	0	0.00255026	0	3.23761e-07	0	0	0	1.78068e-06	0	0	0
H(125)	0	4.96973e-05	4.09557e-05	5.18017e-06	1.6188e-07	0	1.14935e-05	0	0	0	2.05588e-05	0	0	0	0	1.6188e-07	0	0.00147845	0
D(209)	1.6188e-06	0	5.89244e-05	0	0	9.8747e-06	0	2.65484e-05	8.53109e-05	3.23761e-07	0	0	0	0	0	0	3.23761e-07	0.00109949	2.10444e-06
L(29)	0	1.6188e-07	0	0	0	0	0	0	1.6188e-07	7.93214e-06	0	0	0	0.00110807	1.13316e-06	0	1.6188e-07	0	3.56137e-06
V(23)	1.894e-05	0	0	0	0	0	0	1.6188e-07	0	9.13005e-05	0.000861365	0	0	0	0	2.42821e-06	0	0	0
A(69)	0	0	0	3.23761e-07	0	0	0	6.79897e-06	0	0	0	0	0	1.6188e-07	8.09402e-07	0.000752258	1.82925e-05	8.09402e-07	0.000184867
H(155)	0	5.73056e-05	3.23761e-05	6.47521e-07	0	0	3.39949e-06	0	0	0	7.12274e-06	0	0	0	4.69453e-06	0	0	0.000717777	0
A(85)	0	0	0	4.53265e-06	1.6188e-07	0	0	1.13316e-06	0	0	8.09402e-07	0	0	0	0	0.000497782	1.39217e-05	0	0.000302716
S(94)	0	4.69453e-06	7.28462e-06	0	1.42455e-05	0	0	0.000648816	0	5.69819e-05	0	0	0	8.09402e-07	0	0	8.75773e-05	1.6188e-07	0
M(109)	0	0	0	0	0	0	0	0	0	0.000617735	5.58487e-05	0	0	0	0	8.09402e-07	3.75562e-05	0	5.19636e-05
S(212)	0	2.21776e-05	8.96817e-05	0	2.39583e-05	0	0	0.000438696	0	6.92848e-05	0	0	0	0	0	0	2.91385e-06	0	0
A(98)	0	0	0	3.56137e-06	0	0	0	1.29504e-06	0	0	0	3.23761e-07	0	8.09402e-07	0	0.000469129	8.91961e-05	0	5.56868e-05
L(17)	0	0	0	0	0	1.6188e-07	1.6188e-07	0	0	0.000163499	0	0	0	0.000440962	6.47521e-07	1.6188e-07	0	0	5.01829e-06
G(89)	1.6188e-07	0	0	4.04701e-06	3.77181e-05	0	0	0	0	0	1.6188e-07	0	8.09402e-07	0	0	0.000566905	0	0	3.23761e-07
L(34)	0	1.6188e-07	0	0	6.47521e-07	0	0	0	0	5.66581e-06	0	0	0	0.000545051	1.6188e-07	0	0	0	6.47521e-07
A(104)	0	1.6188e-07	0	0	0	0	0	1.6188e-07	0	0	1.6188e-07	3.23761e-07	3.23761e-07	0	0	5.50393e-06	2.91385e-06	0	0.000528539
I(76)	0	0	3.23761e-07	0	0	0	0	8.09402e-07	0	0	5.66581e-06	0	2.10444e-06	3.23761e-06	0	8.2559e-06	0.000120277	0	0.000385275
K(15)	0	8.35303e-05	0.000329265	0	0	2.63865e-05	3.54518e-05	0	0	0	3.23761e-07	0	5.50393e-06	0	0	1.78068e-06	3.07573e-06	0	0
T(175)	9.71282e-07	1.13316e-06	6.47521e-07	0	0	0	0	0	0	1.6188e-07	0	8.09402e-06	0.00046832	0	0	1.6188e-07	0	0	0
T(208)	5.82769e-06	5.66581e-06	3.23761e-07	0	0	0	0	0	0	0.000426717	0	1.68356e-05	0	0	1.45692e-06	1.14935e-05	0	0	0
I(52)	0	0	1.6188e-07	0	0	0	0	0	0	0	4.69453e-06	0	1.45692e-06	1.34361e-05	0	2.91385e-06	0.000412795	0	2.68721e-05
G(6)	1.6188e-07	0	0	0.000146987	4.50027e-05	0	0	0	0	0	0	0	0	0	0	7.64075e-05	0	0	0.000117525
S(4)	1.81306e-05	0	0	0	4.85641e-07	0	0	0	0	0	0	0	0	0.000335902	1.57024e-05	0	4.85641e-07	8.41778e-06	0
C(33)	0	1.6188e-07	0	0	0	0	0	4.85641e-07	0	1.6188e-07	2.26632e-06	0	0	0.000236669	0	0.00013857	0	8.09402e-07	0
V(10)	0.000233755	0	0	0	0	1.6188e-07	0	9.71282e-07	0	0.000126429	0	0	0	1.7645e-05	0	0	0	0	0
V(66)	3.12429e-05	0	0	0	0	0	0	2.75197e-06	0	0	0.000313886	0	2.47677e-05	1.45692e-06	0	0	0	0	0
L(87)	0	0	0	0	0	0	0	8.09402e-07	0	1.57024e-05	0	0	0	0.000350633	1.6188e-07	3.23761e-07	0	0	9.71282e-07
M(84)	1.6188e-07	1.6188e-07	0	0	8.09402e-07	0	0	0	0	0.000154758	5.45537e-05	0	0	0	0	0	0.000117525	0	3.57756e-05
L(46)	0	0	0	0	0	0	0	0	0	0	0	0	0	0.000353385	0	0	0	1.6188e-07	0
I(48)	0	1.6188e-07	0	0	1.6188e-07	0	0	0	0	0	2.34727e-05	0	3.39949e-06	0	0	0	4.22508e-05	4.85641e-07	0.000267103
C(86)	0	0	0	0	0	0	0	9.71282e-07	0	4.85641e-07	3.23761e-07	0	0	0.000297212	0	2.52533e-05	0	4.85641e-07	8.09402e-07
R(158)	0	0	0	0	8.35303e-05	0	0	3.23761e-07	4.45171e-05	0	0.000187134	0	0	0	8.09402e-07	6.96086e-06	0	0	0
R(107)	0	0	0	0	3.39949e-06	0	0	1.6188e-07	0.00026516	0	3.788e-05	0	8.09402e-07	0	0	3.39949e-06	0	0	0
K(162)	0	1.44074e-05	0.000280862	0	0	2.59009e-06	1.6188e-06	0	0	3.23761e-07	0	0	5.66581e-06	0	0	0	3.07573e-06	0	0
A(40)	0	0	1.6188e-07	1.6188e-07	0	0	0	0	0	0	0	0	0	0	3.88513e-06	0.000292518	4.85641e-07	6.47521e-07	6.63709e-06
R(146)	0	0	0	0	1.03603e-05	0	0	0	0.00025739	0	1.29504e-05	0	0	3.23761e-07	0	0	0	1.6188e-07	0
Q(185)	0	7.28462e-06	0	0	0	0	0	0	0.000268883	0	3.72325e-06	9.71282e-07	0	0	0	3.23761e-07	0	0	0
S(214)	0	5.34205e-06	9.38906e-06	0	5.34205e-06	0	0	1.00366e-05	0	0.000234403	0	0	0	0	0	0	1.53786e-05	0	0
S(136)	0	0	0.000237964	0	5.01829e-06	3.23761e-07	0	2.71959e-05	0	6.47521e-06	0	0	0	0	0	0	3.23761e-07	0	0
I(201)	0	3.23761e-07	0	0	0	0	0	0	0	0	3.23761e-07	0	0	3.23761e-07	0	0	1.29504e-05	0	0.000260142
W(75)	0	1.35979e-05	0	0	3.07573e-06	0	0	1.29504e-06	0	1.6188e-07	0.000235536	0	1.6188e-07	6.47521e-07	0	5.98957e-06	8.09402e-07	0	0
T(7)	8.2559e-06	0	1.11697e-05	0	0	0	0	0	0	0.000236022	0	0	0	0	0	2.59009e-06	0	0	1.6188e-07
R(44)	0	0	6.47521e-07	0	0	0	0	9.71282e-07	0	0	0	0.00016787	1.47311e-05	1.6188e-07	0	7.12274e-05	0	0	0
H(148)	0	3.02716e-05	4.04701e-06	9.71282e-07	0	0	4.56503e-05	4.85641e-07	0	0	2.42821e-06	0	0	0	1.6188e-07	0	0	0.00016528	0
A(83)	0	0	0	0	0	6.47521e-07	0	0	0	1.6188e-07	1.6188e-07	0	1.6188e-07	0	0	0.000125781	0.000101661	0	1.79687e-05
A(142)	0	0	0	1.6188e-07	0	0	0	9.71282e-07	0	1.6188e-07	0	0	0	0	0	1.05222e-05	3.23761e-07	0	0.000219834
G(78)	6.47521e-07	4.85641e-07	0	4.37077e-06	0.000134361	0	0	0	0	8.09402e-07	0	0	0	1.6188e-07	0	6.13527e-05	0	0	7.4465e-06
K(180)	0	0.000202998	9.71282e-07	0	0	0	0	0	0	1.6188e-07	0	0	0	0	0	0	0	3.23761e-07	0
V(60)	4.85641e-06	1.6188e-07	0	0	0	1.6188e-07	0	9.71282e-07	0	2.71959e-05	0.000144397	0	0	0	0	0	1.6188e-07	0	0
I(80)	1.6188e-07	0	0	0	0	0	0	0	0	0	1.42455e-05	0	7.4465e-06	2.41202e-05	0	5.82769e-06	2.42821e-05	0	0.000101823
C(64)	1.6188e-07	1.6188e-07	0	0	0	0	0	1.6188e-06	0	0	0	0	0	0.000125295	0	4.5974e-05	0	2.59009e-06	0
E(167)	1.29504e-06	0	0	4.43552e-05	0	0	0.000122058	2.91385e-06	0	0	0	2.26632e-06	0	0	0	0	0	0	1.6188e-06
I(73)	0	4.85641e-07	1.6188e-07	0	0	0	0	0	0	0	8.43397e-05	3.23761e-07	4.33839e-05	0	0	0	4.85641e-07	0	2.36345e-05
I(97)	1.6188e-07	3.23761e-07	0	0	0	0	0	0	0	0	1.6188e-06	3.23761e-07	4.69453e-06	2.84909e-05	0	3.07573e-06	4.28983e-05	0	5.82769e-05
L(124)	0	8.09402e-07	0	0	0	0	0	0	0	3.14048e-05	0	0	0	9.48619e-05	9.71282e-07	0	0	0	1.00366e-05
A(68)	0	0	0	4.85641e-07	0	0	0	9.71282e-07	0	0	0	0	0	0	9.71282e-07	0.000117849	2.75197e-06	0	1.78068e-06
A(188)	0	0	0	0	0	3.23761e-07	0	3.23761e-07	0	0	0	0	0	0	1.6188e-07	8.27209e-05	2.86528e-05	0	9.55094e-06
A(38)	0	0	0	1.6188e-07	1.6188e-07	0	0	0	0	0	0	0	0	8.09402e-07	4.85641e-07	0.000113154	6.47521e-07	3.23761e-07	4.85641e-07
N(207)	0	1.6188e-07	0	3.88513e-06	0	0	0	0	2.26632e-06	3.07573e-06	3.23761e-07	6.47521e-05	0	0	0	2.84909e-05	9.71282e-07	1.03603e-05	0
T(77)	1.34361e-05	0	4.37077e-06	0	0	0	0	9.71282e-07	0	6.44284e-05	0	0	0	0	1.6188e-07	1.63499e-05	0	0	0
S(173)	4.85641e-06	0	0	0	0	0	3.23761e-07	0	0	0	3.23761e-07	7.89976e-05	0	0	8.90342e-06	0	5.18017e-06	0	0
F(100)	0	1.6188e-07	0	0	1.97494e-05	0	0	0	0	4.04701e-06	5.73056e-05	3.23761e-07	0	0	0	1.42455e-05	0	0	1.45692e-06
L(93)	0	0	0	0	0	0	0	0	0	1.26267e-05	0	0	1.45692e-06	7.67313e-05	8.09402e-07	4.85641e-07	0	8.09402e-07	0
M(91)	0	0	0	0	0	0	0	0	0	1.73212e-05	4.20889e-05	1.6188e-07	0	0	0	0	1.14935e-05	0	2.05588e-05
I(24)	0	0	0	0	0	0	0	1.6188e-07	0	0	1.73212e-05	1.6188e-07	4.20889e-06	0	0	1.6188e-07	2.65484e-05	0	3.94988e-05
E(11)	1.27885e-05	0	0	2.80053e-05	0	0	2.26632e-06	1.94256e-05	0	0	0	1.55405e-05	0	0	0	0	0	0	9.55094e-06
I(168)	0	9.71282e-07	0	1.6188e-07	0	1.6188e-07	0	0	0	0	4.09557e-05	0	6.47521e-07	5.01829e-06	0	0	0	0	3.90132e-05
N(74)	0	0	0	1.19791e-05	0	0	0	6.47521e-07	6.47521e-07	8.09402e-07	0	3.23761e-07	0	0	0	1.91019e-05	5.08304e-05	1.6188e-06	0
R(101)	0	0	0	0	0	0	0	1.6188e-07	0	3.23761e-07	1.6188e-07	8.27209e-05	0	8.09402e-07	0	0	3.23761e-07	0	0
I(161)	0	0	0	3.23761e-07	0	0	0	0	0	0	1.14935e-05	0	4.04701e-06	5.50393e-06	0	1.6188e-07	3.07573e-06	0	5.71438e-05
I(128)	0	0	0	0	0	0	0	0	0	0	1.6188e-06	0	2.59009e-06	3.23761e-07	0	1.94256e-06	2.63865e-05	0	4.85641e-05
V(88)	1.6188e-07	0	0	0	0	0	0	1.6188e-07	0	2.99479e-05	4.92116e-05	0	0	0	0	0	0	0	0
I(49)	0	0	0	0	0	0	0	0	0	0	4.69453e-06	1.6188e-07	1.6188e-07	2.42821e-06	0	4.85641e-07	4.22508e-05	0	2.76815e-05
E(12)	1.45692e-06	0	0	6.55615e-05	0	0	4.04701e-06	3.56137e-06	0	0	1.6188e-07	1.78068e-06	0	0	0	0	0	0	1.13316e-06
L(129)	0	9.71282e-07	0	0	0	0	2.67103e-05	0	0	3.23761e-07	0	0	3.04335e-05	4.37077e-06	8.09402e-07	0	0	0	1.27885e-05
W(31)	0	3.23761e-07	0	0	5.66581e-05	0	0	4.85641e-07	0	1.6188e-07	1.74831e-05	0	0	1.6188e-07	0	1.6188e-07	0	0	1.6188e-07
L(138)	0	1.6188e-07	0	0	0	3.23761e-07	0	0	0	5.89244e-05	0	0	0	2.75197e-06	8.09402e-06	0	0	0	6.47521e-07
L(90)	0	0	0	0	0	0	0	0	0	0	0	0	8.09402e-07	5.47156e-05	1.6188e-07	1.13316e-05	0	0	2.59009e-06
T(127)	1.39217e-05	0	2.13682e-05	1.6188e-07	0	0	0	3.23761e-07	0	2.93003e-05	0	0	0	0	0	5.50393e-06	0	0	0
I(8)	0	0	3.23761e-07	0	0	0	0	0	0	0	3.39949e-06	0	1.6188e-07	5.66581e-06	0	4.53265e-06	1.79687e-05	0	3.59374e-05
D(160)	2.59009e-06	0	2.59009e-06	0	3.23761e-07	8.09402e-06	0	7.60838e-06	6.47521e-07	0	0	0	0	0	0	0	0	4.45171e-05	1.6188e-07
R(186)	0	0	0	0	4.84022e-05	0	3.23761e-07	1.29504e-06	1.11697e-05	0	1.94256e-06	0	0	0	3.23761e-07	8.09402e-07	0	0	0
I(151)	0	3.23761e-07	1.6188e-07	0	0	0	0	0	0	0	0	0	1.29504e-06	0	0	1.6188e-07	0	0	6.23239e-05
I(144)	0	1.6188e-07	0	0	0	0	0	0	0	0	1.13316e-06	0	1.6188e-07	1.6188e-07	0	1.6188e-07	8.41778e-06	0	5.13161e-05
D(215)	1.29504e-06	0	1.99113e-05	0	0	9.71282e-07	0	6.47521e-06	2.91385e-06	0	0	0	0	0	0	1.6188e-07	0	2.71959e-05	3.23761e-07
G(79)	2.75197e-06	3.23761e-07	0	0	0	1.6188e-07	0	0	0	1.6188e-07	1.6188e-07	0	0	0	0	0	0	0	5.5525e-05
P(123)	1.6188e-07	1.6188e-07	0	0	0	0	4.04701e-06	0	1.6188e-07	0	1.0846e-05	0	0	0	0	3.94988e-05	3.88513e-06	0	1.6188e-07
G(126)	1.6188e-07	1.6188e-07	0	2.62246e-05	1.05222e-05	1.6188e-07	0	0	3.23761e-07	0	0	0	0	1.6188e-07	0	1.84544e-05	0	0	3.23761e-07
F(53)	0	0	0	0	1.6188e-07	0	0	0	0	6.47521e-07	2.75197e-05	0	0	0	0	2.46058e-05	0	8.09402e-07	6.47521e-07
N(43)	0	8.09402e-07	0	0	0	0	0	0	0	4.85641e-07	0	1.6188e-07	0	0	0	5.13161e-05	0	0	0
G(189)	1.6188e-07	1.6188e-06	0	2.26632e-06	1.81306e-05	0	0	0	0	0	0	0	0	0	0	1.63499e-05	0	0	1.29504e-05

## Sheet: Africa
	A	R	N	D	C	E	Q	G	H	I	L	K	M	F	P	S	T	W	Y	V
I(82)	3.09291e-05	0	0	0	0	0	0	0	0	0	0	0	0.000154646	0	0	0.00194853	0.462576	0	0	0.000216504
D(3)	3.09291e-05	0	0	0	0	0	0	0.0230422	0.000154646	0	0	0	0	0	0	0	0	0	9.27873e-05	0
A(63)	0	0	0	0	3.09291e-05	0	0	0	0	0	3.09291e-05	0	0	0	0	0.000123716	0.0224236	0	0	3.09291e-05
Q(19)	0	0	3.09291e-05	0	0	0.0219597	0	0	9.27873e-05	0	0	0	0	0	0	0	0	3.09291e-05	0	0
A(2)	0	0	0	0	0	0	0	0	0	0	0	0	0	0	0	0.00151553	6.18582e-05	0	0	0.00250526
M(109)	0	0	0	0	0	0	0	0	0	0.00154646	3.09291e-05	0	0	0	0	0.000154646	0	3.09291e-05	0	3.09291e-05
A(85)	0	0	0	0	3.09291e-05	0	0	0	0	0	0.000154646	0	0	0	0	0.00126809	0	0	0	0.000247433
L(87)	0	0	0	0	0	0	0	0.000154646	0	0.00117531	0	0	0	0.000185575	0	0	0	0	0	3.09291e-05
H(155)	0	0	0.000154646	0	0	0	0	0	0	0	0	0	0	0	0	0	0	0	0.00136088	0
V(70)	3.09291e-05	0.000154646	0	0	0	0	0	0	0	0.000123716	0.000618582	0	0	0.000525795	0	0	0	0	3.09291e-05	0
H(148)	0	6.18582e-05	9.27873e-05	6.18582e-05	0	0	0.000773228	6.18582e-05	0	0	0	0	0	0	3.09291e-05	0	0	0	0.000154646	0
N(121)	0	0	0	0	0	0	0	0	0	3.09291e-05	3.09291e-05	0.00111345	0	0	0	0	0	0	0	3.09291e-05
I(48)	0	0	0	0	3.09291e-05	0	0	0	0	0	0.000278362	0	0	0	0	0	0.000866015	0	0	0
L(29)	0	0	0	0	0	0	0	0	0	3.09291e-05	0	0	0	0.000927873	0.000154646	0	3.09291e-05	0	0	0
F(28)	0	0	0	0	0	0	0	0	0	0	0.00114438	0	0	0	0	0	0	0	0	0
M(84)	3.09291e-05	0	0	0	0.000154646	0	0	0	0	0.000463937	3.09291e-05	0	0	0	0	0	6.18582e-05	0	0	0.00034022
D(209)	0	0	3.09291e-05	0	0	0	0	6.18582e-05	0	0	0	0	0	0	0	0	6.18582e-05	0	0.000896944	0
T(30)	0	0	0	0	0	0	0	0	0	0.000989732	0	0	0	0	0	0	0	3.09291e-05	0	0
W(75)	0	0	0	0	0	0	0	0	0	3.09291e-05	0.000773228	0	0	0	0	0	0.000154646	0	0	0
A(188)	0	0	0	0	0	0	0	0	0	0	0	0	0	0	0	0.000804157	6.18582e-05	0	0	6.18582e-05
H(125)	0	0	3.09291e-05	0	0	0	0	0	0	0	6.18582e-05	0	0	0	0	0	0	0	0.000835086	0
V(23)	3.09291e-05	0	0	0	0	0	0	0	0	3.09291e-05	0.00068044	0	0	0	0	0	0	0	0	0
A(69)	0	0	0	0	0	0	0	0	0	0	0	0	0	0	0	0.000402078	0	0	0.000154646	0.000154646
C(86)	0	0	0	0	0	0	0	0	0	0	3.09291e-05	0	0	0.000494866	0	0	0	0	0	0.000154646
A(98)	0	0	0	0	0	0	0	0	0	0	0	0	0	0.000154646	0	0.000433008	0	0	0	6.18582e-05
R(158)	0	0	0	0	6.18582e-05	0	0	6.18582e-05	9.27873e-05	0	0.000371149	0	0	0	0	0	0	0	0	0
S(136)	0	0	0.000463937	0	0	6.18582e-05	0	3.09291e-05	0	0	0	0	0	0	0	0	0	0	0	0
T(175)	0	6.18582e-05	0	0	0	0	0	0	0	0	0	0	0.000463937	0	0	0	0	0	0	0
C(33)	0	0	0	0	0	0	0	0	0	3.09291e-05	3.09291e-05	0	0	9.27873e-05	0	0.000371149	0	0	0	0
Q(185)	0	0	0	0	0	0	0	0	9.27873e-05	0	0.000309291	0	0	0	0	6.18582e-05	0	0	0	0
V(66)	0.000154646	0	0	0	0	0	0	6.18582e-05	0	0	0.000185575	0	6.18582e-05	0	0	0	0	0	0	0
G(202)	0	0.000309291	0	0	0	0	0	0	0	3.09291e-05	0	0	0	0	0	0	3.09291e-05	0	3.09291e-05	3.09291e-05
C(64)	3.09291e-05	0	0	0	0	0	0	0	0	0	0	0	0	3.09291e-05	0	0.000216504	0	0.000154646	0	0
K(162)	0	0	0.000278362	0	0	0	0	0	0	6.18582e-05	0	0	6.18582e-05	0	0	0	0	0	0	0
G(182)	0	0	0	0	0	0.000309291	0	0	0	0	6.18582e-05	0	0	0	0	0	0	0	0	0
L(90)	0	0	0	0	0	0	0	0	0	0	0	0	3.09291e-05	0.000185575	0	0	0	0.000154646	0	0
I(76)	0	0	0	0	0	0	0	0.000154646	0	0	0	0	0	0	0	0	6.18582e-05	0	0	0.000154646
L(133)	0	0	0	0	0	0	0	0.000216504	0	0	0	0	0	0	6.18582e-05	0	0	0	0	9.27873e-05
L(93)	0	0	0	0	0	0	0	0	0	0	0	0	0	0.000185575	0	3.09291e-05	0	0	0.000154646	0
G(189)	3.09291e-05	0.000309291	0	0	0	0	0	0	0	0	0	0	0	0	0	3.09291e-05	0	0	0	0
R(186)	0	0	0	0	3.09291e-05	0	6.18582e-05	0.000247433	0	0	0	0	0	0	0	0	0	0	0	0
F(100)	0	3.09291e-05	0	0	0	0	0	0	0	0	0.000309291	0	0	0	0	0	0	0	0	0
D(190)	0	3.09291e-05	0	0	0	0.000278362	0	3.09291e-05	0	0	0	0	0	0	0	0	0	0	0	0
P(59)	0	0.000247433	0	0	0	0	0	0	0	0	0	0	0	0	0	0	0	3.09291e-05	0	3.09291e-05
R(72)	0	0	0.000154646	0	0	0	0	0	0	6.18582e-05	0	6.18582e-05	0	0	0	0	3.09291e-05	0	0	0
A(38)	0	0	0	0	3.09291e-05	0	0	0	0	0	0	0	0	3.09291e-05	0	0.000216504	0	0	3.09291e-05	0
T(77)	0	0	0	0	0	0	0	0.000185575	0	0.000123716	0	0	0	0	0	0	0	0	0	0
I(97)	3.09291e-05	0	0	0	0	0	0	0	0	0	0	0	0	3.09291e-05	0	0.000154646	0	0	0	9.27873e-05
S(214)	0	0	0	0	0	0	0	0.000185575	0	0.000123716	0	0	0	0	0	0	0	0	0	0
S(191)	0	0	0	6.18582e-05	0	0	0	0	0	0	0.000247433	0	0	0	0	0	0	0	0	0
A(104)	0	3.09291e-05	0	0	0	0	0	0	0	0	0	0	0	0	0	6.18582e-05	0.000154646	0	0	6.18582e-05
G(78)	0	0	0	0	3.09291e-05	0	0	0	0	0.000154646	0	0	0	0	0	9.27873e-05	0	0	0	0
I(52)	0	0	0	0	0	0	0	0	0	0	9.27873e-05	0	0	3.09291e-05	0	0	9.27873e-05	0	0	6.18582e-05
V(60)	6.18582e-05	3.09291e-05	0	0	0	0	0	0.000154646	0	0	0	0	0	0	0	0	3.09291e-05	0	0	0
H(210)	0	0	0	6.18582e-05	0	0	0.000154646	0	0	0	0	0	0	0	3.09291e-05	0	0	0	3.09291e-05	0
L(46)	0	0	0	0	0	0	0	0	0	0	0	0	0	0.000247433	0	0	0	0	3.09291e-05	0
N(41)	3.09291e-05	3.09291e-05	0	0	0	0	0	0	0	0	0	0	0	0	0	0	3.09291e-05	0	0.000185575	0
A(68)	0	0	0	0	0	0	0	0	0	0	0	0	0	0	0	0.000123716	0	0	0	0.000154646
N(74)	0	0	0	0	0	0	0	0	0	0.000154646	0	3.09291e-05	0	0	0	6.18582e-05	0	3.09291e-05	0	0
K(180)	0	0.000185575	0	0	0	0	0	0	0	0	0	0	0	0	0	0	0	0	6.18582e-05	0
I(73)	0	0	3.09291e-05	0	0	0	0	0	0	0	3.09291e-05	0	0	0	0	0	0	0.000154646	0	3.09291e-05
V(10)	9.27873e-05	0	0	0	0	3.09291e-05	0	0	0	0.000123716	0	0	0	0	0	0	0	0	0	0
S(94)	0	0	0	0	0	0	0	0	0	3.09291e-05	0	0	0	0.000154646	0	0	3.09291e-05	0	3.09291e-05	0
I(80)	3.09291e-05	0	0	0	0	0	0	0	0	0	3.09291e-05	0	0	0	0	0	0.000185575	0	0	0
R(101)	0	0	0	0	0	0	0	0	0	0	3.09291e-05	3.09291e-05	0	0.000154646	0	0	0	0	0	0
R(107)	0	0	0	0	0	0	0	0	3.09291e-05	0	0	0	0.000154646	0	0	3.09291e-05	0	0	0	0
L(17)	0	0	0	0	0	3.09291e-05	3.09291e-05	0	0	0	0	0	0	0.000154646	0	0	0	0	0	0
F(112)	0	0	3.09291e-05	0	0	0	0	0	0	0	0	0	0	0	0.000154646	3.09291e-05	0	0	0	0
F(103)	3.09291e-05	0.000154646	0	0	0	0	0	0	0	0	3.09291e-05	0	0	0	0	0	0	0	0	0
E(135)	0	0	0	0.000154646	0	0	0	0	0	0	6.18582e-05	0	0	0	0	0	0	0	0	0
F(65)	0	0	0	0	3.09291e-05	0	0	0	0	0	0.000154646	0	0	0	0	0	0	0	0	3.09291e-05
W(92)	0	0	0	0	3.09291e-05	0	0	0	0	0	3.09291e-05	0	0	0	0	0.000154646	0	0	0	0
M(91)	0	0	0	0	0	0	0	0	0	3.09291e-05	0.000154646	0	0	0	0	0	0	3.09291e-05	0	0
N(207)	0	0	0	0	0	0	0	0	6.18582e-05	0	6.18582e-05	3.09291e-05	0	0	0	6.18582e-05	0	0	0	0
Y(71)	0	3.09291e-05	0	0	0	0	0	0	0	0.000154646	0	0	0	0	0	0	0	0	0	3.09291e-05
I(201)	0	6.18582e-05	0	0	0	0	0	0	0	0	0	0	0	0	0	0	0.000154646	0	0	0
S(173)	0	0	0	0	0	0	0	0	0	0	0	0.000154646	0	0	0	0	6.18582e-05	0	0	0
Y(95)	0	0	0	0	0	0	0	0	0	0.000154646	0	0	0	3.09291e-05	0	0	0	0	0	0
S(108)	0	0	0	0	0	0	0	0	0	0	0	0	3.09291e-05	0	0	0	0	0.000154646	0	0
P(114)	0	0	0	0	0	3.09291e-05	0	0	0	0	0	0	0	0	0	0	0.000154646	0	0	0
N(113)	0	0	0	0	0	0.000154646	0	0	0	0	0	0	0	0	3.09291e-05	0	0	0	0	0
L(67)	0.000185575	0	0	0	0	0	0	0	0	0	0	0	0	0	0	0	0	0	0	0
W(110)	0	0	0	0	0	0	0	0	0	0	0	0	0	0.000154646	0	3.09291e-05	0	0	0	0
K(15)	0	3.09291e-05	0.000123716	0	0	0	0	0	0	0	3.09291e-05	0	0	0	0	0	0	0	0	0
T(106)	0	3.09291e-05	0	0	0	0	0	0	0	0	0	0	0	0	0	0.000154646	0	0	0	0
G(79)	0.000154646	0	0	0	0	0	0	0	0	3.09291e-05	0	0	0	0	0	0	0	0	0	0
F(96)	0.000154646	0	0	0	0	0	0	0	0	3.09291e-05	0	0	0	0	0	0	0	0	0	0
A(81)	0	0	0	0	0	0	0	0	0	3.09291e-05	0	0	0	0	0	0.000154646	0	0	0	0
A(83)	0	0	0	0	0	3.09291e-05	0	0	0	0	0	0	3.09291e-05	0	0	0.000123716	0	0	0	0
L(102)	0.000154646	0	0	0	0	0	0	0	0	0	0	0	0	3.09291e-05	0	0	0	0	0	0
V(88)	0	0	0	0	0	0	0	3.09291e-05	0	0	0.000154646	0	0	0	0	0	0	0	0	0
G(89)	0	0	0	0	0	0	0	0	0	0	3.09291e-05	0	0.000154646	0	0	0	0	0	0	0
S(99)	0	0.000154646	0	0	0	0	0	0	0	0	0	0	0	3.09291e-05	0	0	0	0	0	0
S(111)	0	0	0.000154646	0	0	0	0	0	0	0	0	0	0	3.09291e-05	0	0	0	0	0	0
E(115)	0	0	0	0	0	0	0	0	0	0	0	0.000154646	0	0	0	0	3.09291e-05	0	0	0
I(128)	0	0	0	0	0	0	0	0	0	0	0	0	0	0	0	9.27873e-05	9.27873e-05	0	0	0
T(208)	0	0	6.18582e-05	0	0	0	0	0	0	0.000123716	0	0	0	0	0	0	0	0	0	0
A(142)	0	0	0	0	0	0	0	6.18582e-05	0	0	0	0	0	0	0	0	0	0	0	0.000123716
R(146)	0	0	0	0	0	0	0	0	0.000123716	0	6.18582e-05	0	0	0	0	0	0	0	0	0
A(194)	0	0	0	0	0	0	0	0	0	0	0	0	0	6.18582e-05	0	3.09291e-05	0	0	0	9.27873e-05

## Sheet: Asia
	A	R	N	D	C	E	Q	G	H	I	L	K	M	F	P	S	T	Y	V
I(82)	2.8326e-05	0	0	0	0	0	0	0	0	0	0	0	0	2.17892e-06	0	0.00653242	0.590776	0	1.96103e-05
F(28)	0	0	0	0	0	0	0	0	0	2.17892e-06	0.0200592	0	0	0	0	1.08946e-05	0	0	0
D(3)	1.08946e-05	0	7.84413e-05	0	0	4.35785e-06	0	0.00483939	7.19045e-05	2.17892e-06	0	0	0	0	0	0	0	0.00014163	1.30735e-05
Q(19)	0	2.17892e-05	0	0	0	0.00497448	0	0	4.79363e-05	0	0	0	0	0	2.17892e-06	0	0	0	0
A(63)	0	0	0	2.17892e-06	0	0	0	0	0	0	0	0	0	0	0	8.49781e-05	0.00482196	0	5.01153e-05
A(2)	0	0	0	0	0	8.7157e-06	0	4.35785e-06	0	0	0	0	0	0	8.7157e-06	0.00110689	0.000503332	0	0.000991411
V(70)	3.26839e-05	0	0	0	0	0	0	0	0	0.00093258	0.000531658	0	0	0.000644962	0	0	0	0	0
L(34)	0	0	0	0	6.53677e-06	0	0	0	0	2.17892e-06	0	0	0	0.00194578	0	0	0	0	0
T(30)	0	0	0	0	0	0	0	0	0	0.00138362	0	2.17892e-06	0	0	0	4.35785e-06	0	0	0
D(209)	4.35785e-06	0	5.01153e-05	0	0	8.7157e-06	0	6.53677e-06	7.62624e-05	0	0	0	0	0	0	0	0	0.00100231	2.17892e-06
H(125)	0	2.8326e-05	1.30735e-05	2.17892e-06	0	0	1.52525e-05	0	0	0	8.7157e-06	0	0	0	0	0	0	0.00107203	0
H(155)	0	1.96103e-05	6.53677e-06	0	0	0	4.35785e-06	0	0	0	2.17892e-06	0	0	0	0	0	0	0.00109818	0
M(109)	0	0	0	0	0	0	0	0	0	0.00103935	3.92206e-05	0	0	0	0	0	1.74314e-05	0	3.26839e-05
A(69)	0	0	0	0	0	0	0	1.30735e-05	0	0	0	0	0	0	0	0.000764803	2.39682e-05	0	0.000248397
V(23)	1.30735e-05	0	0	0	0	0	0	0	0	1.08946e-05	0.000819276	0	0	0	0	0	0	0	0
L(29)	0	0	0	0	0	0	0	0	0	6.53677e-06	0	0	0	0.000675467	2.17892e-06	0	0	0	4.35785e-06
A(81)	0	0	0	0	0	0	0	0	0	0	0	0	0	0	0	0.000658035	0	0	0
V(66)	6.53677e-06	0	0	0	0	0	0	2.17892e-06	0	0	0.000625351	0	1.96103e-05	0	0	0	0	0	0
T(208)	6.53677e-06	0	0	0	0	0	0	0	0	0.000577415	0	1.74314e-05	0	0	0	1.30735e-05	0	0	0
M(84)	0	0	0	0	0	0	0	0	0	0.000137272	3.48628e-05	0	0	0	0	0	0.000390027	0	1.74314e-05
I(76)	0	0	0	0	0	0	0	0	0	0	1.08946e-05	0	6.53677e-06	6.53677e-06	0	2.17892e-06	4.57574e-05	0	0.000431427
A(85)	0	0	0	2.17892e-06	0	0	0	0	0	0	0	0	0	0	0	0.000281081	2.17892e-06	0	0.000172135
H(148)	0	3.70417e-05	0	0	0	0	0.000335554	0	0	0	4.35785e-06	0	0	0	0	0	0	8.06202e-05	0
S(4)	2.17892e-06	0	0	0	0	0	0	0	0	0	0	0	0	0.00032466	0.000111125	0	0	4.35785e-06	0
T(7)	2.17892e-06	0	1.30735e-05	0	0	0	0	0	0	0.000348628	0	0	0	0	0	0	0	0	0
R(146)	0	0	0	0	4.35785e-06	0	0	0	0.000307228	0	1.52525e-05	0	0	2.17892e-06	0	0	0	2.17892e-06	0
K(15)	0	3.05049e-05	0.000128557	0	0	0.000124199	6.53677e-06	0	0	0	2.17892e-06	0	2.39682e-05	0	0	0	0	0	0
G(78)	2.17892e-06	0	0	6.53677e-06	0.000167777	0	0	0	0	0	0	0	0	0	0	0.000119841	0	0	1.74314e-05
T(175)	0	0	0	0	0	0	0	0	0	0	0	6.53677e-06	0.000302871	0	0	0	0	0	0
I(201)	0	0	0	0	0	0	0	0	0	0	0	0	0	2.17892e-06	0	0	2.17892e-06	0	0.000305049
R(107)	0	0	0	0	2.17892e-06	0	0	2.17892e-06	0.000209177	0	7.40834e-05	0	0	0	0	4.35785e-06	0	0	0
L(17)	0	0	0	0	0	0	0	0	0	1.52525e-05	0	0	0	0.000257113	2.17892e-06	2.17892e-06	0	0	6.53677e-06
I(73)	0	0	0	0	0	0	0	0	0	0	3.05049e-05	0	0.000224429	0	0	0	0	0	1.96103e-05
A(40)	0	0	0	2.17892e-06	0	0	0	0	0	0	0	0	0	0	0	0.000246218	2.17892e-06	6.53677e-06	1.52525e-05
C(33)	0	0	0	0	0	0	0	0	0	0	2.39682e-05	0	0	0.000178672	0	4.13996e-05	0	2.17892e-06	0
S(94)	0	0	8.7157e-06	0	4.35785e-06	0	0	0.000167777	0	3.92206e-05	0	0	0	0	0	0	2.39682e-05	0	0
V(10)	6.31888e-05	0	0	0	0	0	0	2.17892e-06	0	0.00016124	0	0	0	1.52525e-05	0	0	0	0	0
C(86)	0	0	0	0	0	0	0	0	0	0	0	0	0	0.000206998	0	8.7157e-06	0	2.17892e-06	0
R(158)	0	0	0	0	5.8831e-05	0	0	0	3.48628e-05	0	0.000117662	0	0	0	2.17892e-06	4.35785e-06	0	0	0
Q(185)	0	2.17892e-06	0	0	0	0	0	0	0.000209177	0	4.35785e-06	2.17892e-06	0	0	0	0	0	0	0
K(162)	0	2.17892e-06	0.000193924	0	0	6.53677e-06	0	0	0	0	0	0	0	0	0	0	0	0	0
S(214)	0	3.26839e-05	8.7157e-06	0	2.17892e-06	0	0	8.7157e-06	0	0.000145988	0	0	0	0	0	0	2.17892e-06	0	0
I(52)	0	0	2.17892e-06	0	0	0	0	0	0	0	2.17892e-05	0	1.52525e-05	6.75467e-05	0	1.08946e-05	6.53677e-05	0	1.74314e-05
A(98)	0	0	0	2.17892e-06	0	0	0	0	0	0	0	0	0	0	0	0.000143809	1.30735e-05	0	3.48628e-05
A(104)	0	0	0	0	0	0	0	0	0	0	0	0	0	0	0	4.35785e-06	0	0	0.000185209
C(64)	0	0	0	0	0	0	0	0	0	0	0	0	0	0.000167777	0	1.08946e-05	0	6.53677e-06	0
T(127)	2.61471e-05	0	0.000108946	0	0	0	0	0	0	3.05049e-05	0	0	0	0	0	1.52525e-05	0	0	0
G(79)	8.7157e-06	0	0	0	0	0	0	0	0	0	0	0	0	0	0	0	0	0	0.000172135
G(6)	2.17892e-06	0	0	3.70417e-05	2.17892e-05	0	0	0	0	0	0	0	0	0	0	5.6652e-05	0	0	6.31888e-05
I(128)	0	0	0	0	0	0	0	0	0	0	0	0	0	0	0	2.17892e-06	5.6652e-05	0	0.000119841
L(46)	0	0	0	0	0	0	0	0	0	0	0	0	0	0.000176493	0	0	0	0	0
L(124)	0	2.17892e-06	0	0	0	0	0	0	0	3.26839e-05	0	0	0	0.000132914	0	0	0	0	6.53677e-06
S(136)	0	0	0.000135093	0	0	0	0	1.30735e-05	0	1.08946e-05	0	0	0	0	0	0	4.35785e-06	0	0
T(77)	3.05049e-05	0	1.08946e-05	0	0	0	0	0	0	0.000104588	0	0	0	0	0	1.74314e-05	0	0	0
M(1)	0	0	0	0	0	0	0	0	0	0.000156883	0	0	0	0	0	0	4.35785e-06	0	0
W(75)	0	6.53677e-06	0	0	8.7157e-06	0	0	0	0	0	0.000126378	0	0	0	0	8.7157e-06	0	0	0
E(167)	1.30735e-05	0	0	1.74314e-05	0	0	0.000106767	0	0	0	0	8.7157e-06	0	0	0	0	0	0	0
I(97)	0	2.17892e-06	0	0	0	0	0	0	0	0	2.17892e-06	0	8.7157e-06	2.17892e-05	0	1.74314e-05	8.7157e-06	0	8.49781e-05
A(68)	0	0	0	0	0	0	0	0	0	0	0	0	0	0	0	0.000139451	0	0	0
N(43)	0	6.53677e-06	0	0	0	0	0	0	0	0	0	0	0	0	0	0.000132914	0	0	0
A(142)	0	0	0	2.17892e-06	0	0	0	0	0	2.17892e-06	0	0	0	0	0	6.53677e-06	0	0	0.000124199
S(212)	0	6.53677e-06	5.8831e-05	0	1.96103e-05	0	0	1.96103e-05	0	1.96103e-05	0	0	0	0	0	0	0	0	0
A(83)	0	0	0	0	0	2.17892e-06	0	0	0	0	0	0	0	0	0	3.26839e-05	8.7157e-05	0	2.17892e-06
K(166)	0	0.000113304	6.53677e-06	0	0	0	0	0	0	0	0	0	0	0	0	0	0	0	0
A(188)	0	0	0	0	0	2.17892e-06	0	0	0	0	0	0	0	0	0	0.000108946	8.7157e-06	0	0
A(38)	0	0	0	0	0	0	0	0	0	0	0	0	0	6.53677e-06	0	0.000104588	0	2.17892e-06	4.35785e-06
I(168)	0	1.30735e-05	0	0	0	0	0	0	0	0	6.53677e-06	0	4.35785e-06	4.35785e-06	0	0	0	0	8.49781e-05
V(60)	0	0	0	0	0	0	0	0	0	4.35785e-06	9.80516e-05	0	0	0	0	0	0	0	0
L(87)	0	0	0	0	0	0	0	0	0	1.08946e-05	0	0	0	8.49781e-05	0	0	0	0	0
F(100)	0	0	0	0	0	0	0	0	0	4.13996e-05	3.70417e-05	0	0	0	0	1.30735e-05	0	0	4.35785e-06
D(160)	6.53677e-06	0	2.17892e-06	0	0	8.7157e-06	0	1.08946e-05	0	0	0	0	0	0	0	0	0	6.31888e-05	0
M(91)	0	0	0	0	0	0	0	0	0	1.74314e-05	5.6652e-05	0	0	0	0	0	2.17892e-06	0	1.30735e-05
E(12)	2.17892e-06	0	0	7.40834e-05	0	0	6.53677e-06	0	0	0	0	2.17892e-06	0	0	0	0	0	0	0
S(197)	0	0	4.13996e-05	0	0	0	0	0	0	1.96103e-05	0	0	0	0	0	0	1.30735e-05	0	0
G(89)	2.17892e-06	0	0	0	3.92206e-05	0	0	0	0	0	0	0	0	0	0	3.05049e-05	0	0	0
W(55)	0	0	0	0	1.30735e-05	0	0	2.17892e-06	0	0	5.44731e-05	0	0	0	0	0	0	0	0
W(31)	0	0	0	0	2.61471e-05	0	0	0	0	0	4.35785e-05	0	0	0	0	0	0	0	0
I(151)	0	0	0	0	0	0	0	0	0	0	0	0	2.17892e-06	0	0	0	0	0	6.75467e-05
I(144)	0	2.17892e-06	0	0	0	0	0	0	0	0	2.17892e-06	0	2.17892e-06	0	0	0	2.17892e-06	0	5.44731e-05
I(48)	0	0	0	0	0	0	0	0	0	0	0	0	1.52525e-05	0	0	0	0	6.53677e-06	4.13996e-05
E(11)	6.53677e-06	0	0	2.39682e-05	0	0	2.17892e-06	1.08946e-05	0	0	0	1.08946e-05	0	0	0	0	0	0	2.17892e-06
R(44)	0	0	6.53677e-06	0	0	0	0	0	0	0	0	1.52525e-05	1.74314e-05	0	0	1.74314e-05	0	0	0
V(88)	0	0	0	0	0	0	0	0	0	2.39682e-05	3.05049e-05	0	0	0	0	0	0	0	0
L(93)	0	0	0	0	0	0	0	0	0	3.48628e-05	0	0	0	1.74314e-05	0	0	0	0	0
P(132)	0	0	0	0	0	0	0	0	0	0	0	0	0	0	0	5.22942e-05	0	0	0
P(123)	0	0	0	0	0	0	1.30735e-05	0	0	0	2.17892e-06	0	0	0	0	2.8326e-05	6.53677e-06	0	0
R(105)	0	0	0	0	1.52525e-05	0	0	3.48628e-05	0	0	0	0	0	0	0	0	0	0	0
I(80)	0	0	0	0	0	0	0	0	0	0	8.7157e-06	0	0	6.53677e-06	0	0	2.17892e-06	0	3.05049e-05
I(24)	0	0	0	0	0	0	0	0	0	0	1.30735e-05	0	4.35785e-06	0	0	2.17892e-06	1.52525e-05	0	1.30735e-05
S(173)	8.7157e-06	0	0	0	0	0	0	0	0	0	2.17892e-06	3.26839e-05	0	0	0	0	2.17892e-06	0	0
I(49)	0	0	0	0	0	0	0	0	0	0	2.17892e-06	0	0	6.53677e-06	0	0	4.35785e-06	0	3.26839e-05
D(190)	0	0	8.7157e-06	0	0	3.26839e-05	0	0	2.17892e-06	0	0	0	0	0	0	0	0	2.17892e-06	0
H(210)	0	2.8326e-05	0	0	0	0	2.17892e-06	0	0	0	4.35785e-06	0	0	0	2.17892e-06	0	0	8.7157e-06	0
R(174)	0	0	0	0	0	0	2.39682e-05	0	0	0	1.96103e-05	0	0	0	0	0	0	0	0
R(186)	0	0	0	0	3.05049e-05	0	0	0	8.7157e-06	0	2.17892e-06	0	0	0	0	0	0	0	0
D(215)	0	0	4.35785e-06	0	0	4.35785e-06	0	2.17892e-06	2.17892e-06	0	0	0	0	0	0	0	0	2.61471e-05	0
I(161)	0	0	0	0	0	0	0	0	0	0	0	0	2.17892e-06	6.53677e-06	0	0	4.35785e-06	0	2.61471e-05
L(90)	0	0	0	0	0	0	0	0	0	0	0	0	4.35785e-06	3.05049e-05	0	2.17892e-06	0	0	0
I(8)	0	0	0	0	0	0	0	0	0	0	2.17892e-06	0	0	2.17892e-06	0	1.52525e-05	8.7157e-06	0	8.7157e-06
G(126)	0	0	0	2.39682e-05	0	0	0	0	0	0	0	0	0	0	0	1.08946e-05	0	0	0

## Sheet: Europe
	A	R	N	D	C	E	Q	G	H	I	L	K	M	F	P	S	T	Y	V
I(82)	1.44644e-05	0	2.95863e-06	0	0	0	0	0	0	0	8.87588e-06	0	0	3.28736e-07	0.000726178	0.000290603	0.603509	0	1.2492e-05
D(3)	5.58852e-06	0	2.43265e-05	0	0	5.91725e-06	0	0.0097158	7.69243e-05	0	0	0	0	0	0	6.57472e-07	0	0.000152862	1.05196e-05
A(63)	0	3.28736e-07	3.28736e-07	9.86209e-07	0	0	0	3.28736e-07	0	0	0	0	0	3.28736e-07	0	0.000294219	0.00918292	0	0.000193297
Q(19)	0	5.81863e-05	0	0	0	0.00910501	0	0	1.84092e-05	0	0	2.62989e-06	0	0	0	0	0	0	0
A(2)	0	0	0	0	0	4.93104e-06	0	6.57472e-07	0	0	6.57472e-07	0	0	0	3.64897e-05	0.00491756	4.01058e-05	0	0.00106938
V(70)	1.97242e-05	0	0	0	0	0	0	3.28736e-07	0	5.95012e-05	0.00309111	0	0	0.00059041	0	0	0	0	0
H(125)	0	5.02966e-05	1.21632e-05	4.60231e-06	3.28736e-07	0	1.15058e-05	0	0	0	1.08483e-05	0	0	0	0	3.28736e-07	0	0.00156774	0
F(28)	0	0	0	0	9.86209e-07	0	0	0	0	0	0.00150726	0	0	0	0	6.57472e-07	0	0	6.57472e-07
S(94)	0	1.31494e-06	8.54714e-06	0	7.88967e-06	0	0	0.00123966	0	7.88967e-05	0	0	0	0	0	0	0.000115058	0	0
A(81)	0	0	0	0	0	0	0	9.86209e-07	0	0	0	0	0	0	3.28736e-07	0.0012446	6.57472e-07	0	0
S(212)	0	2.30115e-06	0.00012229	0	1.90667e-05	0	0	0.000840578	0	0.000112428	0	0	0	0	0	0	4.93104e-06	0	0
A(69)	0	0	0	6.57472e-07	0	0	0	5.25978e-06	0	0	0	0	0	3.28736e-07	1.64368e-06	0.000852084	1.38069e-05	0	0.000177189
V(23)	2.30115e-05	0	0	0	0	0	0	3.28736e-07	0	0.000132152	0.000867535	0	0	0	0	0	0	0	0
D(209)	1.31494e-06	0	2.56414e-05	0	0	9.86209e-06	0	1.80805e-05	0.000103223	0	0	0	0	0	0	0	0	0.000857344	1.97242e-06
A(98)	0	0	0	3.28736e-06	0	0	0	1.31494e-06	0	0	0	6.57472e-07	0	0	0	0.000630516	0.000166669	0	6.83771e-05
M(109)	0	0	0	0	0	0	0	0	0	0.000537484	7.79105e-05	0	0	0	0	0	6.4761e-05	0	5.72001e-05
T(175)	1.31494e-06	3.28736e-07	0	0	0	0	0	0	0	0	0	6.24599e-06	0.000646624	0	0	0	0	0	0
A(104)	0	0	0	0	0	0	0	0	0	0	0	6.57472e-07	0	0	0	4.93104e-06	2.30115e-06	0	0.000621969
L(17)	0	0	0	0	0	0	0	0	0	0.000241292	0	0	0	0.000337612	0	0	0	0	5.25978e-06
L(34)	0	3.28736e-07	0	0	0	0	0	0	0	9.20461e-06	0	0	0	0.000571672	0	0	0	0	6.57472e-07
H(155)	0	8.54714e-06	2.16966e-05	3.28736e-07	0	0	1.64368e-06	0	0	0	5.25978e-06	0	0	0	9.20461e-06	0	0	0.000523677	0
L(29)	0	0	0	0	0	0	0	0	3.28736e-07	6.24599e-06	0	0	0	0.000542415	0	0	0	0	2.62989e-06
V(10)	0.000396785	0	0	0	0	0	0	9.86209e-07	0	0.000127878	0	0	0	1.8738e-05	0	0	0	0	0
A(85)	0	0	0	5.25978e-06	0	0	0	1.97242e-06	0	0	0	0	0	0	0	0.000218938	1.1177e-05	0	0.000292904
I(76)	0	0	6.57472e-07	0	0	0	0	0	0	0	4.27357e-06	0	2.30115e-06	4.60231e-06	0	1.31494e-05	9.00737e-05	0	0.000368842
L(87)	0	0	0	0	0	0	0	0	0	1.15058e-05	0	0	0	0.000458258	3.28736e-07	6.57472e-07	0	0	3.28736e-07
T(30)	4.60231e-06	0	0	0	0	0	0	0	0	0.000452998	0	0	0	0	0	2.30115e-06	0	0	0
T(208)	5.58852e-06	9.20461e-06	0	0	0	0	0	0	0	0.000351419	0	2.62989e-05	0	0	2.95863e-06	1.2492e-05	0	0	0
K(180)	0	0.000400401	0	0	0	0	0	0	0	0	0	0	0	0	0	0	0	0	0
W(75)	0	1.64368e-05	0	0	2.62989e-06	0	0	3.28736e-07	0	0	0.000359637	0	0	1.31494e-06	0	9.53335e-06	0	0	0
C(86)	0	0	0	0	0	0	0	3.28736e-07	0	9.86209e-07	0	0	0	0.000342214	0	4.07633e-05	0	3.28736e-07	0
R(158)	0	0	0	0	7.59381e-05	0	0	0	4.8653e-05	0	0.00022617	0	0	0	3.28736e-07	9.86209e-06	0	0	0
Q(185)	0	6.90346e-06	0	0	0	0	0	0	0.000349118	0	1.97242e-06	9.86209e-07	0	0	0	0	0	0	0
S(4)	9.86209e-06	0	0	0	6.57472e-07	0	0	0	0	0	0	0	0	0.000326106	6.57472e-06	0	6.57472e-07	1.34782e-05	0
K(15)	0	7.62668e-05	0.000238991	0	0	2.26828e-05	5.91725e-06	0	0	0	0	0	6.57472e-06	0	0	0	4.93104e-06	0	0
S(136)	0	0	0.000300465	0	7.88967e-06	0	0	3.22161e-05	0	8.87588e-06	0	0	0	0	0	0	0	0	0
V(66)	1.51219e-05	0	0	0	0	0	0	2.62989e-06	0	0	0.000300465	0	2.69564e-05	3.28736e-07	0	0	0	0	0
G(6)	0	0	0	9.36898e-05	3.45173e-05	0	0	0	0	0	0	0	0	0	0	3.81334e-05	0	0	0.000172586
K(162)	0	5.25978e-06	0.000312628	0	0	3.28736e-06	6.57472e-07	0	0	0	0	0	6.90346e-06	0	0	0	4.27357e-06	0	0
R(107)	0	0	0	0	2.95863e-06	0	0	0	0.000272194	0	4.70093e-05	0	0	0	0	1.97242e-06	0	0	0
C(33)	0	0	0	0	0	0	0	3.28736e-07	0	0	6.57472e-07	0	0	0.000227485	0	7.85679e-05	0	0	0
M(84)	0	0	0	0	0	0	0	0	0	0.000149246	4.66805e-05	0	0	0	0	0	6.54185e-05	0	3.78047e-05
A(142)	0	0	0	0	0	0	0	6.57472e-07	0	0	0	0	0	0	0	1.28207e-05	0	0	0.000267263
S(214)	0	2.62989e-06	8.2184e-06	0	6.24599e-06	0	0	6.90346e-06	0	0.000223541	0	0	0	0	0	0	2.26828e-05	0	0
I(80)	0	0	0	0	0	0	0	0	0	0	2.30115e-05	0	9.86209e-07	4.43794e-05	0	8.87588e-06	3.18874e-05	0	0.000155492
V(60)	7.2322e-06	0	0	0	0	0	0	0	0	8.87588e-06	0.000225842	0	0	0	0	0	0	0	0
I(52)	0	0	0	0	0	0	0	0	0	0	2.95863e-06	0	3.28736e-07	8.2184e-06	0	1.97242e-06	0.000210391	0	1.41357e-05
T(7)	7.56093e-06	0	6.24599e-06	0	0	0	0	0	0	0.00021861	0	0	0	0	0	3.28736e-06	0	0	3.28736e-07
A(40)	0	0	0	0	0	0	0	0	0	0	0	0	0	0	4.27357e-06	0.000216308	3.28736e-07	0	5.25978e-06
A(83)	0	0	0	0	0	0	0	0	0	0	0	0	0	0	0	0.000104209	9.23749e-05	0	1.80805e-05
C(64)	0	3.28736e-07	0	0	0	0	0	3.28736e-07	0	0	0	0	0	0.00012755	0	7.42944e-05	0	1.64368e-06	0
G(78)	6.57472e-07	9.86209e-07	0	2.95863e-06	0.000127221	0	0	0	0	0	0	0	0	3.28736e-07	0	5.55564e-05	0	0	8.87588e-06
I(201)	0	0	0	0	0	0	0	0	0	0	3.28736e-07	0	0	0	0	0	6.57472e-06	0	0.000185407
L(46)	0	0	0	0	0	0	0	0	0	0	0	0	0	0.000190667	0	0	0	0	0
H(148)	0	2.20253e-05	3.28736e-06	1.31494e-06	0	0	1.97242e-05	3.28736e-07	0	0	2.95863e-06	0	0	0	0	0	0	0.000131823	0
N(207)	0	0	0	2.30115e-06	0	0	0	0	2.30115e-06	3.28736e-06	0	9.82921e-05	0	0	0	2.49839e-05	1.64368e-06	1.93954e-05	0
I(97)	0	0	0	0	0	0	0	0	0	0	3.28736e-07	6.57472e-07	2.62989e-06	4.01058e-05	0	9.86209e-07	6.6076e-05	0	4.07633e-05
R(146)	0	0	0	0	1.1177e-05	0	0	0	0.000126235	0	8.54714e-06	0	0	3.28736e-07	0	0	0	0	0
F(100)	0	0	0	0	3.94483e-05	0	0	0	0	6.57472e-07	8.90875e-05	6.57472e-07	0	0	0	1.34782e-05	0	0	3.28736e-07
E(167)	3.28736e-07	0	0	2.49839e-05	0	0	0.000111113	3.28736e-07	0	0	0	1.31494e-06	0	0	0	0	0	0	3.28736e-06
L(124)	0	9.86209e-07	0	0	0	0	0	0	0	2.46552e-05	0	0	0	0.000105524	6.57472e-07	0	0	0	7.56093e-06
A(68)	0	0	0	6.57472e-07	0	0	0	6.57472e-07	0	0	0	0	0	0	1.31494e-06	0.00012492	2.30115e-06	0	1.31494e-06
N(74)	0	0	0	1.93954e-05	0	0	0	0	1.31494e-06	0	0	0	0	0	0	1.51219e-05	9.33611e-05	1.97242e-06	0
G(89)	0	0	0	3.28736e-07	4.60231e-05	0	0	0	0	0	0	0	0	0	0	7.98829e-05	0	0	3.28736e-07
I(48)	0	3.28736e-07	0	0	0	0	0	0	0	0	9.20461e-06	0	1.64368e-06	0	0	0	1.01908e-05	0	9.92783e-05
L(138)	0	0	0	0	0	0	0	0	0	0.000104209	0	0	0	2.30115e-06	5.25978e-06	0	0	0	3.28736e-07
S(173)	4.27357e-06	0	0	0	0	0	6.57472e-07	0	0	0	3.28736e-07	8.74438e-05	0	0	9.53335e-06	0	6.90346e-06	0	0
A(188)	0	0	0	0	0	0	0	3.28736e-07	0	0	0	0	0	0	0	6.50898e-05	2.43265e-05	0	1.64368e-05
T(77)	1.28207e-05	0	4.27357e-06	0	0	0	0	0	0	8.41565e-05	0	0	0	0	0	2.95863e-06	0	0	0
E(11)	1.84092e-05	0	0	2.76138e-05	0	0	2.62989e-06	3.05725e-05	0	0	0	9.53335e-06	0	0	0	0	0	0	1.34782e-05
A(38)	0	0	0	0	0	0	0	0	0	0	0	0	0	0	3.28736e-07	0.000100922	3.28736e-07	0	3.28736e-07
L(129)	0	1.64368e-06	0	0	0	0	4.20782e-05	0	0	0	0	0	4.50369e-05	7.56093e-06	3.28736e-07	0	0	0	4.60231e-06
R(101)	0	0	0	0	0	0	0	3.28736e-07	0	0	0	9.96071e-05	0	0	0	0	3.28736e-07	0	0
V(88)	0	0	0	0	0	0	0	0	0	3.84621e-05	5.12828e-05	0	0	0	0	0	0	0	0
E(12)	1.97242e-06	0	0	7.75817e-05	0	0	9.86209e-07	3.28736e-06	0	0	0	1.97242e-06	0	0	0	0	0	0	9.86209e-07
M(91)	0	0	0	0	0	0	0	0	0	1.93954e-05	2.82713e-05	3.28736e-07	0	0	0	0	1.54506e-05	0	2.26828e-05
I(24)	0	0	0	0	0	0	0	0	0	0	1.34782e-05	3.28736e-07	3.94483e-06	0	0	0	1.8738e-05	0	4.7338e-05
S(197)	0	0	5.62139e-05	0	0	0	0	0	0	6.90346e-06	0	0	0	0	0	0	2.07104e-05	0	0
I(151)	0	0	0	0	0	0	0	0	0	0	0	0	9.86209e-07	0	0	0	0	0	8.28415e-05
F(53)	0	0	0	0	0	0	0	0	0	0	3.81334e-05	0	0	0	0	4.04345e-05	0	1.64368e-06	6.57472e-07
L(90)	0	0	0	0	0	0	0	0	0	0	0	0	3.28736e-07	5.62139e-05	3.28736e-07	1.84092e-05	0	0	3.28736e-06
I(73)	0	0	0	0	0	0	0	0	0	0	1.31494e-05	0	3.68185e-05	0	0	0	3.28736e-07	0	2.39977e-05
W(31)	0	3.28736e-07	0	0	5.75288e-05	0	0	6.57472e-07	0	0	1.34782e-05	0	0	0	0	0	0	0	3.28736e-07
I(128)	0	0	0	0	0	0	0	0	0	0	1.31494e-06	0	4.93104e-06	0	0	0	1.90667e-05	0	4.60231e-05
I(161)	0	0	0	0	0	0	0	0	0	0	1.64368e-06	0	3.28736e-06	3.94483e-06	0	3.28736e-07	2.30115e-06	0	5.72001e-05
L(16)	0	0	0	0	0	0	0	0	0	5.65426e-05	0	0	0	9.86209e-06	3.28736e-07	0	0	0	0
T(127)	2.00529e-05	0	1.18345e-05	3.28736e-07	0	0	0	0	0	2.79426e-05	0	0	0	0	0	4.27357e-06	0	0	0
L(67)	0	3.28736e-07	0	0	0	0	0	0	0	1.64368e-06	0	0	0	5.91725e-05	3.28736e-07	0	0	6.57472e-07	0
R(186)	0	0	0	0	4.60231e-05	0	0	0	1.1177e-05	0	2.30115e-06	0	0	0	3.28736e-07	1.31494e-06	0	0	0
I(144)	0	0	0	0	0	0	0	0	0	0	6.57472e-07	0	0	0	0	0	8.54714e-06	0	4.96392e-05
D(160)	1.97242e-06	0	1.97242e-06	0	0	5.58852e-06	0	1.97242e-06	9.86209e-07	0	0	0	0	0	0	0	0	4.40506e-05	3.28736e-07
R(44)	0	0	0	0	0	0	0	1.64368e-06	0	0	0	3.09012e-05	1.64368e-05	0	0	6.90346e-06	0	0	0
P(123)	0	0	0	0	0	0	3.28736e-06	0	3.28736e-07	0	1.38069e-05	0	0	0	0	3.51748e-05	3.28736e-06	0	0
R(174)	0	0	0	0	0	0	2.3669e-05	0	3.28736e-07	0	3.15587e-05	0	0	0	0	0	0	0	0
I(168)	0	0	0	0	0	0	0	0	0	0	3.15587e-05	0	0	1.97242e-06	0	0	0	0	2.07104e-05
L(93)	0	0	0	0	0	0	0	0	0	1.28207e-05	0	0	1.64368e-06	3.4846e-05	9.86209e-07	0	0	0	0
I(8)	0	0	6.57472e-07	0	0	0	0	0	0	0	6.24599e-06	0	0	8.2184e-06	0	2.95863e-06	1.47931e-05	0	1.57793e-05
I(49)	0	0	0	0	0	0	0	0	0	0	8.87588e-06	0	0	1.97242e-06	0	0	5.25978e-06	0	3.22161e-05
V(139)	3.28736e-07	0	0	0	0	0	0	3.28736e-07	0	4.47081e-05	2.95863e-06	0	0	0	0	0	0	0	0
G(126)	0	0	0	2.46552e-05	1.28207e-05	0	0	0	0	0	0	0	0	0	0	1.05196e-05	0	0	0

## Sheet: North America
	A	R	N	D	C	E	Q	G	H	I	L	K	M	F	P	S	T	Y	V
I(82)	8.39537e-05	0	1.27203e-06	0	0	0	0	0	0	0	0	0	1.27203e-06	0	1.86564e-05	0.000369736	0.621624	0	4.6217e-05
A(81)	0	0	0	4.24009e-07	0	0	0	0	0	0	0	0	0	0	4.24009e-07	0.00832287	0	0	4.24009e-07
S(197)	0	2.54405e-06	0.00692321	0	0	0	0	4.24009e-07	0	6.78414e-06	0	0	0	0	0	0	1.31443e-05	2.54405e-06	0
T(30)	1.95044e-05	0	0	0	0	0	0	0	0	0.00578814	0	4.24009e-07	0	0	0	8.48017e-07	0	0	0
D(3)	7.63216e-06	0	3.73128e-05	0	0	1.22963e-05	0	0.00528569	0.000103034	0	0	0	0	0	0	0	0	0.000146283	1.78084e-05
V(70)	5.55451e-05	0	0	0	0	0	0	0	0	0.000186988	0.00406582	0	0	0.00113974	0	0	0	0	0
A(63)	0	0	0	1.27203e-06	0	0	0	0	0	0	0	0	0	0	0	0.000188684	0.00493716	0	5.17291e-05
Q(19)	0	1.69603e-05	0	0	0	0.00483328	0	0	6.44493e-05	0	4.24009e-07	4.6641e-06	0	0	8.48017e-07	0	0	4.24009e-07	0
A(2)	0	0	0	0	0	4.24009e-06	0	4.24009e-07	0	0	7.63216e-06	0	0	0	1.01762e-05	0.00179313	0.000413409	0	0.00185037
F(28)	0	0	0	0	0	0	0	0	0	0	0.00260596	0	0	0	4.24009e-07	2.54405e-06	0	4.24009e-07	1.27203e-06
L(29)	0	4.24009e-07	0	0	0	0	0	0	0	6.78414e-06	0	0	0	0.00186649	4.24009e-07	0	0	0	4.6641e-06
D(209)	8.48017e-07	0	0.000110666	0	0	1.01762e-05	0	4.32489e-05	6.36013e-05	8.48017e-07	0	0	0	0	0	0	0	0.00143866	2.12004e-06
H(125)	0	5.76652e-05	8.69218e-05	6.78414e-06	0	0	1.14482e-05	0	0	0	3.39207e-05	0	0	0	0	0	0	0.00146961	0
G(89)	0	0	0	1.01762e-05	2.88326e-05	0	0	0	0	0	0	0	0	0	0	0.00133817	0	0	4.24009e-07
A(85)	0	0	0	4.6641e-06	0	0	0	0	0	0	0	0	0	0	0	0.000920947	2.07764e-05	0	0.000356167
H(155)	0	0.000134411	5.0033e-05	1.27203e-06	0	0	5.93612e-06	0	0	0	1.14482e-05	0	0	0	4.24009e-07	0	0	0.000859466	0
V(23)	1.14482e-05	0	0	0	0	0	0	0	0	6.44493e-05	0.000916707	0	0	0	0	6.36013e-06	0	0	0
A(69)	0	0	0	0	0	0	0	4.24009e-06	0	0	0	0	0	0	0	0.000655942	2.54405e-05	0	0.000192924
I(52)	0	0	0	0	0	0	0	0	0	0	2.96806e-06	0	4.24009e-07	7.63216e-06	0	2.54405e-06	0.000786112	0	4.6641e-05
M(109)	0	0	0	0	0	0	0	0	0	0.000649581	2.62885e-05	0	0	0	0	0	1.10242e-05	0	5.13051e-05
K(15)	0	0.000111938	0.000515171	0	0	1.35683e-05	7.63216e-05	0	0	0	0	0	1.27203e-06	0	0	4.6641e-06	1.69603e-06	0	0
L(17)	0	0	0	0	0	0	0	0	0	0.000106426	0	0	0	0.000607181	1.27203e-06	0	0	0	3.81608e-06
I(48)	0	0	0	0	0	0	0	0	0	0	4.57929e-05	0	3.39207e-06	0	0	0	8.43777e-05	0	0.000558844
I(76)	0	0	0	0	0	0	0	0	0	0	7.20815e-06	0	1.27203e-06	1.27203e-06	0	4.24009e-06	0.000179356	0	0.000425281
L(46)	0	0	0	0	0	0	0	0	0	0	0	0	0	0.000616509	0	0	0	0	0
A(104)	0	0	0	0	0	0	0	4.24009e-07	0	0	4.24009e-07	0	0	0	0	5.93612e-06	2.54405e-06	0	0.000510931
G(6)	0	0	0	0.000254405	6.69934e-05	0	0	0	0	0	0	0	0	0	0	0.000117026	0	0	6.69934e-05
C(33)	0	4.24009e-07	0	0	0	0	0	8.48017e-07	0	0	0	0	0	0.000257797	0	0.000241685	0	1.69603e-06	0
T(208)	3.81608e-06	2.54405e-06	0	0	0	0	0	0	0	0.000435457	0	6.78414e-06	0	0	0	1.06002e-05	0	0	0
A(98)	0	0	0	4.6641e-06	0	0	0	1.27203e-06	0	0	0	0	0	0	0	0.000355319	1.48403e-05	0	4.9609e-05
S(4)	2.96806e-05	0	0	0	4.24009e-07	0	0	0	0	0	0	0	0	0.000351079	8.90418e-06	0	4.24009e-07	2.54405e-06	0
M(84)	0	0	0	0	0	0	0	0	0	0.000157731	7.33535e-05	0	0	0	0	0	0.000127203	0	3.30727e-05
I(201)	0	0	0	0	0	0	0	0	0	0	4.24009e-07	0	0	4.24009e-07	0	0	2.24725e-05	0	0.000355319
R(44)	0	0	0	0	0	0	0	4.24009e-07	0	0	0	0.000231085	1.22963e-05	0	0	8.18337e-05	0	0	0
S(214)	0	3.81608e-06	1.22963e-05	0	4.24009e-06	0	0	1.31443e-05	0	0.000277302	0	0	0	0	0	0	8.90418e-06	0	0
R(107)	0	0	0	0	2.96806e-06	0	0	0	0.000282814	0	2.24725e-05	0	0	0	0	4.24009e-06	0	0	0
L(87)	0	0	0	0	0	0	0	0	0	7.63216e-06	0	0	0	0.000296806	0	0	0	0	1.69603e-06
V(66)	5.85132e-05	0	0	0	0	0	0	1.27203e-06	0	0	0.000224301	0	1.90804e-05	4.24009e-07	0	0	0	0	0
A(83)	0	0	0	0	0	8.48017e-07	0	0	0	4.24009e-07	4.24009e-07	0	0	0	0	0.000181052	9.7946e-05	0	2.24725e-05
R(158)	0	0	0	0	0.000103034	0	0	0	4.24009e-05	0	0.000142891	0	0	0	1.27203e-06	4.24009e-06	0	0	0
A(40)	0	0	0	0	0	0	0	0	0	0	0	0	0	0	4.6641e-06	0.000276454	4.24009e-07	0	7.20815e-06
H(148)	0	3.94328e-05	4.6641e-06	0	0	0	1.56883e-05	0	0	0	1.69603e-06	0	0	0	0	0	0	0.00021794	0
C(86)	0	0	0	0	0	0	0	2.12004e-06	0	0	4.24009e-07	0	0	0.000254829	0	8.90418e-06	0	4.24009e-07	0
T(7)	1.10242e-05	0	1.44163e-05	0	0	0	0	0	0	0.000241685	0	0	0	0	0	2.12004e-06	0	0	0
T(175)	8.48017e-07	1.27203e-06	1.69603e-06	0	0	0	0	0	0	4.24009e-07	0	1.01762e-05	0.000244229	0	0	4.24009e-07	0	0	0
L(34)	0	0	0	0	0	0	0	0	0	1.69603e-06	0	0	0	0.000256101	0	0	0	0	8.48017e-07
I(73)	0	1.27203e-06	0	0	0	0	0	0	0	0	0.000195468	8.48017e-07	2.07764e-05	0	0	0	4.24009e-07	0	2.03524e-05
E(167)	4.24009e-07	0	0	7.80176e-05	0	0	0.000144163	7.20815e-06	0	0	0	1.27203e-06	0	0	0	0	0	0	0
V(10)	7.37775e-05	0	0	0	0	0	0	8.48017e-07	0	0.000127203	0	0	0	1.73844e-05	0	0	0	0	0
S(136)	0	0	0.000186988	0	2.96806e-06	0	0	2.12004e-05	0	2.12004e-06	0	0	0	0	0	0	0	0	0
R(146)	0	0	0	0	1.10242e-05	0	0	0	0.0001819	0	1.78084e-05	0	0	0	0	0	0	0	0
G(78)	4.24009e-07	0	0	5.93612e-06	0.000136955	0	0	0	0	0	0	0	0	0	0	5.63932e-05	0	0	4.6641e-06
K(162)	0	1.14482e-05	0.000178932	0	0	1.27203e-06	3.39207e-06	0	0	0	0	0	4.24009e-06	0	0	0	2.54405e-06	0	0
Q(185)	0	9.32819e-06	0	0	0	0	0	0	0.000183172	0	1.27203e-06	8.48017e-07	0	0	0	0	0	0	0
A(142)	0	0	0	0	0	0	0	8.48017e-07	0	0	0	0	0	0	0	9.7522e-06	8.48017e-07	0	0.000172996
S(212)	0	3.81608e-06	6.40253e-05	0	3.30727e-05	0	0	4.53689e-05	0	3.01046e-05	0	0	0	0	0	0	1.27203e-06	0	0
S(94)	0	1.01762e-05	6.36013e-06	0	2.37445e-05	0	0	4.40969e-05	0	3.56167e-05	0	0	0	0	0	0	3.30727e-05	0	0
L(93)	0	0	0	0	0	0	0	0	0	8.48017e-06	0	0	1.69603e-06	0.000127627	4.24009e-07	8.48017e-07	0	0	0
L(124)	0	4.24009e-07	0	0	0	0	0	0	0	4.02808e-05	0	0	0	7.92896e-05	0	0	0	0	1.31443e-05
C(64)	0	0	0	0	0	0	0	4.24009e-07	0	0	0	0	0	0.000110666	0	1.78084e-05	0	3.39207e-06	0
I(97)	0	0	0	0	0	0	0	0	0	0	2.96806e-06	0	7.20815e-06	1.82324e-05	0	8.48017e-07	2.45925e-05	0	7.71696e-05
A(188)	0	0	0	0	0	0	0	4.24009e-07	0	0	0	0	0	0	4.24009e-07	8.64978e-05	3.81608e-05	0	2.96806e-06
I(49)	0	0	0	0	0	0	0	0	0	0	4.24009e-07	0	4.24009e-07	2.12004e-06	0	0	0.00010261	0	1.61123e-05
A(38)	0	0	0	4.24009e-07	0	0	0	0	0	0	0	0	0	0	8.48017e-07	0.000117026	8.48017e-07	0	0
A(68)	0	0	0	4.24009e-07	0	0	0	1.69603e-06	0	0	0	0	0	0	8.48017e-07	0.00010685	3.39207e-06	0	8.48017e-07
W(75)	0	1.18722e-05	0	0	2.12004e-06	0	0	2.96806e-06	0	0	9.41299e-05	0	4.24009e-07	0	0	1.69603e-06	0	0	0
I(161)	0	0	0	0	0	0	0	0	0	0	2.67126e-05	0	5.51211e-06	6.78414e-06	0	0	4.24009e-06	0	6.91134e-05
I(80)	0	0	0	0	0	0	0	0	0	0	5.0881e-06	0	1.82324e-05	4.6641e-06	0	2.96806e-06	1.65363e-05	0	5.80892e-05
V(60)	2.54405e-06	0	0	0	0	4.24009e-07	0	4.24009e-07	0	5.38491e-05	4.6217e-05	0	0	0	0	0	0	0	0
I(8)	0	0	0	0	0	0	0	0	0	0	0	0	4.24009e-07	3.39207e-06	0	4.6641e-06	2.41685e-05	0	7.08095e-05
M(91)	0	0	0	0	0	0	0	0	0	1.48403e-05	5.72412e-05	0	0	0	0	0	8.05617e-06	0	1.99284e-05
D(215)	3.39207e-06	0	4.45209e-05	0	0	4.24009e-07	0	7.20815e-06	5.51211e-06	0	0	0	0	0	0	0	0	3.22247e-05	0
S(173)	4.6641e-06	0	0	0	0	0	0	0	0	0	0	7.46255e-05	0	0	8.48017e-06	0	2.96806e-06	0	0
I(24)	0	0	0	0	0	0	0	0	0	0	2.07764e-05	0	4.6641e-06	0	0	0	4.19769e-05	0	1.99284e-05
N(207)	0	0	0	5.51211e-06	0	0	0	0	1.69603e-06	3.81608e-06	0	3.51927e-05	0	0	0	3.68888e-05	4.24009e-07	2.12004e-06	0
E(11)	7.20815e-06	0	0	3.09526e-05	0	0	2.12004e-06	9.32819e-06	0	0	0	2.58645e-05	0	0	0	0	0	0	5.93612e-06
T(77)	1.14482e-05	0	3.39207e-06	0	0	0	0	0	0	3.34967e-05	0	0	0	0	4.24009e-07	3.01046e-05	0	0	0
I(128)	0	0	0	0	0	0	0	0	0	0	2.54405e-06	0	4.24009e-07	8.48017e-07	0	2.54405e-06	2.88326e-05	0	4.32489e-05
R(101)	0	0	0	0	0	0	0	0	0	0	0	7.54736e-05	0	0	0	0	4.24009e-07	0	0
W(31)	0	0	0	0	6.14813e-05	0	0	4.24009e-07	0	0	1.22963e-05	0	0	4.24009e-07	0	4.24009e-07	0	0	0
D(160)	2.54405e-06	0	1.69603e-06	0	0	1.06002e-05	0	1.52643e-05	4.24009e-07	0	0	0	0	0	0	0	0	4.24009e-05	0
V(88)	0	0	0	0	0	0	0	0	0	2.20485e-05	5.0881e-05	0	0	0	0	0	0	0	0
G(79)	8.48017e-07	4.24009e-07	0	0	0	4.24009e-07	0	0	0	0	0	0	0	0	0	0	0	0	6.99614e-05
R(186)	0	0	0	0	5.59692e-05	0	0	0	1.31443e-05	0	1.69603e-06	0	0	0	4.24009e-07	4.24009e-07	0	0	0
I(168)	0	0	0	0	0	0	0	0	0	0	4.24009e-06	0	4.24009e-07	9.32819e-06	0	0	0	0	5.55451e-05
E(12)	8.48017e-07	0	0	5.25771e-05	0	0	7.63216e-06	5.0881e-06	0	0	0	4.24009e-07	0	0	0	0	0	0	1.69603e-06
L(90)	0	0	0	0	0	0	0	0	0	0	0	0	4.24009e-07	5.72412e-05	0	5.51211e-06	0	0	1.69603e-06
I(144)	0	0	0	0	0	0	0	0	0	0	1.27203e-06	0	0	4.24009e-07	0	4.24009e-07	9.7522e-06	0	5.30011e-05
P(123)	4.24009e-07	4.24009e-07	0	0	0	0	3.81608e-06	0	0	0	1.01762e-05	0	0	0	0	4.49449e-05	4.24009e-06	0	0
N(43)	0	0	0	0	0	0	0	0	0	0	0	0	0	0	0	6.36013e-05	0	0	0
G(126)	4.24009e-07	0	0	2.75606e-05	9.7522e-06	4.24009e-07	0	0	0	0	0	0	0	4.24009e-07	0	2.41685e-05	0	0	8.48017e-07
G(189)	0	0	0	2.54405e-06	1.95044e-05	0	0	0	0	0	0	0	0	0	0	3.01046e-05	0	0	1.01762e-05
D(190)	2.96806e-06	0	5.0881e-06	0	0	5.13051e-05	0	0	4.24009e-07	0	0	0	0	0	0	0	0	1.27203e-06	4.24009e-07
T(127)	5.0881e-06	0	1.78084e-05	0	0	0	0	0	0	2.84086e-05	0	0	0	0	0	5.0881e-06	0	0	0
V(139)	0	0	0	0	0	4.24009e-07	0	0	0	5.42731e-05	8.48017e-07	0	0	0	0	0	0	0	0
L(129)	0	0	0	0	0	0	1.27203e-05	0	0	0	0	0	1.86564e-05	0	8.48017e-07	0	0	0	2.28965e-05
F(26)	0	0	0	0	5.51211e-06	0	0	0	0	1.69603e-06	4.45209e-05	0	0	0	0	8.48017e-07	0	0	1.69603e-06
F(45)	0	0	0	0	0	0	0	0	0	0	4.40969e-05	0	0	0	0	0	0	0	3.81608e-06
N(5)	0	0	0	1.27203e-05	0	0	0	0	2.54405e-06	8.48017e-07	0	2.12004e-06	0	0	0	1.14482e-05	0	1.78084e-05	0
L(145)	0	0	0	0	0	0	0	0	0	4.24009e-07	0	0	0	4.40969e-05	0	0	0	0	2.12004e-06

## Sheet: Occeania
	A	R	N	D	C	E	Q	G	H	I	L	K	M	F	P	S	T	Y	V
I(82)	0	0	0	0	0	0	0	0	0	0	0	0	0	0	0	0.000465622	0.562094	0	0
D(3)	0	0	0	0	0	0	0	0.0263631	0.000110862	0	0	0	0	0	0	0	0	0.00350325	2.21725e-05
Q(19)	0	4.43449e-05	0	0	0	0.0259196	0	0	0	0	0	0	0	0	0	0	0	0	0
A(63)	0	0	0	0	0	0	0	0	0	0	0	0	0	0	0	0	0.0259196	0	0
A(2)	0	0	0	0	0	0	0	0	0	0	0	0	0	0	0	0.00691781	2.21725e-05	0	0.000798208
R(44)	0	0	0	0	0	0	0	0	0	0	0	0	0	0	0	0.00465622	0	0	0
T(208)	0	0	0	0	0	0	0	0	0	0.00445666	0	0	0	0	0	0	0	0	0
K(162)	0	0	0.00361411	0	0	0	0	0	0	0	0	0	0	0	0	0	0	0	0
I(168)	0	0	0	0	0	0	0	0	0	0	0.00310414	0	0	0	0	0	0	0	0
G(89)	0	0	0	0	6.65174e-05	0	0	0	0	0	0	0	0	0	0	0.00161859	0	0	0
T(175)	0	2.21725e-05	0	0	0	0	0	0	0	0	0	2.21725e-05	0.00148555	0	0	0	0	0	0
L(17)	0	0	0	0	0	0	0	0	0	0	0	0	0	0.00108645	0	0	0	0	0
F(28)	0	0	0	0	0	0	0	0	0	0	0.000953416	0	0	0	0	0	0	0	0
S(4)	0	0	0	0	0	0	0	0	0	0	0	0	0	0.000620829	0	0	0	0	0
M(84)	0	2.21725e-05	0	0	0	0	0	0	0	0	0	0	0	0	0	0	0.000598656	0	0
M(109)	0	0	0	0	0	0	0	0	0	0.000421277	0.000155207	0	0	0	0	0	0	0	0
V(60)	0	0	0	0	0	0	0	0	0	0	0.000576484	0	0	0	0	0	0	0	0
A(83)	0	0	0	0	0	0	0	0	0	0	0	0	0	0	0	0	0.000554311	0	0
A(142)	0	0	0	0	0	0	0	0	0	0	0	0	0	0	0	0	0	0	0.000532139
R(146)	0	0	0	0	0	0	0	0	0.000487794	0	2.21725e-05	0	0	0	0	0	0	0	0
V(70)	0	0	0	0	0	0	0	0	0	0	0.000133035	0	0	0.000376932	0	0	0	0	0
H(148)	0	0	0	0	0	0	0	0	0	0	0	0	0	0	0	0	0	0.000487794	0
H(125)	0	0	2.21725e-05	0	0	0	0	0	0	0	0	0	0	0	0	0	0	0.000443449	0
G(189)	0	0	0	0	0	0	0	0	0	0	0	0	0	0	0	0	0	0	0.000376932
L(34)	0	0	0	0	0	0	0	0	0	0	0	0	0	0.000354759	0	0	0	0	0
T(7)	0	0	0	0	0	0	0	0	0	0.000354759	0	0	0	0	0	0	0	0	0
S(214)	0	0	0	0	4.43449e-05	0	0	0	0	0.000243897	0	0	0	0	0	0	0	0	0
L(46)	0	0	0	0	0	0	0	0	0	0	0	0	0	0.000266069	0	0	0	0	0
A(69)	0	0	0	0	0	0	0	0	0	0	0	0	0	0	0	0.000110862	0	0	0.000155207
A(40)	0	0	0	0	0	0	0	0	0	0	0	0	0	0	0	0.000266069	0	0	0
S(212)	0	0	0	0	0	0	0	0.000266069	0	0	0	0	0	0	0	0	0	0	0
V(66)	0	0	0	0	0	0	0	0	0	0	0.000110862	0	2.21725e-05	0.000110862	0	0	0	0	0
R(158)	0	0	0	0	2.21725e-05	0	0	0	4.43449e-05	0	0.000155207	0	0	0	0	0	0	0	0
I(49)	0	0	0	0	0	0	0	0	0	0	0	0	0	0	0	0	0	0	0.000199552
H(155)	0	0	0	0	0	0	0	0	0	0	0	0	0	0	0	0	0	0.00017738	0
Q(185)	0	0	0	0	0	0	0	0	0.000133035	0	0	0	0	0	0	0	0	0	0
V(10)	4.43449e-05	0	0	0	0	0	0	0	0	8.86898e-05	0	0	0	0	0	0	0	0	0
I(151)	0	0	0	0	0	0	0	0	0	0	0	0	0	0	0	2.21725e-05	0	0	0.000110862
V(143)	0	0	0	0	0	0	0	0	0	0	0.000110862	0	0	0	0	0	0	0	0
R(107)	0	0	0	0	6.65174e-05	0	0	0	4.43449e-05	0	0	0	0	0	0	0	0	0	0
D(209)	0	0	2.21725e-05	0	0	0	0	0	0	0	0	0	0	0	0	0	0	8.86898e-05	0
I(80)	0	0	0	0	0	0	0	0	0	0	0	0	0	0	0	0	8.86898e-05	0	2.21725e-05
V(170)	0	0	0	0	0	0	0	0	0	8.86898e-05	0	0	0	0	0	0	0	0	0
A(188)	0	0	0	0	0	0	0	0	0	0	0	0	0	0	0	8.86898e-05	0	0	0
A(98)	0	0	0	0	0	0	0	0	0	0	0	0	0	0	0	2.21725e-05	6.65174e-05	0	0
T(169)	0	0	6.65174e-05	0	0	0	0	0	0	0	0	0	0	0	0	0	0	0	0
I(73)	0	0	0	0	0	0	0	0	0	0	0	0	6.65174e-05	0	0	0	0	0	0
I(76)	0	0	0	0	0	0	0	0	0	0	0	0	0	0	0	0	4.43449e-05	0	2.21725e-05
S(197)	0	0	2.21725e-05	0	2.21725e-05	0	0	0	0	2.21725e-05	0	0	0	0	0	0	0	0	0
I(97)	0	0	0	0	0	0	0	0	0	0	0	0	0	0	0	2.21725e-05	0	0	4.43449e-05
D(190)	0	0	0	0	0	4.43449e-05	0	2.21725e-05	0	0	0	0	0	0	0	0	0	0	0
C(86)	0	0	0	0	0	0	0	0	0	0	0	0	0	6.65174e-05	0	0	0	0	0
D(160)	0	0	0	0	0	0	0	0	0	0	0	0	0	0	0	0	0	6.65174e-05	0
A(38)	0	0	0	0	0	0	0	0	0	0	0	0	0	0	0	4.43449e-05	0	0	0
W(55)	0	0	0	0	4.43449e-05	0	0	0	0	0	0	0	0	0	0	0	0	0	0
F(53)	0	0	0	0	0	0	0	0	0	0	0	0	0	0	0	4.43449e-05	0	0	0
L(87)	0	0	0	0	0	0	0	0	0	2.21725e-05	0	0	0	2.21725e-05	0	0	0	0	0
P(114)	0	0	0	0	0	0	0	0	0	0	2.21725e-05	0	0	0	0	2.21725e-05	0	0	0
G(25)	0	0	0	0	4.43449e-05	0	0	0	0	0	0	0	0	0	0	0	0	0	0
A(218)	0	0	0	0	0	0	0	0	0	0	0	0	0	0	0	0	0	0	4.43449e-05
A(85)	0	0	0	0	0	0	0	0	0	0	0	0	0	0	0	2.21725e-05	0	0	2.21725e-05
N(207)	0	0	0	2.21725e-05	0	0	0	0	0	0	0	2.21725e-05	0	0	0	0	0	0	0
S(94)	0	0	0	0	4.43449e-05	0	0	0	0	0	0	0	0	0	0	0	0	0	0
A(81)	0	0	0	0	0	0	0	0	0	0	0	0	0	0	0	4.43449e-05	0	0	0
R(101)	0	0	0	0	0	0	0	0	0	0	0	4.43449e-05	0	0	0	0	0	0	0
C(33)	0	0	0	0	0	0	0	0	0	0	0	0	0	2.21725e-05	0	2.21725e-05	0	0	0
W(75)	0	0	0	0	0	0	0	0	0	0	4.43449e-05	0	0	0	0	0	0	0	0
G(78)	0	0	0	0	4.43449e-05	0	0	0	0	0	0	0	0	0	0	0	0	0	0
F(26)	0	0	0	0	0	0	0	0	0	0	4.43449e-05	0	0	0	0	0	0	0	0
L(29)	0	0	0	0	0	0	0	0	0	0	0	0	0	4.43449e-05	0	0	0	0	0
S(173)	0	0	0	0	0	0	0	0	0	0	0	2.21725e-05	0	0	2.21725e-05	0	0	0	0
T(30)	4.43449e-05	0	0	0	0	0	0	0	0	0	0	0	0	0	0	0	0	0	0
W(31)	0	0	0	0	2.21725e-05	0	0	0	0	0	2.21725e-05	0	0	0	0	0	0	0	0
I(52)	0	0	0	0	0	0	0	0	0	0	0	0	0	0	0	0	2.21725e-05	0	2.21725e-05
S(136)	0	0	2.21725e-05	0	0	0	0	2.21725e-05	0	0	0	0	0	0	0	0	0	0	0
G(79)	0	0	0	0	0	0	0	0	0	0	0	0	0	0	0	0	0	0	2.21725e-05
F(100)	0	0	0	0	0	0	0	0	0	0	2.21725e-05	0	0	0	0	0	0	0	0
L(62)	0	0	0	0	0	0	0	0	0	0	0	0	0	0	0	2.21725e-05	0	0	0
I(128)	0	0	0	0	0	0	0	0	0	0	0	0	0	0	0	0	0	0	2.21725e-05
P(132)	0	0	0	0	0	0	0	0	0	0	0	0	0	0	0	2.21725e-05	0	0	0
N(74)	0	0	0	0	0	0	0	0	0	0	0	0	0	0	0	2.21725e-05	0	0	0
M(91)	0	0	0	0	0	0	0	0	0	2.21725e-05	0	0	0	0	0	0	0	0	0
L(90)	0	0	0	0	0	0	0	0	0	0	0	0	0	2.21725e-05	0	0	0	0	0
A(104)	0	0	0	0	0	0	0	0	0	0	0	0	0	0	0	0	0	0	2.21725e-05
A(68)	0	0	0	0	0	0	0	0	0	0	0	0	0	0	0	0	2.21725e-05	0	0
M(1)	0	0	0	0	0	0	0	0	0	2.21725e-05	0	0	0	0	0	0	0	0	0
K(15)	0	0	2.21725e-05	0	0	0	0	0	0	0	0	0	0	0	0	0	0	0	0
L(145)	0	0	0	0	0	0	0	0	0	0	0	0	0	2.21725e-05	0	0	0	0	0
V(23)	0	0	0	0	0	0	0	0	0	0	2.21725e-05	0	0	0	0	0	0	0	0
R(186)	0	0	0	0	2.21725e-05	0	0	0	0	0	0	0	0	0	0	0	0	0	0
E(167)	0	0	0	0	0	0	0	0	0	0	0	2.21725e-05	0	0	0	0	0	0	0
A(194)	0	0	0	0	0	0	0	0	0	0	0	0	0	0	0	2.21725e-05	0	0	0
A(195)	0	0	0	0	0	0	0	0	0	0	0	0	0	0	0	0	0	0	2.21725e-05
L(16)	0	0	0	0	0	0	0	0	0	0	0	0	0	2.21725e-05	0	0	0	0	0
R(174)	0	0	0	0	0	0	2.21725e-05	0	0	0	0	0	0	0	0	0	0	0	0
I(144)	0	0	0	0	0	0	0	0	0	0	0	0	0	0	0	0	2.21725e-05	0	0
I(8)	0	0	0	0	0	0	0	0	0	0	0	0	0	0	0	0	2.21725e-05	0	0
S(211)	0	0	0	0	0	0	0	0	0	0	0	0	0	0	2.21725e-05	0	0	0	0
E(11)	0	0	0	0	0	0	0	0	0	0	0	0	0	0	0	0	0	0	0
N(21)	0	0	0	0	0	0	0	0	0	0	0	0	0	0	0	0	0	0	0

## Sheet: South America
	A	R	N	D	C	E	Q	G	H	I	L	K	M	F	P	S	T	Y	V
I(82)	7.11749e-06	0	0	0	0	0	0	0	0	0	0	0	0	0	0	4.27049e-05	0.362081	0	0.000982213
D(3)	0	0	2.13525e-05	0	0	7.11749e-06	0	0.00387191	0.000832746	0	0	0	0	0	0	0	0	0.000220642	2.13525e-05
R(146)	0	0	0	0	1.4235e-05	0	0	0	0.00430608	0	0	0	0	0	0	0	0	0	0
A(63)	0	0	0	2.13525e-05	0	0	0	7.11749e-06	0	0	0	0	0	0	0	0.000341639	0.00343775	0	7.82924e-05
A(2)	0	0	0	0	0	7.11749e-06	0	0	0	0	0	0	0	0	2.13525e-05	0.00181496	4.27049e-05	0	0.00157296
Q(19)	0	2.13525e-05	0	0	0	0.00330251	0	0	2.13525e-05	0	0	7.11749e-06	0	0	0	0	0	0	0
R(44)	0	0	0	0	0	0	0	0	0	0	0	0.00237724	2.847e-05	0	0	2.13525e-05	0	0	0
A(40)	0	0	0	0	0	0	0	0	0	0	0	0	0	0	0	0.00231318	0	0	0
H(125)	0	2.13525e-05	2.13525e-05	7.11749e-06	0	0	1.4235e-05	0	0	0	1.4235e-05	0	0	0	0	0	0	0.00150891	0
L(29)	0	0	0	0	0	0	0	0	0	5.69399e-05	0	0	0	0.0013025	0	0	0	0	0
D(209)	1.4235e-05	0	0	0	0	0	0	0	0.00017082	0	0	0	0	0	0	0	0	0.00109609	7.11749e-06
V(70)	1.4235e-05	0	0	0	0	0	0	0	0	9.96448e-05	0.000192172	0	0	0.000740219	0	0	0	0	0
A(69)	0	0	0	0	0	0	0	3.55874e-05	0	0	0	0	0	0	0	0.000747336	0	0	8.54099e-05
F(28)	0	0	0	0	0	0	0	0	0	0	0.000854099	0	0	0	0	0	0	0	0
M(109)	0	0	0	0	0	0	0	0	0	0.000555164	0.000135232	0	0	0	0	0	7.11749e-06	0	4.27049e-05
S(197)	0	0	0.000640574	0	7.11749e-06	0	0	0	0	2.847e-05	0	0	0	0	0	0	5.69399e-05	0	0
A(85)	0	0	0	0	0	0	0	7.11749e-06	0	0	0	0	0	0	0	0.000320287	0	0	0.0002847
T(175)	0	0	0	0	0	0	0	0	0	0	0	2.13525e-05	0.000555164	0	0	0	0	0	0
C(33)	0	0	0	0	0	0	0	0	0	0	0	0	0	0.000483989	0	7.82924e-05	0	0	0
L(17)	0	0	0	0	0	0	0	0	0	8.54099e-05	0	0	0	0.000476872	0	0	0	0	0
V(23)	5.69399e-05	0	0	0	0	0	0	0	0	2.13525e-05	0.000434167	0	0	0	0	0	0	0	0
K(162)	0	0.000313169	0.000192172	0	0	0	0	0	0	0	0	0	0	0	0	0	0	0	0
H(155)	0	7.11749e-06	5.69399e-05	0	0	0	0	0	0	0	0	0	0	0	0	0	0	0.000412814	0
C(86)	0	0	0	0	0	0	0	0	0	0	0	0	0	0.000419932	0	4.27049e-05	0	0	0
G(6)	0	0	0	1.4235e-05	1.4235e-05	0	0	0	0	0	0	0	0	0	0	0.000370109	0	0	5.69399e-05
I(201)	0	0	0	0	0	0	0	0	0	0	0	0	0	0	0	0	7.11749e-06	0	0.000448402
S(4)	7.11749e-05	0	0	0	0	0	0	0	0	0	0	0	0	0.000341639	2.847e-05	0	0	0	0
R(158)	0	0	0	0	5.69399e-05	0	0	0	3.55874e-05	0	0.000334522	0	0	0	0	7.11749e-06	0	0	0
L(34)	0	0	0	0	0	0	0	0	0	1.4235e-05	0	0	0	0.000384344	7.11749e-06	0	0	0	0
I(24)	0	0	0	0	0	0	0	0	0	0	4.98224e-05	0	7.11749e-06	0	0	0	7.11749e-06	0	0.000327404
A(81)	0	0	0	0	0	0	0	0	0	0	0	0	0	0	0	0.000370109	7.11749e-06	0	0
S(94)	0	7.11749e-06	0	0	2.847e-05	0	0	0.000277582	0	4.27049e-05	0	0	0	0	0	0	1.4235e-05	0	0
T(208)	7.11749e-06	0	0	0	0	0	0	0	0	0.000348757	0	0	0	0	0	1.4235e-05	0	0	0
M(84)	0	0	0	0	0	0	0	0	0	0.000185055	1.4235e-05	0	0	0	0	0	0.000120997	0	4.98224e-05
A(98)	0	0	0	0	0	0	0	7.11749e-06	0	0	0	0	0	0	0	0.000348757	0	0	7.11749e-06
A(104)	0	0	0	0	0	0	0	0	0	0	0	0	0	0	0	0	0	0	0.000355874
I(76)	0	0	0	0	0	0	0	0	0	0	0	0	0	0	0	0	7.11749e-05	0	0.000277582
A(38)	0	0	0	0	0	0	0	0	0	0	0	0	0	0	0	0.000298935	7.11749e-06	0	0
A(142)	0	0	0	0	0	0	0	0	0	0	0	0	0	0	0	0	0	0	0.000306052
L(93)	0	0	0	0	0	0	0	0	0	1.4235e-05	0	0	0	0.000277582	0	0	0	0	0
R(107)	0	0	0	0	7.11749e-06	0	0	0	0.000249112	0	2.13525e-05	0	0	0	0	1.4235e-05	0	0	0
H(148)	0	5.69399e-05	7.11749e-06	0	0	0	0	0	0	0	0	0	0	0	0	0	0	0.00022776	0
A(83)	0	0	0	0	0	0	0	0	0	0	0	0	0	0	0	4.98224e-05	0.000220642	0	1.4235e-05
V(66)	0	0	0	0	0	0	0	2.13525e-05	0	0	0.00022776	0	2.847e-05	0	0	0	0	0	0
W(75)	0	1.4235e-05	0	0	1.4235e-05	0	0	0	0	0	0.000241995	0	0	0	0	0	0	0	0
G(78)	0	0	0	7.11749e-06	0.00019929	0	0	0	0	0	0	0	0	0	0	6.40574e-05	0	0	0
L(46)	0	0	0	0	0	0	0	0	0	0	0	0	0	0.00025623	0	0	0	0	0
K(15)	0	1.4235e-05	0.00017082	0	0	2.13525e-05	2.847e-05	0	0	0	0	0	0	0	0	0	0	0	0
C(64)	0	0	0	0	0	0	0	0	0	0	0	0	0	0.000220642	0	1.4235e-05	0	0	0
T(7)	7.11749e-06	0	1.4235e-05	0	0	0	0	0	0	0.000206407	0	0	0	0	0	7.11749e-06	0	0	0
S(214)	0	7.11749e-06	0	0	0	0	0	0	0	0.000206407	0	0	0	0	0	0	1.4235e-05	0	0
G(126)	0	0	0	7.11749e-05	1.4235e-05	0	0	0	7.11749e-06	0	0	0	0	0	0	0.000128115	0	0	0
V(10)	0.000185055	0	0	0	0	0	0	0	0	2.13525e-05	0	0	0	1.4235e-05	0	0	0	0	0
A(188)	0	0	0	0	0	7.11749e-06	0	0	0	0	0	0	0	0	0	0.000149467	3.55874e-05	0	0
H(210)	0	0.000149467	0	0	0	0	0	0	0	0	0	0	0	0	7.11749e-06	0	0	0	0
T(30)	2.13525e-05	0	0	0	0	0	0	0	0	0.000135232	0	0	0	0	0	0	0	0	0
R(101)	0	0	0	0	0	0	0	0	0	7.11749e-06	0	0.00014235	0	0	0	0	0	0	0
V(60)	0	0	0	0	0	0	0	0	0	1.4235e-05	0.000135232	0	0	0	0	0	0	0	0
S(136)	0	0	0.000106762	0	0	0	0	3.55874e-05	0	0	0	0	0	0	0	0	0	0	0
T(77)	1.4235e-05	0	0	0	0	0	0	0	0	4.27049e-05	0	0	0	0	0	7.82924e-05	0	0	0
L(87)	0	0	0	0	0	0	0	0	0	0	0	0	0	0.000128115	0	0	0	0	0
W(31)	0	0	0	0	8.54099e-05	0	0	0	0	0	4.27049e-05	0	0	0	0	0	0	0	0
S(173)	1.4235e-05	0	0	0	0	0	0	0	0	0	0	8.54099e-05	0	0	2.13525e-05	0	7.11749e-06	0	0
F(100)	0	0	0	0	0	0	0	0	0	0	7.82924e-05	0	0	0	0	4.98224e-05	0	0	0
I(73)	0	0	0	0	0	0	0	0	0	0	2.13525e-05	0	7.11749e-06	0	0	0	7.11749e-06	0	9.25273e-05
P(132)	3.55874e-05	0	0	0	0	0	0	0	0	0	0	0	0	0	0	1.4235e-05	1.4235e-05	0	5.69399e-05
N(43)	0	0	0	0	0	0	0	0	0	7.11749e-06	0	0	0	0	0	9.96448e-05	0	0	0
I(151)	0	0	7.11749e-06	0	0	0	0	0	0	0	0	0	0	0	0	0	0	0	9.96448e-05
A(68)	0	0	0	0	0	0	0	0	0	0	0	0	0	0	0	0.000106762	0	0	0
L(16)	0	0	0	0	0	0	0	0	0	9.96448e-05	0	0	0	0	0	0	0	0	0
M(91)	0	0	0	0	0	0	0	0	0	2.13525e-05	4.27049e-05	0	0	0	0	0	0	0	3.55874e-05
E(167)	0	0	0	2.13525e-05	0	0	7.11749e-05	0	0	0	0	0	0	0	0	0	0	0	0
I(168)	0	0	0	0	0	0	0	0	0	0	2.847e-05	0	7.11749e-06	7.11749e-06	0	0	0	0	4.98224e-05
P(123)	0	0	0	0	0	0	0	0	0	0	0	0	0	0	0	8.54099e-05	0	0	0
G(89)	0	0	0	0	0	0	0	0	0	0	0	0	0	0	0	8.54099e-05	0	0	0
D(160)	7.11749e-06	0	2.13525e-05	0	0	2.13525e-05	0	0	0	0	0	0	0	0	0	0	0	3.55874e-05	0
I(52)	0	0	0	0	0	0	0	0	0	0	0	0	0	3.55874e-05	0	7.11749e-06	3.55874e-05	0	7.11749e-06
I(97)	0	7.11749e-06	0	0	0	0	0	0	0	0	7.11749e-06	0	0	0	0	0	7.11749e-06	0	6.40574e-05
N(207)	0	7.11749e-06	0	0	0	0	0	0	0	0	0	7.11749e-05	0	0	0	7.11749e-06	0	0	0
F(26)	0	0	0	0	7.11749e-06	0	0	0	0	0	7.82924e-05	0	0	0	0	0	0	0	0
L(124)	0	0	0	0	0	0	0	0	0	2.847e-05	0	0	0	3.55874e-05	0	0	0	0	2.13525e-05
V(88)	0	0	0	0	0	0	0	0	0	7.11749e-06	6.40574e-05	0	0	0	0	0	0	0	0
I(49)	0	0	0	0	0	0	0	0	0	0	0	0	0	7.11749e-06	0	2.13525e-05	0	0	4.27049e-05
D(163)	0	0	4.27049e-05	0	0	7.11749e-06	0	0	7.11749e-06	0	0	0	0	0	0	0	0	7.11749e-06	0
I(161)	0	0	0	0	0	0	0	0	0	0	2.13525e-05	0	7.11749e-06	2.13525e-05	0	0	0	0	1.4235e-05
F(45)	0	0	0	0	0	0	0	0	0	0	6.40574e-05	0	0	0	0	0	0	0	0
G(79)	7.11749e-06	0	0	0	0	0	0	0	0	0	0	0	0	0	0	0	0	0	5.69399e-05
R(131)	0	0	0	0	0	0	0	0	0	3.55874e-05	0	1.4235e-05	0	0	0	0	7.11749e-06	0	0
D(190)	7.11749e-06	0	0	0	0	4.98224e-05	0	0	0	0	0	0	0	0	0	0	0	0	0
L(90)	0	0	0	0	0	0	0	0	0	0	0	0	0	4.98224e-05	0	0	0	0	7.11749e-06
R(186)	0	0	0	0	5.69399e-05	0	0	0	0	0	0	0	0	0	0	0	0	0	0
S(212)	0	0	2.13525e-05	0	0	0	0	2.13525e-05	0	1.4235e-05	0	0	0	0	0	0	0	0	0
Q(185)	0	7.11749e-06	0	0	0	0	0	0	3.55874e-05	0	1.4235e-05	0	0	0	0	0	0	0	0
E(11)	1.4235e-05	0	0	2.13525e-05	0	0	0	0	0	0	0	0	0	0	0	0	0	0	2.13525e-05
L(129)	0	0	0	0	0	0	2.13525e-05	0	0	0	0	0	7.11749e-06	0	0	0	0	0	2.13525e-05
I(128)	0	0	0	0	0	0	0	0	0	0	0	0	0	0	0	1.4235e-05	2.13525e-05	0	1.4235e-05
N(74)	0	0	0	7.11749e-06	0	0	0	0	0	0	0	0	0	0	0	2.847e-05	1.4235e-05	0	0
A(194)	0	0	0	0	0	0	0	7.11749e-06	0	0	0	0	0	0	0	2.13525e-05	0	0	2.13525e-05
I(48)	0	0	0	0	0	0	0	0	0	0	0	0	7.11749e-06	0	0	0	7.11749e-06	0	3.55874e-05
I(144)	0	0	0	0	0	0	0	0	0	0	0	0	0	0	0	0	0	0	4.27049e-05
