# Supplementary material for: Mutations in SARS-CoV-2 structural proteins: a global analysis
Source: Virol J. 2022 Dec 18;19:220. doi: 10.1186/s12985-022-01951-7 (PMC9759450; doi:10.1186/s12985-022-01951-7)
Supplement: Supplementary file 3 — Additional file 3: Mutation’s features of the N protein and the attributed frequencies among six continents and globally. [file 12985_2022_1951_MOESM3_ESM.xlsx]

## Sheet: Total
	A	R	N	D	C	E	Q	G	H	I	L	K	M	F	P	S	T	W	Y	V
R(203)	0	0	2.73903e-06	0	0	0.00054113	0	7.36115e-06	0	0.000391682	7.18996e-06	0.248938	0.608413	0	0	4.38245e-05	0.000141403	1.7119e-07	0	0.000229565
D(377)	4.14279e-05	0	9.929e-06	0	9.41543e-06	3.76617e-06	5.13569e-07	0.000116923	1.38664e-05	0	0	1.7119e-07	0	1.23257e-05	0	5.13569e-07	0	0	0.613473	5.30688e-06
D(63)	3.42379e-07	4.45093e-06	0.000140033	0	2.6192e-05	3.59498e-06	0	0.600219	2.36242e-05	3.42379e-07	0	0	0	0	0	0.00182351	0	0	0.000215528	0.000311223
G(215)	5.47807e-06	3.2526e-06	5.13569e-07	1.23257e-05	0.547949	0	0	0	0	0	0	0	0	8.71355e-05	0	0.000273903	0	0	5.39247e-05	9.22712e-05
G(204)	0.000126338	0.235263	0	0	0	3.92024e-05	5.27264e-05	0	0	0	0.00047488	1.7119e-07	1.7119e-07	0	0.0134386	2.05428e-06	1.7119e-07	0	0	0.000129762
D(3)	4.10855e-06	1.7119e-07	4.05719e-05	0	0	9.79205e-05	8.95322e-05	7.10437e-05	1.21545e-05	1.19833e-06	0.185389	1.7119e-07	0	0	4.21126e-05	5.13569e-07	1.7119e-07	0	0.000686984	2.32818e-05
S(235)	7.01877e-06	0	0	0	1.54071e-06	0	0	0	0	3.42379e-07	0.000109904	0	1.7119e-07	0.186237	1.60918e-05	0	1.02714e-06	0	1.43799e-05	2.39665e-06
Q(9)	0	2.29394e-05	0	6.84758e-07	0	6.50521e-06	0	0	0.00249064	0	0.039344	1.43799e-05	1.7119e-07	0	6.33402e-06	0	0	0	1.02714e-06	8.55948e-07
A(220)	0	0	0	1.7119e-07	0	0	0	3.08141e-06	0	3.42379e-07	1.7119e-07	0	0	6.79623e-05	3.42379e-07	0.000122914	4.05719e-05	0	0	0.0280708
P(199)	1.7119e-07	1.54071e-06	0	0	0	0	5.16993e-05	0	0	3.42379e-07	0.0266297	0	0	0	0	0.00120586	4.84467e-05	0	0	3.42379e-07
M(234)	0	7.70353e-06	0	0	1.36952e-06	0	0	0	0	0.0258905	2.91022e-05	2.73903e-06	0	8.55948e-07	0	0	2.29394e-05	0	0	0.000124968
T(205)	1.91732e-05	0	8.19998e-05	0	0	0	0	1.7119e-07	0	0.0248776	0	1.7119e-07	3.42379e-07	0	6.84758e-06	3.85177e-05	0	0	0	6.84758e-07
P(67)	7.18996e-06	2.82463e-05	0	0	0	0	3.42379e-07	0	9.96324e-05	0	0.000482755	0	0	1.50647e-05	0	0.0195949	3.08141e-05	0	8.55948e-07	0
P(80)	0.000151503	0.0183688	0	0	0	0	0.000146538	0	0	0	8.25134e-05	0	0	0	0	0.000258154	1.36952e-05	0	0	0
S(194)	0.000132158	0	0	0	0	0	0	0	0	0	0.0158131	1.7119e-07	0	0	5.37535e-05	0	3.08141e-06	0	0	3.42379e-07
S(327)	1.83173e-05	0	0	0	1.7119e-07	0	0	0	0	0	0.0116972	0	0	5.47807e-06	2.91022e-06	0	2.91022e-06	3.76617e-06	0	1.7119e-07
G(18)	6.50521e-06	3.42379e-07	1.7119e-07	7.36115e-06	0.000484467	0	0	0	0	0	0	0	0	4.45093e-06	0	0.000184371	0	0	0	0.007147
P(13)	8.55948e-07	4.65636e-05	0	0	0	0	0	0	3.56074e-05	1.18121e-05	0.00523874	0	0	5.99164e-06	0	0.00132432	0.000648809	0	0	0
A(208)	0	0	0	1.96868e-05	1.7119e-07	0	0	0.000108705	0	0	0	0	0	1.7119e-06	3.85177e-05	0.00648637	4.31398e-05	0	0	0.000485151
A(376)	0	0	0	1.88309e-06	0	0	0	1.7119e-07	0	7.70353e-06	1.7119e-07	1.7119e-07	0	0	6.84758e-07	0.000104768	0.0065391	0	0	0.000235043
S(202)	1.7119e-07	0.00221793	0.000892583	0	0.000273219	0	0	8.38829e-05	0	0.00279244	0	1.7119e-06	5.13569e-07	1.3524e-05	2.22546e-06	0	1.88309e-05	0	2.73903e-06	1.7119e-07
P(365)	3.93736e-06	2.17411e-05	0	0	0	0	6.00876e-05	0	0	0	0.00228144	1.7119e-07	0	0	0	0.00383516	2.41377e-05	0	0	1.7119e-07
T(135)	4.84467e-05	0	8.55948e-05	0	0	0	0	0	0	0.0042984	0	0	0	0	1.36952e-06	6.84758e-07	0	0	0	0
K(373)	0	6.91606e-05	0.00428933	0	0	1.55783e-05	1.2668e-05	0	1.7119e-07	0	0	0	1.04426e-05	0	0	0	2.10563e-05	0	0	0
P(383)	0.00027767	1.7119e-06	0	0	0	0	3.74905e-05	0	0	0	0.00233092	0	0	1.7119e-07	0	0.00153163	2.20835e-05	0	0	0
P(151)	3.08141e-06	1.36952e-06	0	0	0	0	0	0	2.44801e-05	0	0.00305796	0	0	4.10855e-06	0	0.000977835	4.45093e-06	0	0	0
S(412)	0	0.00348628	0.000145169	0	3.93736e-06	0	0	2.49937e-05	0	0.000200292	6.33402e-06	3.42379e-07	0	0	0	0	2.05428e-06	1.7119e-06	0	1.54071e-06
L(139)	0	0	0	0	0	0	0	0	0	0	0	0	2.39665e-06	0.00348148	0	1.38664e-05	0	2.39665e-06	0	6.33402e-06
V(270)	0	0	1.7119e-07	0	0	0	0	1.7119e-07	0	0.000108192	0.00334693	0	0	0	0	0	0	0	0	0
T(362)	0.000124455	7.01877e-06	0	0	0	0	0	0	0	0.00307029	0	0.000134041	0	0	1.02714e-06	9.41543e-06	0	0	0	0
R(385)	0	0	0	0	0	0	0	1.19833e-05	0	0.000233674	3.42379e-07	0.00301482	0	0	0	7.18996e-06	8.04591e-06	0	0	0
Q(418)	0	6.45385e-05	1.7119e-07	0	0	4.45093e-06	0	0	0.00307491	0	0.000114183	6.67639e-06	0	0	8.73067e-06	0	0	0	8.55948e-07	0
T(391)	2.12275e-05	0	1.19833e-05	0	0	0	0	0	0	0.00304786	0	0	0	1.7119e-07	1.36952e-06	5.99164e-06	0	0	1.7119e-07	1.7119e-07
P(207)	1.19833e-06	8.55948e-07	3.42379e-07	0	0	0	4.45093e-06	0	2.56784e-05	0	0.000855434	0	0	6.84758e-07	0	0.00198683	9.38119e-05	0	0	0
A(152)	0	0	0	1.91732e-05	0	0	0	5.30688e-06	0	0	1.7119e-07	0	0	3.93736e-06	4.10855e-06	0.00240042	8.37117e-05	0	0	0.000430713
T(366)	7.36115e-05	1.43799e-05	0	0	0	0	0	0	0	0.00266491	0	2.73903e-06	0	0	1.36952e-05	8.491e-05	0	0	0	0
A(398)	0	0	0	0	0	1.19833e-06	0	1.02714e-06	0	0	3.42379e-07	0	0	0	6.16283e-06	0.000257469	1.79749e-05	0	0	0.00243192
D(401)	2.9787e-05	0	4.38245e-05	0	0	2.05428e-06	0	7.53234e-06	2.58496e-05	0	0	0	0	1.7119e-07	0	0	0	0	0.00259113	2.39665e-06
A(119)	0	0	1.7119e-07	1.01002e-05	0	0	0	1.88309e-06	0	0	0	0	0	7.18996e-06	0.000101687	0.00251957	1.42087e-05	0	0	3.21836e-05
A(211)	0	0	1.7119e-07	3.3382e-05	0	0	0	1.19833e-06	0	0	0	0	1.7119e-07	0	5.13569e-06	0.000815034	0.000260722	0	0	0.0015217
S(187)	1.11273e-05	0	0	0	0	0	0	0	0	0	0.00257058	5.13569e-07	0	1.7119e-07	3.20125e-05	0	4.79331e-06	0	0	0
S(232)	0	6.53944e-05	6.04299e-05	0	1.45511e-05	1.7119e-07	0	0.00239734	0	3.62922e-05	0	0	0	0	0	0	6.16283e-06	0	0	0
A(90)	0	0	0	1.7119e-07	0	0	0	1.7119e-07	0	0	0	0	0	0	0	0.00162801	0.00080305	0	0	0.000106651
T(379)	0.000137465	0	8.14863e-05	0	0	0	0	0	0	0.00213833	0	3.42379e-07	0	0	5.82045e-06	3.64634e-05	0	0	0	8.55948e-07
S(193)	0	2.92734e-05	0.000102371	0	1.83173e-05	0	0	3.76617e-05	0	0.00185227	0	0	0	0	0	0	0.000354705	0	0	0
H(300)	0	0.00014106	4.10855e-06	3.42379e-06	1.7119e-07	0	2.48225e-05	0	0	0	2.49937e-05	1.7119e-07	0	0	2.73903e-06	0	0	0	0.00218712	0
Q(389)	0	5.13569e-06	0	0	0	4.45093e-06	0	0	0.00138304	0	0.000904052	2.39665e-06	0	0	1.88309e-06	0	0	0	1.7119e-07	0
M(210)	1.7119e-07	1.24968e-05	1.7119e-07	0	0	1.7119e-07	0	1.7119e-07	0	0.00190329	4.74195e-05	2.22546e-05	0	1.7119e-07	0	0	0.0001123	0	0	5.28976e-05
S(183)	4.3311e-05	0	0	0	6.84758e-07	0	0	0	0	0	0	0	0	1.74613e-05	0.000104254	0	0.000816061	3.42379e-07	0.00114081	0
G(238)	1.7119e-06	5.82045e-06	3.42379e-07	4.43381e-05	0.00179903	0	0	0	0	0	0	1.7119e-07	0	0	0	0.000118806	0	0	0	0.000124968
P(326)	1.7119e-07	2.27682e-05	0	0	0	0	0	0	5.10145e-05	0	0.000527949	0	0	1.36952e-06	0	0.00147634	1.06138e-05	0	0	0
A(12)	0	0	0	0	0	3.86889e-05	0	0.000294617	0	0	1.54071e-06	0	0	0	8.2171e-06	0.00104409	0.000184371	0	0	0.000508091
L(230)	0	0	0	0	0	0	1.7119e-07	0	0	5.06721e-05	0	0	0	0.00201045	0	0	0	0	0	1.02714e-06
R(209)	1.7119e-07	0	1.7119e-07	0	0	0	0	1.09561e-05	0	0.00154054	0	0.000292049	1.7119e-07	0	0	5.27264e-05	0.000142943	0	0	0
S(413)	0	0.000470258	3.93736e-05	0	2.91022e-06	0	0	6.16283e-05	0	0.00137157	0	0	0	2.91022e-06	0	0	2.10563e-05	0	0	0
R(14)	0	0	0	0	0.00122178	0	0	8.55948e-06	0.00023316	0	0.00033964	0	0	4.50229e-05	1.23257e-05	1.52359e-05	0	0	0	0
P(279)	6.84758e-07	2.73903e-06	0	0	0	0	0.00103878	1.7119e-07	0	0	0.000123941	1.02714e-06	0	0	0	0.0006346	2.9787e-05	0	0	0
P(6)	1.7119e-07	8.55948e-07	0	1.7119e-07	0	0	0	0	6.43673e-05	0	0.00109476	0	1.7119e-07	0	0	0.000177352	0.00040435	0	8.55948e-07	0
R(195)	0	0	1.7119e-06	0	0	0	0	1.69478e-05	0	0.00117624	2.03716e-05	0.000262091	0	0	0	4.21126e-05	0.000171874	0	0	0
D(144)	1.28392e-05	0	9.8434e-05	0	3.42379e-07	8.73067e-06	0	0.000129933	0.0006649	0	3.42379e-07	0	0	0	0	0	3.42379e-07	0	0.000679452	7.66929e-05
Q(229)	0	6.04299e-05	1.7119e-07	0	0	2.22546e-06	0	0	0.00156296	0	9.58662e-06	1.60918e-05	0	0	3.42379e-07	1.7119e-07	0	0	3.93736e-06	0
D(402)	1.91732e-05	0	1.3524e-05	0	0	2.94446e-05	0	6.41961e-05	0.000106309	0	0	0	0	0	0	1.7119e-07	0	0	0.00134863	2.80751e-05
G(243)	1.36952e-06	2.22546e-06	0	3.2526e-05	0.00126783	1.54071e-06	1.7119e-07	0	0	0	0	0	0	2.05428e-06	0	0.000169478	0	0	3.42379e-07	9.41543e-05
S(197)	6.16283e-06	0	1.7119e-07	0	0	0	0	0	0	0	0.00127536	0	0	1.7119e-07	9.41543e-05	0	0.000169478	0	0	0
A(156)	0	0	0	0	0	0	0	3.71481e-05	0	0	0	0	0	0	1.36952e-06	0.00145186	2.73903e-06	0	0	1.30104e-05
A(182)	0	0	0	1.47223e-05	0	0	1.7119e-07	0	0	0	0	0	0	1.7119e-06	1.50647e-05	0.00129608	5.40959e-05	0	5.13569e-07	5.63214e-05
N(8)	0	0	0	0.000866904	3.42379e-07	0	0	1.7119e-07	0.000100488	4.29686e-05	0	4.31398e-05	0	0	0	0.000174785	3.92024e-05	0	0.000159206	0
Q(289)	0	1.86597e-05	8.55948e-07	1.7119e-07	0	2.39665e-06	0	0	0.00123702	0	0.00015253	6.84758e-06	0	0	5.99164e-06	0	0	0	1.7119e-07	0
A(35)	0	1.7119e-07	0	0	0	8.2171e-06	0	1.19833e-06	0	0	4.45093e-06	0	0	0	1.88309e-06	0.000337415	0.000454337	0	0	0.000545752
H(145)	0	1.7119e-05	1.66054e-05	6.84758e-07	3.42379e-07	0	6.48809e-05	0	0	0	6.16283e-06	0	0	0	0	0	0	0	0.00122127	0
P(364)	7.01877e-06	6.84758e-07	0	0	0	0	1.52359e-05	0	0	0	0.000745873	3.42379e-07	0	0	0	0.000427974	8.76491e-05	0	0	0
G(214)	1.04426e-05	1.40375e-05	1.7119e-07	2.92734e-05	0.00106617	0	0	0	0	0	0	0	0	0	0	0.000118806	0	0	0	3.35532e-05
G(212)	2.91022e-06	4.9645e-06	1.7119e-07	7.65218e-05	0.00031944	0	0	0	1.7119e-07	0	0	0	0	5.13569e-07	0	0.000105453	0	0	0	0.000720879
G(34)	2.91022e-06	2.87599e-05	0	0	0	0.000303177	0	0	0	0	3.42379e-07	0	0	0	0	0	0	0.000817944	0	6.9503e-05
E(378)	3.32108e-05	0	0	3.23548e-05	0	0	0.000815034	1.60918e-05	0	0	1.7119e-07	3.42379e-06	0	0	0	0	0	0	0	0.000310196
S(206)	1.79749e-05	0	0	1.7119e-07	1.04426e-05	0	0	1.7119e-07	0	0	2.24258e-05	0	0	0.000950958	0.000186425	0	5.30688e-06	0	1.64342e-05	0
G(179)	1.7119e-07	3.42379e-06	0	7.3098e-05	6.50521e-05	0	0	0	0	0	0	0	0	0	0	0.000777886	0	0	0	0.000268596
P(142)	1.02714e-06	8.55948e-06	0	0	0	0	2.51649e-05	0	0	5.13569e-07	5.08433e-05	0	0	0	0	0.00108226	1.59206e-05	0	0	0
T(334)	6.41961e-05	2.92734e-05	0	0	0	0	0	0	0	0.00105419	0	2.17411e-05	0	0	0	1.23257e-05	0	0	1.7119e-07	0
S(190)	0	0.000127194	0.000101858	0	3.76617e-06	0	0	7.17284e-05	0	0.000877004	0	0	0	0	0	0	1.7119e-07	0	0	1.7119e-07
P(368)	1.7119e-07	1.79749e-05	0	0	0	0	7.87472e-06	0	3.04718e-05	8.55948e-07	0.000214672	1.7119e-07	0	0	0	0.000151503	0.0007469	0	0	0
A(252)	0	0	0	3.42379e-06	0	0	0	2.73903e-06	0	0	1.36952e-06	0	0	1.7119e-07	3.42379e-07	0.000671748	4.65636e-05	0	0	0.000441327
R(32)	1.7119e-07	0	0	0	0.000413423	0	0	3.42379e-07	0.000671406	0	4.27974e-05	0	0	4.10855e-06	5.13569e-07	9.929e-06	0	0	0	0
T(24)	0.000106994	0	0.000129933	0	0	0	0	0	0	0.000836604	1.7119e-07	0	0	0	3.59498e-06	5.64926e-06	0	0	0	0
T(271)	1.79749e-05	0	1.7119e-07	0	0	0	0	0	0	0.00105316	0	5.13569e-07	0	0	0	3.2526e-06	0	0	0	1.7119e-07
A(414)	0	0	0	4.10855e-06	0	0	0	1.19833e-06	0	0	0	1.7119e-07	0	1.7119e-07	6.50521e-06	0.000766245	5.18705e-05	0	0	0.000221691
G(96)	5.13569e-07	1.02714e-06	1.7119e-07	1.69478e-05	0.000399385	0	0	0	0	0	0	0	0	0	0	0.000560132	0	0	0	5.15281e-05
G(30)	0.000160405	0.000761623	0	0	0	4.94738e-05	1.7119e-07	0	0	0	0	1.7119e-07	0	0	0	1.36952e-06	0	0	0	5.39247e-05
Q(7)	0	8.37117e-05	0	0	0	5.13569e-07	0	0	9.05593e-05	0	1.9858e-05	0.000801167	0	0	2.10563e-05	0	0	0	0	0
A(251)	0	1.7119e-07	3.42379e-07	8.55948e-07	0	0	0	2.91022e-06	0	0	1.36952e-06	0	0	0	2.73903e-06	0.000489773	1.23257e-05	0	0	0.000494053
A(359)	0	0	0	1.7119e-07	0	3.42379e-07	0	2.73903e-06	0	0	0	0	0	0	0	0.000882996	6.33402e-05	0	0	2.41377e-05
K(370)	0	2.79039e-05	0.000859201	0	0	2.94446e-05	1.07849e-05	0	1.02714e-06	0	0	0	3.13277e-05	0	0	0	1.18121e-05	0	0	0
A(173)	0	0	0	0	0	1.7119e-07	0	0	0	3.42379e-07	0	0	0	0	3.42379e-07	0.000178893	1.96868e-05	0	1.7119e-07	0.000727385
E(136)	4.15991e-05	0	5.64926e-06	0.000786616	0	0	6.11147e-05	2.24258e-05	0	0	0	1.02714e-06	0	0	0	0	0	0	0	3.76617e-06
V(72)	5.13569e-07	0	0	1.7119e-07	0	0	0	0	0	0.000800825	0.000109219	0	0	1.02714e-06	0	0	0	0	0	0
S(2)	8.55948e-07	0	0	0	0	0	0	0	0	5.13569e-07	2.39665e-06	0	0	0.000121373	0.000431569	0	3.42379e-07	0	0.000352137	0
K(374)	0	7.32692e-05	0.000663017	0	0	8.67931e-05	8.2171e-06	0	0	1.7119e-07	0	0	4.94738e-05	0	0	0	8.55948e-06	0	0	0
G(236)	2.68768e-05	5.13569e-07	0	8.37117e-05	0.000129933	0	0	0	0	0	0	0	0	4.48517e-05	0	0.000126338	3.42379e-07	0	0	0.000467176
I(292)	0	0	4.45093e-06	0	0	0	0	0	0	0	2.13987e-05	0	8.55948e-07	1.7119e-07	0	1.36952e-06	0.000784733	0	0	5.56366e-05
S(33)	0	8.38829e-06	3.38955e-05	0	6.00876e-05	0	0	0.00015116	0	0.000599506	0	0	0	0	0	0	9.75781e-06	0	0	1.7119e-07

## Sheet: Africa
	A	R	N	D	C	E	Q	G	H	I	L	K	M	F	P	S	T	W	Y	V
R(203)	0	0	0	0	0	0	0	0	0	0.000455948	0	0.196514	0.419508	0	0	0.000455948	3.5073e-05	0	0	0
D(377)	3.5073e-05	0	0	0	0	0	0	0.000175365	0	0	0	0	0	0	0	3.5073e-05	0	0	0.42326	0.000105219
D(63)	0	0	0.000105219	0	0	3.5073e-05	0	0.407688	0	0	0	0	0	0	0	3.5073e-05	0	0	0.000105219	0
G(215)	0	0	0	0	0.311728	0	0	0	0	0	0	0	0	0	0	3.5073e-05	0	0	0	0
T(205)	0	0	0	0	0	0	0	3.5073e-05	0	0.210578	0	0	0	0	0	3.5073e-05	0	0	0	0
G(204)	0	0.191989	0	0	0	0.000280584	0.000105219	0	0	0	0.000105219	0	0	0	0.00059624	0	0	0	0	0.000315657
S(235)	3.5073e-05	0	0	0	0	0	0	0	0	0	0	0	3.5073e-05	0.0977483	0	0	0	0	3.5073e-05	0
D(3)	0	0	0.000245511	0	0	0	0.00150814	0.000175365	0	0	0.0940306	0	0	0	0	0	0	0	0.00140292	0
R(385)	0	0	0	0	0	0	0	3.5073e-05	0	0.000385802	0	0.0426136	0	0	0	0	0	0	0	0
L(139)	0	0	0	0	0	0	0	0	0	0	0	0	0	0.0398429	0	0	0	0	0	0
T(362)	7.01459e-05	0	0	0	0	0	0	0	0	0.0339155	0	0.000175365	0	0	0	0	0	0	0	0
P(13)	0	0	0	0	0	0	0	0	0	0	0.00445426	0	0	0	0	0.0287949	0.000245511	0	0	0
S(202)	0	0.000175365	0.0298822	0	7.01459e-05	0	0	0	0	0.00035073	0	0	0	0	0	0	7.01459e-05	0	0	0
R(195)	0	0	0	0	0	0	0	0	0	0.000806678	3.5073e-05	0.0245861	0	0	0	3.5073e-05	0.00035073	0	0	0
M(234)	0	0	0	0	0	0	0	0	0	0.0169052	0.000982043	3.5073e-05	0	0	0	0	0	0	0	0
S(187)	0	0	0	0	0	0	0	0	0	0	0.0165194	0.000105219	0	0	3.5073e-05	0	0.000105219	0	0	0
Q(9)	0	7.01459e-05	0	0	0	3.5073e-05	0	0	0.00154321	0	0.013959	0.000140292	0	0	0.000280584	0	0	0	0	0
P(151)	0	0	0	0	0	0	0	0	0.000140292	0	0.00059624	0	0	3.5073e-05	0	0.0145553	0	0	0	0
G(212)	3.5073e-05	3.5073e-05	0	0	0.00203423	0	0	0	0	0	0	0	0	3.5073e-05	0	0	0	0	0	0.0120651
A(376)	0	0	0	0	0	0	0	0	0	0	0	0	0	0	0	3.5073e-05	0.0133277	0	0	3.5073e-05
S(413)	0	3.5073e-05	3.5073e-05	0	0	0	0	0	0	0.0132225	0	0	0	0	0	0	0	0	0	0
P(207)	0	0	0	0	0	0	0	0	3.5073e-05	0	0.000666386	0	0	0	0	0.000105219	0.0117494	0	0	0
A(220)	0	0	0	0	0	0	0	0	0	0	3.5073e-05	0	0	7.01459e-05	0	3.5073e-05	0	0	0	0.0106622
D(144)	0	0	7.01459e-05	0	0	0	0	0.000210438	0.00217452	0	0	0	0	0	0	0	0	0	0.00603255	0
Q(289)	0	0	0	3.5073e-05	0	0	0	0	0.00824214	0	0	0.000140292	0	0	0	0	0	0	0	0
G(238)	0	3.5073e-05	0	0.000105219	0.00697952	0	0	0	0	0	0	3.5073e-05	0	0	0	0.000210438	0	0	0	0.000526094
E(378)	0	0	0	0	0	0	0.000701459	0	0	0	0	0	0	0	0	0	0	0	0	0.00476992
S(186)	0	3.5073e-05	0	0	0	0	0	0	0	0	0	0	0	0.00448934	3.5073e-05	0	0	0	0.000841751	0
S(194)	0	0	0	0	0	0	0	0	0	0	0.00529602	0	0	0	3.5073e-05	0	0	0	0	0
P(199)	0	0	0	0	0	0	0.000385802	0	0	0	0.00403339	0	0	0	0	0.000736532	3.5073e-05	0	0	0
L(230)	0	0	0	0	0	0	3.5073e-05	0	0	0	0	0	0	0.00452441	0	0	0	0	0	0
S(197)	3.5073e-05	0	3.5073e-05	0	0	0	0	0	0	0	0.000420875	0	0	0	0.000210438	0	0.00371773	0	0	0
D(128)	0	0	0	0	0	3.5073e-05	0	3.5073e-05	3.5073e-05	0	0	0	0	0	0	0	0	0	0.0042789	0
Q(70)	0	0.00406846	0	0	0	0	0	0	0.000210438	0	0	0	0	0	0	0	0	0	0	0
S(193)	0	0	0.000280584	0	0	0	0	3.5073e-05	0	0.00378788	0	0	0	0	0	0	0.000140292	0	0	0
Q(384)	0	3.5073e-05	0	0	0	0	0	0	0.00375281	0	0	7.01459e-05	0	0	0	0	0	0	0	0
D(402)	0	0	0	0	0	0	0	7.01459e-05	7.01459e-05	0	0	0	0	0	0	0	0	0	0.00357744	0
A(381)	0	0	0	0	0	0	0	0	0	0	0	0	0	0	7.01459e-05	0.00347222	0	0	0	3.5073e-05
A(119)	0	0	0	0	0	0	0	0	0	0	0	0	0	0	0	0.00343715	3.5073e-05	0	0	3.5073e-05
Q(418)	0	0.000175365	0	0	0	0	0	0	0.00143799	0	0.0016835	0	0	0	3.5073e-05	0	0	0	0	0
A(35)	0	0	0	0	0	3.5073e-05	0	0	0	0	0	0	0	0	7.01459e-05	0.000105219	0	0	0	0.00301627
P(67)	0	0	0	0	0	0	0	0	0.000280584	0	0.000245511	0	0	0	0	0.00252525	3.5073e-05	0	0	0
D(348)	0	0	7.01459e-05	0	0	0	0	0	0.00227974	0	0	0	0	0	0	0	0	0	0.000666386	0
A(208)	0	0	0	3.5073e-05	0	0	0	3.5073e-05	0	0	0	0	0	3.5073e-05	3.5073e-05	0.000911897	0	0	0	0.0016835
P(365)	0	3.5073e-05	0	0	0	0	3.5073e-05	0	0	0	0.00182379	0	0	0	0	0.000841751	0	0	0	0
G(236)	0	0	0	7.01459e-05	0.00161336	0	0	0	0	0	0	0	0	0	0	0.000105219	0	0	0	0.000911897
S(33)	0	7.01459e-05	0.000491021	0	0.000315657	0	0	0	0	0.0016835	0	0	0	0	0	0	0	0	0	0
S(2)	0	0	0	0	0	0	0	0	0	0	0	0	0	3.5073e-05	0.000140292	0	0	0	0.00234989	0
P(279)	0	0	0	0	0	0	0.00189394	3.5073e-05	0	0	0.000105219	0	0	0	0	0.000491021	0	0	0	0
M(210)	0	3.5073e-05	0	0	0	0	0	0	0	0.0022096	3.5073e-05	0	0	0	0	0	0.000245511	0	0	0
S(206)	0.00035073	0	0	0	7.01459e-05	0	0	0	0	0	0	0	0	0.00171857	0.000105219	0	0.000175365	0	0	0
N(11)	0	0	0	0	0	0	0	0	0	7.01459e-05	0	0	0	0	0	0.0020693	0.000280584	0	0	0
S(327)	7.01459e-05	0	0	0	0	0	0	0	0	0	0.00224467	0	0	0	7.01459e-05	0	0	0	0	0
A(134)	0	0	0	0	0	0	0	0	0	0	0.000210438	0	0	0	0	0.000140292	0	0	0	0.00199916
A(211)	0	0	0	3.5073e-05	0	0	0	0	0	0	0	0	3.5073e-05	0	0	0.000385802	7.01459e-05	0	0	0.00178872
D(401)	0	0	7.01459e-05	0	0	0	0	0	3.5073e-05	0	0	0	0	0	0	0	0	0	0.00217452	0
A(152)	0	0	0	0	0	0	0	0	0	0	0	0	0	0	0	0.00199916	0	0	0	0.000245511
S(201)	0	0.000105219	0.000385802	0	3.5073e-05	0	0	7.01459e-05	0	0.00164843	0	0	0	0	0	0	0	0	0	0
T(379)	7.01459e-05	0	0	0	0	0	0	0	0	0.00105219	0	0	0	0	0.000982043	3.5073e-05	0	0	0	7.01459e-05
V(270)	0	0	3.5073e-05	0	0	0	0	0	0	0.000245511	0.00171857	0	0	0	0	0	0	0	0	0
G(25)	0	0	0	3.5073e-05	0.000771605	0	0	0	0	0	0	0	0	3.5073e-05	0	0	0	0	0	0.00115741
P(383)	0	0.000140292	0	0	0	0	7.01459e-05	0	0	0	0.00126263	0	0	0	0	0.000491021	0	0	0	0
R(209)	3.5073e-05	0	0	0	0	0	0	7.01459e-05	0	0.00115741	0	0.000280584	0	0	0	0.000280584	0.000140292	0	0	0
A(359)	0	0	0	0	0	0	0	0	0	0	0	0	0	0	0	0.00185887	7.01459e-05	0	0	0
T(366)	0	0	0	0	0	0	0	0	0	0.00185887	0	0	0	0	0	0	0	0	0	0
Q(389)	0	3.5073e-05	0	0	0	0	0	0	0.000806678	0	0.000982043	0	0	0	0	0	0	0	0	0
G(18)	0.000245511	0	0	0	0.000245511	0	0	0	0	0	0	0	0	0	0	0.000280584	0	0	0	0.00105219
K(387)	0	0.00171857	7.01459e-05	0	0	0	0	0	0	0	0	0	0	0	0	0	0	0	0	0
D(22)	0	0	0	0	0	0	0	0.000210438	0	0	0	0	0	0	0	0	0	0	0.00154321	3.5073e-05
K(373)	0	3.5073e-05	0.00157828	0	0	0	3.5073e-05	0	0	0	0	0	0	0	0	0	3.5073e-05	0	0	0
P(80)	0	0.000841751	0	0	0	0	7.01459e-05	0	0	0	0.000210438	0	0	0	0	0.000526094	3.5073e-05	0	0	0
Q(380)	0	0	0	0	0	0.000105219	0	0	0	0	0.00108726	0	0	0	0.000455948	0	0	0	0	0
T(24)	0.000105219	0	0.000210438	0	0	0	0	0	0	0.00126263	0	0	0	0	0	0	0	0	0	0
G(243)	0	0.000280584	0	0	0.000806678	0	3.5073e-05	0	0	0	0	0	0	0	0	0.000245511	0	0	0	0.000105219
P(6)	0	0	0	0	0	0	0	0	0.000280584	0	0.000876824	0	0	0	0	0.000210438	0.000105219	0	0	0
H(300)	0	0	0	0	0	0	0	0	0	0	0	3.5073e-05	0	0	0	0	0	0	0.00136785	0
A(173)	0	0	0	0	0	0	0	0	0	0	0	0	0	0	0	0.000105219	0	0	3.5073e-05	0.00122755
A(90)	0	0	0	0	0	0	0	0	0	0	0	0	0	0	0	0.00122755	0.000140292	0	0	0
A(12)	0	0	0	0	0	0	0	0.000420875	0	0	0	0	0	0	3.5073e-05	0.00035073	0.000455948	0	0	0.000105219
N(213)	0	0	0	0	0	0	0	3.5073e-05	0	0.000491021	0	0	0	0	0	0	7.01459e-05	0	0.000736532	0
T(135)	0	0	0.000315657	0	0	0	0	0	0	0.000982043	0	0	0	0	0	0	0	0	0	0
G(34)	0	3.5073e-05	0	0	0	0.000385802	0	0	0	0	0	0	0	0	0	0	0	0.000806678	0	7.01459e-05
I(292)	0	0	0	0	0	0	0	0	0	0	7.01459e-05	0	0	0	0	0	0.00119248	0	0	3.5073e-05
P(364)	0.000806678	0	0	0	0	0	0	0	0	0	0.000245511	0	0	0	0	0.000245511	0	0	0	0
A(156)	0	0	0	0	0	0	0	0	0	0	0	0	0	0	0	0.00122755	0	0	0	0
A(182)	0	0	0	0	0	0	3.5073e-05	0	0	0	0	0	0	0	0	0.000982043	0	0	0	0.000175365
Q(28)	0	0.000701459	0	0	0	0.000175365	0	0	0.000315657	0	0	0	0	0	0	0	0	0	0	0
K(256)	0	0.00101712	0.000105219	0	0	0	0	0	0	0	0	0	3.5073e-05	0	0	3.5073e-05	0	0	0	0
A(125)	0	0	0	0	0	0	0	0	0	0	0	0	0	0	0	3.5073e-05	0	0	0	0.00112233
A(251)	0	0	0	3.5073e-05	0	0	0	0	0	0	0	0	0	0	0	0.000491021	0	0	0	0.000631313
A(217)	0	0	0	3.5073e-05	0	0	0	7.01459e-05	0	0	0	0	0	0	0	0.000561167	3.5073e-05	0	0	0.000455948
S(232)	0	3.5073e-05	0.000420875	0	0	3.5073e-05	0	0	0	0.000420875	0	0	0	0	0	0	0.000245511	0	0	0
D(103)	0.000105219	0	0.000105219	0	0	0.000175365	0	0	7.01459e-05	0	0	0	0	0	0	0	0	0	0.000666386	0
L(219)	3.5073e-05	0	0	0	0	0	0	0	0	0	0	0	0	0.00101712	0	0	0	0	0	0
R(14)	0	0	0	0	0.000280584	0	0	0	0.000140292	0	0.000561167	0	0	0	0	0	0	0	0	0
Q(7)	0	3.5073e-05	0	0	0	0	0	0	3.5073e-05	0	0	0.000806678	0	0	0	0	0	0	0	0
W(330)	0	0	0	0	0	0	0	0	0	0	0.000841751	0	0	0	0	0	3.5073e-05	0	0	0
P(326)	0	0	0	0	0	0	0	0	0.000315657	0	0.000175365	0	0	0	0	0.000315657	3.5073e-05	0	0	0
M(322)	0	0.000105219	0	0	0	0	0	3.5073e-05	0	0.000666386	0	0	0	0	0	0	3.5073e-05	0	0	0
A(218)	0	0	0	0	0	0	0	0	0	0	0	0	0	0	0	0.000140292	0	0	0	0.000631313

## Sheet: Asia
	A	R	N	D	C	E	Q	G	H	I	L	K	M	F	P	S	T	W	Y	V
R(203)	0	0	0	0	0	3.11664e-05	0	1.43845e-05	0	0.00035242	9.58966e-06	0.305282	0.603341	0	0	3.11664e-05	6.71276e-05	0	0	4.79483e-05
D(377)	1.91793e-05	0	1.19871e-05	0	4.79483e-06	2.39741e-06	7.19224e-06	5.27431e-05	2.39741e-06	0	0	2.39741e-06	0	2.39741e-06	0	0	0	0	0.591373	4.79483e-06
D(63)	2.39741e-06	0	4.31535e-05	0	1.43845e-05	4.79483e-06	0	0.57029	1.67819e-05	0	0	0	0	0	0	0.000105486	0	0	7.19224e-05	6.23328e-05
G(215)	7.19224e-06	0	4.79483e-06	1.43845e-05	0.478939	0	0	0	0	0	0	0	0	6.23328e-05	0	0.000175011	0	0	1.67819e-05	2.63716e-05
G(204)	5.03457e-05	0.304333	0	0	0	6.47302e-05	4.79483e-05	0	0	0	0.00035242	0	0	0	0.000436329	0	2.39741e-06	0	0	8.39095e-05
D(3)	2.39741e-06	2.39741e-06	0.000155832	0	0	0.000182204	0.000254126	3.59612e-05	4.79483e-06	4.79483e-06	0.168632	0	0	0	0	0	0	0	0.00247893	0.00013905
S(235)	2.39741e-06	0	0	0	4.79483e-06	0	0	0	0	0	1.43845e-05	0	0	0.169598	2.39741e-05	0	2.39741e-06	0	5.51405e-05	4.79483e-06
M(234)	0	0	0	0	0	0	0	0	0	0.0476079	7.43199e-05	0	0	4.79483e-06	0	0	7.19224e-06	0	0	5.99354e-05
T(205)	2.15767e-05	0	2.39741e-05	0	0	0	0	0	0	0.0261965	0	0	2.39741e-06	0	2.39741e-06	0.000146242	0	0	0	0
P(151)	2.39741e-06	4.79483e-06	0	0	0	0	0	0	1.67819e-05	0	0.0234347	0	0	5.27431e-05	0	0.00102849	7.19224e-06	0	0	0
S(194)	7.19224e-06	0	0	0	0	0	0	0	0	0	0.0219699	0	0	0	2.39741e-05	0	2.39741e-06	0	0	0
Q(418)	0	4.55509e-05	0	0	0	9.58966e-06	0	0	0.0207496	0	2.39741e-05	0	0	0	2.39741e-06	0	0	0	4.79483e-06	0
S(187)	1.67819e-05	0	0	0	0	0	0	0	0	0	0.0191074	0	0	2.39741e-06	7.19224e-06	0	0	0	0	0
R(385)	0	0	0	0	0	0	0	1.91793e-05	0	0.000318856	0	0.0183858	0	0	0	4.79483e-06	2.63716e-05	0	0	0
A(90)	0	0	0	0	0	0	0	0	0	0	0	0	0	0	0	0.0019443	0.0100835	0	0	7.91147e-05
L(139)	0	0	0	0	0	0	0	0	0	0	0	0	2.39741e-06	0.00865467	0	1.43845e-05	0	0	0	4.79483e-06
Q(9)	0	3.11664e-05	0	0	0	4.79483e-06	0	0	0.00179327	0	0.00536541	5.7538e-05	0	0	0	0	0	0	0	0
P(13)	0	2.63716e-05	0	0	0	0	0	0	2.15767e-05	0	0.00530788	0	0	4.79483e-06	0	0.00142886	0.000275703	0	0	0
T(362)	3.11664e-05	5.03457e-05	0	0	0	0	0	0	0	0.00594559	0	2.63716e-05	0	0	0	0	0	0	0	0
S(2)	2.39741e-06	0	0	0	0	0	0	0	0	0	4.79483e-06	0	0	0.000198985	0.00526952	0	0	0	6.47302e-05	0
S(327)	1.19871e-05	0	0	0	0	0	0	0	0	0	0.00399409	0	0	4.79483e-06	0	0	0	2.39741e-06	0	0
T(391)	4.55509e-05	0	2.39741e-06	0	0	0	0	0	0	0.00294882	0	0	0	0	2.39741e-06	7.19224e-06	0	0	0	0
D(144)	1.19871e-05	0	5.27431e-05	0	0	1.67819e-05	0	5.51405e-05	0.00133296	0	0	0	0	0	0	0	2.39741e-06	0	0.0012035	0
R(209)	0	0	2.39741e-06	0	0	0	0	1.67819e-05	0	0.00116754	0	0.00122508	2.39741e-06	0	0	3.59612e-05	0.000100691	0	0	0
P(142)	0	0	0	0	0	0	1.67819e-05	0	0	2.39741e-06	5.03457e-05	0	0	0	0	0.0023207	7.19224e-06	0	0	0
Q(229)	0	1.19871e-05	0	0	0	2.39741e-06	0	0	0.00222001	0	4.79483e-06	1.19871e-05	0	0	0	0	0	0	5.27431e-05	0
A(152)	0	0	0	0	0	0	0	0	0	0	0	0	0	4.79483e-06	0	0.00196588	4.55509e-05	0	0	0.000251729
P(383)	2.39741e-06	2.39741e-06	0	0	0	0	3.59612e-05	0	0	0	0.00119152	0	0	0	0	0.00100452	9.58966e-06	0	0	0
A(211)	0	0	0	4.79483e-06	0	0	0	7.19224e-06	0	0	0	0	0	0	2.39741e-06	0.000786352	0.0002781	0	0	0.000980543
S(250)	1.91793e-05	0	0	0	0	0	0	0	0	0	0	0	0	4.79483e-05	2.15767e-05	0	0.00190355	0	9.58966e-06	0
T(135)	1.43845e-05	0	4.55509e-05	0	0	0	0	0	0	0.0017573	0	0	0	0	2.39741e-06	0	0	0	0	0
S(193)	0	4.79483e-06	0.000115076	0	1.67819e-05	0	0	7.19224e-06	0	0.00114836	0	0	0	0	0	0	0.000412355	0	0	0
T(379)	6.23328e-05	0	3.83586e-05	0	0	0	0	0	0	0.00146962	0	2.39741e-06	0	0	2.39741e-06	9.58966e-06	0	0	0	2.39741e-06
P(67)	1.91793e-05	2.39741e-06	0	0	0	0	0	0	2.39741e-05	0	0.000378792	0	0	0	0	0.00113158	9.58966e-06	0	0	0
A(119)	0	0	0	1.43845e-05	0	0	0	0	0	0	0	0	0	2.39741e-06	4.79483e-06	0.00150797	7.19224e-06	0	0	2.39741e-05
G(34)	2.39741e-05	1.43845e-05	0	0	0	9.34992e-05	0	0	0	0	0	0	0	0	0	0	0	0.0013929	0	3.59612e-05
S(202)	0	1.91793e-05	0.00103329	0	0.000117473	0	0	2.15767e-05	0	0.000297279	0	0	0	0	0	0	4.0756e-05	0	0	0
P(199)	0	0	0	0	0	0	0	0	0	0	0.000894236	0	0	0	0	0.000558598	7.19224e-06	0	0	0
G(18)	1.43845e-05	0	0	7.19224e-06	0.000163024	0	0	0	0	0	0	0	0	0	0	0.000441124	0	0	0	0.000819916
A(208)	0	0	0	4.79483e-06	0	0	0	3.11664e-05	0	0	0	0	0	0	4.79483e-06	0.00106685	1.67819e-05	0	0	0.000294882
D(401)	7.19224e-06	0	2.15767e-05	0	0	0	0	4.79483e-06	2.15767e-05	0	0	0	0	2.39741e-06	0	0	0	0	0.00131378	0
A(134)	0	0	0	0	0	7.19224e-06	0	0	0	0	0	0	0	0	0	0.000968556	0	0	0	0.000381189
A(220)	0	0	0	0	0	0	0	0	0	0	0	0	0	0	0	0.000297279	8.39095e-05	0	0	0.000911018
T(366)	0	7.19224e-06	0	0	0	0	0	0	0	0.00127063	0	4.79483e-06	0	0	2.39741e-06	4.79483e-06	0	0	0	0
P(365)	0	2.39741e-06	0	0	0	0	7.19224e-06	0	0	0	0.000810326	2.39741e-06	0	0	0	0.000429137	7.19224e-06	0	0	0
D(402)	4.79483e-06	0	1.43845e-05	0	0	4.79483e-06	0	4.31535e-05	9.34992e-05	0	0	0	0	0	0	2.39741e-06	0	0	0.00108603	7.19224e-06
H(300)	0	3.35638e-05	2.39741e-06	1.19871e-05	0	0	0.000107884	0	0	0	5.7538e-05	0	0	0	1.43845e-05	0	0	0	0.000987735	0
S(183)	1.19871e-05	0	0	0	0	0	0	0	0	0	0	0	0	9.58966e-06	4.31535e-05	0	0.00105007	0	8.39095e-05	0
G(238)	0	2.39741e-06	0	5.03457e-05	0.000927799	0	0	0	0	0	0	0	0	0	0	5.03457e-05	0	0	0	0.000163024
P(80)	2.39741e-06	0.00084389	0	0	0	0	5.7538e-05	0	0	0	0.000103089	0	0	0	0	0.000170216	1.43845e-05	0	0	0
R(195)	0	0	0	0	0	0	0	1.19871e-05	0	0.000863069	0	0.000141447	0	0	0	9.11018e-05	7.67173e-05	0	0	0
A(217)	0	0	0	4.79483e-06	0	0	0	2.39741e-06	0	0	0	0	0	0	0	0.00106205	8.39095e-05	0	0	2.39741e-05
M(210)	2.39741e-06	0	2.39741e-06	0	0	0	0	2.39741e-06	0	0.000970953	3.11664e-05	4.79483e-06	0	0	0	0	7.19224e-05	0	0	8.15121e-05
A(182)	0	0	0	0	0	0	0	0	0	0	0	0	0	0	1.67819e-05	0.000961363	6.71276e-05	0	0	0.000112678
Q(389)	0	2.39741e-06	0	0	0	9.58966e-06	0	0	0.000934992	0	0.000206178	0	0	0	0	0	0	0	0	0
P(168)	7.19224e-06	0	0	0	0	0	0.000165422	0	0	0	1.67819e-05	0	0	0	0	0.000378792	0.000577777	0	0	0
V(270)	0	0	0	0	0	0	0	0	0	1.91793e-05	0.00108363	0	0	0	0	0	0	0	0	0
G(120)	0.000112678	7.67173e-05	0	0	0	5.03457e-05	0	0	0	0	0	0	0	0	0	0	0	0	0	0.000846287
P(279)	0	0	0	0	0	0	0.000261318	0	0	0	0.000198985	0	0	0	0	0.0005562	3.35638e-05	0	0	0
G(30)	0.00064011	0.000318856	0	0	0	3.35638e-05	2.39741e-06	0	0	0	0	0	0	0	0	0	0	0	0	3.35638e-05
L(161)	0	0	0	0	0	0	0	0	4.79483e-06	2.39741e-06	0	0	0	0.000994927	0	0	0	0	0	2.39741e-06
L(230)	0	0	0	0	0	0	0	0	0	0.000131858	0	0	0	0.000858274	0	0	0	0	0	4.79483e-06
A(12)	0	0	0	0	0	2.39741e-06	0	0.000429137	0	0	0	0	0	0	3.59612e-05	0.000232549	0.000105486	0	0	0.000189396
A(398)	0	0	0	0	0	2.39741e-06	0	0	0	0	0	0	0	0	0	0.000210972	2.39741e-06	0	0	0.000774365
P(326)	0	3.83586e-05	0	0	0	0	0	0	4.55509e-05	0	0.000323651	0	0	0	0	0.000568187	7.19224e-06	0	0	0
T(334)	1.91793e-05	1.43845e-05	0	0	0	0	0	0	0	0.000937389	0	2.39741e-06	0	0	0	9.58966e-06	0	0	0	0
K(373)	0	7.67173e-05	0.000877454	0	0	7.19224e-06	2.39741e-06	0	0	0	0	0	1.19871e-05	0	0	0	4.79483e-06	0	0	0
S(232)	0	0.00020378	0.000124666	0	4.79483e-06	0	0	0.000608943	0	3.59612e-05	0	0	0	0	0	0	0	0	0	0
A(156)	0	0	0	0	0	0	0	4.79483e-06	0	0	0	0	0	0	0	0.00091821	0	0	0	4.79483e-06
G(236)	9.58966e-06	0	0	3.59612e-05	0.000127063	0	0	0	0	0	0	0	0	0	0	0.00042674	0	0	0	0.000290087
G(212)	4.79483e-06	0	2.39741e-06	5.99354e-05	9.11018e-05	0	0	0	0	0	0	0	0	0	0	0.000122268	0	0	0	0.000601751
A(251)	0	0	0	0	0	0	0	2.39741e-06	0	0	0	0	0	0	0	0.000354817	7.19224e-06	0	0	0.000517842
S(413)	0	9.58966e-06	9.58966e-06	0	7.19224e-06	0	0	5.27431e-05	0	0.000776762	0	0	0	0	0	0	7.19224e-06	0	0	0
Q(7)	0	5.27431e-05	0	0	0	0	0	0	9.8294e-05	0	2.39741e-05	0.000450714	0	0	0.00021337	0	0	0	0	0
A(35)	0	0	0	0	0	4.79483e-06	0	0	0	0	0	0	0	0	7.19224e-06	9.11018e-05	8.63069e-05	0	0	0.000642507
T(265)	0	0	0	0	0	0	0	0	0	0.000791147	0	0	0	0	0	9.58966e-06	0	0	0	0
R(40)	0	0	0	0	0.000177409	0	0	0	0.000100691	0	0.000486675	0	0	0	9.58966e-06	9.58966e-06	0	0	0	0
S(33)	0	1.67819e-05	6.23328e-05	0	1.91793e-05	0	0	2.15767e-05	0	0.000652097	0	0	0	0	0	0	4.79483e-06	0	0	0
A(55)	0	0	0	0	0	0	0	0	0	0	0	0	0	0	1.67819e-05	0.000755186	0	0	0	0
D(348)	0	0	7.91147e-05	0	0	7.19224e-06	0	1.67819e-05	0.000405163	0	0	0	0	0	0	0	0	0	0.000244536	2.39741e-06
R(14)	0	0	0	0	0.000486675	0	0	9.58966e-06	5.27431e-05	0	0.000182204	0	0	7.19224e-06	7.19224e-06	4.79483e-06	0	0	0	0
P(6)	2.39741e-06	0	0	0	0	0	0	0	4.31535e-05	0	0.000441124	0	0	0	0	0.000100691	0.000146242	0	0	0
R(41)	0	0	0	0	0	0	0.000460304	0	0	0	0.000172614	0	0	0	2.39741e-06	0	0	8.87043e-05	0	0
Q(289)	0	7.19224e-06	0	0	0	0	0	0	0.00064011	0	2.15767e-05	2.63716e-05	0	0	0	0	0	0	0	0
K(374)	0	9.58966e-06	0.000450714	0	0	1.19871e-05	1.43845e-05	0	0	0	0	0	0.000179806	0	0	0	1.19871e-05	0	0	0
A(252)	0	0	0	9.58966e-06	0	0	0	0	0	0	0	0	0	0	0	0.000532226	1.67819e-05	0	0	0.000119871
A(267)	0	0	0	0	0	0	0	2.39741e-06	0	0	0	0	0	0	0	0.00026851	0.000155832	0	0	0.000237344
D(399)	0	0	0.000210972	0	0	4.79483e-06	0	1.67819e-05	0.000155832	0	0	0	0	0	0	0	0	0	0.000244536	4.79483e-06
T(24)	3.11664e-05	0	0.000105486	0	0	0	0	0	0	0.000493867	0	0	0	0	0	0	0	0	0	0
N(8)	0	0	0	0.000189396	2.39741e-06	0	0	0	7.19224e-06	2.8769e-05	0	1.91793e-05	0	0	0	7.67173e-05	0.000258921	0	3.83586e-05	0
T(16)	1.43845e-05	0	0	0	0	0	0	0	0	0	0	9.58966e-06	0.000560995	0	0	3.35638e-05	0	0	0	0
D(128)	0	0	8.87043e-05	0	0	1.91793e-05	0	4.79483e-06	3.35638e-05	0	0	0	0	0	0	0	0	0	0.000469893	0
A(414)	0	0	0	2.39741e-06	0	0	0	2.39741e-06	0	0	0	0	0	0	2.63716e-05	0.000436329	3.83586e-05	0	0	0.000107884
D(22)	4.79483e-06	0	0.000182204	0	0	0	0	7.91147e-05	1.43845e-05	0	0	0	0	0	0	0	0	0	0.000299677	1.43845e-05
G(243)	0	0	0	9.58966e-06	0.00049147	0	0	0	0	0	0	0	0	0	0	4.55509e-05	0	0	0	3.11664e-05
A(359)	0	0	0	0	0	2.39741e-06	0	0	0	0	0	0	0	0	0	0.000486675	5.51405e-05	0	0	2.63716e-05
S(412)	0	1.91793e-05	4.79483e-05	0	1.43845e-05	0	0	2.15767e-05	0	0.000462701	0	0	0	0	0	0	2.39741e-06	0	0	0
A(381)	0	0	0	2.39741e-06	0	2.39741e-06	2.39741e-06	0	0	9.58966e-06	0	4.79483e-06	0	0	0	0.000155832	3.59612e-05	0	0	0.000350023
G(147)	2.39741e-06	0	0	2.39741e-06	2.39741e-06	0	0	0	0	0	0	0	0	0	0	0.000549008	0	0	0	2.39741e-06
P(46)	0	0	0	0	0	0	0	0	0	0	3.11664e-05	0	0	0	0	0.000522636	0	0	0	0

## Sheet: Europe
	A	R	N	D	C	E	Q	G	H	I	L	K	M	F	P	S	T	W	Y	V
R(203)	0	0	4.18308e-06	0	0	0.00109109	0	6.9718e-07	0	0.000405062	6.27462e-06	0.282607	0.607464	0	0	1.3595e-05	0.00010876	0	0	0.000219612
D(377)	6.72779e-05	0	1.42922e-05	0	4.88026e-06	2.44013e-06	0	9.44679e-05	2.09154e-05	0	0	0	0	8.71475e-06	0	6.9718e-07	0	0	0.61047	2.44013e-06
D(63)	0	8.36616e-06	3.83449e-05	0	3.55562e-05	3.83449e-06	0	0.60028	3.52076e-05	0	0	0	0	0	0	0.000124447	0	0	0.000330812	0.000536829
G(215)	1.74295e-06	1.74295e-06	0	1.08063e-05	0.574262	0	0	0	0	0	0	0	0	9.13306e-05	0	0.000129676	0	0	3.83449e-05	9.8651e-05
G(204)	0.000244362	0.257014	0	0	0	2.61443e-05	7.63413e-05	0	0	0	0.000638966	0	0	0	0.0256834	3.13731e-06	0	0	0	0.000149894
D(3)	1.04577e-06	0	2.57957e-05	0	0	0.000152334	9.65595e-05	8.78447e-05	1.49894e-05	6.9718e-07	0.249323	0	0	0	8.5056e-05	0	0	0	0.000434692	1.81267e-05
S(235)	5.57744e-06	0	0	0	1.39436e-06	0	0	0	0	3.4859e-07	0.00020532	0	0	0.249739	1.56866e-05	0	6.9718e-07	0	6.27462e-06	4.18308e-06
Q(9)	0	1.25492e-05	0	0	0	6.27462e-06	0	0	0.00143689	0	0.0734636	5.57744e-06	3.4859e-07	0	9.41194e-06	0	0	0	3.4859e-07	1.74295e-06
A(220)	0	0	0	3.4859e-07	0	0	0	3.4859e-06	0	6.9718e-07	0	0	0	1.04577e-06	3.4859e-07	9.8651e-05	5.6123e-05	0	0	0.0508192
S(327)	3.17217e-05	0	0	0	0	0	0	0	0	0	0.0186632	0	0	6.9718e-06	2.78872e-06	0	1.39436e-06	6.27462e-06	0	3.4859e-07
M(234)	0	1.5338e-05	0	0	0	0	0	0	0	0.0152606	1.46408e-05	5.22885e-06	0	1.04577e-06	0	0	1.15035e-05	0	0	0.000114686
A(376)	0	0	0	1.39436e-06	0	0	0	0	0	1.56866e-05	3.4859e-07	0	0	0	6.9718e-07	0.000132464	0.011859	0	0	0.000119566
P(365)	5.22885e-06	4.04365e-05	0	0	0	0	9.48165e-05	0	0	0	0.00221878	0	0	0	0	0.00627741	1.18521e-05	0	0	3.4859e-07
T(205)	2.23098e-05	0	7.70384e-05	0	0	0	0	0	0	0.00797609	0	3.4859e-07	3.4859e-07	0	5.22885e-06	1.74295e-05	0	0	0	3.4859e-07
P(199)	0	6.9718e-07	0	0	0	0	2.68414e-05	0	0	0	0.00551539	0	0	0	0	0.0012741	3.6602e-05	0	0	0
S(194)	4.88026e-06	0	0	0	0	0	0	0	0	0	0.00622164	0	0	0	5.19399e-05	0	2.78872e-06	0	0	0
V(270)	0	0	0	0	0	0	0	0	0	0.000143968	0.00558302	0	0	0	0	0	0	0	0	0
S(202)	0	4.63625e-05	0.000664064	0	3.86935e-05	0	0	3.52076e-05	0	0.00470632	0	2.44013e-06	0	2.09154e-06	0	0	6.62321e-06	0	2.09154e-06	3.4859e-07
S(232)	0	7.1461e-05	4.28766e-05	0	8.36616e-06	0	0	0.00447625	0	2.719e-05	0	0	0	0	0	0	0	0	0	0
L(139)	0	0	0	0	0	0	0	0	0	0	0	0	1.74295e-06	0.00440095	0	1.04577e-05	0	3.4859e-07	0	1.18521e-05
T(135)	5.19399e-05	0	9.69081e-05	0	0	0	0	0	0	0.00405794	0	0	0	0	1.39436e-06	1.39436e-06	0	0	0	0
P(383)	1.39436e-06	3.4859e-07	0	0	0	0	3.90421e-05	0	0	0	0.0020389	0	0	0	0	0.00196675	2.96302e-05	0	0	0
P(80)	0.00029909	0.00257748	0	0	0	0	0.000184056	0	0	0	9.44679e-05	0	0	0	0	0.000206017	9.76053e-06	0	0	0
A(152)	0	0	0	3.72992e-05	0	0	0	6.62321e-06	0	0	3.4859e-07	0	0	6.9718e-06	6.62321e-06	0.00267473	0.000134904	0	0	0.000473037
A(398)	0	0	0	0	0	0	0	1.39436e-06	0	0	6.9718e-07	0	0	0	3.13731e-06	0.000308154	3.20703e-05	0	0	0.00290166
P(13)	6.9718e-07	4.53167e-06	0	0	0	0	0	0	4.53167e-05	1.04577e-06	0.000924461	0	0	6.9718e-07	0	0.00139785	0.000805592	0	0	0
H(300)	0	0.00024471	3.4859e-06	3.83449e-06	3.4859e-07	0	2.44013e-05	0	0	0	2.96302e-05	0	0	0	2.09154e-06	0	0	0	0.00281835	0
P(207)	1.74295e-06	6.9718e-07	0	0	0	0	5.92603e-06	0	2.719e-05	0	0.000338132	0	0	3.4859e-07	0	0.00272702	1.63837e-05	0	0	0
P(151)	3.4859e-07	3.4859e-07	0	0	0	0	0	0	2.82358e-05	0	0.00196117	0	0	0	0	0.00109806	2.78872e-06	0	0	0
P(326)	0	3.59048e-05	0	0	0	0	0	0	3.79963e-05	0	0.000569248	0	0	2.44013e-06	0	0.00240248	1.25492e-05	0	0	0
A(12)	0	0	0	0	0	7.39011e-05	0	2.85844e-05	0	0	3.13731e-06	0	0	0	4.18308e-06	0.00176631	0.000204274	0	0	0.000795134
G(238)	0	5.92603e-06	3.4859e-07	3.76477e-05	0.00245686	0	0	0	0	0	0	0	0	0	0	0.000111897	0	0	0	0.000117126
M(210)	0	1.5338e-05	0	0	0	0	0	0	0	0.00232928	6.72779e-05	2.96302e-05	0	3.4859e-07	0	0	0.000120264	0	0	5.68202e-05
R(385)	0	0	0	0	0	0	0	1.15035e-05	0	0.000198348	0	0.00239098	0	0	0	6.9718e-06	6.27462e-06	0	0	0
T(366)	8.5056e-05	6.9718e-07	0	0	0	0	0	0	0	0.00249486	0	1.74295e-06	0	0	9.76053e-06	5.92603e-06	0	0	0	0
K(373)	0	5.19399e-05	0.00237146	0	0	8.71475e-06	1.95211e-05	0	3.4859e-07	0	0	0	1.18521e-05	0	0	0	2.1264e-05	0	0	0
P(279)	6.9718e-07	1.39436e-06	0	0	0	0	0.0014477	0	0	0	0.00010632	1.39436e-06	0	0	0	0.00087775	1.49894e-05	0	0	0
S(193)	0	5.57744e-05	7.52955e-05	0	2.85844e-05	0	0	5.64716e-05	0	0.00188552	0	0	0	0	0	0	0.000300833	0	0	0
R(209)	0	0	0	0	0	0	0	6.9718e-06	0	0.00199812	0	0.000108063	0	0	0	8.05243e-05	0.000129676	0	0	0
T(379)	0.000214732	0	0.000104926	0	0	0	0	0	0	0.00194478	0	0	0	0	1.04577e-06	4.04365e-05	0	0	0	3.4859e-07
L(230)	0	0	0	0	0	0	0	0	0	7.52955e-05	0	0	0	0.0022118	0	0	0	0	0	6.9718e-07
A(211)	0	0	0	5.50773e-05	0	0	0	3.4859e-07	0	0	0	0	0	0	3.4859e-06	0.000706941	0.00031408	0	0	0.00119392
A(156)	0	0	0	0	0	0	0	1.67323e-05	0	0	0	0	0	0	1.74295e-06	0.00214174	5.57744e-06	0	0	1.22007e-05
T(362)	1.60351e-05	2.44013e-06	0	0	0	0	0	0	0	0.00197372	0	0.000122007	0	0	6.9718e-07	1.84753e-05	0	0	0	0
G(18)	2.78872e-06	0	0	6.27462e-06	0.000666156	0	0	0	0	0	0	0	0	6.27462e-06	0	7.28554e-05	0	0	0	0.00123506
R(14)	0	0	0	0	0.00117335	0	0	4.88026e-06	0.000227281	0	0.000389375	0	0	8.74961e-05	1.25492e-05	1.46408e-05	0	0	0	0
H(145)	0	5.57744e-06	1.84753e-05	0	0	0	0.000124098	0	0	0	7.32039e-06	0	0	0	0	0	0	0	0.00173633	0
G(243)	0	1.39436e-06	0	3.55562e-05	0.00146024	1.39436e-06	0	0	0	0	0	0	0	4.18308e-06	0	0.000222401	0	0	6.9718e-07	0.000142922
Q(289)	0	3.10245e-05	3.4859e-07	0	0	6.9718e-07	0	0	0.00169973	0	0.000124447	2.44013e-06	0	0	6.9718e-07	0	0	0	3.4859e-07	0
P(368)	3.4859e-07	0	0	0	0	0	6.9718e-07	0	3.31161e-05	1.39436e-06	0.000234601	3.4859e-07	0	0	0	7.84328e-05	0.00149441	0	0	0
A(119)	0	0	0	1.22007e-05	0	0	0	1.39436e-06	0	0	0	0	0	2.78872e-06	1.84753e-05	0.0017053	1.70809e-05	0	0	4.77569e-05
P(6)	0	1.39436e-06	0	0	0	0	0	0	1.74295e-05	0	0.000891694	0	0	0	0	0.000230418	0.000659184	0	1.74295e-06	0
G(96)	6.9718e-07	6.9718e-07	0	2.02182e-05	0.000657093	0	0	0	0	0	0	0	0	0	0	0.00101126	0	0	0	5.7866e-05
Q(229)	0	8.26159e-05	0	0	0	2.09154e-06	0	0	0.00161362	0	1.25492e-05	1.91725e-05	0	0	6.9718e-07	0	0	0	3.4859e-07	0
N(8)	0	0	0	0.00105518	0	0	0	3.4859e-07	0.000103531	1.67323e-05	0	6.62321e-06	0	0	0	0.000268414	3.20703e-05	0	0.000206365	0
A(90)	0	0	0	0	0	0	0	3.4859e-07	0	0	0	0	0	0	0	0.00144525	6.44892e-05	0	0	0.000141528
Q(389)	0	3.4859e-06	0	0	0	4.18308e-06	0	0	0.00154739	0	3.69506e-05	1.04577e-06	0	0	6.9718e-07	0	0	0	0	0
A(182)	0	0	0	4.53167e-06	0	0	0	0	0	0	0	0	0	1.39436e-06	1.28978e-05	0.0014334	3.4859e-05	0	0	6.58835e-05
K(370)	0	3.59048e-05	0.00140796	0	0	1.04577e-05	8.36616e-06	0	2.09154e-06	0	0	0	5.08942e-05	0	0	0	1.5338e-05	0	0	0
A(208)	0	0	0	1.98696e-05	0	0	0	4.46195e-05	0	0	0	0	0	0	5.22885e-06	0.00082581	4.32252e-05	0	0	0.000590512
S(183)	4.56653e-05	0	0	0	3.4859e-07	0	0	0	0	0	0	0	0	9.76053e-06	1.22007e-05	0	0.00144804	0	4.88026e-06	0
R(195)	0	0	6.9718e-07	0	0	0	0	1.42922e-05	0	0.0011859	3.83449e-06	6.23976e-05	0	0	0	1.60351e-05	0.000230418	0	0	0
W(330)	0	2.78872e-06	0	0	8.36616e-06	0	0	0	0	0	0.0014219	0	0	1.74295e-05	0	0	0	0	0	0
V(72)	0	0	0	0	0	0	0	0	0	0.00129257	0.000146756	0	0	6.9718e-07	0	0	0	0	0	0
G(34)	6.9718e-07	2.1264e-05	0	0	0	0.00047722	0	0	0	0	0	0	0	0	0	0	0	0.000866247	0	5.29857e-05
A(252)	0	0	0	2.09154e-06	0	0	0	1.04577e-06	0	0	0	0	0	0	0	0.00073692	5.99575e-05	0	0	0.000567505
A(35)	0	0	0	0	0	4.88026e-06	0	6.9718e-07	0	0	6.9718e-06	0	0	0	0	0.00013839	0.000617702	0	0	0.000560184
D(402)	4.53167e-06	0	1.60351e-05	0	0	6.27462e-06	0	7.913e-05	4.53167e-05	0	0	0	0	0	0	0	0	0	0.00113362	1.32464e-05
P(67)	2.09154e-06	2.44013e-06	0	0	0	0	3.4859e-07	0	0.000126887	0	0.000547287	0	0	0	0	0.000570642	3.20703e-05	0	0	0
A(173)	0	0	0	0	0	3.4859e-07	0	0	0	3.4859e-07	0	0	0	0	0	0.000333949	2.16126e-05	0	0	0.000903894
D(144)	3.83449e-06	0	0.000127235	0	3.4859e-07	6.27462e-06	0	0.000100743	0.000384495	0	0	0	0	0	0	0	3.4859e-07	0	0.000595043	3.83449e-05
S(413)	0	3.86935e-05	5.29857e-05	0	3.13731e-06	0	0	5.19399e-05	0	0.00108551	0	0	0	0	0	0	1.74295e-05	0	0	0
Q(418)	0	9.79538e-05	0	0	0	2.44013e-06	0	0	0.000994528	0	0.000114338	3.4859e-06	0	0	1.22007e-05	0	0	0	1.04577e-06	0
G(212)	2.09154e-06	2.09154e-06	0	6.86723e-05	0.000320006	0	0	0	0	0	0	0	0	0	0	6.86723e-05	0	0	0	0.000749469
S(197)	7.66898e-06	0	0	0	0	0	0	0	0	0	0.000866247	0	0	0	5.89117e-05	0	0.000252379	0	0	0
D(401)	3.97393e-05	0	4.39224e-05	0	0	3.4859e-06	0	5.22885e-06	2.33555e-05	0	0	0	0	0	0	0	0	0	0.00106529	3.13731e-06
A(359)	0	0	0	3.4859e-07	0	0	0	0	0	0	0	0	0	0	0	0.00108621	6.17005e-05	0	0	2.64929e-05
K(374)	0	0.000134904	0.000857532	0	0	0.000138042	6.27462e-06	0	0	0	0	0	1.49894e-05	0	0	0	8.71475e-06	0	0	0
A(251)	0	3.4859e-07	6.9718e-07	1.04577e-06	0	0	0	2.78872e-06	0	0	0	0	0	0	5.22885e-06	0.000705547	1.77781e-05	0	0	0.000421446
T(334)	0.000103183	1.67323e-05	0	0	0	0	0	0	0	0.00102067	0	4.18308e-06	0	0	0	4.53167e-06	0	0	0	0
D(103)	1.15035e-05	0	8.85419e-05	0	0	5.92603e-06	0	7.28554e-05	2.19612e-05	0	0	0	0	3.4859e-07	0	0	0	0	0.000934919	5.22885e-06
P(142)	1.74295e-06	4.88026e-06	0	0	0	0	8.01757e-06	0	0	3.4859e-07	3.83449e-05	0	0	0	0	0.000990345	1.15035e-05	0	0	0
G(200)	3.4859e-07	6.9718e-07	0	9.76053e-05	0.000795831	0	0	0	0	0	0	0	0	0	0	0.000119218	0	0	0	4.14822e-05
G(179)	0	6.9718e-07	0	5.7866e-05	5.82146e-05	0	0	0	0	0	0	0	0	0	0	0.000411336	0	0	0	0.000513473
E(378)	4.60139e-05	0	0	2.47499e-05	0	0	0.000422143	1.32464e-05	0	0	0	5.57744e-06	0	0	0	0	0	0	0	0.000486981
T(417)	1.28978e-05	0	3.83449e-06	0	0	0	0	0	0	0.000976401	0	0	0	0	1.04577e-06	3.83449e-06	0	0	0	3.4859e-07
S(33)	0	8.01757e-06	3.27675e-05	0	7.80842e-05	0	0	0.000204274	0	0.000652212	0	0	0	0	0	0	1.01091e-05	0	0	0
T(391)	2.61443e-05	0	9.76053e-06	0	0	0	0	0	0	0.000932827	0	0	0	3.4859e-07	6.9718e-07	3.13731e-06	0	0	0	0
R(32)	0	0	0	0	0.00042772	0	0	0	0.000496741	0	2.85844e-05	0	0	8.36616e-06	0	2.44013e-06	0	0	0	0
T(24)	6.72779e-05	0	8.6799e-05	0	0	0	0	0	0	0.000775962	0	0	0	0	7.32039e-06	1.74295e-06	0	0	0	0
G(236)	5.08942e-05	0	0	6.13519e-05	0.000172901	0	0	0	0	0	0	0	0	9.13306e-05	0	0.000127584	0	0	0	0.000405759
A(55)	0	0	0	0	0	0	0	3.4859e-07	0	0	0	0	0	0	2.26584e-05	0.000868338	1.04577e-06	0	0	3.4859e-07
S(187)	3.83449e-06	0	0	0	0	0	0	0	0	0	0.000838011	0	0	0	2.57957e-05	0	2.78872e-06	0	0	0
T(141)	1.88239e-05	4.88026e-06	0	0	0	0	0	0	0	0.000830342	0	1.39436e-06	0	0	0	3.4859e-07	0	0	0	0
P(46)	6.9718e-07	0	0	0	0	0	0	0	1.39436e-06	0	4.28766e-05	0	0	0	0	0.000802455	3.4859e-07	0	0	0
P(168)	1.39436e-06	3.4859e-07	0	0	0	0	9.2725e-05	0	0	0	1.81267e-05	0	0	0	0	0.000714958	9.41194e-06	0	0	0
S(37)	6.9718e-06	0	0	0	0	0	0	0	0	0	6.03061e-05	0	0	3.4859e-07	0.000521142	0	0.000227629	0	0	0
Q(7)	0	0.000105274	0	0	0	6.9718e-07	0	0	5.36829e-05	0	2.57957e-05	0.000604455	0	0	2.09154e-06	0	0	0	0	0
A(273)	0	0	0	0	6.9718e-07	0	0	0	0	0	0	0	0	0	0	0.000783282	6.9718e-07	0	0	5.57744e-06
Q(384)	3.4859e-07	4.53167e-06	0	0	0	3.4859e-07	0	0	0.00063792	0	0.000104577	6.9718e-07	0	0	1.74295e-05	0	0	0	0	0

## Sheet: North America
	A	R	N	D	C	E	Q	G	H	I	L	K	M	F	P	S	T	W	Y	V
R(203)	0	0	1.32962e-06	0	0	4.87527e-06	0	1.46258e-05	0	0.000399772	7.53451e-06	0.177601	0.631031	0	0	6.02761e-05	0.000210966	4.43207e-07	0	0.000299608
D(377)	1.63986e-05	0	1.32962e-06	0	1.68419e-05	2.21603e-06	0	0.000158225	7.97772e-06	0	0	0	0	1.15234e-05	0	0	0	0	0.642082	5.31848e-06
D(63)	4.43207e-07	4.43207e-07	0.000297392	0	1.81715e-05	3.10245e-06	0	0.625601	1.10802e-05	8.86413e-07	0	0	0	0	0	0.00451716	0	0	0.000112574	0.000110358
G(215)	4.43207e-07	5.76169e-06	4.43207e-07	1.15234e-05	0.548832	0	0	0	0	0	0	0	0	7.84476e-05	0	0.000492403	0	0	8.37661e-05	6.6481e-05
G(204)	6.6481e-06	0.176856	0	0	0	5.00823e-05	1.59554e-05	0	0	0	0.000295176	0	0	0	0.00025573	0	0	0	0	0.000120995
S(235)	1.01938e-05	0	0	0	1.32962e-06	0	0	0	0	4.43207e-07	2.03875e-05	0	0	0.125624	1.63986e-05	0	1.32962e-06	0	1.72851e-05	0
D(3)	8.86413e-06	0	2.349e-05	0	0	2.48196e-05	3.76726e-05	6.20489e-05	7.53451e-06	1.32962e-06	0.124204	4.43207e-07	0	0	8.86413e-07	1.32962e-06	4.43207e-07	0	0.000702926	9.75055e-06
P(199)	4.43207e-07	3.10245e-06	0	0	0	0	9.39598e-05	0	0	8.86413e-07	0.061311	0	0	0	0	0.00120995	7.26859e-05	0	0	8.86413e-07
P(67)	1.10802e-05	6.91402e-05	0	0	0	0	4.43207e-07	0	7.40155e-05	0	0.000451184	0	0	3.90022e-05	0	0.049597	3.32405e-05	0	2.21603e-06	0
T(205)	1.0637e-05	0	8.24364e-05	0	0	0	0	0	0	0.03939	0	0	0	0	1.0637e-05	4.52071e-05	0	0	0	1.32962e-06
M(234)	0	4.43207e-07	0	0	3.54565e-06	0	0	0	0	0.0363022	2.70356e-05	0	0	0	0	0	4.16614e-05	0	0	0.000160441
S(194)	0.000333291	0	0	0	0	0	0	0	0	0	0.0274912	0	0	0	5.49576e-05	0	3.10245e-06	0	0	8.86413e-07
P(80)	1.0637e-05	0.0193748	0	0	0	0	0.000127644	0	0	0	6.33785e-05	0	0	0	0	0.000357225	1.99443e-05	0	0	0
G(18)	4.87527e-06	4.43207e-07	4.43207e-07	7.97772e-06	0.000228251	0	0	0	0	0	0	0	0	2.65924e-06	0	0.0002903	0	0	0	0.0166384
A(208)	0	0	0	2.30467e-05	4.43207e-07	0	0	0.000215842	0	0	0	0	0	3.54565e-06	9.17438e-05	0.0153974	4.87527e-05	0	0	0.00037318
P(13)	8.86413e-07	0.00010504	0	0	0	0	0	0	2.96948e-05	2.88084e-05	0.00808232	0	0	8.42093e-06	0	0.000753451	0.000521211	0	0	0
S(412)	0	0.00898203	0.000179942	0	2.21603e-06	0	0	3.23541e-05	0	0.000229138	1.63986e-05	8.86413e-07	0	0	0	0	1.32962e-06	0	0	3.98886e-06
S(202)	0	0.00566994	0.000575282	0	0.000618273	0	0	0.000166202	0	0.00117893	0	1.32962e-06	1.32962e-06	1.99443e-05	4.43207e-06	0	2.70356e-05	0	4.43207e-06	0
K(373)	0	8.95277e-05	0.00767235	0	0	2.7922e-05	7.09131e-06	0	0	0	0	0	7.97772e-06	0	0	0	2.52628e-05	0	0	0
Q(9)	0	3.32405e-05	0	1.77283e-06	0	7.09131e-06	0	0	0.00412182	0	0.00313391	1.68419e-05	0	0	8.86413e-07	0	0	0	2.21603e-06	0
A(220)	0	0	0	0	0	0	0	3.54565e-06	0	0	0	0	0	4.43207e-07	4.43207e-07	0.000128087	1.59554e-05	0	0	0.00716045
T(391)	1.15234e-05	0	1.59554e-05	0	0	0	0	0	0	0.00589642	0	0	0	0	1.77283e-06	6.6481e-06	0	0	4.43207e-07	4.43207e-07
T(135)	5.5844e-05	0	8.24364e-05	0	0	0	0	0	0	0.00534064	0	0	0	0	0	0	0	0	0	0
S(327)	2.21603e-06	0	0	0	4.43207e-07	0	0	0	0	0	0.00522142	0	0	4.43207e-06	3.10245e-06	0	5.76169e-06	1.32962e-06	0	0
D(401)	2.30467e-05	0	4.34342e-05	0	0	8.86413e-07	0	1.0637e-05	3.10245e-05	0	0	0	0	0	0	0	0	0	0.00497632	2.21603e-06
P(383)	0.000716222	1.77283e-06	0	0	0	0	3.81158e-05	0	0	0	0.00262954	0	0	4.43207e-07	0	0.00117228	1.5069e-05	0	0	0
P(365)	2.21603e-06	3.98886e-06	0	0	0	0	3.23541e-05	0	0	0	0.00282411	0	0	0	0	0.00158313	4.56503e-05	0	0	0
T(362)	0.0002903	5.31848e-06	0	0	0	0	0	0	0	0.00351241	0	0.000165316	0	0	1.77283e-06	8.86413e-07	0	0	0	0
Q(389)	0	7.09131e-06	0	0	0	3.98886e-06	0	0	0.00132652	0	0.00223066	4.43207e-06	0	0	1.77283e-06	0	0	0	4.43207e-07	0
P(207)	8.86413e-07	8.86413e-07	0	0	0	0	3.54565e-06	0	2.08307e-05	0	0.00172939	0	0	1.32962e-06	0	0.00161372	7.04699e-05	0	0	0
A(211)	0	0	4.43207e-07	1.32962e-05	0	0	0	1.32962e-06	0	0	0	0	0	0	7.53451e-06	0.00100165	0.000186147	0	0	0.00214024
S(183)	5.1412e-05	0	0	0	1.32962e-06	0	0	0	0	0	0	0	0	2.26035e-05	0.000242434	0	7.40155e-05	0	0.0028804	0
S(413)	0	0.00116297	2.349e-05	0	2.21603e-06	0	0	6.07193e-05	0	0.00171432	0	0	0	7.53451e-06	0	0	3.05813e-05	0	0	0
T(366)	7.22427e-05	3.45701e-05	0	0	0	0	0	0	0	0.00261802	0	3.98886e-06	0	0	1.99443e-05	0.000210966	0	0	0	0
Q(418)	0	2.92516e-05	4.43207e-07	0	0	6.20489e-06	0	0	0.00270799	0	0.000108142	3.10245e-06	0	0	3.10245e-06	0	0	0	0	0
A(152)	0	0	0	2.21603e-06	0	0	0	5.31848e-06	0	0	0	0	0	4.43207e-07	2.21603e-06	0.00225991	3.50133e-05	0	0	0.000413069
T(379)	6.55946e-05	0	6.55946e-05	0	0	0	0	0	0	0.00245226	0	0	0	0	8.86413e-07	2.88084e-05	0	0	0	4.43207e-07
S(193)	0	2.65924e-06	0.000130303	0	7.53451e-06	0	0	2.03875e-05	0	0.00199133	0	0	0	0	0	0	0.000426365	0	0	0
A(398)	0	0	0	0	0	1.77283e-06	0	8.86413e-07	0	0	0	0	0	0	1.19666e-05	0.000206091	3.54565e-06	0	0	0.00234456
S(190)	0	0.000310245	3.36837e-05	0	1.32962e-06	0	0	7.88908e-05	0	0.00209105	0	0	0	0	0	0	4.43207e-07	0	0	4.43207e-07
A(119)	0	0	0	7.97772e-06	0	0	0	3.10245e-06	0	0	0	0	0	1.2853e-05	6.60378e-05	0.00224972	1.19666e-05	0	0	1.41826e-05
R(14)	0	0	0	0	0.00148784	0	0	1.32962e-05	0.0002903	0	0.000318666	0	0	2.65924e-06	1.46258e-05	1.59554e-05	0	0	0	0
A(90)	0	0	0	4.43207e-07	0	0	0	0	0	0	0	0	0	0	0	0.00191421	0.00010371	0	0	6.8697e-05
P(364)	1.77283e-06	4.43207e-07	0	0	0	0	2.30467e-05	0	0	0	0.00132652	0	0	0	0	0.000709131	9.75055e-06	0	0	0
S(206)	1.77283e-05	0	0	0	7.09131e-06	0	0	0	0	0	8.86413e-07	0	0	0.00197582	2.83652e-05	0	2.65924e-06	0	1.46258e-05	0
A(376)	0	0	0	3.10245e-06	0	0	0	4.43207e-07	0	0	0	0	0	0	8.86413e-07	9.17438e-05	0.00152951	0	0	0.000400216
D(144)	2.43764e-05	0	7.35723e-05	0	4.43207e-07	1.10802e-05	0	0.000179055	0.000901482	0	8.86413e-07	0	0	0	0	0	0	0	0.000605863	0.000140053
P(6)	0	4.43207e-07	0	4.43207e-07	0	0	0	0	9.26302e-05	0	0.00150025	0	4.43207e-07	0	0	0.000131632	0.000166646	0	0	0
D(402)	4.21046e-05	0	1.15234e-05	0	0	6.60378e-05	0	5.31848e-05	0.000191022	0	0	0	0	0	0	0	0	0	0.00143377	5.31848e-05
M(210)	0	1.24098e-05	0	0	0	4.43207e-07	0	0	0	0.00163277	2.92516e-05	1.81715e-05	0	0	0	0	0.000111245	0	0	3.54565e-05
G(30)	0.000154679	0.00158269	0	0	0	2.48196e-05	0	0	0	0	0	4.43207e-07	0	0	0	3.54565e-06	0	0	0	5.54008e-05
S(187)	2.03875e-05	0	0	0	0	0	0	0	0	0	0.00170546	0	0	0	4.69799e-05	0	7.53451e-06	0	0	0
H(300)	0	4.52071e-05	5.76169e-06	1.77283e-06	0	0	8.42093e-06	0	0	0	1.2853e-05	0	0	0	1.77283e-06	0	0	0	0.00166646	0
T(271)	1.19666e-05	0	0	0	0	0	0	0	0	0.00170635	0	4.43207e-07	0	0	0	1.32962e-06	0	0	0	0
N(213)	0	0	0	9.75055e-06	0	0	0	0	8.86413e-07	1.77283e-06	0	3.98886e-06	0	0	0	4.87527e-05	1.0637e-05	0	0.00159155	0
E(378)	2.30467e-05	0	0	4.47639e-05	0	0	0.00146701	1.86147e-05	0	0	4.43207e-07	1.32962e-06	0	0	0	0	0	0	0	9.13006e-05
R(209)	0	0	0	0	0	0	0	1.46258e-05	0	0.00109383	0	0.000326643	0	0	0	2.12739e-05	0.000166202	0	0	0
D(371)	3.54565e-06	0	3.14677e-05	0	0	0.00014094	0	2.12739e-05	0	0	0	0	0	0	0	0	0	0	0.00140408	1.5069e-05
R(32)	4.43207e-07	0	0	0	0.000483538	0	0	4.43207e-07	0.00103799	0	5.31848e-05	0	0	0	1.32962e-06	1.5069e-05	0	0	0	0
R(195)	0	0	3.54565e-06	0	0	0	0	2.03875e-05	0	0.00115012	4.69799e-05	0.000170191	0	0	0	6.60378e-05	0.000117893	0	0	0
A(414)	0	0	0	4.87527e-06	0	0	0	1.32962e-06	0	0	0	0	0	4.43207e-07	5.76169e-06	0.00108408	2.39332e-05	0	0	0.000434786
G(179)	4.43207e-07	7.97772e-06	0	9.83919e-05	6.60378e-05	0	0	0	0	0	0	0	0	0	0	0.00133317	0	0	0	2.88084e-05
S(197)	4.43207e-07	0	0	0	0	0	0	0	0	0	0.0013048	0	0	0	0.000156452	0	6.24921e-05	0	0	0
A(35)	0	4.43207e-07	0	0	0	1.2853e-05	0	1.77283e-06	0	0	2.65924e-06	0	0	0	2.65924e-06	0.000667469	0.000350576	0	0	0.000469799
Q(229)	0	4.34342e-05	0	0	0	2.65924e-06	0	0	0.00142402	0	7.97772e-06	1.37394e-05	0	0	0	4.43207e-07	0	0	0	0
P(151)	2.21603e-06	2.21603e-06	0	0	0	0	0	0	1.95011e-05	0	0.000784919	0	0	0	0	0.000627137	5.31848e-06	0	0	0
G(243)	3.54565e-06	0	0	3.67861e-05	0.00120685	4.43207e-07	0	0	0	0	0	0	0	0	0	0.000114791	0	0	0	5.40712e-05
Q(7)	0	6.51514e-05	0	0	0	4.43207e-07	0	0	0.000142269	0	1.37394e-05	0.00117317	0	0	1.19666e-05	0	0	0	0	0
A(182)	0	0	0	3.23541e-05	0	0	0	0	0	0	0	0	0	2.65924e-06	1.90579e-05	0.00122281	7.04699e-05	0	0	3.14677e-05
K(127)	0	6.47082e-05	2.65924e-06	0	0	1.46258e-05	0.00128087	0	0	8.86413e-06	4.43207e-07	0	0	0	0	0	3.10245e-06	0	0	0
T(24)	0.000183931	0	0.000196784	0	0	0	0	0	0	0.00096619	4.43207e-07	0	0	0	0	1.24098e-05	0	0	0	0
E(136)	1.24098e-05	0	9.75055e-06	0.00127599	0	0	2.43764e-05	2.61492e-05	0	0	0	8.86413e-07	0	0	0	0	0	0	0	4.43207e-06
G(238)	4.43207e-06	6.6481e-06	0	5.1412e-05	0.00101095	0	0	0	0	0	0	0	0	0	0	0.000147145	0	0	0	0.00012986
T(334)	2.88084e-05	4.91959e-05	0	0	0	0	0	0	0	0.00116519	0	4.91959e-05	0	0	0	2.21603e-05	0	0	0	0
N(8)	0	0	0	0.000826137	0	0	0	0	9.04141e-05	8.02204e-05	0	9.92783e-05	0	0	0	7.80044e-05	7.09131e-06	0	0.000114791	0
V(270)	0	0	0	0	0	0	0	4.43207e-07	0	8.11068e-05	0.00120508	0	0	0	0	0	0	0	0	0
P(279)	8.86413e-07	5.31848e-06	0	0	0	0	0.000710903	0	0	0	0.000122325	8.86413e-07	0	0	0	0.000377612	5.05256e-05	0	0	0
L(230)	0	0	0	0	0	0	0	0	0	8.86413e-06	0	0	0	0.00121572	0	0	0	0	0	8.86413e-07
L(139)	0	0	0	0	0	0	0	0	0	0	0	0	1.32962e-06	0.00118602	0	1.90579e-05	0	5.76169e-06	0	4.43207e-07
G(212)	2.65924e-06	7.97772e-06	0	8.99709e-05	0.000346144	0	0	0	0	0	0	0	0	8.86413e-07	0	0.000158225	0	0	0	0.00058326
P(326)	4.43207e-07	5.76169e-06	0	0	0	0	0	0	6.60378e-05	0	0.000538496	0	0	4.43207e-07	0	0.000549133	8.86413e-06	0	0	0
P(142)	0	1.32962e-06	0	0	0	0	4.87527e-05	0	0	4.43207e-07	6.55946e-05	0	0	0	0	0.00101184	2.12739e-05	0	0	0
P(122)	3.54565e-06	0	0	0	0	0	0	0	0.000146258	0	0.000798215	0	0	0	0	0.000190136	5.76169e-06	0	0	0
A(252)	0	0	0	4.43207e-06	0	0	0	4.43207e-06	0	0	3.54565e-06	0	0	4.43207e-07	4.43207e-07	0.00064265	3.8559e-05	0	0	0.000385147
Q(289)	0	4.43207e-06	1.77283e-06	0	0	5.31848e-06	0	0	0.000743257	0	0.000227365	7.09131e-06	0	0	1.37394e-05	0	0	0	0	0
A(218)	0	0	0	1.77283e-06	0	0	0	3.54565e-06	0	0	0	0	0	0	3.10245e-06	0.000806193	0.000113904	0	0	4.38775e-05
R(385)	0	0	0	0	0	0	0	1.0637e-05	0	0.000255287	8.86413e-07	0.000686527	0	0	0	8.42093e-06	7.09131e-06	0	0	0
S(37)	1.41826e-05	0	0	0	0	0	4.43207e-07	0	0	0	4.69799e-05	0	0	4.43207e-07	0.000858491	0	4.43207e-06	0	0	0
G(34)	8.86413e-07	4.12182e-05	0	0	0	0.000148031	0	0	0	0	8.86413e-07	0	0	0	0	0	0	0.00061783	0	7.80044e-05
T(16)	0.000384703	4.43207e-07	0	0	0	0	0	0	0	0	0	5.76169e-06	0.000477777	0	0	7.09131e-06	0	0	0	0
G(25)	4.43207e-07	5.05256e-05	0	0.000129416	0.000455173	0	0	0	0	0	0	0	0	4.43207e-07	0	8.50957e-05	0	0	0	0.000153793
A(336)	0	0	0	4.43207e-07	0	0	0	0	0	0	0	0	0	0	4.43207e-07	9.13006e-05	3.90022e-05	0	0	0.000729518
A(251)	0	0	0	4.43207e-07	0	0	0	3.10245e-06	0	0	3.54565e-06	0	0	0	4.43207e-07	0.000264151	7.97772e-06	0	0	0.000580601
P(168)	7.53451e-06	1.77283e-06	0	0	0	0	0.000112131	0	0	0	2.61492e-05	0	0	0	0	0.000697607	1.46258e-05	0	0	0
R(40)	0	0	0	0	0.000329303	0	0	6.20489e-06	0.000233127	0	0.00025573	0	0	0	6.20489e-06	1.77283e-05	0	0	0	4.43207e-07
G(214)	2.61492e-05	7.53451e-06	0	2.17171e-05	0.000573509	0	0	0	0	0	0	0	0	0	0	0.000191022	0	0	0	2.12739e-05
A(156)	0	0	0	0	0	0	0	7.35723e-05	0	0	0	0	0	0	1.32962e-06	0.000749462	0	0	0	1.63986e-05
A(359)	0	0	0	0	0	0	0	7.09131e-06	0	0	0	0	0	0	0	0.000738382	6.69242e-05	0	0	2.26035e-05
D(399)	3.54565e-06	0	0.000172851	0	0	7.97772e-06	0	3.98886e-06	0.000216285	0	0	0	0	1.77283e-06	0	0	0	0	0.000386476	1.63986e-05
G(236)	3.10245e-06	1.32962e-06	0	0.000128973	5.54008e-05	0	0	0	0	0	0	0	0	0	0	7.80044e-05	8.86413e-07	0	0	0.000532291

## Sheet: Occeania
	A	R	N	D	C	E	Q	G	H	I	L	K	M	F	P	S	T	W	Y	V
R(203)	0	0	0	0	0	0	0	0	0	0.000157626	4.50359e-05	0.30084	0.61438	0	0	2.2518e-05	0	0	0	2.2518e-05
D(377)	0	0	0	0	2.2518e-05	0	0	0	0	0	0	0	0	0	0	0	0	0	0.615663	0
D(63)	0	0	0.00011259	0	0	0	0	0.610777	0	0	0	0	0	0	0	2.2518e-05	0	0	2.2518e-05	0
G(215)	0	0	0	0.000202662	0.605598	0	0	0	0	0	0	0	0	2.2518e-05	0	2.2518e-05	0	0	0	2.2518e-05
G(204)	0	0.299016	0	0	0	0	2.2518e-05	0	0	0	9.00718e-05	0	0	0	0.00168885	0	0	0	0	0
P(151)	0	0	0	0	0	0	0	0	2.2518e-05	0	0.013173	0	0	0	0	0.00011259	0	0	0	0
D(3)	0	0	0	0	0	0	0	0	0	0	0.0122498	0	0	0	0	0	0	0	0.000472877	0
S(235)	0	0	0	0	0	0	0	0	0	0	0	0	0	0.0123398	0	0	0	0	0	0
T(205)	0	0	2.2518e-05	0	0	0	0	0	0	0.0122047	0	0	0	0	0	0	0	0	0	0
P(13)	0	2.2518e-05	0	0	0	0	0	0	0	0	0.0114391	0	0	0	0	0.000450359	4.50359e-05	0	0	0
S(197)	0	0	0	0	0	0	0	0	0	0	0.00932243	0	0	2.2518e-05	9.00718e-05	0	4.50359e-05	0	0	0
T(362)	0	0	0	0	0	0	0	0	0	0.00747596	0	0.000337769	0	0	0	0	0	0	0	0
G(18)	6.75539e-05	0	0	0	0.00637258	0	0	0	0	0	0	0	0	4.50359e-05	0	0	0	0	0	0.000157626
L(230)	0	0	0	0	0	0	0	0	0	0	0	0	0	0.00562949	0	0	0	0	0	0
L(161)	0	0	0	0	0	0	0	0	0	2.2518e-05	0	0	0	0.0046387	0	0	0	0	0	0
S(206)	0	0	0	0	0	0	0	0	0	0	0	0	0	0.00457115	4.50359e-05	0	0	0	0	0
S(194)	0	0	0	0	0	0	0	0	0	0	0.00457115	0	0	0	2.2518e-05	0	0	0	0	0
P(344)	0	0	0	0	0	0	0.00292733	0	0	0	0	0	0	0	0	2.2518e-05	0	0	0	0
S(412)	0	4.50359e-05	0.00240942	0	0	0	0	0	0	0.000292733	0	0	0	0	0	0	0	0	0	0
G(30)	0	0.00022518	0	0	0	0.00234187	0	0	0	0	0	0	0	0	0	0	0	0	0	4.50359e-05
P(199)	0	0	0	0	0	0	0	0	0	0	0.00184647	0	0	0	0	0.000360287	9.00718e-05	0	0	0
M(101)	0	0	0	0	0	0	0	0	0	0.00218424	0	0	0	0	0	0	0	0	0	0
D(348)	0	0	0	0	0	0	0	0	0.0017564	0	0	0	0	0	0	0	0	0	0.000157626	0
R(385)	0	0	0	0	0	0	0	2.2518e-05	0	6.75539e-05	0	0.00173388	0	0	0	0	0	0	0	0
A(376)	0	0	0	0	0	0	0	0	0	0	0	0	0	0	0	4.50359e-05	0.000427841	0	0	0.00135108
P(67)	0	0	0	0	0	0	0	0	2.2518e-05	0	0	0	0	0	0	0.00166633	0	0	0	0
T(141)	0	4.50359e-05	0	0	0	0	0	0	0	0.00159878	0	0	0	0	0	0	0	0	0	0
S(416)	0	0	0	0	0	0	0	0	0	0	6.75539e-05	0	0	0	0	0	0.00139611	0	0	0
G(34)	0	2.2518e-05	0	0	0	6.75539e-05	0	0	0	0	0	0	0	0	0	0	0	0.00132856	0	0
M(234)	0	0	0	0	0	0	0	0	0	0.0013736	0	0	0	0	0	0	0	0	0	2.2518e-05
Q(9)	0	0	0	0	0	0	0	0	0.000405323	0	0.0008782	0	0	0	0	0	0	0	0	0
A(182)	0	0	0	0	0	0	0	0	0	0	0	0	0	0	0	0.00101331	9.00718e-05	0	0	0
A(134)	0	0	0	0	0	0	0	0	0	0	0	0	0	0	0	2.2518e-05	0	0	0	0.00108086
D(144)	0	0	0.00011259	0	0	2.2518e-05	0	6.75539e-05	0.000517913	0	0	0	0	0	0	0	0	0	0.000315251	0
T(366)	0.000337769	0	0	0	0	0	0	0	0	0.000675539	0	0	0	0	0	0	0	0	0	0
P(326)	0	0	0	0	0	0	0	0	6.75539e-05	0	0.000562949	0	0	0	0	0.000382805	0	0	0	0
R(14)	0	0	0	0	0.000540431	0	0	0	4.50359e-05	0	0.000405323	0	0	0	0	0	0	0	0	0
A(220)	0	0	0	0	0	0	0	0	0	0	0	0	0	0	0	2.2518e-05	0	0	0	0.000945754
S(202)	0	0	0.000900718	0	2.2518e-05	0	0	0	0	2.2518e-05	0	0	0	0	0	0	0	0	0	0
A(251)	0	0	0	0	0	0	0	0	0	0	0	0	0	0	0	0.000720575	0	0	0	0.00022518
H(145)	0	0	2.2518e-05	0	0	0	0	0	0	0	0	0	0	0	0	0	0	0	0.000900718	0
Q(409)	0	0.000135108	0	0	0	0	0	0	0.000743093	0	2.2518e-05	0	0	0	0	0	0	0	0	0
L(139)	0	0	0	0	0	0	0	0	0	0	0	0	0	0.0008782	0	0	0	0	0	0
Q(244)	0	0.000833164	0	0	0	0	0	0	0	0	0	0	0	0	0	0	0	0	0	0
G(212)	4.50359e-05	0	0	0.000135108	0.00011259	0	0	0	0	0	0	0	0	0	0	0	0	0	0	0.000517913
S(327)	2.2518e-05	0	0	0	0	0	0	0	0	0	0.000788129	0	0	0	0	0	0	0	0	0
A(381)	0	0	0	0	0	0	0	0	0	0	0	0	0	0	0	2.2518e-05	0.000382805	0	0	0.000405323
I(337)	0	0	0	0	0	0	0	0	0	0	0	0	0	0	0	0	0	0	0	0.000810646
V(270)	0	0	0	0	0	0	0	0	0	4.50359e-05	0.000675539	0	0	0	0	0	0	0	0	0
P(365)	0	0	0	0	0	0	0	0	0	0	0.000405323	0	0	0	0	0.000292733	0	0	0	0
D(22)	0	0	0	0	0	0	0	0.000517913	0	0	0	0	0	0	0	0	0	0	0.000157626	0
Q(418)	0	0	0	0	0	2.2518e-05	0	0	0.000562949	0	2.2518e-05	0	0	0	6.75539e-05	0	0	0	0	0
N(48)	0	0	0	0	0	0	0	0	0	0.000585467	0	0	0	0	0	0	2.2518e-05	0	0	0
T(135)	0	0	0	0	0	0	0	0	0	0.000585467	0	0	0	0	0	0	0	0	0	0
K(373)	0	2.2518e-05	0.000540431	0	0	0	0	0	0	0	0	0	0	0	0	0	0	0	0	0
A(119)	0	0	0	0	0	0	0	0	0	0	0	0	0	0	0	0.000405323	0	0	0	0.000157626
S(193)	0	0	4.50359e-05	0	0	0	0	0	0	0.000337769	0	0	0	0	0	0	0.00011259	0	0	0
A(267)	0	0	0	0	0	0	0	0	0	0	0	0	0	0	0	2.2518e-05	0	0	0	0.000472877
P(383)	0	0	0	0	0	0	0	0	0	0	0.000180144	0	0	0	0	0.000315251	0	0	0	0
A(156)	0	0	0	0	0	0	0	0	0	0	0	0	0	0	0	0.000472877	0	0	0	2.2518e-05
K(370)	0	0	0.000472877	0	0	0	0	0	0	0	0	0	0	0	0	0	0	0	0	0
S(190)	0	2.2518e-05	0	0	0	0	0	0	0	0.000450359	0	0	0	0	0	0	0	0	0	0
A(90)	0	0	0	0	0	0	0	0	0	0	0	0	0	0	0	0.000135108	9.00718e-05	0	0	0.00022518
S(232)	0	2.2518e-05	2.2518e-05	0	2.2518e-05	0	0	0.000337769	0	4.50359e-05	0	0	0	0	0	0	0	0	0	0
R(209)	0	0	0	0	0	0	0	0	0	0.000270215	0	6.75539e-05	0	0	0	0	9.00718e-05	0	0	0
A(398)	0	0	0	0	0	0	0	0	0	0	0	0	0	0	0	0.000337769	0	0	0	9.00718e-05
T(334)	0	0	0	0	0	0	0	0	0	0.000360287	0	4.50359e-05	0	0	0	0	0	0	0	0
P(80)	0	0.00022518	0	0	0	0	2.2518e-05	0	0	0	0.000135108	0	0	0	0	2.2518e-05	0	0	0	0
P(162)	0	0	0	0	0	0	0	0	0	0	0.000135108	0	0	0	0	0.000270215	0	0	0	0
P(168)	0	0	0	0	0	0	0	0	0	0	9.00718e-05	0	0	0	0	0.000315251	0	0	0	0
I(292)	0	0	0	0	0	0	0	0	0	0	0	0	0	0	0	0	0.000382805	0	0	2.2518e-05
A(211)	0	0	0	0	0	0	0	0	0	0	0	0	0	0	0	4.50359e-05	0	0	0	0.000337769
T(379)	0	0	0	0	0	0	0	0	0	0.000382805	0	0	0	0	0	0	0	0	0	0
P(364)	9.00718e-05	0	0	0	0	0	2.2518e-05	0	0	0	6.75539e-05	0	0	0	0	4.50359e-05	0.000135108	0	0	0
D(401)	0	0	0	0	0	0	0	0	0	0	0	0	0	0	0	0	0	0	0.000360287	0
Q(289)	0	0	0	0	0	0	0	0	0.000292733	0	0	4.50359e-05	0	0	0	0	0	0	0	0
P(142)	0	0	0	0	0	0	0	0	0	0	0.000270215	0	0	0	0	4.50359e-05	0	0	0	0
R(89)	0	0	0	0	0	0	0	0	0	0.000135108	0	0.000135108	0	0	0	0	4.50359e-05	0	0	0
D(343)	0	0	0	0	0	0	0	0	0.000270215	0	0	0	0	0	0	0	0	0	4.50359e-05	0
Q(7)	0	4.50359e-05	0	0	0	0	0	0	2.2518e-05	0	0	0.000247698	0	0	0	0	0	0	0	0
L(331)	0	0	0	0	0	0	0	0	0	0	0	0	0	0.000315251	0	0	0	0	0	0
T(391)	0	0	0	0	0	0	0	0	0	0.000315251	0	0	0	0	0	0	0	0	0	0
D(402)	0	0	0	0	0	0	0	0	0	0	0	0	0	0	0	0	0	0	0.000315251	0
R(195)	0	0	0	0	0	0	0	0	0	0.000157626	0	0.000157626	0	0	0	0	0	0	0	0
D(103)	0	0	0	0	0	0	0	0	4.50359e-05	0	0	0	0	0	0	0	0	0	0.000247698	0
A(252)	0	0	0	0	0	0	0	0	0	0	0	0	0	0	0	0.000180144	0	0	0	0.00011259
T(24)	0	0	0	0	0	0	0	0	0	0.000292733	0	0	0	0	0	0	0	0	0	0
A(152)	0	0	0	0	0	0	0	0	0	0	0	0	0	0	0	0.000202662	0	0	0	6.75539e-05
S(187)	0	0	0	0	0	0	0	0	0	0	0.000270215	0	0	0	0	0	0	0	0	0
A(359)	0	0	0	0	0	0	0	0	0	0	0	0	0	0	0	0.000202662	2.2518e-05	0	0	4.50359e-05
G(179)	0	0	0	0.000157626	4.50359e-05	0	0	0	0	0	0	0	0	0	0	4.50359e-05	0	0	0	2.2518e-05
E(136)	0	0	0	0.00022518	0	0	0	2.2518e-05	0	0	0	2.2518e-05	0	0	0	0	0	0	0	0
A(208)	0	0	0	0	0	0	0	4.50359e-05	0	0	0	0	0	0	0	0.000135108	0	0	0	9.00718e-05
L(219)	0	0	0	0	0	0	0	0	0	0	0	0	0	0.000247698	0	0	0	0	0	0
T(271)	0	0	0	0	0	0	0	0	0	0.000247698	0	0	0	0	0	0	0	0	0	0
V(246)	0	0	0	0	0	0	0	0	0	0.000247698	0	0	0	0	0	0	0	0	0	0
P(368)	0	0	0	0	0	0	0	0	0	0	0.000135108	0	0	0	0	6.75539e-05	2.2518e-05	0	0	0
A(173)	0	0	0	0	0	0	0	0	0	0	0	0	0	0	0	0	0	0	0	0.00022518
P(279)	0	0	0	0	0	0	4.50359e-05	0	0	0	9.00718e-05	0	0	0	0	9.00718e-05	0	0	0	0
T(198)	2.2518e-05	0	0	0	0	0	0	0	0	0.000202662	0	0	0	0	0	0	0	0	0	0

## Sheet: South America
	A	R	N	D	C	E	Q	G	H	I	L	K	M	F	P	S	T	W	Y	V
R(203)	0	0	0	0	0	0	0	1.52932e-05	0	0.000328804	0	0.570047	0.357066	0	0	3.8233e-05	1.52932e-05	0	0	3.05864e-05
G(204)	7.6466e-06	0.568563	0	0	0	3.05864e-05	0.000175872	0	0	0	0.000665255	0	7.6466e-06	0	0.000611728	0	0	0	0	4.58796e-05
P(80)	1.52932e-05	0.418422	0	0	0	0	7.6466e-06	0	0	0	4.58796e-05	0	0	0	0	0.000107052	0	0	0	0
D(377)	2.29398e-05	0	2.29398e-05	0	0	4.58796e-05	0	9.94059e-05	1.52932e-05	0	0	0	0	0	0	0	0	0	0.362281	2.29398e-05
D(63)	0	0	6.88194e-05	0	1.52932e-05	0	0	0.355774	3.05864e-05	0	0	0	0	0	0	0.000282924	0	0	0.000122346	0
G(215)	0.000160579	0	0	0	0.349228	0	0	0	0	0	0	0	0	4.58796e-05	0	0.000168225	0	0	6.11728e-05	0.000688194
Q(9)	0	2.29398e-05	0	0	0	7.6466e-06	0	0	0.00152932	0	0.0439527	7.6466e-06	0	0	0	0	0	0	0	0
T(205)	0.000107052	0	0.000237045	0	0	0	0	0	0	0.0445262	0	0	0	0	0	3.05864e-05	0	0	0	0
P(13)	0	0	0	0	0	0	0	0	7.6466e-06	7.6466e-06	0.0358014	0	0	8.41126e-05	0	0.00128463	0.00100171	0	0	0
G(214)	0	0	0	1.52932e-05	0.0333163	0	0	0	0	0	0	0	0	0	0	0.000519969	0	0	0	0.000129992
M(234)	0	0	0	0	0	0	0	0	0	0.0327657	3.8233e-05	0	0	0	0	0	1.52932e-05	0	0	6.88194e-05
A(119)	0	0	0	0	0	0	0	0	0	0	0	0	0	3.05864e-05	0.00285218	0.0260367	1.52932e-05	0	0	7.6466e-06
I(292)	0	0	0	0	0	0	0	0	0	0	0	0	0	0	0	0	0.0268166	0	0	0.000305864
D(3)	0	0	0.000267631	0	0	1.52932e-05	3.8233e-05	1.52932e-05	3.05864e-05	0	0.0146203	0	0	0	0	0	0	0	9.94059e-05	1.52932e-05
S(235)	0	0	0	0	0	0	0	0	0	0	0	0	0	0.0148191	1.52932e-05	0	0	0	2.29398e-05	0
L(230)	0	0	0	0	0	0	0	0	0	0	0	0	0	0.014238	0	0	0	0	0	0
T(366)	7.6466e-06	7.6466e-06	0	0	0	0	0	0	0	0.013481	0	0	0	0	3.05864e-05	7.6466e-06	0	0	0	0
S(197)	2.29398e-05	0	0	0	0	0	0	0	0	0	0.00899241	0	0	0	8.41126e-05	0	3.05864e-05	0	0	0
P(383)	7.6466e-06	0	0	0	0	0	2.29398e-05	0	0	0	0.00637727	0	0	0	0	0.000542909	3.8233e-05	0	0	0
P(199)	0	0	0	0	0	0	0	0	0	0	0.00369331	0	0	0	0	0.00222516	3.05864e-05	0	0	0
D(402)	7.6466e-06	0	0	0	0	1.52932e-05	0	3.05864e-05	5.35262e-05	0	0	0	0	0	0	0	0	0	0.00564319	7.6466e-06
S(327)	2.29398e-05	0	0	0	0	0	0	0	0	0	0.00571966	0	0	0	0	0	0	0	0	0
T(379)	6.11728e-05	0	6.88194e-05	0	0	0	0	0	0	0.00471795	0	0	0	0	0	0.000183519	0	0	0	0
S(2)	7.6466e-06	0	0	0	0	0	0	0	0	0	0	0	0	0.000680548	1.52932e-05	0	0	0	0.00424387	0
T(391)	7.6466e-06	0	3.05864e-05	0	0	0	0	0	0	0.00393035	0	0	0	0	0	5.35262e-05	0	0	0	0
G(238)	0	0	7.6466e-06	2.29398e-05	0.00369331	0	0	0	0	0	0	0	0	0	0	4.58796e-05	0	0	0	0.000107052
T(135)	7.6466e-06	0	3.05864e-05	0	0	0	0	0	0	0.00347156	0	0	0	0	1.52932e-05	0	0	0	0	0
H(300)	0	3.8233e-05	0	0	0	0	1.52932e-05	0	0	0	1.52932e-05	0	0	0	0	0	0	0	0.00276807	0
S(413)	0	3.8233e-05	0.000152932	0	0	0	0	0.00038233	0	0.0021487	0	0	0	0	0	0	7.6466e-06	0	0	0
K(373)	0	4.58796e-05	0.00252338	0	0	0	0	0	0	0	0	0	1.52932e-05	0	0	0	1.52932e-05	0	0	0
R(195)	0	0	0	0	0	0	0	4.58796e-05	0	0.000688194	7.6466e-06	0.00130757	0	0	0	8.41126e-05	0.000206458	0	0	0
P(365)	2.29398e-05	0	0	0	0	0	0	0	0	0	0.000749367	0	0	0	0	0.00151403	7.6466e-06	0	0	0
A(208)	0	0	0	2.29398e-05	0	0	0	0	0	0	0	0	0	0	0	0.00171284	4.58796e-05	0	0	0.000497029
A(220)	0	0	0	0	0	0	0	0	0	0	0	0	0	0	0	2.29398e-05	7.6466e-06	0	0	0.00220222
P(6)	0	0	0	0	0	0	0	0	0.000642315	0	0.00122346	0	0	0	0	0.000107052	0.000175872	0	0	0
P(151)	0	0	0	0	0	0	0	0	4.58796e-05	0	0.000321157	0	0	7.6466e-06	0	0.00163637	2.29398e-05	0	0	0
T(362)	7.6466e-05	0	0	0	0	0	0	0	0	0.00181225	0	0.000122346	0	0	0	0	0	0	0	0
Q(229)	0	6.88194e-05	0	0	0	0	0	0	0.00194224	0	0	0	0	0	0	0	0	0	0	0
S(193)	0	1.52932e-05	0.000152932	0	7.6466e-06	0	0	6.11728e-05	0	0.00136874	0	0	0	0	0	0	0.000374684	0	0	0
P(368)	0	0	0	0	0	0	7.6466e-06	0	2.29398e-05	0	0.0012464	0	0	0	0	0.000619375	3.05864e-05	0	0	0
A(267)	0	0	0	0	0	1.52932e-05	0	0	0	0	0	0	0	0	0	0.000145285	3.8233e-05	0	0	0.00171284
A(211)	0	0	0	2.29398e-05	0	0	0	0	0	0	0	0	0	0	0	0.000779954	0.000550556	0	0	0.000550556
G(18)	2.29398e-05	7.6466e-06	0	3.05864e-05	0.000237045	0	0	0	0	0	0	0	0	0	0	7.6466e-05	0	0	0	0.00148344
G(179)	0	0	0	6.11728e-05	0.000114699	0	0	0	0	0	0	0	0	0	0	0.0014605	0	0	0	4.58796e-05
Q(70)	0	0.000321157	0	0	0	0	0	0	3.05864e-05	0	0	0.00129992	0	0	0	0	0	0	0	0
M(210)	0	0	0	0	0	0	0	0	0	0.00137639	2.29398e-05	0	0	0	0	0	7.6466e-05	0	0	0.000129992
R(209)	0	0	0	0	0	0	0	1.52932e-05	0	0.000558202	0	0.000741721	0	0	0	2.29398e-05	0.000252338	0	0	0
P(326)	0	7.6466e-06	0	0	0	0	0	0	6.11728e-05	0	0.000367037	0	0	0	0	0.00113934	7.6466e-06	0	0	0
N(8)	0	0	0	0.000252338	7.6466e-06	0	0	0	0.000619375	7.6466e-05	0	0	0	0	0	0.000229398	7.6466e-06	0	0.000344097	0
G(34)	2.29398e-05	3.05864e-05	0	0	0	4.58796e-05	0	0	0	0	0	0	0	0	0	0	0	0.001017	0	0.000420563
A(35)	0	0	0	0	0	0	0	0	0	0	0	0	0	0	0	0.000152932	0.000328804	0	0	0.000978765
G(243)	0	0	0	0	0.00121581	1.52932e-05	0	0	0	0	0	0	0	0	0	0.000206458	0	0	0	7.6466e-06
P(279)	0	0	0	0	0	0	0.000642315	0	0	0	0.000221752	0	0	0	0	0.000558202	1.52932e-05	0	0	0
A(182)	0	0	0	0	0	0	0	0	0	0	0	0	0	0	7.6466e-06	0.00119287	0.000152932	0	0	6.88194e-05
S(194)	1.52932e-05	0	0	0	0	0	0	0	0	0	0.00118522	0	0	0	0.000206458	0	0	0	0	0
P(142)	0	0	0	0	0	0	4.58796e-05	0	0	0	0	0	0	0	0	0.00131522	3.05864e-05	0	0	0
A(152)	0	0	0	0	0	0	0	0	0	0	0	0	0	0	0	0.000917593	3.05864e-05	0	0	0.000435856
V(270)	0	0	0	0	0	0	0	0	0	0.000122346	0.00126169	0	0	0	0	0	0	0	0	0
D(144)	3.05864e-05	0	3.8233e-05	0	0	0	0	9.17593e-05	0.000305864	0	0	0	0	0	0	0	0	0	0.000871713	7.6466e-06
P(67)	7.6466e-06	0	0	0	0	0	0	0	0.000183519	0	0.00042821	0	0	0	0	0.000672901	5.35262e-05	0	0	0
D(288)	0	0	0.00133051	0	0	0	0	0	0	0	0	0	0	0	0	0	0	0	0	0
A(90)	0	0	0	0	0	0	0	0	0	0	0	0	0	0	0	0.000902299	0.000321157	0	0	8.41126e-05
M(322)	0	0	0	0	0	0	0	0	0	0.00103229	0.000107052	0	0	0	0	0	7.6466e-06	0	0	2.29398e-05
D(401)	3.8233e-05	0	0.000152932	0	0	0	0	2.29398e-05	0	0	0	0	0	0	0	0	0	0	0.000955826	0
T(24)	7.6466e-06	0	9.94059e-05	0	0	0	0	0	0	0.00100935	0	0	0	0	0	0	0	0	0	0
D(128)	0	0	3.05864e-05	0	0	0.000741721	0	2.29398e-05	9.94059e-05	0	0	0	0	0	0	0	0	0	0.000221752	0
A(398)	0	0	0	0	0	0	0	0	0	0	0	0	0	0	0	0.000237045	1.52932e-05	0	0	0.00085642
R(14)	0	0	0	0	0.000657608	0	0	1.52932e-05	0.000137639	0	0.000214105	0	0	7.6466e-06	0	4.58796e-05	0	0	0	0
T(334)	2.29398e-05	4.58796e-05	0	0	0	0	0	0	0	0.000940532	0	7.6466e-06	0	0	0	3.8233e-05	0	0	0	0
A(12)	0	0	0	0	0	1.52932e-05	0	1.52932e-05	0	0	0	0	0	0	3.05864e-05	0.000718781	0.000183519	0	0	9.17593e-05
G(147)	0	0	0	7.6466e-06	0	0	0	0	0	0	0	0	0	0	0	0.00104758	0	0	0	0
S(201)	0	0	0.000818187	0	3.05864e-05	0	0	7.6466e-05	0	9.17593e-05	0	0	0	0	0	0	0	0	0	0
G(120)	9.94059e-05	0.000412917	0	0	0	0.000191165	0	0	0	0	0	0	0	0	0	0	0	0	0	0.000305864
A(156)	0	0	0	0	0	0	0	7.6466e-06	0	0	0	0	0	0	0	0.000948179	0	0	0	0
P(168)	7.6466e-06	0	0	0	0	0	0.000282924	0	0	0	0	0	0	0	0	0.000642315	1.52932e-05	0	0	0
A(251)	0	0	0	0	0	0	0	0	0	0	0	0	0	0	0	0.000267631	0	0	0	0.000649961
Q(418)	0	4.58796e-05	0	0	0	0	0	0	0.000703488	0	9.94059e-05	7.6466e-06	0	0	2.29398e-05	0	0	0	0	0
D(399)	0	0	0.000328804	0	0	7.6466e-06	0	0	0.000168225	0	0	0	0	0	0	0	0	0	0.000351744	7.6466e-06
Q(289)	0	7.6466e-06	0	0	0	0	0	0	0.000757014	0	8.41126e-05	0	0	0	0	0	0	0	0	0
A(414)	0	0	0	7.6466e-06	0	0	0	0	0	0	0	7.6466e-06	0	0	0	0.000711134	2.29398e-05	0	0	9.17593e-05
V(72)	0	0	0	0	0	0	0	0	0	0.000795247	3.05864e-05	0	0	0	0	0	0	0	0	0
P(364)	1.52932e-05	0	0	0	0	0	0	0	0	0	0.000474089	0	0	0	0	0.000328804	7.6466e-06	0	0	0
S(202)	7.6466e-06	1.52932e-05	0.000107052	0	0.000259985	0	0	1.52932e-05	0	6.88194e-05	0	0	0	0.000206458	2.29398e-05	0	8.41126e-05	0	0	0
A(381)	0	0	0	0	0	0	0	0	0	1.52932e-05	0	0	0	0	1.52932e-05	0.000527616	0.000137639	0	0	9.17593e-05
S(37)	0.000145285	0	0	0	0	0	0	0	0	0	7.6466e-06	0	0	0	0.000627022	0	0	0	0	0
P(207)	0	7.6466e-06	7.6466e-06	0	0	0	7.6466e-06	0	1.52932e-05	0	0.000129992	0	0	0	0	0.000596435	0	0	0	0
A(252)	0	0	0	0	0	0	0	1.52932e-05	0	0	0	0	0	0	0	0.000565849	3.05864e-05	0	0	0.000137639
Q(241)	0	1.52932e-05	0	0	0	0	0	0	0.000229398	0	7.6466e-06	0.000489383	0	0	0	0	0	0	0	0
G(236)	0	0	0	2.29398e-05	0.000206458	0	0	0	0	0	0	0	0	0	0	5.35262e-05	0	0	0	0.000443503
R(40)	0	0	7.6466e-06	0	0.000397623	0	0	0	0.000183519	0	0.000107052	0	0	0	7.6466e-06	7.6466e-06	0	0	0	0
Q(389)	0	1.52932e-05	0	0	0	7.6466e-06	0	0	0.000573495	0	7.6466e-05	0	0	0	3.8233e-05	0	0	0	0	0
P(344)	0	0	0	0	0	0	0	0	0	0	0.000229398	0	0	0	0	0.000435856	2.29398e-05	0	0	0
E(378)	0	0	0	8.41126e-05	0	0	0.000519969	6.11728e-05	0	0	0	0	0	0	0	0	0	0	0	1.52932e-05
A(155)	0	0	0	0	0	0	0	7.6466e-06	0	0	0	0	0	0	0	3.8233e-05	0	0	0	0.000634668
A(359)	0	0	0	0	0	0	0	0	0	0	0	0	0	0	0	0.000581142	7.6466e-05	0	0	0
G(212)	0	3.05864e-05	0	2.29398e-05	0.000221752	0	0	0	0	0	0	0	0	0	0	6.88194e-05	0	0	0	0.000290571
A(308)	0	0	0	0	0	0	0	0	0	0	0	0	0	0	0	0.000634668	0	0	0	0
D(103)	6.88194e-05	0	0.000145285	0	0	0	0	1.52932e-05	1.52932e-05	0	0	0	0	0	0	0	0	0	0.00038233	7.6466e-06
K(387)	0	0.000466443	0.000145285	0	0	0	0	0	0	0	0	0	0	0	0	0	0	0	0	0
P(46)	0	0	0	0	0	0	0	0	0	0	5.35262e-05	0	0	0	0	0.000550556	7.6466e-06	0	0	0
