# Supplementary material for: Mutations in SARS-CoV-2 structural proteins: a global analysis
Source: Virol J. 2022 Dec 18;19:220. doi: 10.1186/s12985-022-01951-7 (PMC9759450; doi:10.1186/s12985-022-01951-7)
Supplement: Supplementary file 5 — Additional file 5: Evolutionary trends of the E protein mutation distribution based on the time and geographical areas. [file 12985_2022_1951_MOESM5_ESM.xlsx]

## Sheet: Total
	2019-11-30	2019-12-31	2020-01-31	2020-02-29	2020-03-31	2020-04-30	2020-05-31	2020-06-30	2020-07-31	2020-08-31	2020-09-30	2020-10-31	2020-11-30	2020-12-31	2021-01-31	2021-02-28	2021-03-31	2021-04-30	2021-05-31	2021-06-30	2021-07-31	2021-08-31	2021-09-30	2021-10-31	2021-11-30
T(9)		0	0.000665	0	0.000127	0.000638	0.001146	0.000932	0.001337	0.000849	0.00122	0.002078	0.001302	0.00201	0.003326	0.001686	0.001592	0.001179	0.001043	0.000528	0.000601	0.000732	0.000771	0.000633	0.069385
P(71)		0	0.002495	0.001181	0.000419	0.000833	0.001529	0.007893	0.009242	0.002765	0.00628	0.005147	0.009362	0.014197	0.01512	0.01967	0.025787	0.019527	0.015807	0.013061	0.005758	0.001444	0.001341	0.001362	0.001357
V(62)		0	0.000166	0	0.000182	0.00023	0.000764	0.000994	0.000287	0.000897	0.000949	0.001249	0.001041	0.00131	0.00096	0.000754	0.001308	0.001389	0.001747	0.00192	0.002559	0.00192	0.003595	0.005819	0.004753
L(21)		0	0.001996	0	0.000255	0.000549	0.000208	9.3e-05	0.000573	0.000267	0.000452	0.000774	0.002401	0.003223	0.004412	0.006529	0.007521	0.006655	0.004045	0.002182	0.000694	0.000368	0.000552	0.000726	0.000733
V(58)		0	0.000166	0	0.0002	0.000337	0.001946	0.001119	0.001672	0.000995	0.000452	0.000421	0.00053	0.001056	0.001196	0.001194	0.001289	0.001278	0.001873	0.001115	0.003547	0.002274	0.001705	0.001296	0.000934
L(73)		0	0.001996	0	0.000819	0.001506	0.000973	0.000808	0.001218	0.000776	0.000746	0.001426	0.001735	0.001365	0.001774	0.001936	0.001196	0.001315	0.002055	0.001504	0.000851	0.000758	0.00116	0.001226	0.00123
S(68)		0	0.002495	0.005313	0.001438	0.001861	0.00337	0.00174	0.002555	0.002401	0.002982	0.001888	0.001369	0.001667	0.001399	0.001552	0.001232	0.001583	0.001121	0.00082	0.000476	0.000513	0.000744	0.000994	0.001034
S(55)		0	0.000333	0	0.0002	8.9e-05	0.001181	0.000249	9.6e-05	0.000364	0.000158	0.000693	0.000665	0.000693	0.000645	0.000489	0.000434	0.000344	0.000401	0.000535	0.000762	0.000926	0.000944	0.001171	0.001308
V(49)		0	0.000499	0	0.000164	0.000177	0.000313	0.002237	0.002507	0.000825	0.000271	8.1e-05	0.000309	0.000192	0.000435	0.000593	0.000484	0.000527	0.000761	0.000867	0.000441	0.000498	0.000545	0.000525	0.000327
A(41)		0	0	0	5.5e-05	0.000213	0.000104	0.000155	0.000167	4.9e-05	0.000136	9.5e-05	0.000116	0.000178	0.000316	0.000354	0.000346	0.000317	0.000246	0.000288	0.000449	0.000368	0.00057	0.000693	0.000819
V(24)		0	0.000166	0	0.0004	0.000284	0.000347	0.000218	0.000669	0.000267	0.000203	0.000136	0.000588	0.000315	0.000332	0.000496	0.000932	0.000587	0.000539	0.000426	0.000261	0.00037	0.000429	0.000419	0.000476
D(72)		0	0.000499	0.00059	0.000255	0.000514	6.9e-05	0.000218	4.8e-05	0.002013	0.000361	0.000638	0.001147	0.000905	0.00105	0.001101	0.000643	0.00046	0.000366	0.00039	0.000331	0.000274	0.000283	0.000249	0.000317
R(69)		0	0.000166	0	0.000164	0.00023	0.001216	0.001833	0.000334	0.000146	0.000271	0.001005	0.00053	0.000206	0.000429	0.000213	0.000729	0.000721	0.000512	0.000357	0.000292	0.00031	0.000278	0.000304	0.000234
T(30)		0	0.000832	0.001181	9.1e-05	0.000408	0.000799	0.000808	0.000406	0.000922	0.000542	0.000177	0.000231	0.000233	0.000375	0.000321	0.000531	0.000529	0.000383	0.000277	7.5e-05	6.9e-05	8e-05	0.000115	0.000121
V(5)		0	0	0	3.6e-05	0.000248	0.000208	0.00028	0.00031	0.001213	6.8e-05	0.000136	0.000704	0.000672	0.000339	0.000116	0.000183	0.000132	0.000132	0.000219	0.00013	0.000192	0.00021	0.000288	0.000184
V(52)		0	0	0	7.3e-05	3.5e-05	6.9e-05	0	7.2e-05	7.3e-05	2.3e-05	1.4e-05	8.7e-05	6.9e-05	0.000173	0.000213	0.000315	0.00015	5.1e-05	6.2e-05	0.000242	0.000309	0.00039	0.000233	0.000102
V(70)		0	0.000166	0	5.5e-05	3.5e-05	6.9e-05	6.2e-05	4.8e-05	4.9e-05	0.000113	9.5e-05	0.000212	0.000144	0.000179	0.000201	0.000157	0.000143	0.000135	0.000189	7e-05	8.8e-05	0.000182	0.000277	0.000399
N(66)		0	0	0	1.8e-05	0.000124	0.000208	3.1e-05	2.4e-05	7.3e-05	0	4.1e-05	0.000154	3.4e-05	4.7e-05	4.9e-05	0.000105	6.9e-05	8.7e-05	4.4e-05	3.3e-05	8.5e-05	0.000305	0.00053	0.000327
E(8)		0	0.000166	0	3.6e-05	5.3e-05	6.9e-05	6.2e-05	9.6e-05	0.000606	0.00052	0.000312	0.000347	0.000151	0.000229	0.000194	0.000112	0.000106	9.6e-05	0.000197	0.000153	0.000109	0.000152	0.000202	0.000147
R(61)		0	0.000333	0	0.000164	1.8e-05	0.000104	3.1e-05	0.000287	0.000146	2.3e-05	0.000163	0.000299	8.2e-05	8.3e-05	7.5e-05	7.4e-05	0.000106	0.000156	0.000193	0.000135	0.000152	0.000235	0.000144	0.000171
F(20)		0	0.000166	0	0	0.00023	0	0.000124	7.2e-05	0	4.5e-05	0.001154	0.000318	0.000137	9e-05	0.000146	8.8e-05	6.5e-05	3.6e-05	2.2e-05	8e-06	0.00011	9.8e-05	0.000316	0.000167
L(51)		0	0	0	0	0	0.000139	9.3e-05	0.000215	0.000218	0.000249	0.000896	0.000511	0.000151	0.00011	0.000146	0.000167	0.000129	0.000123	7.3e-05	7.9e-05	9.6e-05	0.000182	9.6e-05	9.5e-05
C(43)		0	0.000166	0	1.8e-05	0.000106	0.000208	9.3e-05	0.000215	0.000146	0.000339	0.000149	0.000202	5.5e-05	5.3e-05	0.000101	9.5e-05	6.9e-05	6e-05	0.000197	0.000182	0.000184	0.000132	9.6e-05	0.000147
S(67)		0	0.000333	0	0	3.5e-05	0	3.1e-05	2.4e-05	2.4e-05	9e-05	0.000611	0.00027	0.000137	8.6e-05	4.5e-05	4.1e-05	9.5e-05	0.000105	0.000211	0.000234	0.00012	0.00013	0.000157	9.3e-05
S(16)		0	0	0	1.8e-05	0.000106	0	0	7.2e-05	0	2.3e-05	4.1e-05	1e-05	0.000117	9.6e-05	6.7e-05	8.3e-05	4.6e-05	8.1e-05	6.6e-05	8.9e-05	0.000105	0.000112	0.000164	0.000261
F(26)		0	0	0	0	0.000177	0.000174	0	0.000119	0.000267	0.000271	0.000312	5.8e-05	4.8e-05	0.000126	7.5e-05	9.1e-05	0.000164	9.3e-05	5.8e-05	0.000172	0.00017	0.000101	0.0001	0.000106
L(19)		0	0	0	3.6e-05	5.3e-05	3.5e-05	3.1e-05	9.6e-05	9.7e-05	2.3e-05	9.5e-05	3.9e-05	0.000123	7.3e-05	0.000101	0.000133	0.00018	0.000198	0.000178	2.7e-05	5.5e-05	8.5e-05	0.000121	0.000182
V(75)		0	0	0.00059	0	0.000213	0.000486	6.2e-05	0.000621	0.000388	2.3e-05	8.1e-05	0.000106	0.00011	0.000183	0.000168	0.00011	0.000141	6.3e-05	8e-05	0.00012	6.1e-05	5.8e-05	3.7e-05	5.3e-05
K(53)		0	0	0	0	0	0.000104	0.000466	9.6e-05	0	0	4.1e-05	0	2.1e-05	2.7e-05	1.9e-05	4.3e-05	2.1e-05	6e-06	7e-06	2e-06	2.3e-05	4.6e-05	0.000275	0.000258
N(64)		0	0	0	3.6e-05	8.9e-05	0.000104	6.2e-05	0	0	6.8e-05	0.000177	3.9e-05	3.4e-05	5.3e-05	0.00016	0.000164	0.000139	0.00012	4e-05	2.3e-05	2.3e-05	6.1e-05	6.3e-05	7.8e-05
I(46)		0	0.000333	0.00059	0	0	0.000139	0	2.4e-05	4.9e-05	9e-05	0.000543	0.000357	6.2e-05	3.3e-05	5.6e-05	5.7e-05	3.5e-05	1.5e-05	4e-06	7e-05	5e-05	0.000132	0.000113	5e-05
L(74)		0	0	0	3.6e-05	1.8e-05	3.5e-05	0	0.000358	0.000534	9e-05	2.7e-05	4.8e-05	8.2e-05	0.000103	5.6e-05	5e-05	9e-05	0.000102	6.6e-05	4.8e-05	5.9e-05	6.1e-05	6e-05	7.4e-05
S(50)		0	0	0	5.5e-05	3.5e-05	6.9e-05	0	0	0.000291	4.5e-05	2.7e-05	5.8e-05	4.8e-05	3.3e-05	3.4e-05	5.5e-05	4.4e-05	6.9e-05	9.1e-05	4.6e-05	0.00011	0.000115	8.1e-05	5.1e-05
C(44)		0	0	0	0	3.5e-05	0	3.1e-05	0	0	4.5e-05	5.4e-05	2.9e-05	4.8e-05	2.7e-05	6.7e-05	0.000114	8.6e-05	2.1e-05	1.8e-05	3.3e-05	1.8e-05	4.8e-05	6e-05	0.000144
G(10)		0	0	0	1.8e-05	7.1e-05	0	0	4.8e-05	9.7e-05	2.3e-05	2.7e-05	8.7e-05	3.4e-05	3.3e-05	6e-05	6.9e-05	3.5e-05	3.9e-05	6.2e-05	8.7e-05	0.00011	4.6e-05	6.5e-05	5.6e-05
I(13)		0	0.000166	0	3.6e-05	0	0	3.1e-05	0.000263	4.9e-05	0	1.4e-05	1e-05	2.1e-05	9.3e-05	6e-05	4.5e-05	0.000215	0.000132	9.5e-05	4.4e-05	4.1e-05	6e-05	2.4e-05	2.4e-05
A(22)		0	0	0	5.5e-05	1.8e-05	3.5e-05	9.3e-05	0.000143	0.000146	6.8e-05	1.4e-05	3.9e-05	6.2e-05	4.7e-05	3e-05	4.3e-05	6e-05	4.5e-05	8e-05	4.3e-05	5.2e-05	7e-05	8.6e-05	5.7e-05
F(23)		0	0	0	0	3.5e-05	3.5e-05	0	0	0.000218	0	2.7e-05	1.9e-05	6.2e-05	0.000156	4.5e-05	3.1e-05	1.6e-05	1.2e-05	1.1e-05	6.6e-05	5.3e-05	6.7e-05	8.9e-05	4.3e-05
F(4)		0	0	0	1.8e-05	1.8e-05	3.5e-05	0	2.4e-05	0.000146	4.5e-05	1.4e-05	3.9e-05	3.4e-05	2.3e-05	2.2e-05	2.1e-05	5e-06	5.7e-05	2.2e-05	2.3e-05	1.3e-05	2.7e-05	0.00011	0.000141
L(37)		0	0.000333	0	5.5e-05	1.8e-05	3.5e-05	9.3e-05	7.2e-05	7.3e-05	9e-05	8.1e-05	0.000116	0.000144	5e-05	8.2e-05	6.7e-05	2.8e-05	2.1e-05	4.7e-05	2.9e-05	5e-05	4.8e-05	3.9e-05	5.7e-05
S(3)		0	0	0	0	5.3e-05	0	3.1e-05	2.4e-05	0	4.5e-05	1.4e-05	1e-05	3.4e-05	8.3e-05	9.7e-05	8.1e-05	4.9e-05	3e-05	1.8e-05	2.7e-05	4.7e-05	3.9e-05	3.4e-05	8.6e-05
I(33)		0	0.000166	0	0	0	3.5e-05	0	0	0.000121	4.5e-05	0	0.000125	9.6e-05	5.6e-05	3.4e-05	3.1e-05	4.4e-05	3.6e-05	2.5e-05	2.1e-05	3.3e-05	2.7e-05	8.3e-05	8.4e-05
E(7)		0	0	0	3.6e-05	5.3e-05	3.5e-05	3.1e-05	0	7.3e-05	4.5e-05	1.4e-05	4.8e-05	6.9e-05	7.3e-05	8.2e-05	4.1e-05	1.2e-05	3.3e-05	1.5e-05	3.1e-05	2.7e-05	5.8e-05	3.6e-05	7.7e-05
V(14)		0	0.000166	0	0	0	0	3.1e-05	0	2.4e-05	0	0	1e-05	2.1e-05	2.7e-05	1.9e-05	5e-05	9.7e-05	4.8e-05	3.6e-05	3.1e-05	3.5e-05	0.0001	2.4e-05	3.7e-05
L(18)		0	0.000333	0	3.6e-05	1.8e-05	0	0	0	7.3e-05	0	4.1e-05	1e-05	0.000171	3.7e-05	4.5e-05	0.000133	6.7e-05	3.9e-05	1.1e-05	1e-05	2.2e-05	2.5e-05	3.7e-05	4.3e-05
A(36)		0	0	0.00059	1.8e-05	7.1e-05	3.5e-05	0	0	2.4e-05	9e-05	6.8e-05	3.9e-05	6.2e-05	3.3e-05	3.4e-05	5e-05	4.9e-05	4.5e-05	5.5e-05	2.7e-05	4e-05	4.2e-05	3.7e-05	4.3e-05
T(11)		0	0	0	1.8e-05	1.8e-05	0	0	2.4e-05	0	0	5.4e-05	0.000183	2.7e-05	1.3e-05	3e-05	4.3e-05	3.2e-05	2.4e-05	4.4e-05	1.9e-05	4e-05	3.7e-05	2.4e-05	4.4e-05
L(27)		0	0	0	1.8e-05	3.5e-05	6.9e-05	3.1e-05	7.2e-05	4.9e-05	2.3e-05	6.8e-05	1.9e-05	2.7e-05	1.7e-05	9e-05	2.9e-05	3.2e-05	2.7e-05	3.6e-05	1.7e-05	1.6e-05	2.5e-05	3.9e-05	2.6e-05
V(47)		0	0	0	0	8.9e-05	0.000174	0	4.8e-05	0	0	5.4e-05	0.000106	5.5e-05	2.3e-05	7e-06	1.9e-05	2.8e-05	2.1e-05	3.3e-05	2.7e-05	3e-05	2.4e-05	2.9e-05	1.8e-05
S(60)		0	0	0	1.8e-05	0	0	3.1e-05	0	0.000194	0	5.4e-05	0	4.1e-05	1.3e-05	5.2e-05	3.3e-05	1.6e-05	3.3e-05	1.1e-05	1.5e-05	1.8e-05	2.8e-05	3.1e-05	3.3e-05
S(6)		0	0.000166	0	0	0	0.000104	9.3e-05	9.6e-05	7.3e-05	0	0	1.9e-05	2.7e-05	4.3e-05	1.9e-05	6.9e-05	3.2e-05	1.2e-05	1.5e-05	2.3e-05	1.2e-05	2.4e-05	3.9e-05	5e-06
F(56)		0	0	0	1.8e-05	8.9e-05	3.5e-05	0	2.4e-05	2.4e-05	2.3e-05	0	2.9e-05	3.4e-05	4.3e-05	6.7e-05	4.1e-05	7e-06	1.8e-05	1.8e-05	1.5e-05	1.9e-05	1.5e-05	2.8e-05	2.1e-05
Y(42)		0	0	0	0	3.5e-05	0	3.1e-05	2.4e-05	0	0	0	1.9e-05	7e-06	1e-05	4e-06	1.7e-05	1.4e-05	9e-06	2.2e-05	1.2e-05	1.2e-05	1e-06	2.1e-05	2.6e-05
C(40)		0	0	0	0	1.8e-05	0	0	0	2.4e-05	0	1.4e-05	1e-05	0	3e-06	0	1.2e-05	1.2e-05	4.5e-05	1.1e-05	2.5e-05	2.4e-05	1.2e-05	1.6e-05	5e-06
A(32)		0	0	0	0	0	6.9e-05	3.1e-05	2.4e-05	2.4e-05	0	0	1e-05	2.1e-05	1.7e-05	6e-05	2.1e-05	1.8e-05	2.1e-05	3.3e-05	1.7e-05	6e-06	6e-06	3e-06	5e-06
L(65)		0	0	0	1.8e-05	1.8e-05	0	0	0	2.4e-05	0	0	0	7e-06	3e-06	1.5e-05	2e-06	2e-06	1.5e-05	3.6e-05	2.9e-05	1.8e-05	1.2e-05	1.3e-05	1.5e-05
V(25)		0	0	0	9.1e-05	1.8e-05	0	0.000435	0	4.9e-05	0	0	0	1.4e-05	7e-06	4e-06	1e-05	5e-06	9e-06	1.1e-05	1e-05	1.2e-05	1.5e-05	1.8e-05	1e-05
N(45)		0	0	0	0	3.5e-05	0	3.1e-05	0	7.3e-05	2.3e-05	1.4e-05	0	0	1e-05	0	7e-06	7e-06	6e-06	1.1e-05	2.5e-05	1.7e-05	3.3e-05	6e-06	7e-06
K(63)		0	0	0	3.6e-05	3.5e-05	3.5e-05	3.1e-05	0	0	0	0	1e-05	0	7e-06	7e-06	2e-06	7e-06	3e-06	7e-06	1.7e-05	3.4e-05	1.5e-05	5e-06	7e-06
V(29)		0	0	0.00059	0	0	0	0	0	0	0	1.4e-05	1e-05	7e-06	1e-05	1.1e-05	5e-06	0	2.1e-05	1.5e-05	8e-06	1.5e-05	6e-06	2.6e-05	1.4e-05
N(48)		0	0	0	0	0	6.9e-05	0	0	0	6.8e-05	0	1e-05	7e-06	1.3e-05	3.7e-05	7e-06	7e-06	9e-06	2.2e-05	1.7e-05	2.1e-05	1e-06	5e-06	5e-06
P(54)		0	0.000333	0	1.8e-05	1.8e-05	0	6.2e-05	2.4e-05	2.4e-05	0	2.7e-05	1.9e-05	2.1e-05	1e-05	0	1.4e-05	1.4e-05	9e-06	7e-06	8e-06	1.3e-05	4e-06	8e-06	8e-06
Y(57)		0	0	0	0	0	0	0	0	0	0	0	0	0	0	7e-06	5e-06	5e-06	0	4e-06	2e-06	4e-06	1e-06	0	4.3e-05
V(17)		0	0	0	1.8e-05	1.8e-05	0	0	4.8e-05	0	0	2.7e-05	0	3.4e-05	1e-05	4e-06	7e-06	7e-06	3e-06	7e-06	8e-06	1.5e-05	9e-06	0	5e-06
L(34)		0	0	0	1.8e-05	0	0	3.1e-05	0	2.4e-05	0	1.4e-05	0	0	3e-06	0	1.2e-05	5e-06	1.2e-05	1.1e-05	4e-06	4e-06	1e-05	1.6e-05	7e-06
L(28)		0	0	0	0	0	3.5e-05	0	0	0	0	0	0	0	3e-06	0	2e-06	5e-06	0	7e-06	1.2e-05	6e-06	6e-06	2.6e-05	8e-06
Y(59)		0	0	0	1.8e-05	1.8e-05	6.9e-05	0	0	0	0	0	0	1.4e-05	1e-05	0	7e-06	0	3e-06	7e-06	0	1.1e-05	1.9e-05	2e-06	4e-06
L(12)		0	0	0	0	1.8e-05	0	0	0	0	2.3e-05	0	0	0	3e-06	0	2e-06	2e-06	0	1.1e-05	6e-06	6e-06	1e-05	2e-06	5e-06
L(31)		0	0.000166	0	0	3.5e-05	3.5e-05	0	0	2.4e-05	0	1.4e-05	0	7e-06	0	4e-06	7e-06	2e-06	9e-06	7e-06	6e-06	5e-06	4e-06	2e-06	1e-06
Y(2)		0	0	0	1.8e-05	1.8e-05	0.000104	6.2e-05	0	0	0	1.4e-05	0	0	3e-06	0	5e-06	1.2e-05	1.2e-05	0	0	0	1e-06	2e-06	5e-06
T(35)		0	0	0	0	0	0	0	2.4e-05	0	0	0	0	0	0	4e-06	1.7e-05	5e-06	9e-06	7e-06	8e-06	6e-06	1e-06	2e-06	0
N(15)		0	0	0	1.8e-05	0	0	0	0	0	0	1.4e-05	0	0	0	4e-06	5e-06	1.2e-05	6e-06	7e-06	8e-06	4e-06	3e-06	0	2e-06
R(38)		0	0	0	0	0	0	0	0	0	0	0	0	0	3e-06	1.1e-05	7e-06	0	9e-06	7e-06	6e-06	2e-06	0	5e-06	2e-06
L(39)		0	0	0	1.8e-05	1.8e-05	0	0	2.4e-05	4.9e-05	0	0	0	0	3e-06	0	1e-05	2e-06	6e-06	4e-06	0	2e-06	0	2e-06	2e-06
M(1)		0	0	0	0	0	0	0	0	4.9e-05	0	0	0	7e-06	0	4e-06	0	5e-06	6e-06	7e-06	0	2e-06	0	0	0

## Sheet: Africa
	2019-11-30	2019-12-31	2020-01-31	2020-02-29	2020-03-31	2020-04-30	2020-05-31	2020-06-30	2020-07-31	2020-08-31	2020-09-30	2020-10-31	2020-11-30	2020-12-31	2021-01-31	2021-02-28	2021-03-31	2021-04-30	2021-05-31	2021-06-30	2021-07-31	2021-08-31	2021-09-30	2021-10-31	2021-11-30
P(71)			0	0	0	0	0.001159	0.003645	0.000989	0.010279	0.041436	0.076285	0.047722	0.215243	0.319777	0.322658	0.302251	0.367359	0.328108	0.305616	0.156474	0.042822	0.004841	0.002415	0.000494
L(21)			0.010417	0	0	0	0	0	0	0	0	0.003317	0.001085	0.01005	0.05376	0.104884	0.093962	0.054006	0.019037	0.011306	0.004209	0.001553	0.001614	0.003221	0
T(9)			0	0	0	0	0.001159	0.001215	0.000989	0	0	0	0.001085	0.000838	0.000836	0.002002	0.000715	0.002374	0	0.000365	0.00099	0.000222	0.00121	0.003221	0.351953
D(72)			0	0	0	0	0	0.001215	0	0	0.002762	0.001658	0	0.001675	0	0.001201	0.001429	0.002374	0.004479	0.014223	0.010399	0.001997	0.00242	0.000805	0
V(58)			0	0	0	0	0	0	0.001978	0	0	0	0	0.007538	0.001671	0.010408	0.001786	0	0.00112	0	0.001238	0.002441	0.004841	0	0.000494
S(68)			0.010417	0	0	0	0.001159	0.001215	0	0.001468	0	0	0.001085	0.00335	0.001393	0.003203	0.001072	0	0	0.000729	0.001981	0.001997	0.002017	0.000805	0
V(5)			0	0	0	0	0.001159	0.00243	0	0.048458	0.002762	0	0	0.001675	0.000279	0	0	0	0	0	0	0.000444	0	0	0.000494
V(62)			0	0	0	0	0	0	0	0	0	0	0	0.001675	0.000279	0.002002	0.000357	0.002374	0.00224	0.000365	0.00099	0.001109	0.004841	0	0.001483
L(73)			0	0	0.003195	0.001916	0	0.001215	0.001978	0.001468	0	0	0	0	0.000557	0.001201	0.001072	0.000593	0	0.000365	0.000248	0.001331	0.001614	0	0.000989
S(55)			0	0	0	0	0	0	0	0.001468	0	0	0.001085	0	0.000279	0.0004	0	0	0	0	0.000495	0	0.000807	0.004026	0.002472
S(16)			0	0	0	0	0	0	0	0	0	0	0	0.008375	0	0	0.000715	0	0	0	0	0	0	0	0.000494
F(20)			0	0	0	0	0	0	0	0	0	0	0	0	0	0.001201	0.000715	0	0.00056	0	0	0.000444	0.00121	0	0
V(49)			0	0	0	0	0	0	0	0	0	0	0	0	0.000836	0	0	0	0	0	0.000743	0.000222	0	0	0.001977
R(69)			0	0	0.00639	0	0.002317	0	0	0	0	0.003317	0	0	0.000557	0	0	0.000593	0	0	0	0	0.000403	0	0
C(43)			0	0	0	0	0	0	0	0	0	0	0	0.000838	0	0	0.000715	0.000593	0	0	0.000495	0.000222	0.000807	0	0
A(41)			0	0	0	0.001916	0	0	0	0	0	0	0	0	0	0	0	0	0.00056	0	0.000248	0.000444	0.000807	0.000805	0.000494
V(24)			0	0	0	0	0	0.001215	0	0	0	0	0	0.000838	0	0.001201	0	0	0	0	0.000495	0	0	0	0
G(10)			0	0	0	0	0	0	0	0.001468	0	0	0	0	0	0.000801	0	0	0.00056	0	0	0	0	0.000805	0
K(53)			0	0	0	0	0.003476	0	0	0	0	0	0	0	0	0.0004	0	0	0	0	0	0	0	0	0
F(26)			0	0	0	0	0	0	0	0	0	0.001658	0.001085	0	0	0.000801	0	0	0	0	0	0	0	0	0
L(74)			0	0	0	0.001916	0	0	0	0	0	0	0	0	0.000279	0	0	0	0	0	0	0.000444	0	0	0
I(33)			0	0	0	0	0	0	0	0	0	0	0	0	0	0	0.000357	0.001187	0	0	0	0.000222	0	0	0
N(66)			0	0	0	0	0	0.001215	0.000989	0	0	0	0	0	0	0.0004	0.000357	0	0	0	0	0	0	0	0
V(52)			0	0	0	0	0	0	0	0	0	0	0	0.000838	0	0	0	0	0	0	0	0.000444	0	0	0
T(30)			0	0	0	0	0	0	0	0	0	0	0	0	0.000279	0	0	0.000593	0	0.000365	0	0	0	0	0
L(18)			0	0	0	0	0	0	0	0	0	0	0	0	0	0.0004	0	0	0.00112	0	0	0	0	0	0
E(8)			0	0	0	0	0	0	0	0	0	0	0	0	0.000557	0	0	0	0	0	0	0	0.000403	0	0
L(19)			0	0	0	0	0	0	0	0	0	0	0	0.000838	0	0	0.000357	0	0	0.000365	0	0	0	0	0
C(40)			0	0	0	0	0	0	0	0	0	0	0	0	0	0	0	0	0	0	0	0.000222	0.000403	0	0
L(27)			0	0	0	0.001916	0	0	0	0	0	0	0	0	0	0	0	0	0	0	0	0.000222	0	0	0
A(22)			0	0	0	0	0	0	0	0	0	0	0	0.000838	0	0	0	0	0.00056	0	0	0	0	0	0
V(75)			0	0	0	0	0	0	0	0	0	0	0	0	0.000557	0	0	0	0	0	0	0	0	0	0
S(50)			0	0	0	0	0	0	0	0	0	0	0	0	0	0	0.000715	0	0	0	0	0	0	0	0
R(61)			0	0	0	0	0	0	0	0	0	0	0	0	0	0	0	0	0	0	0	0.000222	0	0	0.000494
L(65)			0	0	0	0	0	0	0	0	0	0	0	0	0	0	0	0	0	0	0	0.000222	0.000403	0	0
L(34)			0	0	0	0	0	0.001215	0	0	0	0	0	0	0	0	0	0	0	0	0	0	0	0	0
S(67)			0	0	0	0	0	0	0	0	0	0	0	0	0	0	0	0	0	0	0	0.000222	0	0	0
F(23)			0	0	0	0	0	0	0	0	0	0	0	0	0	0	0	0	0	0	0	0	0.000403	0	0
V(29)			0	0	0	0	0	0	0	0	0	0	0	0	0	0	0	0	0	0	0	0	0	0.000805	0
S(3)			0	0	0	0	0	0	0	0	0	0	0	0	0	0	0	0	0	0	0.000248	0	0	0	0
T(11)			0	0	0	0	0	0	0	0	0	0	0	0	0	0	0	0	0	0	0	0.000222	0	0	0
K(63)			0	0	0	0	0	0	0	0	0	0	0	0	0	0	0	0	0	0	0	0	0	0.000805	0
N(64)			0	0	0	0	0	0	0	0	0	0	0	0	0	0	0	0	0	0	0	0	0	0.000805	0
T(35)			0	0	0	0	0	0	0.000989	0	0	0	0	0	0	0	0	0	0	0	0	0	0	0	0
A(36)			0	0.076923	0	0	0	0	0	0	0	0	0	0	0	0	0	0	0	0	0	0	0	0	0
I(13)			0	0	0	0	0	0	0.000989	0	0	0	0	0	0	0	0	0	0	0	0	0	0	0	0
P(54)			0	0	0	0	0	0	0	0	0	0	0	0	0	0	0	0	0	0	0.000248	0	0	0	0
V(70)			0	0	0	0	0	0.001215	0	0	0	0	0	0	0	0	0	0	0	0	0	0	0	0	0
L(51)			0	0	0	0	0	0	0	0	0	0	0	0	0	0	0	0	0	0	0.000248	0	0	0	0
S(6)			0	0	0	0	0	0	0	0	0	0	0	0	0	0	0	0	0	0	0	0	0	0	0
N(15)			0	0	0	0	0	0	0	0	0	0	0	0	0	0	0	0	0	0	0	0	0	0	0
V(17)			0	0	0	0	0	0	0	0	0	0	0	0	0	0	0	0	0	0	0	0	0	0	0
Y(2)			0	0	0	0	0	0	0	0	0	0	0	0	0	0	0	0	0	0	0	0	0	0	0
V(14)			0	0	0	0	0	0	0	0	0	0	0	0	0	0	0	0	0	0	0	0	0	0	0
F(4)			0	0	0	0	0	0	0	0	0	0	0	0	0	0	0	0	0	0	0	0	0	0	0
L(12)			0	0	0	0	0	0	0	0	0	0	0	0	0	0	0	0	0	0	0	0	0	0	0
E(7)			0	0	0	0	0	0	0	0	0	0	0	0	0	0	0	0	0	0	0	0	0	0	0
R(38)			0	0	0	0	0	0	0	0	0	0	0	0	0	0	0	0	0	0	0	0	0	0	0
V(25)			0	0	0	0	0	0	0	0	0	0	0	0	0	0	0	0	0	0	0	0	0	0	0
I(46)			0	0	0	0	0	0	0	0	0	0	0	0	0	0	0	0	0	0	0	0	0	0	0
S(60)			0	0	0	0	0	0	0	0	0	0	0	0	0	0	0	0	0	0	0	0	0	0	0
Y(59)			0	0	0	0	0	0	0	0	0	0	0	0	0	0	0	0	0	0	0	0	0	0	0
Y(57)			0	0	0	0	0	0	0	0	0	0	0	0	0	0	0	0	0	0	0	0	0	0	0
F(56)			0	0	0	0	0	0	0	0	0	0	0	0	0	0	0	0	0	0	0	0	0	0	0
N(48)			0	0	0	0	0	0	0	0	0	0	0	0	0	0	0	0	0	0	0	0	0	0	0
V(47)			0	0	0	0	0	0	0	0	0	0	0	0	0	0	0	0	0	0	0	0	0	0	0
N(45)			0	0	0	0	0	0	0	0	0	0	0	0	0	0	0	0	0	0	0	0	0	0	0
L(28)			0	0	0	0	0	0	0	0	0	0	0	0	0	0	0	0	0	0	0	0	0	0	0
C(44)			0	0	0	0	0	0	0	0	0	0	0	0	0	0	0	0	0	0	0	0	0	0	0
Y(42)			0	0	0	0	0	0	0	0	0	0	0	0	0	0	0	0	0	0	0	0	0	0	0
L(39)			0	0	0	0	0	0	0	0	0	0	0	0	0	0	0	0	0	0	0	0	0	0	0
L(37)			0	0	0	0	0	0	0	0	0	0	0	0	0	0	0	0	0	0	0	0	0	0	0
A(32)			0	0	0	0	0	0	0	0	0	0	0	0	0	0	0	0	0	0	0	0	0	0	0
L(31)			0	0	0	0	0	0	0	0	0	0	0	0	0	0	0	0	0	0	0	0	0	0	0
M(1)			0	0	0	0	0	0	0	0	0	0	0	0	0	0	0	0	0	0	0	0	0	0	0

## Sheet: Asia
	2019-11-30	2019-12-31	2020-01-31	2020-02-29	2020-03-31	2020-04-30	2020-05-31	2020-06-30	2020-07-31	2020-08-31	2020-09-30	2020-10-31	2020-11-30	2020-12-31	2021-01-31	2021-02-28	2021-03-31	2021-04-30	2021-05-31	2021-06-30	2021-07-31	2021-08-31	2021-09-30	2021-10-31	2021-11-30
P(71)			0.001133	0.003273	0.001133	0.001195	0.001026	0.001062	0.001676	0.001118	0.000368	0.000648	0.002106	0.002465	0.00907	0.03943	0.084318	0.037786	0.024586	0.034082	0.016054	0.002087	0.001254	0.001276	0.001376
V(62)			0	0	0.001133	0	0	0.000708	0	0	0	0.007448	0.003686	0.002553	0.002162	0.001592	0.002723	0.003293	0.003375	0.006352	0.007288	0.002879	0.022877	0.090198	0.053858
T(9)			0	0	0	0	0	0	0.001916	0	0.000368	0.000324	0.000176	0.000528	0.001102	0.000434	0.000738	0.000494	0.000165	0.000472	0.000338	0.000348	0.000434	0.000333	0.075126
L(21)			0.001133	0	0	0.000597	0	0.001062	0.000958	0	0.002206	0.002915	0.011058	0.013822	0.004874	0.005716	0.010522	0.001729	0.001454	0.001742	0.001098	0.000477	0.000289	0.000277	0.000438
L(73)			0.001133	0	0.001133	0.000597	0.001026	0	0.000479	0.000559	0.001471	0.000648	0.006319	0.002729	0.001738	0.002243	0.002354	0.002744	0.00107	0.000363	0.000359	0.000364	0.000723	0.002052	0.000719
S(68)			0.00453	0.00491	0.007556	0.002788	0.008205	0.006728	0.004071	0.004098	0.005882	0.002267	0.00158	0.001144	0.001695	0.001375	0.001292	0.000604	0.000686	0.001379	0.000507	0.000388	0.000747	0.000888	0.001314
S(55)			0.001133	0	0.000378	0.000199	0.000684	0.000354	0	0.000373	0	0	0.000351	0.002113	0.003094	0.000362	0.000738	0.000357	0.000659	0.000762	0.000465	0.000307	0.00041	0.00061	0.001376
V(24)			0	0	0	0	0	0	0.000239	0	0.000368	0	0.000702	0.000528	0.000297	0.000217	0.003415	0.002305	0.001043	0.000436	0.000106	0.000186	0.000458	0.000388	0.000532
V(58)			0	0	0	0	0	0.000354	0.000239	0.000373	0.000368	0	0.000527	0	0.000339	0.000434	0.000369	0.000713	0.001043	0.000799	0.000697	0.000574	0.000627	0.001054	0.001001
A(41)			0	0	0	0.000199	0	0.000354	0	0	0	0	0	0.000616	0.001738	0.003183	0.002261	0.000851	0.000439	0.000871	0.000169	0.000113	0.000121	0.000166	0.000375
V(49)			0.001133	0	0	0	0	0.000354	0	0.000559	0.000368	0	0	0.000968	0.001144	0.00217	0.000738	0.000274	0.000192	0.000436	0.000232	0.000226	0.000579	0.001276	0.000594
D(72)			0.001133	0.001637	0	0.000199	0	0.000708	0.000479	0	0.000368	0.000648	0.000351	0.000264	0.000805	0.000579	0.000369	0.000137	0.00022	0.000218	0.000486	0.000332	0.000627	0.000999	0.00097
R(61)			0	0	0.001133	0	0.000342	0	0.000239	0	0	0.000324	0	8.8e-05	0.000424	0.000217	0.000462	0.000357	0.000604	0.000617	0.000127	8.1e-05	0.000217	0.000111	0.000219
F(26)			0	0	0	0.000398	0.001709	0	0	0	0	0.001619	0.000176	8.8e-05	0.000127	0.000434	0.000231	0.000357	0.000137	0.000218	8.4e-05	3.2e-05	0.000121	0.000721	0.000532
R(69)			0	0	0.000378	0	0	0	0	0.000186	0	0.000648	0.000176	0.000528	0.000848	0.000651	0.000231	0.00011	8.2e-05	0	0.000169	4.9e-05	0.000169	0.000111	0.000438
E(8)			0	0	0	0	0	0.000354	0	0	0	0.000324	0.000176	0.000264	0.001314	0.000434	9.2e-05	0.00011	2.7e-05	3.6e-05	0.000106	4e-05	2.4e-05	5.5e-05	0.000719
T(30)			0	0.003273	0	0	0	0.002833	0	0.000186	0	0.000324	0	8.8e-05	0.000254	0.000506	0.000554	0.000137	0.000247	0.000399	0.000106	3.2e-05	9.6e-05	5.5e-05	0.000219
S(16)			0	0	0	0.000199	0	0	0.000239	0	0	0	0	0	0	0	9.2e-05	0	0	0.000109	0.000359	9.7e-05	2.4e-05	0.001165	0.000751
V(70)			0	0	0	0	0	0.000354	0	0	0	0	0.000527	8.8e-05	0.000254	7.2e-05	0	0.00011	5.5e-05	0.000181	0.000106	9.7e-05	0.000337	0.000444	0.000469
L(19)			0	0	0	0	0	0	0	0.000186	0	0	0	0	0	7.2e-05	0	0.00011	0	7.3e-05	2.1e-05	4.9e-05	4.8e-05	0.001942	0.000751
S(50)			0	0	0	0	0	0	0	0.000186	0	0.000324	0	0	8.5e-05	0.000145	0.000185	5.5e-05	5.5e-05	0.000109	0.000169	0.000235	0.000121	0.000277	0.00025
V(5)			0	0	0.000378	0	0	0.000708	0	0.000373	0	0.000324	0.000351	0.000264	8.5e-05	7.2e-05	4.6e-05	0.000165	0.00011	0.000145	6.3e-05	8.1e-05	0.000169	0.000333	0.000344
N(66)			0	0	0	0.000199	0.000342	0	0	0	0	0.000324	0	8.8e-05	0.000127	0.000145	0.000277	5.5e-05	0.000302	0.000109	0.000253	8.1e-05	0.000145	5.5e-05	3.1e-05
C(43)			0	0	0	0	0	0	0.000239	0	0.000368	0	0	0.000176	0.000212	7.2e-05	0.000185	5.5e-05	2.7e-05	0	0.000211	8.9e-05	9.6e-05	0.000333	0.000313
V(75)			0	0.001637	0	0.000199	0.000342	0	0.000239	0	0	0.000324	0.000702	0	0.000551	0	0.000692	2.7e-05	2.7e-05	3.6e-05	2.1e-05	2.4e-05	7.2e-05	5.5e-05	0.000188
V(47)			0	0	0	0.000597	0	0	0	0	0	0.000972	0.001755	0.000616	4.2e-05	0	0.000138	2.7e-05	0	7.3e-05	2.1e-05	4.9e-05	0	0.000444	0.000156
L(74)			0	0	0	0	0	0	0	0	0.000368	0	0	0	0.000339	7.2e-05	0.000185	8.2e-05	0.000137	3.6e-05	0	7.3e-05	0.000193	0	0.000156
S(6)			0	0	0	0	0.000684	0.000708	0	0	0	0	0.000176	0	0.000212	0	4.6e-05	8.2e-05	0	3.6e-05	0	3.2e-05	0.000241	0.00061	0
I(46)			0	0.001637	0	0	0.001368	0	0	0	0	0.000972	0.001755	0.000528	8.5e-05	7.2e-05	9.2e-05	0	0	3.6e-05	6.3e-05	3.2e-05	0	5.5e-05	0
G(10)			0	0	0	0	0	0	0	0	0	0	0	0	0.000127	0.000217	0	5.5e-05	2.7e-05	3.6e-05	0.000148	8.9e-05	2.4e-05	0	0.000156
L(37)			0	0	0	0	0	0	0.000239	0	0	0.000324	0	0.000176	4.2e-05	0	0.000185	8.2e-05	5.5e-05	7.3e-05	8.4e-05	4.9e-05	7.2e-05	0.000111	0
L(51)			0	0	0	0	0	0	0.000239	0	0	0	0	8.8e-05	8.5e-05	7.2e-05	4.6e-05	0	5.5e-05	0.000145	8.4e-05	4e-05	0.000145	0	0.000125
F(20)			0	0	0	0	0	0.000354	0	0	0	0	0	0	4.2e-05	7.2e-05	0	2.7e-05	5.5e-05	3.6e-05	8.4e-05	6.5e-05	0.000193	0	0.000125
L(27)			0	0	0	0	0	0	0	0	0	0.001619	0	0	0	0.000217	0.000138	5.5e-05	8.2e-05	3.6e-05	4.2e-05	1.6e-05	2.4e-05	0.000444	0
V(52)			0	0	0	0	0.000684	0	0	0	0	0	0	0	8.5e-05	0.000289	0.000231	2.7e-05	8.2e-05	0.000145	2.1e-05	2.4e-05	2.4e-05	5.5e-05	3.1e-05
E(7)			0	0	0	0.000199	0	0	0	0	0	0	0	0	0	7.2e-05	9.2e-05	0	2.7e-05	3.6e-05	4.2e-05	7.3e-05	0.000217	0	3.1e-05
I(33)			0	0	0	0	0.000342	0	0	0.000373	0.000735	0	0	8.8e-05	8.5e-05	7.2e-05	0.000138	0	5.5e-05	3.6e-05	8.4e-05	2.4e-05	7.2e-05	5.5e-05	0
L(34)			0	0	0	0	0	0	0	0	0	0	0	0	0	0	9.2e-05	0	5.5e-05	3.6e-05	2.1e-05	1.6e-05	9.6e-05	0.000444	0.000188
I(13)			0	0	0	0	0	0	0	0	0	0	0	0	0	0	0	2.7e-05	0	7.3e-05	8.4e-05	7.3e-05	0.000241	0	0
N(64)			0	0	0	0.000199	0	0	0	0	0	0	0.000351	0.000176	4.2e-05	0	0	2.7e-05	2.7e-05	0.000109	8.4e-05	1.6e-05	4.8e-05	0	0.000125
S(67)			0	0	0	0	0	0	0	0	0.000735	0	0.000176	8.8e-05	0.000127	7.2e-05	0	0	8.2e-05	3.6e-05	6.3e-05	1.6e-05	4.8e-05	5.5e-05	9.4e-05
A(22)			0	0	0	0	0	0	0	0	0	0	0	8.8e-05	0	7.2e-05	4.6e-05	2.7e-05	0	0.000145	8.4e-05	3.2e-05	7.2e-05	0	9.4e-05
A(36)			0	0	0	0	0	0	0	0	0.000368	0	0	0	0	7.2e-05	0.000138	0	8.2e-05	3.6e-05	4.2e-05	3.2e-05	0	0	9.4e-05
C(44)			0	0	0	0	0	0	0	0	0.000368	0	0	0	4.2e-05	0	4.6e-05	0	0	3.6e-05	0.000106	2.4e-05	7.2e-05	0.000111	3.1e-05
F(23)			0	0	0	0.000398	0	0	0	0	0	0	0	8.8e-05	0	0	4.6e-05	5.5e-05	2.7e-05	3.6e-05	2.1e-05	3.2e-05	7.2e-05	5.5e-05	3.1e-05
V(14)			0.001133	0	0	0	0	0	0	0	0	0	0	0.000176	4.2e-05	0	9.2e-05	2.7e-05	2.7e-05	0.000109	2.1e-05	2.4e-05	2.4e-05	0	6.3e-05
S(60)			0	0	0	0	0	0	0	0	0	0	0	0	4.2e-05	0.000145	0.000185	0	2.7e-05	3.6e-05	2.1e-05	2.4e-05	0	0	0.000125
T(11)			0	0	0	0	0	0	0	0	0	0	0	0	0	0	0	0	5.5e-05	7.3e-05	0	6.5e-05	9.6e-05	0	0
F(4)			0	0	0	0.000199	0	0	0	0	0	0	0	0	4.2e-05	0	0	2.7e-05	0	3.6e-05	0	3.2e-05	0.000169	0	0
V(29)			0	0	0	0	0	0	0	0	0	0	0	0	0	0	4.6e-05	0	0	3.6e-05	2.1e-05	1.6e-05	4.8e-05	0.000388	3.1e-05
L(28)			0	0	0	0	0	0	0	0	0	0	0	0	0	0	0	0	0	3.6e-05	2.1e-05	1.6e-05	4.8e-05	0.000499	0
Y(42)			0	0	0	0	0	0	0	0	0	0	0	0	4.2e-05	0	0.000231	0	2.7e-05	3.6e-05	4.2e-05	3.2e-05	0	0	0
S(3)			0	0	0	0	0	0	0.000239	0	0	0	0	0	4.2e-05	0	4.6e-05	0.000137	0	3.6e-05	0	0	4.8e-05	5.5e-05	6.3e-05
C(40)			0	0	0	0	0	0	0	0	0	0	0	0	0	0	9.2e-05	0	2.7e-05	7.3e-05	4.2e-05	2.4e-05	4.8e-05	0	0
P(54)			0.001133	0	0	0.000199	0	0	0	0	0	0	0	0	0	0	9.2e-05	2.7e-05	0	3.6e-05	2.1e-05	1.6e-05	0	5.5e-05	3.1e-05
R(38)			0	0	0	0	0	0	0	0	0	0	0	0	0	0	0.000138	0	5.5e-05	7.3e-05	2.1e-05	1.6e-05	0	0	0
A(32)			0	0	0	0	0	0	0	0	0	0	0	0	0	0	0	0	2.7e-05	0.000218	2.1e-05	1.6e-05	0	0	0
K(53)			0	0	0	0	0	0	0.000239	0	0	0.000324	0	0	4.2e-05	0	4.6e-05	0	0	3.6e-05	2.1e-05	1.6e-05	0	0	6.3e-05
F(56)			0	0	0	0	0	0	0	0	0	0	0.000176	0	0	0	4.6e-05	0	0	3.6e-05	2.1e-05	1.6e-05	0	0.000111	3.1e-05
T(35)			0	0	0	0	0	0	0	0	0	0	0	0	0	0	9.2e-05	0	2.7e-05	3.6e-05	4.2e-05	2.4e-05	0	0	0
V(25)			0	0	0	0	0	0	0	0	0	0	0	8.8e-05	4.2e-05	0	0	0	2.7e-05	7.3e-05	2.1e-05	1.6e-05	0	0	0
K(63)			0	0	0	0.000199	0	0	0	0	0	0	0	0	0	7.2e-05	0	0	2.7e-05	3.6e-05	2.1e-05	2.4e-05	0	0	0
L(18)			0	0	0	0	0	0	0	0	0	0	0	0	4.2e-05	0	4.6e-05	0	0	0	4.2e-05	8e-06	0	0	6.3e-05
Y(57)			0	0	0	0	0	0	0	0	0	0	0	0	0	0	9.2e-05	2.7e-05	0	3.6e-05	2.1e-05	1.6e-05	0	0	0
N(48)			0	0	0	0	0	0	0	0	0	0	0	0	4.2e-05	0	4.6e-05	0	0	3.6e-05	2.1e-05	1.6e-05	0	0	3.1e-05
N(45)			0	0	0	0	0	0	0	0	0	0	0	0	0	0	4.6e-05	0	2.7e-05	7.3e-05	2.1e-05	1.6e-05	0	0	0
L(39)			0	0	0	0	0	0	0	0	0	0	0	0	0	0	0.000138	0	2.7e-05	3.6e-05	0	1.6e-05	0	0	0
L(31)			0	0	0	0	0	0	0	0	0	0	0	0	0	7.2e-05	9.2e-05	0	0	3.6e-05	2.1e-05	1.6e-05	0	0	0
L(12)			0	0	0	0	0	0	0	0	0	0	0	0	0	0	0	0	0	3.6e-05	2.1e-05	1.6e-05	2.4e-05	5.5e-05	0
Y(59)			0	0	0	0	0	0	0	0	0	0	0	0	0	0	9.2e-05	0	2.7e-05	3.6e-05	0	1.6e-05	0	0	0
L(65)			0	0	0	0.000199	0	0	0	0	0	0	0	0	0	0	0	0	2.7e-05	3.6e-05	2.1e-05	1.6e-05	0	0	0
N(15)			0	0	0	0	0	0	0	0	0	0	0	0	0	0	0	0	0	3.6e-05	2.1e-05	1.6e-05	0	0	3.1e-05
V(17)			0	0	0	0	0	0	0	0	0	0	0	0	0	0	0	2.7e-05	0	3.6e-05	2.1e-05	1.6e-05	0	0	0
M(1)			0	0	0	0	0	0	0	0	0	0	0	0	0	0	0	0	0	0	0	8e-06	0	0	0
Y(2)			0	0	0	0	0	0	0	0	0	0	0	0	0	0	0	0	0	0	0	0	0	0	0

## Sheet: Europe
	2019-11-30	2019-12-31	2020-01-31	2020-02-29	2020-03-31	2020-04-30	2020-05-31	2020-06-30	2020-07-31	2020-08-31	2020-09-30	2020-10-31	2020-11-30	2020-12-31	2021-01-31	2021-02-28	2021-03-31	2021-04-30	2021-05-31	2021-06-30	2021-07-31	2021-08-31	2021-09-30	2021-10-31	2021-11-30
T(9)			0.000986	0	0.000141	0.001007	0.003305	0.002475	0.005262	0.001762	0.000499	0.000204	0.000577	0.002963	0.004412	0.001996	0.002012	0.001647	0.000985	0.000212	0.000226	0.000297	0.000534	0.000565	0.086839
P(71)			0.001233	0	0.000458	0.000926	0.002796	0.000396	0.001879	0.000766	0.000791	0.00075	0.001172	0.001803	0.006938	0.016775	0.024404	0.019717	0.011186	0.006073	0.005289	0.001218	0.001769	0.00159	0.001607
V(58)			0.000247	0	0.000317	0.000403	0.000254	9.9e-05	0.000188	0.000919	0.000208	0.000386	0.000252	0.000349	0.001269	0.001471	0.001918	0.002221	0.002401	0.001224	0.006619	0.004097	0.002449	0.001721	0.000908
V(62)			0.000247	0	0.000141	0.000121	0.000127	0.000198	0.000188	0.001915	0.00129	0.001181	0.001262	0.001006	0.000569	0.000369	0.001656	0.001447	0.001599	0.000867	0.001001	0.001348	0.002538	0.002753	0.002659
L(21)			0.002466	0	0.000458	0.000886	0.000381	0	0.000188	7.7e-05	0.000458	0.000454	0.000866	0.000657	0.001401	0.002249	0.004145	0.005348	0.003463	0.001396	0.000308	0.000173	0.000427	0.000581	0.000652
L(73)			0.002713	0	0.000845	0.002255	0.002161	0.000396	0.00094	0.000153	0.000624	0.001544	0.001695	0.001034	0.002017	0.002301	0.001226	0.001468	0.003174	0.001846	0.000763	0.001006	0.000933	0.00082	0.001042
S(55)			0.000247	0	0.000211	0.000121	0.003305	0.000198	0	0.000383	0.00025	0.000977	0.001028	0.000531	0.000491	0.000428	0.000267	0.000374	0.00033	0.000377	0.001305	0.001825	0.001545	0.001687	0.001736
S(68)			0.001973	0	0.001478	0.002819	0.008261	0.002475	0.009397	0.002758	0.002455	0.000795	0.00128	0.001524	0.00085	0.001335	0.001226	0.001653	0.001156	0.000681	0.000345	0.000408	0.000751	0.000753	0.000838
V(24)			0.000247	0	0.000704	0.000403	0.000763	0	0.000188	0.000153	0.000208	0.000136	0.000307	0.000168	0.000383	0.000519	0.001152	0.000639	0.000472	0.000404	0.000271	0.0005	0.000495	0.000434	0.000531
A(41)			0	0	0	0.000322	0.000127	9.9e-05	0.000752	0	0.000166	6.8e-05	0.000108	9.8e-05	0.000156	0.000201	0.000159	0.00026	0.000277	0.000225	0.000455	0.000372	0.000673	0.000833	0.001014
R(69)			0.000247	0	0.000211	0.000443	0.002796	0.000396	0.000564	0.000306	0.000208	0.000227	0.000162	9.8e-05	0.000323	5.8e-05	0.001084	0.001176	0.000602	0.000152	8.2e-05	0.000242	0.000338	0.000363	0.000274
V(49)			0.000493	0	3.5e-05	0.000121	0.000635	0	0.000376	0.00069	0.000333	0.000114	0.000541	0.000112	0.000341	0.000337	0.0004	0.000412	0.000448	0.00043	0.000246	0.000447	0.000474	0.00041	0.000159
T(30)			0.001233	0	0.000106	0.000846	0.002034	0.00099	0.002443	0.001226	0	2.3e-05	0.000289	0.000308	0.000461	0.000279	0.00074	0.000926	0.000525	0.000265	7e-05	7.5e-05	6.8e-05	5.4e-05	5.6e-05
D(72)			0.000493	0	0.000458	0.000966	0.000254	0	0	7.7e-05	0.000291	0.000136	0.000451	0.000154	0.000233	0.000143	8.2e-05	0.000168	0.000354	0.000238	0.000291	0.000336	0.000317	0.000235	0.000258
F(20)			0.000247	0	0	0	0	0	0	0	8.3e-05	0.00184	0.000469	0.000224	0.000132	0.000194	0.000142	7.6e-05	4.7e-05	2.6e-05	0	0.000245	0.000157	0.000568	0.000235
V(5)			0	0	3.5e-05	0.000201	0.000508	0.000297	0.000188	0.00023	4.2e-05	0.000136	0.000307	0.000182	0.000347	0.00013	0.000176	0.000168	0.000171	0.000238	0.000115	0.000189	0.000249	0.00043	0.000148
V(70)			0.000247	0	0	4e-05	0.000127	0	0	7.7e-05	0.000166	9.1e-05	0.000198	0.000126	0.000108	7.1e-05	0.000108	0.000108	0.000112	0.000152	5.3e-05	0.000108	0.000178	0.000289	0.000467
E(8)			0.000247	0	3.5e-05	4e-05	0.000254	0	0.000188	0.000843	0.000791	0.000295	0.000289	0.000182	0.000156	0.000233	0.000125	0.00013	5.3e-05	0.000106	0.000119	0.00014	0.000267	0.000333	0.000159
K(53)			0	0	0	0	0	0.001485	0.000564	0	0	0	0	2.8e-05	2.4e-05	1.3e-05	6.9e-05	1.1e-05	0	7e-06	0	4.6e-05	4.6e-05	0.000548	0.000433
N(66)			0	0	0	0	0.000127	0	0	7.7e-05	0	0	0.000126	4.2e-05	3.6e-05	1.9e-05	3e-05	4.3e-05	5.9e-05	2.6e-05	1.2e-05	7.2e-05	0.000363	0.000434	0.000252
C(43)			0.000247	0	3.5e-05	0.000201	0.000381	0	0	7.7e-05	0.000166	0.000204	0.000361	1.4e-05	5.4e-05	5.8e-05	4.3e-05	9.8e-05	5.9e-05	0.000304	0.000238	0.00034	0.000196	9.1e-05	9.5e-05
L(19)			0	0	3.5e-05	0	0	0	0	0.00023	0	6.8e-05	3.6e-05	8.4e-05	8.4e-05	0.000123	0.000138	0.000179	0.000147	0.000198	1.6e-05	4.6e-05	4.6e-05	7.7e-05	0.000246
S(16)			0	0	3.5e-05	0.000201	0	0	0	0	4.2e-05	6.8e-05	0	4.2e-05	0.000138	8.4e-05	9e-05	6e-05	8.8e-05	7.9e-05	3.3e-05	0.000144	0.000103	0.000118	0.000216
R(61)			0.000247	0	7e-05	4e-05	0.000127	0	0	0	4.2e-05	0.000182	0.000505	8.4e-05	2.4e-05	3.2e-05	2.6e-05	1.6e-05	5.3e-05	0.000112	0.000115	0.000134	0.000206	0.000128	0.000142
S(67)			0.000493	0	0	0	0	0	0	0	0	0.000341	0.00027	0.00014	4.2e-05	2.6e-05	4e-06	2.7e-05	2.4e-05	0.000198	0.000382	8.2e-05	7.5e-05	0.000138	4.5e-05
L(51)			0	0	0	0	0	0	0	0	4.2e-05	0	0	8.4e-05	0.00015	0.000188	0.000284	0.000222	0.000212	6.6e-05	4.9e-05	2.9e-05	8.2e-05	1.7e-05	5.8e-05
I(13)			0.000247	0	7e-05	0	0	0	0.001879	7.7e-05	0	2.3e-05	1.8e-05	1.4e-05	0.00012	7.1e-05	5.6e-05	0.000423	0.000242	0.000146	4.9e-05	4.2e-05	5.7e-05	2.7e-05	2.5e-05
N(64)			0	0	3.5e-05	4e-05	0	0	0	0	4.2e-05	0.000227	0	1.4e-05	6.6e-05	0.000207	0.000198	0.0002	7.7e-05	3.3e-05	2.9e-05	3.6e-05	0.000107	3.7e-05	2.5e-05
F(26)			0	0	0	4e-05	0	0	0	7.7e-05	0.000125	2.3e-05	1.8e-05	5.6e-05	0.000114	2.6e-05	6e-05	6.5e-05	5.9e-05	4.6e-05	2.9e-05	6.5e-05	6.1e-05	5.7e-05	0.000101
G(10)			0	0	3.5e-05	0.000121	0	0	0.000188	0	0	4.5e-05	1.8e-05	1.4e-05	1.8e-05	3.9e-05	6e-05	3.3e-05	3.5e-05	9.9e-05	9.8e-05	0.000137	3.6e-05	5.7e-05	7.5e-05
S(3)			0	0	0	0	0	0	0	0	8.3e-05	0	1.8e-05	1.4e-05	9e-05	0.000104	8.6e-05	3.3e-05	4.7e-05	1.3e-05	1.2e-05	3.6e-05	4.6e-05	4e-05	0.000128
V(75)			0	0	0	0.000443	0.001652	0.000198	0	0	0	0	9e-05	5.6e-05	2.4e-05	4.5e-05	1.3e-05	9.2e-05	5.3e-05	7.3e-05	0.000148	5.2e-05	4.3e-05	3e-05	4.2e-05
V(52)			0	0	3.5e-05	4e-05	0	0	0.000188	7.7e-05	4.2e-05	2.3e-05	9e-05	5.6e-05	0.000227	0.000156	8.2e-05	8.1e-05	4.1e-05	0	2.1e-05	4.6e-05	7.5e-05	1.7e-05	2.6e-05
A(22)			0	0	7e-05	0	0	0	0	7.7e-05	8.3e-05	2.3e-05	7.2e-05	2.8e-05	3.6e-05	6e-06	1.3e-05	7.6e-05	2.9e-05	6.6e-05	5.3e-05	6.2e-05	8.5e-05	0.000101	6.5e-05
S(50)			0	0	0.000106	0	0.000127	0	0	0	4.2e-05	0	1.8e-05	1.4e-05	2.4e-05	1.3e-05	2.6e-05	5e-06	1.8e-05	9.3e-05	3.7e-05	0.00014	0.000132	4.7e-05	4.5e-05
V(14)			0	0	0	0	0	0	0	0	0	0	1.8e-05	1.4e-05	2.4e-05	6e-06	4.3e-05	0.000135	5.9e-05	3.3e-05	4.1e-05	4.6e-05	0.000174	2.7e-05	3.9e-05
L(37)			0.000247	0	7e-05	0	0	0.000198	0.000376	7.7e-05	4.2e-05	9.1e-05	0.00018	0.000238	6e-05	9.7e-05	6e-05	2.7e-05	1.2e-05	4e-05	1.2e-05	4.9e-05	4.6e-05	4.4e-05	3.9e-05
C(44)			0	0	0	8.1e-05	0	9.9e-05	0	0	4.2e-05	2.3e-05	5.4e-05	8.4e-05	1.2e-05	1.9e-05	2.6e-05	0	6e-06	7e-06	2.9e-05	2.6e-05	5e-05	7.7e-05	0.000126
L(74)			0	0	3.5e-05	0	0	0	0	7.7e-05	0	2.3e-05	1.8e-05	7e-05	2.4e-05	1.3e-05	3.9e-05	0.000141	0.000124	2e-05	2.5e-05	2e-05	2.8e-05	7.1e-05	6.5e-05
I(46)			0.000493	0	0	0	0	0	0	7.7e-05	0.000166	0.000727	0.000487	2.8e-05	4.2e-05	8.4e-05	7.3e-05	4.3e-05	2.4e-05	0	0	3e-06	3.2e-05	3e-06	2.6e-05
F(23)			0	0	0	0	0.000127	0	0	0	0	4.5e-05	3.6e-05	9.8e-05	0.000263	5.2e-05	3.4e-05	5e-06	1.8e-05	0	8e-06	2.6e-05	2.8e-05	0.000108	1.9e-05
I(33)			0	0	0	0	0	0	0	7.7e-05	0	0	5.4e-05	4.2e-05	7.8e-05	1.9e-05	2.2e-05	7.6e-05	3.5e-05	1.3e-05	0	3.3e-05	4e-06	9.7e-05	5.3e-05
A(36)			0	0	3.5e-05	0.000121	0	0	0	0	0	4.5e-05	7.2e-05	5.6e-05	3.6e-05	6e-06	3.4e-05	6e-05	3.5e-05	6.6e-05	1.6e-05	1.3e-05	4.3e-05	2.4e-05	4.7e-05
E(7)			0	0	3.5e-05	8.1e-05	0.000127	0	0	0	4.2e-05	0	5.4e-05	0	3.6e-05	7.8e-05	3e-05	5e-06	2.4e-05	7e-06	1.6e-05	7e-06	5.3e-05	3e-05	5e-05
T(11)			0	0	3.5e-05	4e-05	0	0	0	0	0	2.3e-05	7.2e-05	1.4e-05	1.2e-05	3.9e-05	4.3e-05	5.4e-05	2.9e-05	3.3e-05	1.6e-05	1.6e-05	3.6e-05	2.4e-05	4.5e-05
L(18)			0.000493	0	7e-05	4e-05	0	0	0	0	0	2.3e-05	0	0.00028	1.8e-05	3.9e-05	4e-06	3.8e-05	4.1e-05	1.3e-05	8e-06	1e-05	2.5e-05	3.4e-05	3.7e-05
L(27)			0	0	3.5e-05	4e-05	0.000127	9.9e-05	0	7.7e-05	4.2e-05	0	1.8e-05	4.2e-05	1.2e-05	0.00011	3.4e-05	5.4e-05	2.4e-05	2.6e-05	1.6e-05	7e-06	1.1e-05	1e-05	2.5e-05
F(4)			0	0	3.5e-05	0	0.000127	0	0	0	0	2.3e-05	5.4e-05	5.6e-05	2.4e-05	2.6e-05	1.7e-05	0	8.8e-05	2.6e-05	2.5e-05	3e-06	7e-06	7e-06	3.4e-05
V(47)			0	0	0	8.1e-05	0.000127	0	0	0	0	0	0	0	3e-05	1.3e-05	2.2e-05	3.3e-05	2.9e-05	7e-06	4.9e-05	3.6e-05	1.4e-05	1e-05	1.4e-05
F(56)			0	0	3.5e-05	0.000201	0.000127	0	0	0	0	0	3.6e-05	4.2e-05	1.2e-05	0	4.7e-05	0	2.4e-05	2e-05	1.6e-05	2.3e-05	1.4e-05	7e-06	2.2e-05
S(60)			0	0	0	0	0	9.9e-05	0	0.000536	0	6.8e-05	0	4.2e-05	0	3.9e-05	2.2e-05	2.7e-05	4.1e-05	0	8e-06	1.3e-05	7e-06	1.7e-05	1.2e-05
S(6)			0	0	0	0	0.000127	0	0	0	0	0	0	2.8e-05	1.8e-05	1.3e-05	7.3e-05	3.3e-05	6e-06	1.3e-05	1.2e-05	1e-05	4e-06	2.4e-05	6e-06
V(25)			0	0	0.000141	4e-05	0	0.001386	0	0	0	0	0	1.4e-05	6e-06	0	1.3e-05	5e-06	1.2e-05	0	0	1.3e-05	1.8e-05	3.4e-05	5e-06
Y(57)			0	0	0	0	0	0	0	0	0	0	0	0	0	1.3e-05	0	0	0	0	0	0	0	0	7e-05
A(32)			0	0	0	0	0.000254	9.9e-05	0.000188	7.7e-05	0	0	0	4.2e-05	1.8e-05	9.7e-05	3.9e-05	1.6e-05	2.4e-05	7e-06	8e-06	3e-06	0	0	2e-06
N(45)			0	0	0	8.1e-05	0	9.9e-05	0	0.000153	4.2e-05	0	0	0	1.2e-05	0	0	1.1e-05	6e-06	0	2.9e-05	2.6e-05	5.3e-05	7e-06	5e-06
C(40)			0	0	0	4e-05	0	0	0	7.7e-05	0	0	1.8e-05	0	6e-06	0	9e-06	0	1.8e-05	7e-06	4.5e-05	3.6e-05	7e-06	2.7e-05	2e-06
Y(42)			0	0	0	4e-05	0	9.9e-05	0	0	0	0	3.6e-05	1.4e-05	6e-06	0	4e-06	5e-06	1.2e-05	2.6e-05	1.6e-05	7e-06	4e-06	1.3e-05	1.2e-05
V(29)			0	0	0	0	0	0	0	0	0	0	0	1.4e-05	1.2e-05	6e-06	0	0	4.1e-05	2e-05	0	3e-06	0	1.3e-05	1.1e-05
P(54)			0.000247	0	0	0	0	9.9e-05	0	0	0	2.3e-05	1.8e-05	2.8e-05	1.2e-05	0	4e-06	1.6e-05	6e-06	0	4e-06	7e-06	4e-06	1e-05	8e-06
V(17)			0	0	3.5e-05	4e-05	0	0	0.000188	0	0	0	0	5.6e-05	1.2e-05	6e-06	9e-06	5e-06	6e-06	7e-06	1.2e-05	7e-06	4e-06	0	6e-06
N(48)			0	0	0	0	0.000254	0	0	0	8.3e-05	0	1.8e-05	0	6e-06	1.3e-05	4e-06	5e-06	1.2e-05	0	8e-06	1.6e-05	0	7e-06	5e-06
Y(2)			0	0	0	4e-05	0.000381	0	0	0	0	0	0	0	6e-06	0	9e-06	2.2e-05	1.8e-05	0	0	0	4e-06	3e-06	9e-06
L(28)			0	0	0	0	0.000127	0	0	0	0	0	0	0	6e-06	0	4e-06	0	0	0	4e-06	0	4e-06	1.7e-05	1.1e-05
L(65)			0	0	3.5e-05	0	0	0	0	0	0	0	0	0	6e-06	1.9e-05	0	5e-06	1.8e-05	1.3e-05	0	3e-06	7e-06	0	5e-06
L(31)			0.000247	0	0	8.1e-05	0.000127	0	0	0	0	2.3e-05	0	1.4e-05	0	0	4e-06	0	1.8e-05	7e-06	0	7e-06	0	3e-06	2e-06
K(63)			0	0	3.5e-05	0	0	0	0	0	0	0	0	0	6e-06	0	0	1.6e-05	0	0	2.5e-05	3e-06	0	0	3e-06
L(34)			0	0	0	0	0	0	0	0	0	2.3e-05	0	0	0	0	1.3e-05	5e-06	6e-06	1.3e-05	0	3e-06	0	0	2e-06
Y(59)			0	0	3.5e-05	0	0.000254	0	0	0	0	0	0	1.4e-05	0	0	0	0	0	7e-06	0	0	7e-06	0	2e-06
T(35)			0	0	0	0	0	0	0	0	0	0	0	0	0	6e-06	1.7e-05	0	0	0	4e-06	0	4e-06	3e-06	0
L(39)			0	0	3.5e-05	4e-05	0	0	0	0.000153	0	0	0	0	6e-06	0	0	0	0	0	0	0	0	3e-06	3e-06
L(12)			0	0	0	4e-05	0	0	0	0	0	0	0	0	6e-06	0	0	0	0	7e-06	0	0	4e-06	0	3e-06
N(15)			0	0	0	0	0	0	0	0	0	2.3e-05	0	0	0	6e-06	0	0	1.2e-05	7e-06	4e-06	0	0	0	0
R(38)			0	0	0	0	0	0	0	0	0	0	0	0	6e-06	1.3e-05	0	0	0	0	0	0	0	0	2e-06
M(1)			0	0	0	0	0	0	0	0	0	0	0	0	0	0	0	0	6e-06	0	0	0	0	0	0

## Sheet: North America
	2019-11-30	2019-12-31	2020-01-31	2020-02-29	2020-03-31	2020-04-30	2020-05-31	2020-06-30	2020-07-31	2020-08-31	2020-09-30	2020-10-31	2020-11-30	2020-12-31	2021-01-31	2021-02-28	2021-03-31	2021-04-30	2021-05-31	2021-06-30	2021-07-31	2021-08-31	2021-09-30	2021-10-31	2021-11-30
T(9)			0	0	5.5e-05	0.000274	0.000288	6.5e-05	0.000897	0.000515	0.002723	0.006106	0.002582	0.001258	0.002221	0.001449	0.001152	0.000841	0.001463	0.001105	0.001089	0.001258	0.00108	0.000742	0.035751
P(71)			0	0	0.000273	0.000777	0.001009	0.015497	0.017141	0.005521	0.008312	0.003514	0.005555	0.004394	0.006285	0.008289	0.010573	0.010963	0.008105	0.002578	0.000639	0.000807	0.000841	0.000904	0.000983
L(21)			0	0	0	0.000137	0.000144	0	0.000472	0.000663	0.000215	0.001098	0.003416	0.004288	0.007741	0.011686	0.011008	0.008683	0.005842	0.003314	0.000319	0.000277	0.00046	0.00083	0.000891
V(62)			0	0	0.000109	0.000137	0.001442	0.001808	0.000378	0.000663	0.000502	0.000615	0.000391	0.001471	0.001365	0.001234	0.000596	0.00093	0.001417	0.002875	0.003659	0.002188	0.002269	0.00414	0.004542
L(73)			0	0	0.000437	0.000959	0.000577	0.000581	0.001747	0.00162	0.000573	0.001142	0.001173	0.001524	0.001497	0.001427	0.001032	0.000831	0.000836	0.001303	0.000874	0.000625	0.001473	0.001657	0.001617
S(68)			0	0	0.000437	0.000868	0.000505	0.000646	0.001417	0.001693	0.003726	0.003602	0.001486	0.001984	0.002159	0.00188	0.001166	0.00161	0.001172	0.000482	0.000382	0.000555	0.000671	0.001225	0.001375
V(58)			0	0	0.000109	0.000183	7.2e-05	0.000323	0.001133	0.000221	0.000143	0.000264	0.000782	0.002002	0.001233	0.000634	0.000482	0.000504	0.001463	0.001034	0.000801	0.001235	0.000885	0.000631	0.000945
V(49)			0	0	0.000437	0.000274	0.000216	0.004584	0.004817	0.001472	0.000215	0	5.2e-05	0.000106	0.000377	0.000827	0.00057	0.000727	0.001436	0.002167	0.000722	0.000647	0.000601	0.000649	0.00058
D(72)			0	0	5.5e-05	0.000183	0	0.000194	0	0.006037	0.00043	0.001581	0.002399	0.00202	0.002587	0.002763	0.001528	0.000665	0.000336	0.000227	0.000131	0.000171	0.000201	0.000218	0.000356
S(55)			0	0	0.000164	4.6e-05	0.00036	0.000258	0.000142	0.000368	7.2e-05	0.000307	0.000209	0.000549	0.000336	0.000657	0.000657	0.000338	0.000382	0.000609	0.00022	0.000431	0.000489	0.000602	0.000672
V(52)			0	0	5.5e-05	4.6e-05	0	0	4.7e-05	0.000147	0	0	0.000104	8.9e-05	0.000122	0.000328	0.00071	0.000244	4.5e-05	0.000142	0.000612	0.000658	0.000754	0.000502	0.000237
V(24)			0	0	0.000109	9.1e-05	7.2e-05	0.000258	0.001181	0.000442	0	4.4e-05	0.000991	0.000478	0.000295	0.000532	0.000295	0.000244	0.000536	0.000538	0.000277	0.000311	0.00039	0.000424	0.000387
R(69)			0	0	0	4.6e-05	0.000793	0.003487	0.000519	0	0.000358	0.002592	0.001121	0.000248	0.000519	0.000272	0.000101	0.000125	0.0001	0.000595	0.000497	0.000459	0.000252	0.000218	0.000155
A(41)			0	0	0.000164	9.1e-05	0.000144	0.000129	9.4e-05	7.4e-05	7.2e-05	0.000176	0.000156	0.000195	0.000285	0.000181	0.000342	0.000265	0.000127	0.00017	0.000435	0.000308	0.00023	0.000384	0.000519
V(5)			0	0	0	0.000411	7.2e-05	0.000129	0.000283	7.4e-05	7.2e-05	4.4e-05	0.001408	0.001417	0.000397	0.000113	0.000228	8.8e-05	9.1e-05	0.000255	0.000183	0.000235	0.000179	0.000151	0.000237
V(70)			0	0	0.000164	0	0	0	4.7e-05	0	7.2e-05	0.000132	0.00013	0.000177	0.000306	0.000453	0.000268	0.000182	0.000218	0.000297	8.9e-05	5.9e-05	0.000169	0.000269	0.000306
T(30)			0	0	0	9.1e-05	0.000505	0.000517	0.000189	0.001399	0.001648	0.000351	0.000209	0.000159	0.000285	0.000374	0.000221	0.000197	0.0002	0.000198	5.8e-05	5.9e-05	8.3e-05	0.000188	0.000224
S(67)			0	0	0	9.1e-05	0	6.5e-05	0	7.4e-05	0.000143	0.001318	0.000313	0.000159	0.000143	7.9e-05	0.000107	0.000156	0.000227	0.000382	0.00011	0.000188	0.000195	0.000199	0.000181
F(26)			0	0	0	0.00032	0	0	0.000236	0.000736	0.000573	0.000703	7.8e-05	1.8e-05	0.000153	9.1e-05	0.000127	0.000218	0.000127	2.8e-05	0.000403	0.000314	0.000147	0.000118	8.4e-05
R(61)			0.002137	0	0.000164	0	7.2e-05	6.5e-05	0.000519	0.000147	0	0.000132	7.8e-05	8.9e-05	8.1e-05	0.000125	7.4e-05	0.000145	0.000164	0.000241	0.000173	0.000196	0.000268	0.000177	0.000227
N(66)			0	0	0	0.000183	0.000288	0	0	0.000147	0	8.8e-05	0.000235	1.8e-05	5.1e-05	7.9e-05	0.000194	0.000104	5.5e-05	5.7e-05	5e-06	9.8e-05	0.000214	0.000221	0.00016
V(75)			0	0	0	0	0	0	0.001181	0.001104	0	0.000132	5.2e-05	0.000213	0.000357	0.000374	0.000114	0.000197	9.1e-05	0.000127	0.00011	8.7e-05	7.4e-05	4.4e-05	6.6e-05
S(16)			0	0	0	0	0	0	4.7e-05	0	0	0	2.6e-05	7.1e-05	6.1e-05	5.7e-05	6.7e-05	4.7e-05	0.000109	1.4e-05	0.00011	7.3e-05	0.000144	0.000166	0.000313
E(8)			0	0	5.5e-05	9.1e-05	0	6.5e-05	0.000142	0.001031	0.000287	0.000264	0.000495	8.9e-05	6.1e-05	0.000102	9.4e-05	7.3e-05	0.000191	0.000312	0.000236	0.000106	7.7e-05	8.9e-05	8.4e-05
L(51)			0	0	0	0	0.000288	0.000194	0.000378	0.000663	0.000717	0.002899	0.001382	0.00023	5.1e-05	0.000102	2e-05	7.8e-05	1.8e-05	1.4e-05	6.8e-05	6.7e-05	8.6e-05	3.7e-05	2.8e-05
C(43)			0	0	0	0	0.000144	6.5e-05	0.000378	0.000221	0.000215	4.4e-05	2.6e-05	7.1e-05	1e-05	0.000181	0.000154	4.2e-05	7.3e-05	9.9e-05	9.9e-05	9.5e-05	8e-05	9.2e-05	0.000224
I(46)			0	0	0	0	0	0	0	0	0	0.00022	0	1.8e-05	1e-05	1.1e-05	1.3e-05	2.6e-05	9e-06	0	0.000168	0.000101	0.000256	0.000251	9.4e-05
L(19)			0	0	0	9.1e-05	0	6.5e-05	0.000189	0	7.2e-05	0.000176	0	0.000159	7.1e-05	7.9e-05	0.000134	0.000203	0.000345	0.000212	2.6e-05	6.4e-05	0.000125	6.3e-05	4.3e-05
F(4)			0	0	0	0	0	0	4.7e-05	0.000147	0.000143	0	2.6e-05	1.8e-05	2e-05	2.3e-05	2.7e-05	5e-06	1.8e-05	0	3.1e-05	1.7e-05	2.6e-05	0.000236	0.000339
C(44)			0	0	0	0	0	0	0	0	0	8.8e-05	0	0	5.1e-05	0.00017	0.000275	0.000192	5.5e-05	4.2e-05	2.6e-05	1.1e-05	4.8e-05	4.1e-05	0.000196
S(50)			0	0	0	9.1e-05	7.2e-05	0	0	0.00081	7.2e-05	4.4e-05	0.00013	0.000106	4.1e-05	5.7e-05	5.4e-05	8.3e-05	0.000154	9.9e-05	3.7e-05	5e-05	0.000109	0.000103	4.8e-05
F(23)			0	0	0	0	0	0	0	0	0	0	0	1.8e-05	2e-05	4.5e-05	2.7e-05	2.1e-05	0	1.4e-05	0.000152	8.7e-05	0.000102	8.1e-05	8.7e-05
N(64)			0	0	0	0.000137	0.000216	6.5e-05	0	0	7.2e-05	4.4e-05	5.2e-05	3.5e-05	4.1e-05	0.000113	0.000101	9.3e-05	0.0002	1.4e-05	0	1.4e-05	2.9e-05	7.7e-05	0.000115
L(18)			0	0	0	0	0	0	0	0.000147	0	8.8e-05	0	8.9e-05	7.1e-05	5.7e-05	0.000355	0.000114	2.7e-05	1.4e-05	5e-06	3.9e-05	2.9e-05	4.8e-05	5.3e-05
A(22)			0	0	0	4.6e-05	0	0.000194	0.000283	0.000294	0	0	0	8.9e-05	7.1e-05	6.8e-05	9.4e-05	5.7e-05	7.3e-05	9.9e-05	2.1e-05	5.6e-05	6.1e-05	8.1e-05	4.3e-05
E(7)			0	0	5.5e-05	0	0	6.5e-05	0	0.000147	7.2e-05	4.4e-05	5.2e-05	0.000177	0.000153	0.000102	5.4e-05	1e-05	3.6e-05	2.8e-05	3.1e-05	3.1e-05	4.8e-05	4.8e-05	0.00013
I(33)			0.002137	0	0	0	0	0	0	7.4e-05	0	0	0.000261	0.000177	2e-05	3.4e-05	2.7e-05	1.6e-05	3.6e-05	4.2e-05	3.1e-05	3.6e-05	4.5e-05	7.4e-05	0.00015
G(10)			0	0	0	4.6e-05	0	0	4.7e-05	0.000147	7.2e-05	0	0.000209	7.1e-05	3.1e-05	5.7e-05	9.4e-05	3.1e-05	4.5e-05	0	6.3e-05	0.000104	6.4e-05	8.1e-05	1.8e-05
L(74)			0	0	5.5e-05	0	7.2e-05	0	4.7e-05	0	0.000215	4.4e-05	0.000104	0.000124	0.000173	0.000125	4.7e-05	3.1e-05	0	1.4e-05	6.3e-05	5.3e-05	3.8e-05	4.1e-05	8.1e-05
L(37)			0	0	5.5e-05	4.6e-05	7.2e-05	6.5e-05	0	7.4e-05	0.000143	4.4e-05	2.6e-05	3.5e-05	4.1e-05	7.9e-05	6e-05	2.1e-05	2.7e-05	5.7e-05	3.1e-05	5.3e-05	4.5e-05	2.6e-05	9.4e-05
F(20)			0	0	0	0.000594	0	0.000194	0.000142	0	0	4.4e-05	0.000183	7.1e-05	4.1e-05	5.7e-05	1.3e-05	6.8e-05	0	1.4e-05	0	1.7e-05	2.6e-05	8.9e-05	6.6e-05
A(36)			0	0	0	4.6e-05	0	0	0	7.4e-05	0.000143	0.000132	0	8.9e-05	4.1e-05	6.8e-05	6e-05	5.2e-05	3.6e-05	4.2e-05	3.7e-05	5.9e-05	4.5e-05	5.5e-05	3.3e-05
S(3)			0	0	0	0.000137	0	6.5e-05	0	0	0	4.4e-05	0	7.1e-05	9.2e-05	0.000113	8.7e-05	3.1e-05	0	1.4e-05	4.7e-05	7.8e-05	3.5e-05	3e-05	2.8e-05
T(11)			0	0	0	0	0	0	4.7e-05	0	0	8.8e-05	0.000391	5.3e-05	2e-05	2.3e-05	5.4e-05	2.1e-05	0	4.2e-05	2.1e-05	4.8e-05	3.2e-05	3e-05	4.6e-05
S(60)			0	0	5.5e-05	0	0	0	0	7.4e-05	0	4.4e-05	0	5.3e-05	3.1e-05	6.8e-05	2.7e-05	5e-06	2.7e-05	1.4e-05	2.1e-05	2.2e-05	5.4e-05	4.8e-05	6.1e-05
V(14)			0	0	0	0	0	6.5e-05	0	0	0	0	0	0	3.1e-05	4.5e-05	6e-05	8.3e-05	4.5e-05	2.8e-05	1e-05	2.8e-05	5.1e-05	2.6e-05	3.6e-05
I(13)			0	0	0	0	0	6.5e-05	0	7.4e-05	0	0	0	3.5e-05	8.1e-05	5.7e-05	4e-05	4.7e-05	2.7e-05	1.4e-05	3.1e-05	3.4e-05	4.5e-05	2.6e-05	2.5e-05
F(56)			0	0	0	0	0	0	4.7e-05	7.4e-05	7.2e-05	0	0	3.5e-05	0.000112	0.000204	3.4e-05	1.6e-05	1.8e-05	0	1.6e-05	1.1e-05	1.9e-05	3e-05	1.5e-05
L(27)			0	0	0	0	7.2e-05	0	0.000142	7.4e-05	0	0	2.6e-05	1.8e-05	3.1e-05	3.4e-05	7e-06	5e-06	9e-06	4.2e-05	1e-05	2.2e-05	4.2e-05	4.8e-05	3.3e-05
L(65)			0	0	0	0	0	0	0	7.4e-05	0	0	0	1.8e-05	0	1.1e-05	7e-06	0	9e-06	9.9e-05	6.8e-05	3.1e-05	1.6e-05	3e-05	3.3e-05
S(6)			0.002137	0	0	0	0	0	0.000189	0.000147	0	0	0	1.8e-05	5.1e-05	3.4e-05	7.4e-05	5e-06	1.8e-05	0	4.2e-05	6e-06	1.3e-05	2.2e-05	5e-06
K(63)			0	0	5.5e-05	4.6e-05	7.2e-05	6.5e-05	0	0	0	0	2.6e-05	0	0	1.1e-05	7e-06	0	0	1.4e-05	1e-05	6.7e-05	3.2e-05	7e-06	1.5e-05
V(47)			0	0	0	0	0.000288	0	9.4e-05	0	0	4.4e-05	0	1.8e-05	1e-05	0	0	2.1e-05	1.8e-05	8.5e-05	5e-06	2.2e-05	3.2e-05	2.2e-05	1e-05
Y(42)			0	0	0	4.6e-05	0	0	4.7e-05	0	0	0	0	0	0	1.1e-05	7e-06	2.1e-05	0	1.4e-05	0	1.1e-05	0	3.3e-05	5.3e-05
K(53)			0	0	0	0	0	0	0	0	0	8.8e-05	0	1.8e-05	3.1e-05	2.3e-05	7e-06	3.6e-05	1.8e-05	0	0	8e-06	5.1e-05	1.1e-05	5e-06
N(48)			0	0	0	0	0	0	0	0	7.2e-05	0	0	1.8e-05	2e-05	9.1e-05	7e-06	1e-05	9e-06	7.1e-05	3.1e-05	2.5e-05	3e-06	4e-06	3e-06
C(40)			0	0	0	0	0	0	0	0	0	4.4e-05	0	0	0	0	7e-06	2.6e-05	0.0001	0	0	1.1e-05	1e-05	7e-06	1e-05
A(32)			0	0	0	0	0	0	0	0	0	0	2.6e-05	0	2e-05	1.1e-05	0	2.6e-05	1.8e-05	2.8e-05	3.1e-05	3e-06	1.3e-05	7e-06	1e-05
N(45)			0	0	0	0	0	0	0	7.4e-05	0	4.4e-05	0	0	1e-05	0	1.3e-05	5e-06	0	1.4e-05	2.6e-05	1.1e-05	2.2e-05	7e-06	1e-05
V(29)			0	0	0	0	0	0	0	0	0	4.4e-05	2.6e-05	0	1e-05	2.3e-05	7e-06	0	0	0	1e-05	1.7e-05	6e-06	1.1e-05	1.8e-05
Y(59)			0	0	0	0	0	0	0	0	0	0	0	1.8e-05	3.1e-05	0	0	0	0	0	0	2e-05	3.5e-05	4e-06	8e-06
V(25)			0	0	5.5e-05	0	0	0	0	7.4e-05	0	0	0	0	0	1.1e-05	7e-06	5e-06	0	0	5e-06	1.1e-05	1.6e-05	4e-06	1.8e-05
P(54)			0	0	0	0	0	6.5e-05	4.7e-05	7.4e-05	0	4.4e-05	2.6e-05	0	1e-05	0	7e-06	5e-06	1.8e-05	0	0	1.7e-05	6e-06	4e-06	8e-06
V(17)			0	0	0	0	0	0	0	0	0	8.8e-05	0	1.8e-05	1e-05	0	7e-06	5e-06	0	0	0	1.7e-05	1.6e-05	0	3e-06
L(12)			0	0	0	0	0	0	0	0	7.2e-05	0	0	0	0	0	7e-06	0	0	0	1e-05	8e-06	1.6e-05	0	8e-06
L(28)			0	0	0	0	0	0	0	0	0	0	0	0	0	0	0	1e-05	0	1.4e-05	2.1e-05	8e-06	3e-06	7e-06	3e-06
N(15)			0	0	5.5e-05	0	0	0	0	0	0	0	0	0	0	0	1.3e-05	2.6e-05	0	0	1e-05	3e-06	6e-06	0	3e-06
M(1)			0	0	0	0	0	0	0	0.000147	0	0	0	1.8e-05	0	1.1e-05	0	1e-05	9e-06	1.4e-05	0	3e-06	0	0	0
L(34)			0	0	0	0	0	0	0	7.4e-05	0	0	0	0	1e-05	0	0	5e-06	0	0	0	0	1e-05	7e-06	3e-06
T(35)			0	0	0	0	0	0	0	0	0	0	0	0	0	0	7e-06	1e-05	0	1.4e-05	5e-06	6e-06	0	0	0
R(38)			0	0	0	0	0	0	0	0	0	0	0	0	0	1.1e-05	0	0	0	0	1e-05	0	0	1.1e-05	3e-06
L(31)			0	0	0	0	0	0	0	7.4e-05	0	0	0	0	0	0	0	5e-06	0	0	1e-05	0	6e-06	0	0
Y(2)			0	0	0	0	0	0.000129	0	0	0	4.4e-05	0	0	0	0	0	5e-06	0	0	0	0	0	0	0
L(39)			0	0	0	0	0	0	4.7e-05	0	0	0	0	0	0	0	7e-06	0	9e-06	0	0	0	0	0	0
Y(57)			0	0	0	0	0	0	0	0	0	0	0	0	0	0	0	5e-06	0	0	0	0	3e-06	0	3e-06

## Sheet: Occeania
	2019-11-30	2019-12-31	2020-01-31	2020-02-29	2020-03-31	2020-04-30	2020-05-31	2020-06-30	2020-07-31	2020-08-31	2020-09-30	2020-10-31	2020-11-30	2020-12-31	2021-01-31	2021-02-28	2021-03-31	2021-04-30	2021-05-31	2021-06-30	2021-07-31	2021-08-31	2021-09-30	2021-10-31	2021-11-30
T(9)			0	0	0.00077	0.001055	0	0	0	0.000189	0	0	0	0	0.052288	0	0	0	0	0	0	0	0	0.000215	0.15901
P(71)			0	0	0	0	0	0	0.000303	0.000189	0.001017	0	0	0.021084	0.039216	0.020833	0.06	0.063291	0.023256	0.01699	0	0.00015	0	0.00043	0
L(74)			0	0	0	0	0	0	0.002122	0.003976	0	0	0	0	0	0	0	0	0	0	0	0	0	0	0
S(68)			0	0	0.00077	0.001055	0	0	0.001364	0.000947	0	0	0	0	0	0	0.003333	0	0	0	0	0	0.000489	0.00043	0.000132
L(21)			0	0	0	0	0	0	0.000758	0	0	0	0	0.003012	0.006536	0.013889	0.006667	0.00211	0.005168	0	0.000549	0.000449	0	0.000215	0
V(62)			0	0	0	0	0	0	0.000152	0	0	0	0	0	0	0.006944	0	0.016878	0.018088	0	0	0	0.000163	0	0.000263
L(73)			0	0	0.001925	0.00211	0	0	0	0.000189	0	0	0	0.003012	0	0.006944	0	0	0	0	0.000275	0.000449	0.000163	0.000645	0.000132
V(49)			0	0	0	0	0	0	0	0	0	0	0	0	0.013072	0	0	0	0	0	0.000275	0	0.001141	0	0
V(58)			0	0	0	0	0	0	0	0	0	0	0	0	0	0	0	0	0.002584	0	0	0	0.000163	0.001935	0
V(24)			0	0	0	0	0	0	0	0	0	0	0	0	0	0	0	0	0	0	0	0.00015	0.000163	0	0.001185
R(61)			0	0	0.000385	0	0	0	0	0.000189	0	0	0	0	0	0	0.01	0	0	0	0	0.000299	0	0	0
C(43)			0	0	0	0	0.003745	0	0	0.000189	0	0	0	0	0	0	0	0.00211	0	0	0.000275	0	0	0	0.000132
R(69)			0	0	0	0.001055	0	0	0	0	0	0	0	0	0	0	0	0	0	0	0	0.00015	0	0.00043	0.000132
T(30)			0	0	0	0	0	0	0	0.000379	0	0.003257	0	0	0	0	0	0	0	0	0	0	0	0	0.000132
L(51)			0	0	0	0	0	0	0	0	0	0	0	0	0	0	0	0	0	0	0	0.000299	0.000326	0	0
A(22)			0	0	0.000385	0	0	0	0	0.000189	0.001017	0	0	0	0	0	0	0	0	0	0	0	0	0	0
N(66)			0	0	0.000385	0.00211	0	0	0	0	0	0	0	0	0	0	0	0	0	0	0	0	0	0	0
L(37)			0	0	0	0	0	0	0	0.000189	0	0	0	0	0	0	0	0	0	0	0.000275	0	0	0.000215	0
V(47)			0	0	0	0	0	0	0	0	0	0	0	0	0	0	0	0	0	0	0	0	0	0	0.000263
G(10)			0	0	0	0	0	0	0	0.000189	0	0	0	0	0	0	0	0	0	0	0	0	0	0	0.000132
V(52)			0	0	0.000385	0	0	0	0.000152	0	0	0	0	0	0	0	0	0	0	0	0	0	0	0	0
S(55)			0	0	0.000385	0	0	0	0	0	0	0	0	0	0	0	0	0	0	0	0	0.00015	0	0	0
A(41)			0	0	0	0	0	0	0	0	0	0	0	0	0	0	0	0	0	0	0	0	0.000326	0	0
D(72)			0	0	0	0	0	0	0	0	0	0	0	0	0.003268	0	0	0	0	0	0	0	0	0	0.000132
F(56)			0	0	0	0	0	0	0	0	0	0	0	0	0	0	0	0	0	0	0	0	0	0.000215	0.000132
S(67)			0	0	0	0	0	0	0.000152	0	0	0	0	0	0	0	0	0	0	0	0.000275	0	0	0	0
V(14)			0	0	0	0	0	0	0	0.000189	0	0	0	0	0	0	0	0	0	0	0	0.00015	0	0	0
V(5)			0	0	0	0	0	0	0.000303	0	0	0	0	0	0	0	0	0	0	0	0	0	0	0	0
Y(42)			0	0	0	0	0	0	0	0	0	0	0	0	0.003268	0	0	0	0	0	0	0	0	0	0
V(75)			0	0	0	0	0	0	0	0.000189	0	0	0	0	0	0	0	0	0	0	0	0	0	0	0
V(25)			0	0	0	0	0	0	0	0.000189	0	0	0	0	0	0	0	0	0	0	0	0	0	0	0
F(4)			0	0	0	0	0	0	0	0	0	0	0	0	0	0	0.003333	0	0	0	0	0	0	0	0
I(46)			0	0	0	0	0	0	0.000152	0	0	0	0	0	0	0	0	0	0	0	0	0	0	0	0
V(17)			0	0	0	0	0	0	0.000152	0	0	0	0	0	0	0	0	0	0	0	0	0	0	0	0
F(23)			0	0	0	0	0	0	0	0.000189	0	0	0	0	0	0	0	0	0	0	0	0	0	0	0
Y(57)			0	0	0	0	0	0	0	0	0	0	0	0	0	0	0	0	0	0	0	0.00015	0	0	0
Y(59)			0	0	0	0.001055	0	0	0	0	0	0	0	0	0	0	0	0	0	0	0	0	0	0	0
S(6)			0	0	0	0	0	0	0	0	0	0	0	0	0	0	0	0	0	0.001214	0	0	0	0	0
F(20)			0	0	0	0	0	0	0	0	0	0	0	0	0	0	0	0	0	0	0	0	0	0	0
L(19)			0	0	0	0	0	0	0	0	0	0	0	0	0	0	0	0	0	0	0	0	0	0	0
L(18)			0	0	0	0	0	0	0	0	0	0	0	0	0	0	0	0	0	0	0	0	0	0	0
S(3)			0	0	0	0	0	0	0	0	0	0	0	0	0	0	0	0	0	0	0	0	0	0	0
S(16)			0	0	0	0	0	0	0	0	0	0	0	0	0	0	0	0	0	0	0	0	0	0	0
N(15)			0	0	0	0	0	0	0	0	0	0	0	0	0	0	0	0	0	0	0	0	0	0	0
Y(2)			0	0	0	0	0	0	0	0	0	0	0	0	0	0	0	0	0	0	0	0	0	0	0
I(13)			0	0	0	0	0	0	0	0	0	0	0	0	0	0	0	0	0	0	0	0	0	0	0
L(12)			0	0	0	0	0	0	0	0	0	0	0	0	0	0	0	0	0	0	0	0	0	0	0
E(8)			0	0	0	0	0	0	0	0	0	0	0	0	0	0	0	0	0	0	0	0	0	0	0
E(7)			0	0	0	0	0	0	0	0	0	0	0	0	0	0	0	0	0	0	0	0	0	0	0
T(11)			0	0	0	0	0	0	0	0	0	0	0	0	0	0	0	0	0	0	0	0	0	0	0
R(38)			0	0	0	0	0	0	0	0	0	0	0	0	0	0	0	0	0	0	0	0	0	0	0
F(26)			0	0	0	0	0	0	0	0	0	0	0	0	0	0	0	0	0	0	0	0	0	0	0
L(27)			0	0	0	0	0	0	0	0	0	0	0	0	0	0	0	0	0	0	0	0	0	0	0
V(70)			0	0	0	0	0	0	0	0	0	0	0	0	0	0	0	0	0	0	0	0	0	0	0
L(65)			0	0	0	0	0	0	0	0	0	0	0	0	0	0	0	0	0	0	0	0	0	0	0
N(64)			0	0	0	0	0	0	0	0	0	0	0	0	0	0	0	0	0	0	0	0	0	0	0
K(63)			0	0	0	0	0	0	0	0	0	0	0	0	0	0	0	0	0	0	0	0	0	0	0
S(60)			0	0	0	0	0	0	0	0	0	0	0	0	0	0	0	0	0	0	0	0	0	0	0
P(54)			0	0	0	0	0	0	0	0	0	0	0	0	0	0	0	0	0	0	0	0	0	0	0
K(53)			0	0	0	0	0	0	0	0	0	0	0	0	0	0	0	0	0	0	0	0	0	0	0
S(50)			0	0	0	0	0	0	0	0	0	0	0	0	0	0	0	0	0	0	0	0	0	0	0
N(48)			0	0	0	0	0	0	0	0	0	0	0	0	0	0	0	0	0	0	0	0	0	0	0
N(45)			0	0	0	0	0	0	0	0	0	0	0	0	0	0	0	0	0	0	0	0	0	0	0
C(44)			0	0	0	0	0	0	0	0	0	0	0	0	0	0	0	0	0	0	0	0	0	0	0
C(40)			0	0	0	0	0	0	0	0	0	0	0	0	0	0	0	0	0	0	0	0	0	0	0
L(39)			0	0	0	0	0	0	0	0	0	0	0	0	0	0	0	0	0	0	0	0	0	0	0
A(36)			0	0	0	0	0	0	0	0	0	0	0	0	0	0	0	0	0	0	0	0	0	0	0
T(35)			0	0	0	0	0	0	0	0	0	0	0	0	0	0	0	0	0	0	0	0	0	0	0
L(34)			0	0	0	0	0	0	0	0	0	0	0	0	0	0	0	0	0	0	0	0	0	0	0
I(33)			0	0	0	0	0	0	0	0	0	0	0	0	0	0	0	0	0	0	0	0	0	0	0
A(32)			0	0	0	0	0	0	0	0	0	0	0	0	0	0	0	0	0	0	0	0	0	0	0
L(31)			0	0	0	0	0	0	0	0	0	0	0	0	0	0	0	0	0	0	0	0	0	0	0
V(29)			0	0	0	0	0	0	0	0	0	0	0	0	0	0	0	0	0	0	0	0	0	0	0
L(28)			0	0	0	0	0	0	0	0	0	0	0	0	0	0	0	0	0	0	0	0	0	0	0
M(1)			0	0	0	0	0	0	0	0	0	0	0	0	0	0	0	0	0	0	0	0	0	0	0

## Sheet: South America
	2019-11-30	2019-12-31	2020-01-31	2020-02-29	2020-03-31	2020-04-30	2020-05-31	2020-06-30	2020-07-31	2020-08-31	2020-09-30	2020-10-31	2020-11-30	2020-12-31	2021-01-31	2021-02-28	2021-03-31	2021-04-30	2021-05-31	2021-06-30	2021-07-31	2021-08-31	2021-09-30	2021-10-31	2021-11-30
T(9)			0	0	0	0.001176	0.000863	0.003112	0	0.003646	0.00246	0.002191	0.001847	0	0	0.00108	0.00074	0.001415	0.001203	0.001198	0.001036	0.000864	0.000216	0.000405	0.047204
P(71)			0	0	0.001709	0.000588	0.001726	0.001037	0.003141	0.001823	0.00123	0	0	0.000564	0.002037	0.002699	0.008432	0.005078	0.009024	0.006052	0.004203	0.002765	0.000971	0.001012	0.000857
V(58)			0	0	0	0.002941	0.045729	0.030083	0.043979	0.021878	0.01476	0.008762	0.00554	0.003946	0.002716	0.00108	0.001479	0.001582	0.001203	0.001639	0.001324	0.001094	0.000755	0.000607	0.000389
A(41)			0	0	0	0	0	0	0.001047	0.000912	0	0	0	0.000564	0	0.00108	0.001183	0.000583	0.000258	0.000567	0.001497	0.003629	0.005825	0.004855	0.00257
L(73)			0	0	0	0.001176	0	0	0.003141	0	0.00492	0.001095	0.00277	0.003382	0.002037	0.00081	0.001036	0.002248	0.001031	0.001891	0.003512	0.002131	0.000971	0.001349	0.002025
R(69)			0	0	0	0	0	0	0	0	0	0	0.000923	0.001691	0.000679	0.003779	0.004734	0.005411	0.004727	0.00208	0.001382	0.000346	0.000216	0.000337	0.000234
S(68)			0.034483	0	0.000855	0.000588	0	0.001037	0.001047	0.002735	0.00369	0.014239	0.003693	0.001691	0.002716	0.002429	0.002367	0.002165	0.001977	0.001702	0.001727	0.001613	0.000863	0.001012	0.000545
L(51)			0	0	0	0	0	0	0	0	0	0	0	0	0	0	0	0	8.6e-05	0.000189	0.000576	0.002246	0.003452	0.0029	0.004128
V(62)			0	0	0	0.001176	0.000863	0	0.002094	0.000912	0	0.002191	0.000923	0.001691	0.002376	0.00108	0.002219	0.001332	0.001633	0.000883	0.00167	0.001325	0.001348	0.001214	0.000701
L(21)			0	0	0	0.001176	0	0	0	0.000912	0	0	0.000923	0	0.000679	0.00135	0.001331	0.000416	0.001117	0.001576	0.001209	0.000979	0.001186	0.000809	0.000935
S(55)			0	0	0	0	0	0.001037	0.001047	0	0	0.001095	0	0.001127	0.000679	0.00027	0.00074	0.000167	0.000859	0.00145	0.00023	0.000634	0.001456	0.00209	0.000779
V(49)			0	0	0	0.000588	0	0	0.001047	0.000912	0	0	0	0.001127	0.000679	0.00027	0.001331	8.3e-05	0.000945	0.000504	0.000288	0.000691	0.000324	0.000202	0.000545
V(24)			0	0	0	0.002353	0.002588	0.002075	0.001047	0.000912	0.00369	0.002191	0.001847	0	0	0	0.000592	0.00025	0.000258	0.000378	0.000403	0.000864	0.00027	0.00027	0.000234
D(72)			0	0	0	0	0	0.001037	0	0	0	0.001095	0	0.000564	0.000679	0.00108	0.000296	0.000666	0.000774	0.000567	0.000345	0.000346	0.000162	0.000405	0.000312
L(74)			0	0	0	0	0	0	0	0	0	0	0	0	0.000339	0.00027	0	0	8.6e-05	6.3e-05	0.000115	0.000749	0.000701	0.000337	0.000234
T(30)			0	0	0	0	0	0	0	0	0	0.001095	0	0	0	0.00081	0	0.0005	0.000602	0.000378	0.000288	0.000346	0.000162	6.7e-05	7.8e-05
V(5)			0	0	0	0	0	0	0.002094	0.010027	0	0.002191	0	0	0	0	0	0.000167	8.6e-05	0	0	0.000173	0.000324	0.000202	0.000156
E(8)			0	0	0	0	0	0	0	0	0	0	0	0.000564	0	0	0.000296	0.000333	8.6e-05	0.000946	0	0.00023	5.4e-05	0	7.8e-05
V(75)			0	0	0	0	0	0	0	0	0.00123	0.001095	0	0	0.000339	0.00135	0.001479	0.000333	0	0	0.000173	0	0	0	0
R(61)			0	0	0	0	0	0	0	0.002735	0	0	0	0	0.000339	0	0.000148	0.000167	0.000172	0.000126	0.000173	5.8e-05	0.000324	6.7e-05	7.8e-05
V(70)			0	0	0	0.000588	0	0	0.001047	0	0	0	0	0.000564	0	0	0.000148	8.3e-05	0	6.3e-05	5.8e-05	0.000346	0.000216	0.00027	0
C(43)			0	0	0	0.000588	0	0	0	0.000912	0.00738	0.001095	0	0	0	0	0	0	0	6.3e-05	0.000173	0	0.000162	0	0.000156
V(52)			0	0	0.000855	0	0	0	0	0	0	0	0	0	0	0	0.000296	0.000167	0.000172	0.000126	5.8e-05	5.8e-05	0.000216	0.000135	7.8e-05
L(19)			0	0	0	0	0	0	0	0	0	0	0.000923	0	0.000339	0	0.000444	0	0.000172	6.3e-05	0.000173	5.8e-05	5.4e-05	0	0.000156
N(66)			0	0	0	0	0	0	0	0	0	0	0	0	0	0	0	0	8.6e-05	6.3e-05	5.8e-05	0.000115	0	0.00027	0.000312
F(26)			0	0	0	0	0	0	0	0	0	0	0	0.000564	0	0	0	0.000333	0.000172	6.3e-05	5.8e-05	0.00023	0	0	0
S(67)			0	0	0	0	0	0	0	0	0	0	0	0	0.000679	0	0	0.000333	0.000172	0	0	0.000173	0.000108	0	0
S(6)			0	0	0	0	0	0	0	0.000912	0	0	0.000923	0.000564	0	0	0	0.000333	8.6e-05	0	5.8e-05	5.8e-05	5.4e-05	0	0
F(4)			0	0	0	0	0	0	0	0.003646	0	0	0	0	0	0	0	0	8.6e-05	0	0	0	5.4e-05	0.000135	7.8e-05
S(50)			0	0	0	0	0	0	0	0	0	0	0	0	0	0	0.000444	0	0	6.3e-05	0	5.8e-05	5.4e-05	0.000202	0
A(36)			0	0	0	0	0.000863	0	0	0	0.00123	0	0	0	0	0.00027	0	0	8.6e-05	0	0	0.000173	5.4e-05	0	0
F(56)			0	0	0	0	0	0	0	0	0	0	0	0	0	0	0	0	0	6.3e-05	0	0.000173	0	0.000202	7.8e-05
S(3)			0	0	0	0	0	0	0	0	0	0	0	0	0	0	0	0.000333	0.000172	6.3e-05	5.8e-05	0	0	0	0
E(7)			0	0	0	0	0	0	0	0.000912	0	0	0	0	0.000339	0	0	0	8.6e-05	0	0.00023	0	0	0	0
I(46)			0	0	0	0	0	0	0	0	0	0	0	0	0	0	0.000444	0.000167	0	0	0	0	0	0	7.8e-05
P(54)			0	0	0	0	0	0	0	0	0	0	0	0.000564	0	0	0.000296	8.3e-05	0	6.3e-05	0	5.8e-05	0	0	0
A(22)			0	0	0	0	0.000863	0	0	0	0	0	0	0	0.000339	0	0	0	0	0	5.8e-05	0	0	6.7e-05	7.8e-05
F(23)			0	0	0	0	0	0	0	0.000912	0	0	0	0	0	0	0	0	0	6.3e-05	0.000115	5.8e-05	0	0	0
I(33)			0	0	0	0	0	0	0	0.000912	0	0	0	0	0	0.00054	0	0	0	6.3e-05	5.8e-05	0	0	0	0
N(64)			0	0	0.000855	0	0	0	0	0	0	0	0	0	0	0	0	0	0	6.3e-05	5.8e-05	5.8e-05	0	0	0
S(60)			0	0	0	0	0	0	0	0	0	0	0	0	0	0	0.000148	8.3e-05	0	6.3e-05	5.8e-05	0	0	0	0
T(11)			0	0	0	0	0	0	0	0	0	0.001095	0	0	0	0	0	0	0	0.000126	0	5.8e-05	0	0	0
L(37)			0	0	0	0	0	0	0	0	0.00123	0	0.000923	0	0	0	0	0	0	6.3e-05	5.8e-05	0	0	0	0
V(25)			0	0	0	0	0	0	0	0	0	0	0	0	0	0	0	0	0	6.3e-05	0.000115	0	0	0	7.8e-05
L(27)			0	0	0	0	0	0	0	0	0	0	0	0	0	0	0	8.3e-05	8.6e-05	0.000126	0	0	0	0	0
L(18)			0	0	0	0	0	0	0	0.000912	0	0	0	0	0	0	0.000148	0	8.6e-05	0	0	0	5.4e-05	0	0
V(47)			0	0	0	0	0	0	0	0	0	0	0	0	0	0	0	8.3e-05	0	0	0	0	0.000108	0	0
V(29)			0	0	0	0	0	0	0	0	0	0	0	0	0	0	0	0	0	0	5.8e-05	0.000115	0	0	0
S(16)			0	0	0	0	0	0	0.001047	0	0	0	0	0	0	0	0	0	0	0	0	0.000115	0	0	0
G(10)			0	0	0	0	0	0	0	0	0	0	0	0	0	0	0.000148	0	0	0	5.8e-05	0	0	0	7.8e-05
V(17)			0	0	0	0	0	0	0	0	0	0	0	0	0	0	0	0	0	0	0	0.000115	0	0	0
L(12)			0	0	0	0	0	0	0	0	0	0	0	0	0	0	0	8.3e-05	0	6.3e-05	0	0	0	0	0
C(44)			0	0	0	0	0	0	0	0	0	0	0	0.000564	0	0	0	0	0	0	0	0	0	6.7e-05	0
Y(2)			0	0	0.000855	0	0	0	0	0	0	0	0	0	0	0	0	0	8.6e-05	0	0	0	0	0	0
F(20)			0	0	0	0	0	0	0	0	0	0	0	0	0	0	0	0	8.6e-05	0	0	0	0	0	7.8e-05
V(14)			0	0	0	0	0	0	0	0	0	0	0	0	0	0	0	0	0	0	0	5.8e-05	0	0	0
R(38)			0	0	0	0	0	0	0	0	0	0	0	0	0	0	0	0	8.6e-05	0	0	0	0	0	0
L(28)			0	0	0	0	0	0	0	0	0	0	0	0	0	0	0	0	0	0	0	0	0	0	7.8e-05
C(40)			0	0	0	0	0	0	0	0	0	0	0	0	0	0	0	0	0	0	0	0	0	0	7.8e-05
L(65)			0	0	0	0	0	0	0	0	0	0	0	0	0	0	0	0	0	0	5.8e-05	0	0	0	0
Y(57)			0	0	0	0	0	0	0	0	0	0	0	0	0	0	0	0	0	0	0	0	0	0	7.8e-05
N(48)			0	0	0	0	0	0	0	0	0	0	0	0	0	0	0	0	0	0	0	5.8e-05	0	0	0
N(45)			0	0	0	0	0	0	0	0	0	0	0	0	0	0	0	0	0	0	0	0	0	0	7.8e-05
M(1)			0	0	0	0	0	0	0	0	0	0	0	0	0	0	0	0	0	6.3e-05	0	0	0	0	0
T(35)			0	0	0	0	0	0	0	0	0	0	0	0	0	0	0	0	8.6e-05	0	0	0	0	0	0
L(34)			0	0	0	0	0	0	0	0	0	0	0	0	0	0	0	0	8.6e-05	0	0	0	0	0	0
A(32)			0	0	0	0	0	0	0	0	0	0	0	0	0	0	0	0	0	0	0	5.8e-05	0	0	0
L(39)			0	0	0	0	0	0	0	0	0	0	0	0	0	0	0	0	0	0	0	0	0	0	0
L(31)			0	0	0	0	0	0	0	0	0	0	0	0	0	0	0	0	0	0	0	0	0	0	0
I(13)			0	0	0	0	0	0	0	0	0	0	0	0	0	0	0	0	0	0	0	0	0	0	0
K(53)			0	0	0	0	0	0	0	0	0	0	0	0	0	0	0	0	0	0	0	0	0	0	0
N(15)			0	0	0	0	0	0	0	0	0	0	0	0	0	0	0	0	0	0	0	0	0	0	0
Y(59)			0	0	0	0	0	0	0	0	0	0	0	0	0	0	0	0	0	0	0	0	0	0	0
K(63)			0	0	0	0	0	0	0	0	0	0	0	0	0	0	0	0	0	0	0	0	0	0	0
Y(42)			0	0	0	0	0	0	0	0	0	0	0	0	0	0	0	0	0	0	0	0	0	0	0
