# Supplementary material for: Mutations in SARS-CoV-2 structural proteins: a global analysis
Source: Virol J. 2022 Dec 18;19:220. doi: 10.1186/s12985-022-01951-7 (PMC9759450; doi:10.1186/s12985-022-01951-7)
Supplement: Supplementary file 6 — Additional file 6: Evolutionary trends of the M protein mutation distribution based on the time and geographical areas [file 12985_2022_1951_MOESM6_ESM.xlsx]

## Sheet: Total
	2019-11-30	2019-12-31	2020-01-31	2020-02-29	2020-03-31	2020-04-30	2020-05-31	2020-06-30	2020-07-31	2020-08-31	2020-09-30	2020-10-31	2020-11-30	2020-12-31	2021-01-31	2021-02-28	2021-03-31	2021-04-30	2021-05-31	2021-06-30	2021-07-31	2021-08-31	2021-09-30	2021-10-31	2021-11-30
I(82)		0	0.000513	0	0.000131	1.8e-05	0.000145	0.000225	0.001424	0.000612	0.000328	0.000452	0.000771	0.001495	0.109562	0.011105	0.022679	0.052925	0.158837	0.5831	0.886289	0.963153	0.992048	0.996943	0.955623
D(3)		0	0.003932	0.01405	0.012105	0.008773	0.004669	0.002021	0.001628	0.00811	0.009032	0.004545	0.006663	0.002765	0.002346	0.000639	0.000334	0.000482	0.00045	0.000402	0.000335	0.000392	0.00054	0.000539	0.042221
A(63)		0	0.000171	0	7.5e-05	0.000312	7.2e-05	0.000192	0.000153	0.000255	9.4e-05	0.000127	0.000109	0.00019	0.001628	0.000449	0.000448	0.000475	0.000643	0.00086	0.0008	0.000495	0.000348	0.000357	0.043104
Q(19)		0	0	0	3.8e-05	3.7e-05	0.000253	0.000192	0	0	2.3e-05	2.8e-05	4e-05	9.9e-05	0.001216	8.5e-05	6.6e-05	9.2e-05	0.000107	7.8e-05	3.6e-05	9.6e-05	0.000223	0.000124	0.042853
A(2)		0	0.001368	0	0.001276	0.001468	0.002714	0.006319	0.011394	0.005075	0.004246	0.003628	0.004063	0.004352	0.005697	0.006893	0.006648	0.006255	0.006205	0.004182	0.002861	0.002602	0.004192	0.00494	0.006651
V(70)		0	0.003761	0	0.001689	0.006754	0.006225	0.004394	0.003128	0.002423	0.001408	0.001539	0.001799	0.003661	0.005864	0.010357	0.010395	0.012923	0.012199	0.006376	0.001752	0.000936	0.000998	0.000924	0.00104
A(81)		0	0.000171	0	9.4e-05	0.000184	0	6.4e-05	0	0	0.000141	9.9e-05	0.000376	0.00024	0.000548	0.000422	0.000514	0.001449	0.001545	0.00114	0.002648	0.008776	0.008913	0.007185	0.003261
F(28)		0	0.000513	0.002443	1.9e-05	1.8e-05	0.000181	6.4e-05	2.5e-05	0.000102	0	9.9e-05	0.000208	0.001016	0.003872	0.00642	0.013888	0.016395	0.010893	0.002901	0.000507	0.000122	7.2e-05	7e-05	2.1e-05
S(197)		0	0	0	0.000244	1.8e-05	0	0	0.000102	0.000153	0.000188	5.6e-05	3e-05	3.5e-05	0.000157	3.9e-05	2.2e-05	4e-05	0.000193	0.002871	0.008244	0.007197	0.005019	0.002644	0.001123
T(30)		0	0.000171	0	0	1.8e-05	0.000181	3.2e-05	0	5.1e-05	0	1.4e-05	2e-05	7.8e-05	0.000378	3.5e-05	0.000114	0.000116	8.6e-05	0.00035	0.002211	0.004127	0.005122	0.005304	0.004387
H(125)		0	0.003248	0.001222	0.000338	0.001156	0.001665	0.001315	0.001526	0.007345	0.003777	0.001962	0.002392	0.00182	0.002401	0.002441	0.002069	0.001938	0.002341	0.001505	0.000772	0.000882	0.001464	0.001306	0.001527
D(209)		0	0.002051	0.007941	0.000432	0.00044	0.000869	0.001411	0.001144	0.00051	0.002064	0.002908	0.003806	0.001629	0.000827	0.001097	0.000996	0.001321	0.001661	0.00114	0.000864	0.001175	0.001659	0.001473	0.001101
L(29)		0	0	0	9.4e-05	0.000128	0.000796	0.000577	0.000178	7.7e-05	0.000375	0.000423	0.000326	0.000529	0.000579	0.000395	0.000416	0.000459	0.00115	0.001266	0.001512	0.001588	0.001302	0.001573	0.001486
V(23)		0	0.000342	0	0.000282	0.000349	0.003547	0.00093	0.000585	0.000332	0.000493	0.000282	0.000484	0.000578	0.000633	0.00057	0.001078	0.001454	0.001395	0.001255	0.001235	0.001119	0.001041	0.001057	0.000617
A(69)		0	0.000855	0	0.000394	0.000257	0.000253	0.000289	0.000814	0.000663	0.000469	0.000833	0.000603	0.00043	0.000807	0.000713	0.000594	0.000685	0.000863	0.00067	0.000844	0.001049	0.001097	0.001098	0.001534
H(155)		0	0.000684	0	0.000131	0.000165	0.000362	0.000642	0.00061	0.000612	0.000915	0.001129	0.00178	0.002292	0.001846	0.001592	0.001212	0.00087	0.0016	0.000693	0.000762	0.000616	0.000502	0.000413	0.000375
A(85)		0	0.000171	0.000611	0.00015	0.000275	0.000181	0.000385	0.000483	0.000153	0.000399	0.000325	0.001176	0.001756	0.001832	0.001922	0.001444	0.000839	0.000786	0.000696	0.001075	0.000679	0.000467	0.000582	0.000422
S(94)		0	0.000171	0	7.5e-05	7.3e-05	3.6e-05	0.000128	0.000153	5.1e-05	0.000282	0.000141	6.9e-05	0.000212	0.00014	0.000291	0.00026	0.000177	0.000168	0.002302	0.000621	0.000534	0.000906	0.001427	0.001764
M(109)		0	0	0	0.000188	0.000587	0.000724	0.000289	0.000381	0.000663	0.001103	0.001524	0.002155	0.000966	0.0008	0.000682	0.000691	0.000752	0.000526	0.000708	0.000694	0.00064	0.000677	0.00075	0.000938
S(212)		0	0.000513	0	1.9e-05	0.000128	0.00076	0.000289	0.000636	0.00023	0.000891	0.000353	0.000158	0.000219	0.000504	0.000612	0.00017	0.000104	0.000113	0.000175	0.000996	0.00077	0.000589	0.001148	0.001078
A(98)		0	0	0	3.8e-05	0.00011	0.000181	0.000192	0.000229	0.000255	0.000141	0.000198	0.000168	0.000557	0.000644	0.000577	0.000363	0.000307	0.000327	0.000223	0.00091	0.001308	0.001127	0.000528	0.000333
L(17)		0	0.001197	0	0.000113	0.000202	0.000253	0.000674	0.001577	0.003596	0.003496	0.00415	0.001503	0.000543	0.000681	0.000837	0.00083	0.001111	0.00074	0.000454	0.000313	0.000452	0.000373	0.000302	0.000301
G(89)		0	0	0	1.9e-05	9.2e-05	0	0	0	0	0	1.4e-05	4.9e-05	5.6e-05	9.9e-05	0.000291	0.001707	0.003269	0.001686	0.000831	0.000271	0.000147	0.000223	0.0001	0.000317
L(34)		0	0.000171	0	0.000131	0.000404	0.000253	0.00016	0.000178	0.000204	0.000305	0.000127	0.000504	0.000522	0.00064	0.000655	0.000935	0.000622	0.000545	0.000864	0.00064	0.000997	0.000368	0.000284	0.000261
A(104)		0	0.001197	0.000611	1.9e-05	0.00011	0.000615	9.6e-05	0.000178	0.000281	0.000117	0.000409	0.000623	0.001545	0.000456	0.001081	0.001336	0.001782	0.00227	0.001017	0.000116	4.5e-05	5.4e-05	6.3e-05	5.5e-05
I(76)		0	0.000171	0	9.4e-05	5.5e-05	0.000109	0.000289	0.000102	0.00023	4.7e-05	0.000169	0.000257	0.000522	0.000913	0.000907	0.00121	0.000742	0.000569	0.00041	0.000319	0.000362	0.00054	0.000508	0.000373
K(15)		0	0.000342	0	1.9e-05	0.000349	0.00105	9.6e-05	0	2.6e-05	0.000141	0.000367	0.000178	0.000226	0.00032	0.000333	0.00026	0.000243	0.000303	0.000618	0.000477	0.000442	0.0007	0.000849	0.000624
T(175)		0	0.004957	0.00733	0.019725	0.006148	0.001556	0.001411	0.000381	5.1e-05	0.000399	0.000438	0.000366	0.000282	0.000228	0.000163	0.000168	0.00017	0.00015	0.000112	0.000196	0.000306	0.000308	0.00028	0.000256
T(208)		0	0.000171	0	7.5e-05	0.000422	0.000253	0.000385	0.000203	0.000204	0.000117	0.000339	0.000297	0.001333	0.000528	0.000353	0.000467	0.000399	0.00041	0.000421	0.000273	0.000545	0.000506	0.000435	0.000546
I(52)		0	0	0.001222	5.6e-05	0.000551	0.000362	6.4e-05	0.000153	0.000306	0	5.6e-05	0.000198	0.000381	0.000647	0.00112	0.000236	8.7e-05	7e-05	6.3e-05	0.000325	0.000539	0.000654	0.000758	0.000564
G(6)		0	0	0	5.6e-05	0.000128	0.000253	6.4e-05	5.1e-05	5.1e-05	0.000305	0.000184	0.000158	0.000205	0.000327	0.000136	0.000127	0.000248	0.000226	0.000317	0.000164	0.000255	0.000559	0.000488	0.000869
C(33)		0	0.000684	0	3.8e-05	0.000275	0.000217	0.000738	7.6e-05	0.000128	0.000352	0.000395	0.000188	0.000247	0.000235	0.000248	0.00039	0.000664	0.000505	0.000454	0.000164	0.000222	0.000335	0.00043	0.000569
S(4)		0	0.001538	0	0.000169	0.000294	0.000326	0.000353	0.000381	0.000434	0.000375	0.000395	0.000524	0.000748	0.000582	0.000333	0.000207	0.00026	0.0003	0.000384	0.000411	0.000345	0.000456	0.000468	0.000328
V(10)		0	0	0	0.000113	3.7e-05	3.6e-05	9.6e-05	0.000203	0.000944	0.000188	8.5e-05	0.000237	0.000162	0.000238	0.000577	0.001251	0.001054	0.000973	0.000387	0.00016	0.000126	0.000206	0.000209	0.000175
V(66)		0	0.000171	0	0.000169	0.000349	0.000181	0.00016	0.002162	0.001505	7e-05	0.000494	0.000366	0.000282	0.000289	0.000364	0.000438	0.000489	0.000483	0.000696	0.000247	0.000292	0.000342	0.000396	0.000273
L(87)		0	0	0	0.000263	0.00022	0	3.2e-05	5.1e-05	0.000204	0.000164	0.000169	0.000148	0.000134	0.000473	0.000794	0.000282	0.000303	0.001515	0.0013	0.000341	0.000106	0.00018	0.000338	0.000172
M(84)		0	0	0	3.8e-05	0.000624	0.000145	3.2e-05	0.000381	0.000765	0.000375	0.000198	0.000395	0.000726	0.000923	0.000542	0.000285	0.000241	0.000376	0.000343	0.000305	0.00031	0.000344	0.000299	0.000327
L(46)		0	0.003419	0	0.000244	0.000202	3.6e-05	9.6e-05	0.000127	7.7e-05	2.3e-05	0.000113	5.9e-05	0.000275	0.000436	0.000283	0.000114	0.000135	0.000153	0.000279	0.000217	0.000384	0.000554	0.000516	0.000537
I(48)		0	0.002222	0.000611	5.6e-05	0	0	0	0	0	0.001103	0.000607	0.000811	0.002405	0.001522	0.000728	0.00046	0.00018	0.000116	0.000145	0.000122	8.2e-05	0.000138	0.000227	0.000214
C(86)		0	0.000855	0	0.000169	0.000239	0.000253	6.4e-05	0.000153	0.000128	0.001501	0.002103	0.001364	0.000233	0.000211	0.000108	0.000139	0.000156	0.000141	0.000156	0.000293	0.000319	0.000436	0.000445	0.000337
R(158)		0	0	0.001833	0.000544	9.2e-05	3.6e-05	0.000353	0.000254	5.1e-05	2.3e-05	0.000155	9.9e-05	0.000183	0.000249	0.000353	0.00017	0.00022	0.000511	0.000346	0.000192	0.000231	0.000371	0.000521	0.000449
R(107)		0	0.000171	0	0.000131	0	0.00029	0.000353	0.000178	0.00023	0.000375	0.000169	0.000811	0.000444	0.000671	0.000294	0.000519	0.000284	0.000211	0.000168	0.000104	0.000198	0.000178	0.00026	0.000483
K(162)		0	0	0	1.9e-05	0.000532	0.000326	9.6e-05	7.6e-05	0.000128	0.000164	0.000198	0.000415	0.000296	0.000198	0.000263	0.000302	0.000295	0.000257	0.00032	0.000152	0.000185	0.000256	0.000546	0.000469
A(40)		0	0.000171	0.001222	9.4e-05	5.5e-05	7.2e-05	3.2e-05	0.000102	7.7e-05	7e-05	8.5e-05	0.000109	7.8e-05	0.000123	0.000101	0.000124	0.000191	0.000236	0.000317	0.000241	0.000355	0.000485	0.000464	0.000456
R(146)		0	0	0	9.4e-05	0.00044	3.6e-05	9.6e-05	0.000102	0.000153	9.4e-05	0.000113	0.000158	0.000261	0.000167	0.000116	0.000168	0.000113	0.000181	0.000253	0.000339	0.000432	0.000448	0.000309	0.000303
Q(185)		0	0	0	0	5.5e-05	0.000145	0	0	2.6e-05	2.3e-05	0	5.9e-05	2.1e-05	0.000109	0.000116	3.9e-05	5.9e-05	5.2e-05	0.000123	0.000239	0.000173	0.000364	0.000788	0.000575
S(214)		0	0.000171	0	0.000244	0.00022	0.000109	0.000577	0.000153	0.000536	9.4e-05	0.000113	0.000336	9.9e-05	0.000126	0.000132	0.000163	0.00021	0.000282	0.000261	0.000116	0.000239	0.000238	0.000337	0.000578
S(136)		0	0	0	3.8e-05	9.2e-05	7.2e-05	3.2e-05	0.000229	7.7e-05	0	5.6e-05	0.000119	0.000226	0.000283	0.00031	0.000253	0.000241	0.000196	0.000197	0.000126	0.000159	0.000244	0.000333	0.000585
I(201)		0	0.000684	0	0	0	0	0	2.5e-05	2.6e-05	2.3e-05	0.000155	0.000227	0.000571	0.000453	0.000302	0.000538	0.000912	0.000505	0.000216	6e-05	3e-05	0.000111	0.000211	0.000267
W(75)		0	0	0	0.000206	0.000294	0.00029	0.000674	0.000127	0.000128	0.000164	0.000155	8.9e-05	0.000183	0.000351	0.000302	0.000443	0.000383	0.000542	0.000443	0.000148	9.5e-05	0.000169	0.000184	0.000293
T(7)		0	0	0	0.000113	0.00022	0.00029	0.000257	0.000254	0.000485	0.000258	0.000282	0.000109	0.000127	0.00033	0.000217	0.000175	0.000326	0.000419	0.000194	0.0002	0.000218	0.000298	0.000289	0.000269
R(44)		0	0	0	0	0	3.6e-05	0	0.000102	5.1e-05	0	8.5e-05	0.000297	0.001509	0.000371	0.000256	0.000234	9.5e-05	0.000107	0.000238	0.000215	0.000373	0.000213	0.000259	0.000206
H(148)		0	0.001709	0	5.6e-05	0.002147	0.001303	9.6e-05	0.000153	0.000204	0.000282	0.000339	0.000227	0.000247	0.000245	0.000291	0.000185	0.000135	0.000177	8.9e-05	7.2e-05	0.000171	0.00018	0.00031	0.000409
A(83)		0	0.000171	0	9.4e-05	1.8e-05	0.000181	0.001604	0.001882	0.000587	9.4e-05	0.000226	0.000119	5.6e-05	0.000184	0.000194	0.000148	0.000305	0.00033	0.000387	0.000178	0.000116	0.00019	0.000352	0.00029
A(142)		0	0	0	7.5e-05	0.00022	0.000362	0.001091	0.000127	0.000612	0.000117	0.00024	0.000217	0.000212	0.000272	0.000415	0.00057	0.000392	0.000401	0.000212	0.000108	0.000132	0.000149	0.000171	0.000131
G(78)		0	0.000171	0.000611	0.000169	0.000239	0.000253	0.000417	0.000203	0.00023	0.000188	0.000353	0.000217	0.00019	0.000191	0.000198	0.000139	0.000241	0.000223	0.000313	0.0002	0.000197	0.000319	0.000237	0.000117
K(180)		0	0.002222	0	0	1.8e-05	0	3.2e-05	2.5e-05	0	2.3e-05	0	0.000405	0.00067	0.000988	0.000864	0.00057	0.000503	0.000355	5.2e-05	4e-06	3e-06	1.2e-05	8e-06	3e-06
V(60)		0	0.000513	0.000611	5.6e-05	3.7e-05	0	0.001443	0.003306	0.004055	0.000469	0.000268	0.000257	0.000162	0.000112	0.000108	4.6e-05	0.000158	0.000254	0.000242	0.000383	4.7e-05	7.8e-05	8e-05	4.3e-05
I(80)		0	0	0	7.5e-05	1.8e-05	0	3.2e-05	2.5e-05	0.000893	0.000985	0.000282	0.000129	8.5e-05	0.000116	0.000116	0.000117	0.000111	8.3e-05	4.1e-05	9.2e-05	8.7e-05	0.000273	0.00028	0.000299
C(64)		0	0.000171	0	0.000225	0.000184	0.000434	0.000192	0.000305	0.000153	0.000164	7.1e-05	0.000138	0.000162	0.000119	9.7e-05	0.000105	0.000163	0.000138	0.000279	0.000315	0.000142	0.000184	0.000247	0.000149
E(167)		0	0	0	7.5e-05	0.000165	7.2e-05	0.000321	0.000127	5.1e-05	2.3e-05	1.4e-05	3e-05	5.6e-05	0.000116	8.9e-05	4.1e-05	5.7e-05	0.000211	0.000134	0.000315	0.000208	0.000164	0.000227	0.000253
I(73)		0	0	0	1.9e-05	0	0	0	2.5e-05	0	7e-05	0.000226	0.000217	0.000353	0.000235	0.000205	6.8e-05	7.3e-05	7.3e-05	8.2e-05	8e-05	0.000147	0.000224	0.000234	0.000178
I(97)		0	0	0	0	0	7.2e-05	6.4e-05	0.000127	0.000459	7e-05	0.000113	9.9e-05	9.9e-05	0.00015	0.000248	0.000231	0.000232	0.000303	0.000153	0.000102	7.7e-05	0.000129	9.3e-05	0.000105
L(124)		0	0.000171	0	0.0003	7.3e-05	3.6e-05	6.4e-05	0.000432	2.6e-05	4.7e-05	5.6e-05	0.000168	5.6e-05	0.000112	0.000116	0.000124	0.000165	0.000144	0.000112	0.000176	0.000116	0.000104	0.000217	0.000135
A(68)		0	0	0	1.9e-05	3.7e-05	0.000109	0.000257	0.000203	0.000153	0.000141	4.2e-05	6.9e-05	6.3e-05	0.000146	0.000194	0.000134	9.7e-05	0.000141	0.000242	0.000146	0.000116	0.000169	9.3e-05	8.4e-05
A(188)		0	0.000171	0	0	0.000147	0.000398	0.000481	0.000509	0.000102	4.7e-05	0.000169	0.000178	0.00024	0.000129	0.000159	0.000124	0.000121	7e-05	4.1e-05	6e-05	7.8e-05	0.000104	0.000227	0.000111
A(38)		0	0.000513	0	1.9e-05	5.5e-05	3.6e-05	9.6e-05	0.000254	0.000179	0.000164	0.000113	9.9e-05	0.000169	9.2e-05	0.000124	0.00018	0.000203	0.000272	0.00016	0.000136	7.4e-05	7.7e-05	6.5e-05	7.1e-05
N(207)		0	0	0	0	0	7.2e-05	0.000128	7.6e-05	2.6e-05	9.4e-05	0	2e-05	9.9e-05	7.2e-05	5.8e-05	3.4e-05	0.000104	7.6e-05	0.00035	0.000249	0.000127	0.000129	8e-05	0.000101
T(77)		0	0	0	1.9e-05	3.7e-05	3.6e-05	3.2e-05	5.1e-05	0.000587	0.000282	2.8e-05	0.000188	0.000176	0.000153	0.000132	0.000178	0.000104	0.000144	6e-05	3.6e-05	3.7e-05	5.7e-05	5e-05	0.000149
S(173)		0	0	0	1.9e-05	1.8e-05	7.2e-05	6.4e-05	0.000102	0	0.000235	9.9e-05	5.9e-05	0.000169	8.9e-05	0.000101	0.000161	0.000161	0.000107	8.9e-05	6.2e-05	6.9e-05	7.4e-05	9e-05	0.000115
F(100)		0	0	0	0	5.5e-05	3.6e-05	3.2e-05	5.1e-05	5.1e-05	0	0	5.9e-05	4.2e-05	7.8e-05	7.7e-05	0.000144	0.000121	0.00011	6e-05	3.8e-05	3e-05	0.0001	0.000184	0.00015
L(93)		0	0	0	3.8e-05	1.8e-05	3.6e-05	0	0.000102	0.000102	9.4e-05	4.2e-05	3e-05	4.9e-05	5.1e-05	7e-05	4.9e-05	3.8e-05	4.6e-05	5.6e-05	4.2e-05	6.9e-05	7.5e-05	0.000144	0.000225
M(91)		0	0	0	1.9e-05	0	0	3.2e-05	5.1e-05	0	7e-05	2.8e-05	4e-05	2.1e-05	8.9e-05	4.3e-05	9.5e-05	6.9e-05	4.9e-05	3.4e-05	6.6e-05	9.7e-05	0.000177	0.000139	0.000108
I(24)		0	0	0	0	1.8e-05	0	3.2e-05	2.5e-05	5.1e-05	9.4e-05	2.8e-05	5.9e-05	0.000113	8.5e-05	0.000143	0.000173	5.7e-05	0.000122	8.9e-05	4.2e-05	3.4e-05	7.7e-05	0.000181	8e-05
E(11)		0	0	0	1.9e-05	0	7.2e-05	0	0	5.1e-05	7e-05	5.6e-05	8.9e-05	0.000212	5.1e-05	4.3e-05	2.4e-05	7.3e-05	8.9e-05	3.7e-05	4.8e-05	5.5e-05	0.000124	0.000168	0.000129
I(168)		0	0	0	7.5e-05	1.8e-05	3.6e-05	3.2e-05	2.5e-05	0.000638	0.002534	0.000141	4e-05	5.6e-05	4.4e-05	3.5e-05	1e-05	2.4e-05	2.8e-05	2.2e-05	3.4e-05	9.5e-05	6.6e-05	5.6e-05	0.000148
N(74)		0	0	0	1.9e-05	1.8e-05	3.6e-05	0.000289	0.000127	2.6e-05	0.000141	0.000169	4.9e-05	7.1e-05	7.8e-05	8.9e-05	2.2e-05	0.000104	0.000104	3.4e-05	6.2e-05	2e-05	3.7e-05	5e-05	0.000229
R(101)		0	0	0	0	0	0	0	0.000102	0.000204	4.7e-05	1.4e-05	2e-05	2.8e-05	2.7e-05	4.6e-05	3.7e-05	2.8e-05	6.7e-05	3e-05	2.2e-05	4.4e-05	9.8e-05	0.000159	0.00021
I(161)		0	0	0	0	0	0	3.2e-05	0	2.6e-05	2.3e-05	8.5e-05	5.9e-05	4.2e-05	3.7e-05	7.4e-05	0.000122	0.000189	0.000122	3.4e-05	2.6e-05	6.3e-05	7.5e-05	5.1e-05	0.000127
I(128)		0	0	0	1.9e-05	0	0	3.2e-05	0.000331	0.000408	0	0.000169	5.9e-05	3.5e-05	6.8e-05	0.000182	0.000105	0.000128	5.8e-05	7.4e-05	3e-05	4.7e-05	7.7e-05	0.000111	7.4e-05
V(88)		0	0	0	1.9e-05	1.8e-05	0.000109	3.2e-05	0	0	0.000188	0.000212	0.000168	7.8e-05	8.5e-05	0.000163	0.000129	8.3e-05	4.9e-05	7.4e-05	4.8e-05	8.8e-05	8.1e-05	8.5e-05	4.3e-05
I(49)		0	0	0	7.5e-05	0	0	0	0	0	0	5.6e-05	0.000109	2.1e-05	6.1e-05	7.7e-05	8.8e-05	3.1e-05	6.7e-05	4.1e-05	3.6e-05	0.000149	0.0002	6.8e-05	3.1e-05
E(12)		0	0	0.000611	0	5.5e-05	3.6e-05	0	0	0	2.3e-05	1.4e-05	2e-05	4.9e-05	0.000106	5.4e-05	2.4e-05	0.000213	9.8e-05	7.1e-05	5e-05	0.000103	0.000112	9e-05	3.3e-05
L(129)		0	0	0	0.000319	0.000349	3.6e-05	0	0	2.6e-05	2.3e-05	1.4e-05	1e-05	4.9e-05	2.7e-05	5.8e-05	0.00011	9.7e-05	0.000104	7.1e-05	9.6e-05	1.9e-05	5.1e-05	0.000154	7e-05
W(31)		0	0.000342	0	0.000131	0.001046	0.000326	3.2e-05	2.5e-05	2.6e-05	9.4e-05	1.4e-05	0.000129	5.6e-05	6.8e-05	8.5e-05	9.5e-05	7.3e-05	8.6e-05	3e-05	7.8e-05	3.5e-05	6e-05	6.5e-05	6.7e-05
L(138)		0	0.000171	0	1.9e-05	3.7e-05	3.6e-05	6.4e-05	2.5e-05	0.000128	0.000117	7.1e-05	5.9e-05	0.000212	0.000487	0.000457	3.4e-05	1.4e-05	1.5e-05	4e-06	1.4e-05	1.5e-05	3.5e-05	3.8e-05	2.6e-05
L(90)		0	0	0	0.000338	1.8e-05	3.6e-05	0.000321	0.000305	2.6e-05	2.3e-05	1.4e-05	7.9e-05	4.9e-05	7.2e-05	8.5e-05	8.5e-05	0.000144	0.000101	8.2e-05	4.4e-05	5.4e-05	6.9e-05	6.5e-05	3.4e-05
T(127)		0	0.000171	0	1.9e-05	0	0	0	2.5e-05	0	0	0	4.9e-05	2.8e-05	6.8e-05	6.2e-05	2e-06	5e-05	6.7e-05	4.8e-05	0.000116	8.8e-05	5.4e-05	0.000126	8.9e-05
I(8)		0	0	0	9.4e-05	0.00011	0.000109	0	7.6e-05	5.1e-05	2.3e-05	2.8e-05	3e-05	2.8e-05	8.5e-05	0.000105	5.1e-05	2.1e-05	2.8e-05	3e-05	7.4e-05	6.4e-05	0.00013	8.6e-05	6.5e-05
D(160)		0	0.000171	0	0	0	0	3.2e-05	5.1e-05	5.1e-05	9.4e-05	2.8e-05	1e-05	7.1e-05	0.000112	5.8e-05	4.1e-05	5.9e-05	5.2e-05	8.9e-05	0.000118	7.7e-05	6.6e-05	4.1e-05	6.6e-05
R(186)		0	0	0	1.9e-05	7.3e-05	3.6e-05	6.4e-05	0.000127	2.6e-05	7e-05	4.2e-05	4e-05	4.9e-05	1.7e-05	9.3e-05	4.1e-05	5.7e-05	2.4e-05	5.2e-05	6.8e-05	7.8e-05	7.8e-05	8.6e-05	7.2e-05
I(151)		0	0	0	0	5.5e-05	0	3.2e-05	0	5.1e-05	2.3e-05	1.4e-05	1e-05	2.8e-05	3.1e-05	2.7e-05	0.000239	9e-05	0.000104	6e-05	4.2e-05	3.3e-05	8.6e-05	5.8e-05	4.2e-05
I(144)		0	0	0	1.9e-05	5.5e-05	7.2e-05	3.2e-05	5.1e-05	0	4.7e-05	5.6e-05	4e-05	8.5e-05	8.5e-05	0.000101	5.4e-05	5e-05	6.7e-05	7.1e-05	9.4e-05	4e-05	8e-05	4.1e-05	5.6e-05
D(215)		0	0	0	0	0.000459	0.000796	0.000962	2.5e-05	0	2.3e-05	4.2e-05	6.9e-05	0.00012	2.4e-05	2.7e-05	4.9e-05	8.5e-05	5.2e-05	4.1e-05	3.6e-05	6.8e-05	4.8e-05	4.6e-05	3e-05
G(79)		0	0	0	1.9e-05	3.7e-05	0	0	0	0	0	7.1e-05	2e-05	7e-06	2.7e-05	1.9e-05	4.6e-05	7.8e-05	0.000202	0.000108	0.00015	2.1e-05	5.4e-05	1.8e-05	5.4e-05
P(123)		0	0	0	1.9e-05	3.7e-05	0	0.000128	7.6e-05	0.000434	0	1.4e-05	7.9e-05	2.8e-05	6.5e-05	5.4e-05	2.2e-05	6.9e-05	2.1e-05	1.5e-05	4.2e-05	6.2e-05	8.4e-05	9.8e-05	5.6e-05
G(126)		0	0	0	0	5.5e-05	0	0	2.5e-05	7.7e-05	2.3e-05	2.8e-05	5.9e-05	7e-06	5.4e-05	5e-05	4.9e-05	3.3e-05	4e-05	4.5e-05	7.6e-05	4e-05	3.8e-05	6.3e-05	0.000107
F(53)		0	0	0	1.9e-05	3.7e-05	0	0	2.5e-05	0	2.3e-05	7.1e-05	2e-05	2.1e-05	2e-05	3.1e-05	7.3e-05	3.3e-05	2.8e-05	1.9e-05	2.6e-05	4.3e-05	8.7e-05	8.8e-05	8.9e-05
N(43)		0	0	0	1.9e-05	1.8e-05	0	0	0	0	0	1.4e-05	4.9e-05	3.5e-05	6.5e-05	3.9e-05	2.4e-05	5e-06	2.8e-05	3.4e-05	7.8e-05	0.000107	7.8e-05	4.8e-05	4.8e-05
G(189)		0	0	0	1.9e-05	5.5e-05	0.000145	3.2e-05	7.6e-05	2.6e-05	0	2.8e-05	2e-05	1.4e-05	2.7e-05	3.9e-05	5.8e-05	5.7e-05	3.4e-05	7.1e-05	2e-05	7.8e-05	3.7e-05	4.8e-05	7.5e-05

## Sheet: Africa
	2019-11-30	2019-12-31	2020-01-31	2020-02-29	2020-03-31	2020-04-30	2020-05-31	2020-06-30	2020-07-31	2020-08-31	2020-09-30	2020-10-31	2020-11-30	2020-12-31	2021-01-31	2021-02-28	2021-03-31	2021-04-30	2021-05-31	2021-06-30	2021-07-31	2021-08-31	2021-09-30	2021-10-31	2021-11-30
I(82)			0.01087	0	0	0.002028	0.002326	0.002813	0.003132	0.010292	0.003021	0.005505	0.001196	0.014111	0.133081	0.173385	0.243943	0.223281	0.463281	0.626327	0.816852	0.939655	0.975937	0.985423	0.617935
D(3)			0	0	0.020478	0.083164	0.002326	0.001406	0.003132	0	0	0	0	0	0.000631	0.002209	0.000418	0.002042	0.002059	0.000849	0.001626	0.001197	0.003239	0.004859	0.360326
A(63)			0	0	0	0	0	0	0	0	0	0	0	0.000941	0.000315	0.003313	0.001253	0.005446	0.001373	0.000849	0.001355	0.000718	0.002776	0.006803	0.373913
Q(19)			0	0	0	0	0.001163	0	0	0	0	0	0	0	0	0.002761	0.000418	0.000681	0.001373	0.001274	0.001355	0.000958	0.002776	0.004859	0.370652
A(2)			0	0	0	0.004057	0.001163	0	0.001044	0.001715	0.003021	0.009174	0.001196	0.004704	0.000946	0.001104	0.002924	0.004765	0.011668	0.01741	0.004606	0.001676	0.001388	0.005831	0.002717
M(109)			0	0	0	0.006085	0	0.002813	0	0.003431	0	0.001835	0.001196	0	0.001261	0.001104	0.001253	0	0.002059	0.010616	0.000813	0.000958	0.001851	0	0.000543
A(85)			0	0	0	0	0	0	0.002088	0.001715	0	0	0	0	0.005992	0.007178	0.002924	0	0.000686	0	0	0.000958	0.001388	0.002915	0.001087
L(87)			0	0	0	0	0	0	0	0.006861	0.009063	0.012844	0.001196	0.001881	0.001261	0.011044	0.000835	0	0.000686	0	0	0.000239	0	0	0.002717
H(155)			0	0	0	0	0	0	0.001044	0	0	0.001835	0.001196	0.009407	0.005046	0.002209	0.002506	0.001361	0.002059	0.000425	0	0.000479	0	0	0.001087
V(70)			0	0	0.003413	0	0.001163	0	0.001044	0.001715	0	0.001835	0.002392	0.001881	0.005676	0.001104	0.001253	0.000681	0.000686	0.000849	0.001626	0.000958	0.000463	0	0.000543
H(148)			0.01087	0	0	0.004057	0.002326	0	0.001044	0	0	0.001835	0.005981	0.009407	0.002523	0.002761	0.000835	0.000681	0	0	0	0.000239	0.000463	0	0
N(121)			0	0	0	0	0	0	0	0	0	0	0	0	0.000315	0.002761	0.005848	0.002042	0.010981	0	0	0	0	0	0
I(48)			0	0	0.010239	0	0	0	0	0	0	0	0	0	0	0.000552	0	0.004765	0.001373	0	0.006502	0.000239	0	0	0
L(29)			0	0	0	0	0	0	0.002088	0	0.003021	0	0	0	0.001577	0.000552	0	0.002042	0	0.001274	0.001626	0.000479	0.002776	0.006803	0.000543
F(28)			0	0	0	0	0	0	0	0	0	0	0	0.002822	0.003784	0.003865	0.003759	0.003404	0	0.000425	0	0	0	0	0
M(84)			0	0	0	0	0	0.001406	0	0	0	0	0	0.001881	0.002208	0.002209	0.001671	0	0.000686	0.000425	0.003522	0.000479	0	0	0
D(209)			0	0	0	0.004057	0.001163	0	0	0	0.003021	0	0.002392	0	0.000946	0.001104	0.002089	0.004765	0.001373	0	0.000813	0.000239	0.000463	0	0.002174
T(30)			0	0	0	0	0	0	0	0	0	0	0	0	0	0.000552	0	0	0	0	0.001897	0.002634	0.004165	0.003887	0.000543
W(75)			0	0	0	0	0	0.021097	0	0.001715	0	0	0	0.000941	0.000946	0.001104	0.001253	0	0.002059	0	0	0	0.000463	0.001944	0
A(188)			0	0	0	0	0.001163	0	0	0	0	0	0	0.011289	0.003154	0.003313	0	0	0	0.000425	0	0	0	0	0
H(125)			0	0	0	0	0.001163	0.001406	0.003132	0	0	0	0	0.001881	0.000315	0.005522	0.001253	0.002042	0.000686	0.000425	0.000813	0.000239	0	0	0
V(23)			0	0	0	0	0	0.002813	0	0	0	0	0	0	0.003469	0.001104	0.000835	0	0	0.000849	0	0.000479	0.000925	0.000972	0
A(69)			0	0	0	0	0	0	0	0	0	0.001835	0.001196	0	0.000631	0.001104	0.002089	0.002042	0.000686	0	0.000271	0.000718	0.000925	0.001944	0
C(86)			0	0	0.006826	0	0	0	0.002088	0.001715	0	0.001835	0	0	0.001577	0.001657	0.000835	0.000681	0.000686	0	0	0.000958	0	0	0
A(98)			0	0	0	0.002028	0	0	0.002088	0	0	0	0	0	0.000631	0.001657	0.001671	0.002042	0.002059	0	0.000271	0.000239	0	0	0.000543
R(158)			0	0	0	0	0	0.001406	0.004175	0	0	0	0	0	0.001261	0.002761	0	0.000681	0	0	0.000813	0.000239	0	0	0
S(136)			0	0	0	0	0	0	0	0	0	0	0	0	0.000631	0.000552	0	0	0	0.000849	0.000271	0.000718	0.002776	0.002915	0
T(175)			0	0	0	0	0	0	0.001044	0	0.003021	0	0.001196	0	0.000946	0.001104	0.001671	0	0.001373	0	0.000271	0.000479	0	0	0
C(33)			0	0	0	0	0	0	0	0	0	0	0	0	0.000946	0.003865	0.000835	0.001361	0.000686	0	0.000271	0.000239	0	0	0
V(66)			0	0	0	0	0	0	0	0	0	0	0	0	0.000315	0.001104	0.000835	0.002042	0.001373	0.001274	0.000271	0.000239	0	0	0
Q(185)			0	0	0	0	0	0	0	0	0	0	0	0	0.000631	0.002761	0.001671	0.000681	0.000686	0	0	0.000479	0	0	0
G(202)			0	0	0	0	0	0.001406	0.001044	0	0	0	0	0	0.000631	0.002761	0.001253	0.000681	0.000686	0	0	0	0	0	0
C(64)			0	0	0	0	0	0	0	0	0	0	0.001196	0	0.000631	0.001657	0.000835	0	0.000686	0.000849	0.000813	0	0	0	0
K(162)			0	0	0	0	0	0	0.001044	0	0	0	0	0	0.002208	0.000552	0	0.000681	0	0	0	0.000479	0	0.000972	0
G(182)			0	0	0	0	0	0	0	0	0	0	0	0	0.000315	0.000552	0	0.004765	0.001373	0	0	0.000239	0	0	0
L(90)			0	0	0	0	0	0	0	0	0	0	0.002392	0.000941	0.000631	0.001104	0.000835	0	0.000686	0	0	0.000479	0	0	0
I(76)			0	0	0	0	0	0	0.001044	0.001715	0	0	0	0	0.000315	0.001657	0.000835	0	0.000686	0.000425	0.000542	0	0	0	0
L(133)			0	0	0	0	0	0	0	0	0	0	0	0	0.000631	0.002761	0.001253	0.000681	0.000686	0	0	0	0	0	0
L(93)			0	0	0	0	0.001163	0	0	0	0	0	0	0	0.000315	0.002209	0.002089	0	0.000686	0	0	0	0	0	0
G(189)			0	0	0	0	0	0	0	0	0	0	0	0	0.000631	0.002761	0.001253	0.000681	0.000686	0	0	0	0	0	0
R(186)			0	0	0	0	0	0	0	0	0	0	0	0	0.000631	0.001657	0.001253	0.000681	0.000686	0	0	0.000239	0	0	0
F(100)			0	0	0	0	0	0	0	0	0	0	0	0	0.000315	0.001657	0.002089	0	0.000686	0	0	0	0.000463	0	0
D(190)			0	0	0	0	0	0	0	0	0	0	0	0	0.000315	0.000552	0	0	0	0	0	0	0.000463	0.006803	0.000543
P(59)			0	0	0	0	0	0	0	0	0	0	0	0	0	0.003313	0.000835	0.000681	0.000686	0	0	0	0	0	0
T(77)			0	0	0	0	0	0	0	0	0	0	0	0	0.000315	0.001104	0.000835	0	0.000686	0	0.001084	0	0	0	0
I(97)			0	0	0	0	0	0	0	0	0	0	0	0	0.000315	0.001104	0.000835	0	0.000686	0	0	0.000718	0	0	0.000543
S(214)			0	0	0	0.002028	0	0	0	0	0	0	0	0	0.000631	0.001657	0.000418	0.000681	0	0	0	0.000479	0	0	0
S(191)			0	0	0	0	0	0	0	0	0	0	0	0	0.000315	0.000552	0.000418	0.003404	0.001373	0	0	0	0	0	0
A(38)			0	0	0	0	0	0	0	0	0	0	0	0.000941	0.000315	0.001104	0.002089	0	0	0	0	0	0	0	0.000543
A(104)			0	0.076923	0	0	0	0	0	0	0	0	0	0	0.000315	0.001104	0.001253	0	0.000686	0.000425	0.000271	0	0	0	0
R(72)			0	0	0	0	0	0	0	0	0	0	0	0.001881	0.000631	0.001104	0.000835	0	0.000686	0	0.000271	0	0	0	0
I(52)			0	0	0	0	0	0	0	0.001715	0	0	0	0	0	0.001104	0	0	0	0.000425	0.000542	0.000718	0	0	0
N(74)			0	0	0	0	0	0.001406	0	0	0	0	0	0	0.000315	0.001104	0.000835	0	0.000686	0	0	0.000479	0	0	0
H(210)			0	0	0	0	0	0	0	0	0	0	0.001196	0	0.000315	0.002209	0.000418	0.000681	0	0	0	0	0	0.000972	0
V(60)			0	0	0	0	0	0	0	0	0	0	0	0	0	0.003313	0	0.000681	0	0	0	0.000479	0	0	0
A(68)			0	0	0	0	0.001163	0	0	0.001715	0	0.001835	0	0	0.000631	0.000552	0.000835	0	0.000686	0	0	0	0	0	0
L(46)			0	0	0	0	0	0	0	0	0	0	0.001196	0.001881	0.000315	0.001104	0	0.000681	0	0	0.000271	0	0	0.000972	0
N(41)			0	0	0	0	0	0	0	0	0	0	0	0	0.000315	0.001104	0	0.002723	0.001373	0	0	0	0	0	0
G(78)			0	0	0	0.002028	0	0	0	0	0	0	0	0	0.000631	0.000552	0.000835	0	0.000686	0	0.000271	0	0.000463	0	0
K(180)			0	0	0	0	0	0	0	0	0	0	0	0	0.000631	0.000552	0	0	0.002059	0.000425	0	0.000239	0	0	0
I(73)			0	0	0	0	0	0	0	0	0	0	0	0.000941	0.000631	0.001104	0.000835	0	0.000686	0	0	0	0	0	0
S(94)			0	0	0	0	0	0	0	0	0	0	0	0	0.000315	0.001104	0.000835	0	0.000686	0.000425	0	0	0.000463	0	0
I(80)			0	0	0	0	0	0.001406	0	0	0	0	0	0	0	0.002761	0	0	0.001373	0	0	0	0	0	0
V(10)			0	0	0	0	0	0	0	0	0	0	0	0	0.000315	0.000552	0	0	0	0	0	0	0.001851	0	0.001087
R(101)			0	0	0	0	0	0	0	0	0	0	0	0	0.000315	0.001104	0.000835	0	0.000686	0	0	0	0.000463	0	0
E(135)			0	0	0	0	0	0	0	0	0	0	0	0	0.000315	0.000552	0	0	0	0.000425	0.001084	0	0	0	0
L(17)			0	0	0	0	0	0	0.001044	0	0	0	0	0	0	0.000552	0.000835	0	0	0	0	0.000239	0.000463	0	0.000543
F(112)			0	0	0	0	0	0	0	0	0	0	0	0	0.000315	0.001104	0.000835	0	0.001373	0	0	0	0	0	0
F(103)			0	0.076923	0	0	0	0	0	0	0	0	0	0	0.000315	0.001104	0.000835	0	0.000686	0	0	0	0	0	0
R(107)			0	0	0	0	0	0	0	0	0	0	0	0	0.000315	0.001104	0.000835	0	0.000686	0	0	0	0.000463	0	0
F(65)			0	0	0	0	0	0	0	0	0	0	0	0	0.000315	0.001657	0.000835	0	0.000686	0	0	0	0	0	0
W(92)			0	0	0	0	0	0	0	0	0	0	0	0	0.000315	0.001104	0.000835	0	0.000686	0	0	0	0	0	0.000543
M(91)			0	0	0	0	0	0	0	0	0	0	0	0	0.000315	0.001104	0.000835	0	0.000686	0	0	0.000239	0	0	0
N(207)			0	0	0	0	0	0	0.001044	0	0	0	0	0	0.000315	0.000552	0	0	0	0	0.000542	0.000239	0	0.000972	0
Y(71)			0	0	0	0	0	0	0	0	0	0	0	0	0.000315	0.001104	0.000835	0	0.000686	0	0	0.000239	0	0	0
I(201)			0	0	0	0	0	0	0	0	0	0	0	0	0.000315	0.002209	0.000418	0.000681	0	0	0	0	0	0	0
S(173)			0	0	0	0	0	0	0	0	0	0	0	0	0.000315	0.000552	0	0	0	0	0	0.000239	0.000925	0	0.001087
Y(95)			0	0	0	0	0	0	0	0	0	0	0	0	0.000315	0.001104	0.000835	0	0.000686	0	0	0	0	0	0
S(108)			0	0	0	0	0	0	0	0	0	0	0	0	0.000315	0.001104	0.000835	0	0.000686	0	0	0	0	0	0
P(114)			0	0	0	0	0	0	0	0	0	0	0	0	0.000315	0.001104	0.000835	0	0.000686	0	0	0	0	0	0
N(113)			0	0	0	0	0	0	0	0	0	0	0	0	0.000315	0.001104	0.000835	0	0.000686	0	0	0	0	0	0
L(67)			0	0	0	0	0	0	0	0	0	0	0	0	0.000315	0.001104	0.000835	0	0.000686	0	0	0	0	0	0
W(110)			0	0	0	0	0	0	0	0	0	0	0	0	0.000315	0.001104	0.000835	0	0.000686	0	0	0	0	0	0
K(15)			0	0	0	0	0	0	0	0	0	0.001835	0	0.000941	0	0.000552	0.000418	0	0.000686	0	0	0	0.000463	0	0
T(106)			0	0	0	0	0	0	0	0	0	0	0	0	0.000315	0.001104	0.000835	0	0.000686	0	0	0	0	0	0
G(79)			0	0	0	0	0	0	0	0	0	0	0	0	0.000315	0.001104	0.000835	0	0.000686	0	0	0	0	0	0
F(96)			0	0	0	0	0	0	0	0	0	0	0	0	0.000315	0.001104	0.000835	0	0.000686	0	0	0	0	0	0
A(81)			0	0	0	0	0	0	0	0	0	0.001835	0	0	0	0.000552	0	0.000681	0	0	0.000271	0.000239	0	0	0.000543
A(83)			0	0	0	0	0	0	0	0	0	0	0.001196	0	0	0.001657	0	0	0	0.000425	0	0	0	0	0.000543
L(102)			0	0	0	0	0	0	0	0	0	0	0	0	0.000315	0.001104	0.000835	0	0.000686	0	0	0	0	0	0
V(88)			0	0	0	0	0	0	0	0	0	0	0	0	0.000315	0.001104	0.000835	0	0.000686	0	0	0	0	0	0
G(89)			0	0	0	0	0	0	0	0	0	0	0	0	0.000315	0.001104	0.000835	0	0.000686	0	0	0	0	0	0
S(99)			0	0	0	0	0	0	0	0	0	0	0	0	0.000315	0.001104	0.000835	0	0.000686	0	0	0	0	0	0
S(111)			0	0	0	0	0	0	0	0	0	0	0	0	0.000315	0.001104	0.000835	0	0.000686	0	0	0	0	0	0
E(115)			0	0	0	0	0	0	0	0	0	0	0	0	0.000315	0.001104	0.000835	0	0.000686	0	0	0	0	0	0
I(128)			0	0	0	0	0	0	0	0	0	0	0.001196	0	0.000315	0.000552	0	0.002042	0	0	0	0	0	0	0
T(208)			0	0	0	0	0	0	0	0	0	0	0	0	0.000631	0.000552	0.000835	0	0.000686	0	0	0	0	0	0
A(142)			0	0	0	0	0	0	0.001044	0	0	0	0.001196	0.000941	0.000315	0.000552	0	0	0	0	0	0.000239	0	0	0
R(146)			0	0	0	0	0	0	0.001044	0	0	0.001835	0	0	0.000631	0.000552	0	0	0	0	0	0	0	0.000972	0
A(194)			0	0	0	0	0	0	0	0	0	0	0.001196	0	0.000315	0.000552	0	0	0	0	0.000271	0.000239	0	0	0.000543

## Sheet: Asia
	2019-11-30	2019-12-31	2020-01-31	2020-02-29	2020-03-31	2020-04-30	2020-05-31	2020-06-30	2020-07-31	2020-08-31	2020-09-30	2020-10-31	2020-11-30	2020-12-31	2021-01-31	2021-02-28	2021-03-31	2021-04-30	2021-05-31	2021-06-30	2021-07-31	2021-08-31	2021-09-30	2021-10-31	2021-11-30
I(82)			0	0	0.001561	0	0.000347	0.001087	0.001204	0.000187	0.002596	0.002927	0.008964	0.002625	0.118006	0.036383	0.131936	0.312734	0.376853	0.555347	0.740043	0.884895	0.990834	0.990858	0.904897
F(28)			0	0.006969	0	0	0	0	0	0	0	0.000325	0.000538	0.002716	0.030307	0.043508	0.13641	0.104894	0.036359	0.00455	0.000278	0.000163	4.9e-05	5.7e-05	3.2e-05
D(3)			0	0.001742	0.01249	0.004585	0.001386	0.001449	0.001445	0.001867	0.000742	0.000325	0.000359	0	0.000784	0.000758	0.000438	0.001403	0.000626	0.000414	0.00047	0.000318	0.000489	0.000686	0.066843
Q(19)			0	0	0	0	0	0	0	0	0	0	0	0	0.000479	7.6e-05	4.9e-05	8.6e-05	2.8e-05	7.5e-05	6.4e-05	5.7e-05	9.8e-05	5.7e-05	0.073618
A(63)			0	0	0	0.001196	0	0.001087	0.000722	0	0	0.000325	0	0.000815	0.000697	0.000227	4.9e-05	8.6e-05	0.000256	0.000113	0.000107	8.1e-05	0.00022	0.000114	0.070746
A(2)			0.004614	0	0.001561	0.002592	0.004158	0.002174	0.000722	0.000187	0.000371	0.002276	0.001793	0.005703	0.003875	0.007352	0.001653	0.001718	0.002048	0.001542	0.002158	0.001279	0.006942	0.0028	0.003097
V(70)			0.005767	0	0.01171	0.059011	0.034304	0.002536	0.001204	0.002801	0.002967	0.000976	0.002151	0.005793	0.001524	0.001592	0.001119	0.001002	0.000654	0.001053	0.000577	0.001254	0.000929	0.000743	0.001355
L(34)			0	0	0	0	0.000693	0.000725	0	0.000187	0	0	0	0.000362	0.001742	0.000227	0.000389	0.000401	0.000285	0.000414	0.00265	0.00483	0.001931	0.000286	3.2e-05
T(30)			0	0	0	0	0.000693	0	0	0	0	0	0	0	0.001002	7.6e-05	0.000195	0.000315	0.000341	0.000263	0.000235	0.003111	0.00264	0.001828	0.001452
D(209)			0.009227	0.010453	0	0	0.000693	0	0.000482	0.001307	0.001113	0.003577	0.000896	0.00172	0.000566	0.001137	0.001362	0.000888	0.001223	0.001015	0.000812	0.001295	0.001467	0.000743	0.001226
H(125)			0.002307	0.001742	0	0.00319	0.004505	0.002536	0.000241	0.002801	0.002226	0.000976	0.002331	0.00181	0.00074	0.001137	0.000973	0.001002	0.001508	0.001955	0.001517	0.000619	0.00088	0.000743	0.001226
H(155)			0	0	0	0	0	0	0.000241	0	0.000371	0	0.001613	0.000996	0.000697	0.001516	0.00141	0.002892	0.00441	0.001993	0.000962	0.000277	0.000733	0.000343	0.000258
M(109)			0	0	0.00039	0.000199	0	0	0	0.001867	0.000742	0	0.000538	0.000453	0.000784	0.000531	0.000243	0.000372	0.00037	0.00109	0.002885	0.001694	0.000978	0.000229	0.000774
A(69)			0.001153	0	0	0.000199	0.000693	0.001087	0	0.000373	0.000371	0.001626	0.000359	0.000272	0.001829	0.001668	0.000924	0.000716	0.00074	0.000714	0.001068	0.00066	0.001638	0.002514	0.002161
V(23)			0.001153	0	0.00039	0.000399	0	0.000362	0.000963	0.001307	0.000371	0	0.000359	0.000724	0.000479	0.000227	0.000681	0.001432	0.003215	0.003422	0.000726	0.00013	0.00022	0.000571	0.00029
L(29)			0	0	0	0	0.004851	0.003986	0	0	0.000371	0.000976	0.000896	0.001901	0.001655	0.000379	0.000632	0.000573	0.000484	0.000414	0.000278	0.000399	0.000904	0.000857	0.001387
A(81)			0	0	0.00039	0.001396	0	0	0	0	0	0.000325	0.000179	0.000996	0.000784	0.001289	0.000486	0.001919	0.001309	0.000263	0.000128	0.000106	0.000489	0.000971	0.001936
V(66)			0.001153	0	0.000781	0	0	0.000362	0.019986	0.008775	0	0	0.000359	0.001448	0.000914	0.000303	0.000486	8.6e-05	0.000114	0.000414	0.000235	0.000464	0.000244	5.7e-05	0.000516
T(208)			0	0	0	0.000199	0	0	0	0	0	0	0.000359	9.1e-05	0.000261	0.000834	0.000243	0.00043	0.00037	0.000263	0.000556	0.001148	0.000856	0.0004	0.000387
M(84)			0	0	0	0	0.000347	0	0.000241	0	0.000371	0	0.001613	0.004617	0.003396	0.001364	0.000486	0.000372	0.000228	0.000451	0.000192	9.8e-05	0.000464	0.000971	0.000226
I(76)			0	0	0	0.000199	0.00104	0.000362	0	0	0	0	0.000179	0.000996	0.003745	0.001895	0.000486	0.00043	0.000285	0.00015	0.000107	0.000106	0.000318	0.001143	0.000419
H(148)			0.00346	0	0.001171	0.02193	0.011088	0.000362	0	0.000373	0.001113	0	0.000179	0.000272	0.000174	7.6e-05	0.000195	0.0002	0.00037	0.00015	2.1e-05	8.1e-05	4.9e-05	0.000114	0.000129
A(85)			0.001153	0	0	0.000199	0.000347	0	0.000241	0	0	0.00065	0.000359	0.000453	0.000653	0.000379	0.000681	0.00063	0.000626	0.000639	0.000342	0.000342	0.000562	0.000571	0.000355
S(4)			0.001153	0	0	0	0	0.001087	0	0.00056	0	0	0	0.000905	0.000348	7.6e-05	0.00034	0.000115	0.000654	0.000827	0.000171	0.000285	0.000684	0.000914	0.001097
T(7)			0	0	0	0	0.000347	0.000362	0.000241	0.000934	0.000371	0.000325	0	0.000272	8.7e-05	0.000303	0	0.001145	0.001423	0.000376	0.000342	0.000187	7.3e-05	5.7e-05	0.000161
R(146)			0	0	0	0	0	0	0	0.000187	0	0	0	0	0.000218	7.6e-05	9.7e-05	0.000143	8.5e-05	0.000376	4.3e-05	0.000872	0.000196	0.000286	9.7e-05
K(15)			0	0	0	0	0	0	0	0	0	0	0.000179	0.000362	0.000218	0.000455	0.000632	0.000315	0.00037	0.000978	0.000406	0.000106	0.000122	0.000857	0.000452
G(78)			0.001153	0	0	0	0.000347	0	0	0	0.000371	0.000976	0.000538	0.000543	8.7e-05	0.000227	0.000632	0.001174	0.000285	0.000226	0.000171	0.000187	0.000416	0.000229	6.5e-05
T(175)			0	0	0.0121	0.002592	0	0.000362	0	0	0	0	0.000359	0.000272	0.000218	0.000152	0.000146	0.0002	0.000114	0.00015	0.000128	0.00031	0.000391	5.7e-05	0.000194
I(201)			0	0	0	0	0	0	0.000241	0	0	0.00065	0	9.1e-05	0.000261	0.000379	9.7e-05	2.9e-05	2.8e-05	0.000113	0	4.1e-05	0.000342	0.001885	0.002194
R(107)			0	0	0	0	0	0.000362	0.000241	0.000187	0	0.000325	0	0.000272	0.000131	7.6e-05	0.000146	0.000458	0.00037	0.000451	0.000107	0.000285	0.000293	0.000514	0.000581
L(17)			0	0	0	0	0	0	0.000482	0.000747	0.000742	0	0.000179	0.001177	0.000305	0.000758	0.000243	0.000802	0.000199	0.000113	0.000192	0.000138	0.000244	0.000343	0.000194
I(73)			0	0	0	0	0	0	0	0	0.000371	0.002276	0.001613	0.001267	0.001785	0.001668	0.00034	8.6e-05	5.7e-05	7.5e-05	8.5e-05	6.5e-05	4.9e-05	5.7e-05	9.7e-05
A(40)			0.001153	0	0.00039	0	0	0.000362	0	0	0.001113	0.000325	0	0	0	0	4.9e-05	0.000172	5.7e-05	0.000226	0.000128	0.000106	0.000196	0.000743	0.002032
C(33)			0	0	0	0	0	0.000725	0	0	0	0.00065	0	0.000543	0.000174	7.6e-05	0.000146	0.0002	0.000199	0.000301	0.000128	9.8e-05	0.000391	0.000457	0.001
S(94)			0	0	0	0	0	0.000362	0.000241	0.000187	0.000742	0	0.000179	0.000181	0.000131	0.000227	0.000146	0.000143	5.7e-05	7.5e-05	8.5e-05	7.3e-05	0.000147	0.001257	0.001452
V(10)			0	0	0.001952	0	0	0.000725	0.000241	0.000187	0	0	0.000179	0.000815	0.000261	0.000379	0.000195	0.000115	0.000171	0.000263	0.000192	0.000187	0.000196	0.0004	0.000419
C(86)			0	0	0	0.001994	0.000693	0.000362	0.000241	0	0.000371	0	0.000538	0.000181	0.000131	0.000152	0.000146	0.000115	0.000199	7.5e-05	0.000235	0.000244	0.000196	0.000286	0.000194
R(158)			0	0	0	0	0	0	0	0	0	0.000325	0.000179	0	0.000131	0.000152	4.9e-05	0.000172	0.000541	0.000677	0.000192	0.000163	0.000244	0.000229	0.000194
Q(185)			0	0	0	0.000399	0	0	0	0	0	0	0	0	0	0	4.9e-05	0.0002	0.000313	0.000338	0.000256	0.00013	0.000293	0.000457	0.00071
K(162)			0	0	0	0.000598	0	0	0	0.000187	0.000371	0	0.000538	9.1e-05	0.000261	0.000531	9.7e-05	0.000172	0.00037	0.00015	0.000128	7.3e-05	0.00044	0.000571	9.7e-05
I(52)			0	0	0	0	0	0.000725	0.001204	0.000934	0	0	0.000179	0	0.000348	0.000758	0.001216	5.7e-05	5.7e-05	0.000113	0.000107	6.5e-05	7.3e-05	0.000343	0.000226
S(214)			0	0	0	0.000199	0.000347	0.004348	0.000963	0	0	0	0.000179	9.1e-05	0.000261	0.000303	0.000243	0.000229	0.000171	0.000263	0.000299	4.9e-05	0.000122	0.000171	0.000258
A(98)			0	0	0	0.000199	0.000347	0	0.000241	0	0	0.000976	0	0	0.000305	0.000758	0.000195	5.7e-05	0.000228	0.000226	2.1e-05	9.8e-05	0.000464	0.000514	0.000161
A(104)			0.00346	0	0	0.000997	0.005891	0	0	0	0.000371	0	0	0.000181	0.000261	0	0.000195	8.6e-05	0.000285	0.000226	0.000192	5.7e-05	7.3e-05	0.000171	0.000258
C(64)			0.001153	0	0.003123	0	0	0.000362	0.000963	0.00056	0	0.00065	0.000179	0.000181	4.4e-05	0.000152	4.9e-05	0.000115	0.000114	0.000301	8.5e-05	7.3e-05	0.000318	0	0.000548
T(127)			0	0	0	0	0	0	0	0	0	0	0.000179	0	0.000174	7.6e-05	0	0.000172	0.00037	0	0.000876	9.8e-05	7.3e-05	0	6.5e-05
G(79)			0	0	0	0.000399	0	0	0	0	0	0	0	0	4.4e-05	0	4.9e-05	8.6e-05	2.8e-05	0.000489	0.001303	0	2.4e-05	0	0
G(6)			0	0	0	0.000199	0	0	0	0	0.000742	0	0	0.000181	0.000479	0.000303	0.000195	2.9e-05	8.5e-05	0.000263	0.000107	0.000155	0.000342	0.000114	0.000258
I(128)			0	0	0	0	0	0	0.001926	0.00168	0	0	0	9.1e-05	4.4e-05	0	0	5.7e-05	0	7.5e-05	2.1e-05	7.3e-05	0.000171	0.001371	0.000581
L(46)			0.001153	0	0.001952	0.000399	0	0.000362	0	0	0	0	0	0.000272	0.000218	0.000227	0.000146	8.6e-05	5.7e-05	0.000226	0.000128	0.000163	0.000122	0.000171	0.000419
L(124)			0	0	0	0	0	0	0	0	0	0	0	0	8.7e-05	0.000303	0.000195	0.000401	8.5e-05	7.5e-05	0.000256	0.000147	0.000342	0.000114	0.000161
S(136)			0	0	0	0	0.000693	0	0.000482	0	0	0.000325	0.000538	0.000181	0.000348	7.6e-05	0	8.6e-05	0.000114	7.5e-05	0.00015	6.5e-05	0.00022	0.000743	0.000323
T(77)			0	0	0	0	0	0.000362	0	0.004294	0.004451	0.000325	0.001793	0.000272	0	7.6e-05	0.000195	5.7e-05	5.7e-05	0.000226	6.4e-05	1.6e-05	4.9e-05	0	9.7e-05
M(1)			0	0.003484	0	0	0	0	0	0	0	0	0	0	0	0	0	0	0	0	2.1e-05	0	0.000587	0.001428	0.00071
W(75)			0	0	0	0.000199	0.000347	0	0	0.000187	0.000371	0.000325	0	0.000543	0.000348	0.000455	0.000195	0.0002	0.000171	0.000188	0.00015	4.1e-05	0.000196	5.7e-05	3.2e-05
E(167)			0	0	0.001561	0.000199	0	0	0	0.000187	0	0	0	0	8.7e-05	0	0	2.9e-05	0.000114	3.8e-05	0.000107	0.000155	0.000611	0.000114	6.5e-05
I(97)			0	0	0	0	0.000693	0	0.000722	0.002987	0.001113	0.001626	0	9.1e-05	0.000174	0.000303	0	8.6e-05	8.5e-05	0	6.4e-05	6.5e-05	4.9e-05	0.000114	0.000258
N(43)			0	0	0	0	0	0	0	0	0	0	0	0.000181	0.000131	0	0	0	0	0.000338	0.00062	0.000106	0.000122	0	9.7e-05
A(68)			0	0	0	0.000199	0	0	0	0	0	0	0.000359	0.000272	0.000435	0.000152	9.7e-05	5.7e-05	2.8e-05	3.8e-05	0.000128	0.000204	0.000122	5.7e-05	9.7e-05
A(142)			0	0	0	0.000199	0.000347	0.000725	0	0.000187	0.000371	0	0.000538	0.000815	0	7.6e-05	9.7e-05	0.000172	0.000199	0.000188	0.000128	0.000114	0	0	9.7e-05
S(212)			0	0	0	0	0	0	0	0.000373	0	0.000325	0.001255	0.001448	0	0	0	0.000258	0	7.5e-05	4.3e-05	3.3e-05	0.000122	0.000229	0.000161
A(83)			0	0	0	0	0	0.000725	0	0	0.000371	0	0.000179	9.1e-05	0.000218	0.000303	4.9e-05	0.000115	5.7e-05	0.000113	6.4e-05	8e-06	0.000513	0.000171	0.000161
K(166)			0	0	0.001561	0.000199	0	0	0	0.000187	0.000371	0.000325	0.000359	0.000634	0.000914	0.000152	4.9e-05	8.6e-05	0	3.8e-05	0	4.1e-05	0.000122	0	0
A(188)			0	0	0	0	0.000347	0	0	0	0.000371	0	0	9.1e-05	4.4e-05	0.000152	0.000195	2.9e-05	0.000114	0	0.000107	6.5e-05	0.000122	0.000686	0.000323
A(38)			0	0	0	0	0	0	0.000482	0	0.000371	0	0	0.000181	0.000131	0	0	0.000544	0.000228	0.00015	4.3e-05	6.5e-05	7.3e-05	0.000114	0
I(168)			0	0	0.001561	0.000199	0	0	0	0.000187	0	0	0	9.1e-05	4.4e-05	0.000152	0	2.9e-05	8.5e-05	7.5e-05	0.00015	0.000179	7.3e-05	0.000171	3.2e-05
V(60)			0	0	0	0	0	0	0	0	0	0	0	0.000543	0.000479	0.000606	0.000146	0	8.5e-05	0.000113	0.000128	2.4e-05	2.4e-05	0	9.7e-05
L(87)			0	0	0	0	0	0	0	0.000187	0	0	0.000179	0.000362	0.000131	0.000227	9.7e-05	2.9e-05	0.000142	0.000188	6.4e-05	1.6e-05	2.4e-05	0.000229	0.00029
F(100)			0	0	0	0	0	0	0	0	0	0	0.000359	0	0.000218	7.6e-05	0.000438	0.000344	0	0.000113	0	0	0.000171	5.7e-05	0.000129
D(160)			0.001153	0	0	0	0	0	0	0	0.000371	0	0	0	0.000305	7.6e-05	4.9e-05	0.000143	0.000199	0	0	9.8e-05	2.4e-05	0.000171	9.7e-05
M(91)			0	0	0	0	0	0	0	0	0	0	0.000179	9.1e-05	0	7.6e-05	0	0.000172	0	3.8e-05	4.3e-05	0.000106	7.3e-05	5.7e-05	0.000387
E(12)			0	0	0	0	0	0	0	0	0	0	0	9.1e-05	0.000523	0.000379	0	0.000172	0	0	0	5.7e-05	4.9e-05	0.000114	0.000129
S(197)			0	0	0	0	0	0	0	0	0.000742	0.000325	0	0	4.4e-05	0	4.9e-05	0.000115	8.5e-05	7.5e-05	6.4e-05	4.9e-05	4.9e-05	0.000171	0.000194
G(89)			0	0	0	0	0	0	0	0	0	0	0	0	0.000131	0	9.7e-05	2.9e-05	5.7e-05	0.000226	4.3e-05	4.1e-05	2.4e-05	0.000171	0.000258
W(55)			0	0	0	0	0	0	0.001204	0	0	0	0.000179	0.000362	0	0.000303	9.7e-05	0	0.000142	7.5e-05	0.000107	3.3e-05	0	0	0
W(31)			0.001153	0	0	0	0	0	0	0.000187	0.000371	0	0	0	0.000174	0	4.9e-05	8.6e-05	0	7.5e-05	0.000278	2.4e-05	7.3e-05	0	0
I(151)			0	0	0	0	0	0	0	0	0	0	0	9.1e-05	4.4e-05	0	0	5.7e-05	0	0	0	1.6e-05	0.000244	0.000628	0.000161
I(48)			0	0.001742	0	0	0	0	0	0	0	0	0	0	8.7e-05	0	0	2.9e-05	2.8e-05	0.000301	8.5e-05	2.4e-05	9.8e-05	0.000114	9.7e-05
I(144)			0	0	0	0	0	0	0	0	0	0	0	0.000272	0.000174	0.000303	9.7e-05	2.9e-05	5.7e-05	0	2.1e-05	3.3e-05	7.3e-05	0	0.000161
E(11)			0	0	0	0	0.000347	0	0	0.000187	0	0	0.000359	0.000181	4.4e-05	0	4.9e-05	2.9e-05	5.7e-05	0.000113	0	2.4e-05	7.3e-05	5.7e-05	0.000161
R(44)			0	0	0	0	0	0	0	0	0	0	0	0.000181	0	7.6e-05	4.9e-05	2.9e-05	0.000142	3.8e-05	2.1e-05	4.9e-05	4.9e-05	0.000114	0.000129
V(88)			0	0	0	0	0	0	0	0	0	0	0	0	0	7.6e-05	0.000389	0.0002	8.5e-05	3.8e-05	2.1e-05	8e-06	2.4e-05	0	6.5e-05
L(93)			0	0	0	0	0	0	0	0.000187	0	0	0	0	0	0	4.9e-05	0	0.000114	3.8e-05	0	9e-05	7.3e-05	0.000114	3.2e-05
P(132)			0	0	0	0	0	0	0	0	0	0	0	0	8.7e-05	0	0	2.9e-05	5.7e-05	0.000188	0	7.3e-05	9.8e-05	5.7e-05	0
P(123)			0	0	0	0	0	0.000725	0	0	0	0	0	0	8.7e-05	0	9.7e-05	0.000229	2.8e-05	0	4.3e-05	3.3e-05	0	5.7e-05	3.2e-05
R(105)			0	0	0	0	0	0	0	0	0	0	0	0	0	0	0	0	0	0	0.000235	1.6e-05	0	0.000457	6.5e-05
I(24)			0	0	0	0.000199	0	0	0	0	0	0.000325	0.000179	9.1e-05	4.4e-05	0.000227	4.9e-05	2.9e-05	2.8e-05	0	0	2.4e-05	0.000122	0.000114	3.2e-05
I(80)			0	0	0	0	0	0	0	0.000187	0	0	0.000179	0	0	0	0.000292	2.9e-05	5.7e-05	0.000113	4.3e-05	8e-06	4.9e-05	0	9.7e-05
H(210)			0.001153	0	0	0	0	0	0.000241	0	0	0	0	0	0	7.6e-05	9.7e-05	0	5.7e-05	0	4.3e-05	6.5e-05	4.9e-05	5.7e-05	3.2e-05
D(190)			0	0	0	0	0	0	0	0	0	0	0	0	0	0	9.7e-05	2.9e-05	2.8e-05	7.5e-05	4.3e-05	4.1e-05	0	0	0.000258
I(49)			0	0	0	0	0	0	0	0	0	0	0	0	0.000174	7.6e-05	0	0	8.5e-05	0.00015	0	1.6e-05	0.000171	0	0
S(173)			0	0	0	0	0.000347	0	0.000241	0	0	0.000325	0	9.1e-05	0.000131	0	4.9e-05	2.9e-05	5.7e-05	0	4.3e-05	3.3e-05	0	0	0.000129
R(174)			0	0	0	0	0	0	0	0	0	0	0	0	8.7e-05	0	0	0.000115	2.8e-05	7.5e-05	0.000107	2.4e-05	7.3e-05	0	0
R(186)			0	0	0	0.000399	0	0	0	0	0	0	0	0	4.4e-05	0.000152	4.9e-05	5.7e-05	2.8e-05	7.5e-05	2.1e-05	8e-06	0.000122	5.7e-05	0
D(215)			0	0	0	0	0	0	0	0	0	0.000325	0	0	0	7.6e-05	0	2.9e-05	8.5e-05	3.8e-05	6.4e-05	2.4e-05	7.3e-05	0	6.5e-05
I(161)			0	0	0	0	0	0	0	0.000187	0	0	0	0	0.000131	0	9.7e-05	0	0	3.8e-05	4.3e-05	2.4e-05	9.8e-05	5.7e-05	3.2e-05
L(90)			0	0	0	0	0	0	0.000241	0	0	0	0	0	4.4e-05	0	4.9e-05	0.000143	0	3.8e-05	2.1e-05	4.9e-05	0	0	3.2e-05
I(8)			0	0	0.00039	0	0	0	0	0	0.000371	0	0.000179	0	4.4e-05	7.6e-05	4.9e-05	0	2.8e-05	7.5e-05	2.1e-05	1.6e-05	7.3e-05	5.7e-05	3.2e-05
G(126)			0	0	0	0	0	0	0	0	0	0	0	0	0.000174	0	0	5.7e-05	8.5e-05	3.8e-05	2.1e-05	1.6e-05	0	0	9.7e-05

## Sheet: Europe
	2019-11-30	2019-12-31	2020-01-31	2020-02-29	2020-03-31	2020-04-30	2020-05-31	2020-06-30	2020-07-31	2020-08-31	2020-09-30	2020-10-31	2020-11-30	2020-12-31	2021-01-31	2021-02-28	2021-03-31	2021-04-30	2021-05-31	2021-06-30	2021-07-31	2021-08-31	2021-09-30	2021-10-31	2021-11-30
I(82)			0.000255	0	3.6e-05	0	0	0	0	0.000233	4.2e-05	0.000255	0.000314	0.000827	0.15396	0.006437	0.01146	0.026268	0.182129	0.708449	0.945407	0.99464	0.999038	0.998926	0.953571
D(3)			0.005346	0.041353	0.018112	0.014312	0.00891	0.0019	0.000762	0.000311	0.000296	0.000348	0.005684	0.004092	0.002903	0.000728	0.000364	0.000384	0.000396	0.000429	0.000226	0.000346	0.000508	0.000363	0.045989
A(63)			0.000255	0	0.000144	0.000124	0	0.0001	0	0.000388	4.2e-05	0.000116	0.000111	4.3e-05	0.001743	0.000144	0.000307	0.000488	0.000971	0.000879	0.001197	0.001019	0.000526	0.000472	0.046392
Q(19)			0	0	3.6e-05	8.2e-05	0	0.0006	0	0	0	4.6e-05	1.8e-05	2.9e-05	0.00136	6.6e-05	5.6e-05	6.6e-05	7.2e-05	3.4e-05	1.7e-05	7.6e-05	0.00034	0.000137	0.045945
A(2)			0.000509	0	0.001624	0.001196	0.000387	0.0023	0.011433	0.005827	0.00622	0.004545	0.0031	0.00623	0.007906	0.00931	0.009356	0.009211	0.007582	0.004541	0.002305	0.002253	0.003689	0.005389	0.008249
V(70)			0.004328	0	0.000433	0.000206	0.000129	0.0002	0.000381	0.000544	0.000212	0.000371	0.001255	0.003194	0.006528	0.012945	0.01262	0.010632	0.007762	0.002622	0.001209	0.001138	0.00073	0.000435	0.000884
H(125)			0.004328	0.00188	0.000289	0.000784	0.001679	0.0014	0.003239	0.0188	0.005627	0.002203	0.003045	0.001811	0.002945	0.002342	0.001649	0.001953	0.002991	0.001348	0.000665	0.001046	0.001535	0.001057	0.001168
F(28)			0	0	0	0	0.000129	0.0001	0	0.000155	0	4.6e-05	1.8e-05	0.000955	0.001573	0.003268	0.004436	0.005925	0.006414	0.002354	0.00077	7.6e-05	7e-06	5.8e-05	1.5e-05
S(94)			0.000255	0	7.2e-05	0.000124	0.000129	0.0002	0.000191	7.8e-05	0.000338	0.000209	1.8e-05	0.000271	0.000152	0.000269	0.00032	0.00028	0.000192	0.004064	0.001113	0.001102	0.001689	0.002597	0.002853
A(81)			0	0	3.6e-05	4.1e-05	0	0	0	0	0.000127	4.6e-05	0.000258	0.000114	0.000619	0.00023	0.000312	0.000384	0.000276	0.000785	0.002481	0.001949	0.001707	0.002326	0.001638
S(212)			0	0	0	0	0.000775	0.0005	0.000572	0	8.5e-05	0.000116	5.5e-05	8.6e-05	0.00082	0.000958	0.000247	0.000115	0.000126	0.000248	0.001966	0.001827	0.00112	0.002015	0.001635
A(69)			0.001018	0	0.000289	0.00033	0.000258	0.0002	0.004002	0.000855	0.000254	0.000904	0.000738	0.000456	0.000832	0.000531	0.000385	0.000603	0.000647	0.000624	0.000853	0.001408	0.001352	0.001375	0.001663
V(23)			0.000255	0	7.2e-05	0.000454	0.000517	0.0011	0.000953	0.000155	0.000254	0.000185	0.000258	0.000299	0.000462	0.000472	0.000952	0.001421	0.000959	0.000966	0.001297	0.001923	0.001624	0.001283	0.000625
D(209)			0.000764	0	0.000361	0.000289	0.001033	0.0007	0.002287	0.000155	0.002877	0.003594	0.003193	0.000813	0.00051	0.000945	0.000939	0.00085	0.000641	0.000563	0.000799	0.001138	0.001463	0.00131	0.000792
A(98)			0	0	3.6e-05	8.2e-05	0	0	0	0.000466	8.5e-05	4.6e-05	0.000185	0.000528	0.000213	0.000407	0.000307	0.000395	0.00033	0.000215	0.001485	0.002896	0.002047	0.000783	0.000381
M(109)			0	0	0.00018	0.00033	0.000517	0.0004	0.000191	0.000311	0.000212	0.000487	0.000609	0.000442	0.000474	0.00063	0.00077	0.000708	0.000384	0.00053	0.000527	0.000607	0.000973	0.001026	0.001038
T(175)			0.005855	0.022556	0.031894	0.011384	0.00439	0.004001	0.000953	7.8e-05	0.00055	0.000417	0.000461	0.000314	0.000249	0.000197	0.000117	0.000165	0.000168	0.000101	0.000167	0.000333	0.000354	0.000243	0.000261
A(104)			0.000764	0	3.6e-05	4.1e-05	0	0.0002	0	0.000155	4.2e-05	0.000116	0.000129	0.000228	0.000304	0.000997	0.001597	0.002886	0.003309	0.001013	2.9e-05	4e-05	3.6e-05	5.1e-05	5.7e-05
L(17)			0.001782	0	0.000108	0.000412	0.000258	0.0019	0.008765	0.006293	0.005204	0.006562	0.002399	0.00047	0.000431	0.000459	0.000355	0.000483	0.000468	0.000302	0.000335	0.000745	0.000379	0.000236	0.000209
L(34)			0.000255	0	0.00018	0.000742	0.000129	0.0001	0	7.8e-05	0.000423	0.000162	0.000424	0.000684	0.000668	0.000787	0.001394	0.000878	0.000719	0.001241	0.000636	0.000458	0.000383	0.000318	0.000246
H(155)			0.001018	0	7.2e-05	0.000206	0.000517	0.0008	0.000572	0.000777	0.000296	0.001183	0.001292	0.001169	0.000729	0.001142	0.000658	0.000587	0.000827	0.000436	0.00069	0.000538	0.000343	0.000281	0.000379
L(29)			0	0	0.000144	0.000247	0.000517	0.0003	0	0.000233	0.000338	0.000255	0.000295	0.000342	0.000328	0.00042	0.000524	0.00028	0.000617	0.000503	0.000339	0.000376	0.000447	0.000811	0.000959
V(10)			0	0	3.6e-05	8.2e-05	0	0	0	0	0	4.6e-05	0.000221	0.0002	0.000285	0.000728	0.001978	0.002057	0.001672	0.000483	0.000172	0.000106	0.000157	0.000233	0.000165
A(85)			0	0	3.6e-05	0.000206	0.000129	0.0007	0.000572	0.000155	0.000465	0.000139	0.000443	0.000271	0.000346	0.000892	0.000532	0.00073	0.000797	0.000443	0.000523	0.000548	0.000497	0.000602	0.000468
I(76)			0.000255	0	0.000144	8.2e-05	0	0.0007	0.000191	0	8.5e-05	7e-05	0.000332	0.000328	0.000492	0.000997	0.001822	0.001262	0.000779	0.000208	0.000151	0.000188	0.000225	0.000257	0.000226
L(87)			0	0	0.000469	0.000454	0	0.0001	0	7.8e-05	4.2e-05	9.3e-05	0.000203	2.9e-05	0.00068	0.001083	0.000372	0.000318	0.002506	0.001294	0.000155	0.000115	0.000154	0.000486	0.000167
T(30)			0.000255	0	0	4.1e-05	0.000387	0	0	0	0	0	3.7e-05	0.0001	0.000164	2.6e-05	0.000113	5.5e-05	4.8e-05	0.000154	0.001259	0.000409	0.000376	0.000732	0.000908
T(208)			0.000255	0	0.000108	0.000454	0.000129	0	0.000381	0.000233	0.000169	0.000487	0.000258	0.000128	0.000316	0.000243	0.00032	0.000329	0.00021	0.00051	0.000264	0.000498	0.00059	0.000411	0.000567
K(180)			0.00331	0	0	0	0	0	0	0	0	0	0.000738	0.001297	0.001749	0.00145	0.000978	0.001158	0.000671	7.4e-05	4e-06	3e-06	4e-06	3e-06	2e-06
W(75)			0	0	0.000361	0.000619	0.000646	0.0001	0.000191	0.000233	0.000169	7e-05	0.000129	0.000185	0.00051	0.000328	0.00061	0.000631	0.000839	0.00059	0.000213	0.000165	0.000236	0.00027	0.000435
C(86)			0.000764	0	0.00018	8.2e-05	0.000129	0	0.000191	7.8e-05	0.0011	0.00218	0.001661	0.000314	0.000194	0.000105	0.000143	0.000187	0.000108	0.000174	0.000243	0.000379	0.000744	0.000565	0.000374
R(158)			0	0.005639	0.000685	8.2e-05	0.000129	0.0001	0	0.000155	4.2e-05	0.000209	7.4e-05	0.0002	0.000255	0.000217	0.000117	0.000115	0.000515	0.000329	0.000159	0.000168	0.000333	0.000766	0.000632
Q(185)			0	0	0	4.1e-05	0.000517	0	0	0	0	0	3.7e-05	0	0.000121	0.000131	3.5e-05	3.3e-05	2.4e-05	5.4e-05	0.000176	0.000175	0.000415	0.001228	0.000751
S(4)			0.002037	0	0.000253	0.000495	0.000517	0.0005	0.000572	0.000233	0.000169	0.00058	0.000572	0.000399	0.000516	0.000374	0.000177	0.000263	0.000186	0.000248	0.000289	0.000247	0.000508	0.000513	0.000371
K(15)			0.000255	0	3.6e-05	0.000206	0.000904	0.0001	0	0	8.5e-05	0.000162	0.000166	0.000257	0.00034	0.000171	0.00032	0.000384	0.000432	0.000771	0.000615	0.000399	0.000454	0.000298	0.000226
S(136)			0	0	0	4.1e-05	0	0	0	0	0	2.3e-05	0.000111	0.000157	0.000267	0.000151	0.000281	0.000422	0.000234	0.000275	0.000117	0.000201	0.000301	0.000397	0.000779
V(66)			0	0	0.000253	0.00066	0.000129	0.0002	0.000191	0.000233	0.000127	0.000765	0.000406	0.000171	0.000231	0.000381	0.000454	0.000642	0.000456	0.000248	0.000172	0.000399	0.000415	0.000359	0.000229
G(6)			0	0	0.000108	0.000165	0.000646	0	0	0	4.2e-05	0.000162	0.000111	0.000242	0.000243	0.000105	4.8e-05	0.000214	0.000282	0.000302	0.00023	0.000346	0.000358	0.000298	0.000741
K(162)			0	0	0	0.000536	0	0	0	0.000233	8.5e-05	0.000325	0.000406	2.9e-05	9.7e-05	0.000243	0.000476	0.000411	0.000246	0.000409	0.00018	0.000237	0.000311	0.000558	0.000421
R(107)			0.000255	0	0.00018	0	0.000775	0.0004	0.000191	0.000233	0.00055	0.000232	0.000129	0.000128	0.000152	0.00021	0.000671	0.000368	0.000204	0.000121	8.4e-05	0.000244	0.000208	0.000257	0.000617
C(33)			0.000255	0	7.2e-05	8.2e-05	0.000387	0.0019	0	7.8e-05	0.00055	0.000533	0.000258	0.000128	0.000146	0.000269	0.000351	0.000521	0.000533	0.000456	0.000151	0.000237	0.000265	0.000301	0.000299
M(84)			0	0	7.2e-05	0.00132	0.000387	0	0.000953	0	4.2e-05	0.000139	0.000221	0.000185	0.000559	0.000361	0.000281	0.000181	0.000342	0.000302	0.000301	0.000356	0.000122	0.000209	0.000358
A(142)			0	0	7.2e-05	0.000371	0.000775	0.002	0	7.8e-05	8.5e-05	0.000278	0.000203	0.000171	0.000291	0.00063	0.000796	0.00062	0.000593	0.000235	0.000105	0.000132	0.0002	9.6e-05	9.2e-05
S(214)			0.000255	0	0.000289	0.000124	0	0	0	0	0.000169	9.3e-05	0.000203	0.000114	0.000115	0.000118	0.000186	0.000291	0.00042	0.000195	7.5e-05	0.000383	0.000276	0.000209	0.000466
I(80)			0	0	0	4.1e-05	0	0	0	0.002564	0.001692	0.000464	0.000203	0.000157	0.000146	8.5e-05	0.000173	0.00023	6.6e-05	3.4e-05	0.000117	0.000148	0.000419	0.000448	0.000389
V(60)			0.000764	0.00188	7.2e-05	4.1e-05	0	0.004401	0.024009	0.011964	0.000804	0.000325	0.000388	0.000128	4.9e-05	6.6e-05	3.9e-05	0.000126	3e-05	0.000168	0.000715	7.6e-05	9.3e-05	7.2e-05	3.5e-05
I(52)			0	0	0	0.001237	0.001033	0	0	0	0	4.6e-05	0.000221	0.000627	0.001026	0.001732	0.000212	9.3e-05	6.6e-05	2e-05	4.2e-05	5.6e-05	5.7e-05	7.5e-05	8.4e-05
T(7)			0	0	0.000108	0.000371	0.000646	0.0005	0	0.000388	0.000254	0.000232	9.2e-05	0.0001	0.000346	0.000197	0.00019	0.000274	0.00036	0.000174	0.000155	0.000241	0.000276	0.000219	0.000242
A(40)			0	0	0.000108	0.000124	0	0	0	0	0	7e-05	0.000166	5.7e-05	9.7e-05	2e-05	3e-05	8.8e-05	0.000102	0.000127	0.000121	0.000303	0.000386	0.0005	0.000356
A(83)			0.000255	0	3.6e-05	0	0	0	0	0	4.2e-05	0.000209	0.000111	7.1e-05	0.000152	0.000171	0.000143	0.000576	0.000533	0.000443	0.000142	8.2e-05	0.000136	0.000294	0.000172
C(64)			0	0	3.6e-05	0.000289	0.000129	0.0002	0.000572	7.8e-05	0.000296	2.3e-05	0.000221	0.000257	0.000134	5.2e-05	3e-05	0.000126	0.000114	0.000409	0.00054	0.000224	0.000233	0.00025	0.00016
G(78)			0	0.00188	0.000325	0.000289	0	0.0004	0	0.000622	0.000254	0.000487	0.000166	0.000185	0.000152	0.000184	7.8e-05	0.00017	0.000192	0.000262	0.000188	0.000257	0.000293	0.000236	0.000122
I(201)			0.001018	0	0	0	0	0	0	0	4.2e-05	0.000185	0.000424	0.001112	0.000753	0.000322	0.000268	0.000176	0.000204	4e-05	2.1e-05	2e-05	9.3e-05	0.000113	0.000157
L(46)			0.004582	0	0.000144	0	0.000129	0.0001	0	0	4.2e-05	7e-05	3.7e-05	5.7e-05	0.000285	0.000105	0.000104	9.9e-05	0.00024	0.000369	0.000117	0.000274	0.000182	0.00013	0.000244
H(148)			0.001527	0	0	4.1e-05	0	0	0	0.000233	0.000338	0.000464	0.000185	0.000114	0.000152	0.000367	0.000229	0.000165	0.000198	8e-05	5e-05	0.000195	0.000157	0.000216	0.000182
N(207)			0	0	0	0	0	0	0	0	0.000127	0	3.7e-05	0.000157	8.5e-05	5.2e-05	3e-05	0.000165	0.000138	0.000624	0.000477	0.000201	0.000136	7.2e-05	6.4e-05
I(97)			0	0	0	0	0	0	0	7.8e-05	0	2.3e-05	0.000166	0.0001	0.000182	0.000223	0.000351	0.000466	0.000198	8.7e-05	4.2e-05	6.9e-05	0.000211	0.000109	7.5e-05
R(146)			0	0	7.2e-05	0.000206	0	0.0001	0.000191	0	0.000169	0.000116	9.2e-05	0.0002	0.000115	7.9e-05	0.000199	0.00011	0.000228	7.4e-05	5.4e-05	0.000102	0.000129	8.2e-05	0.000264
F(100)			0	0	0	0	0	0.0001	0.000381	7.8e-05	0	0	3.7e-05	7.1e-05	1.2e-05	7.2e-05	0.000126	0.00017	0.000186	5.4e-05	3.8e-05	3.3e-05	0.000186	0.000332	0.000244
E(167)			0	0	0	0.000289	0	0	0.000191	7.8e-05	4.2e-05	0	3.7e-05	5.7e-05	7.9e-05	9.2e-05	5.2e-05	6e-05	0.000216	0.000201	0.000172	0.000158	0.000136	0.000168	0.000204
L(124)			0.000255	0	0.000505	0.000124	0	0	0.002477	0	8.5e-05	7e-05	0.000314	4.3e-05	0.000115	0.000131	0.000164	0.000126	0.000162	0.000161	0.000167	0.000106	0.0001	0.000151	0.000122
A(68)			0	0	3.6e-05	0	0	0.0002	0.001143	0.000233	4.2e-05	0	0	1.4e-05	9.1e-05	0.000177	0.00013	9.9e-05	0.000186	8.7e-05	9.6e-05	0.000148	0.000308	0.000116	0.000105
N(74)			0	0	0	0	0.000129	0.0001	0	7.8e-05	0.000254	0.000278	3.7e-05	0.0001	6.1e-05	7.2e-05	1.7e-05	0.000148	0.000174	5.4e-05	9.6e-05	1e-05	6.1e-05	7.2e-05	0.000361
G(89)			0	0	3.6e-05	0	0	0	0	0	0	2.3e-05	0	4.3e-05	6.1e-05	6.6e-05	2.6e-05	3.3e-05	1.8e-05	4.7e-05	0.000284	0.000218	0.000197	3.4e-05	0.000232
I(48)			0.003055	0	0	0	0	0	0	0	0.001735	0.000835	0.000166	0.000143	0.00017	0.000269	0.000316	0.000137	0.000132	7e-06	4.6e-05	5.3e-05	5e-05	4.1e-05	2.7e-05
L(138)			0.000255	0	0	0	0	0	0	0.000311	0.000212	7e-05	7.4e-05	0.000399	0.000814	0.000728	2.6e-05	1.1e-05	1.8e-05	7e-06	1.3e-05	1.6e-05	1.8e-05	3.8e-05	2.5e-05
S(173)			0	0	3.6e-05	4.1e-05	0	0.0001	0.000381	0	0.000423	0.000116	3.7e-05	0.000214	8.5e-05	0.000144	0.000199	0.00023	6e-05	8e-05	7.1e-05	5.6e-05	7.2e-05	8.9e-05	0.000115
A(188)			0.000255	0	0	0.000165	0.000129	0.0001	0	0	0	0	9.2e-05	4.3e-05	7.3e-05	0.000118	0.000117	0.000104	1.2e-05	3.4e-05	1.7e-05	5.9e-05	0.000136	0.000284	0.000137
T(77)			0	0	3.6e-05	0	0.000129	0	0	0	0	0	7.4e-05	0.000228	0.000255	0.000105	9.5e-05	0.000143	0.000192	2.7e-05	1.7e-05	4.3e-05	6.4e-05	2.1e-05	0.000187
E(11)			0	0	0	0	0	0	0	0	8.5e-05	7e-05	9.2e-05	0.000356	6.1e-05	3.3e-05	1.7e-05	2.2e-05	6e-05	2.7e-05	2.5e-05	8.6e-05	0.000179	0.000267	0.000132
A(38)			0.000764	0	3.6e-05	4.1e-05	0	0.0002	0.000572	0.000466	8.5e-05	0.000116	9.2e-05	0.000157	6.7e-05	9.2e-05	7.8e-05	0.000203	0.000324	0.000141	8.8e-05	7.3e-05	6.8e-05	4.4e-05	6.9e-05
L(129)			0	0	0.000613	0.000536	0	0	0	0	0	0	1.8e-05	7.1e-05	3.6e-05	7.2e-05	0.000164	0.000154	0.000102	4.7e-05	8.8e-05	7e-06	5.7e-05	0.000263	8.2e-05
R(101)			0	0	0	0	0	0	0.000572	0	0	0	1.8e-05	0	1.8e-05	4.6e-05	4.3e-05	1.6e-05	6e-05	0	2.5e-05	8.6e-05	0.000186	0.000216	0.000202
V(88)			0	0	3.6e-05	4.1e-05	0	0.0001	0	0	0.000254	0.000139	5.5e-05	7.1e-05	9.7e-05	0.000217	0.000113	8.2e-05	4.2e-05	4e-05	6.7e-05	0.000135	7.9e-05	0.000123	5.3e-05
E(12)			0	0	0	0.000124	0	0	0	0	4.2e-05	0	1.8e-05	1.4e-05	6.1e-05	2e-05	1.7e-05	0.000417	0.00015	8e-05	5.4e-05	8.6e-05	0.000132	0.000109	3.3e-05
M(91)			0	0	0	0	0	0	0.000381	0	4.2e-05	0	1.8e-05	0	0.00014	3.3e-05	0.000121	8.2e-05	4.2e-05	3.4e-05	0.000109	0.000125	0.000132	0.00013	6e-05
I(24)			0	0	0	0	0	0	0	0	0	0	3.7e-05	0.000143	9.7e-05	0.000144	8.7e-05	8.8e-05	0.00012	2e-05	2.9e-05	5.9e-05	6.4e-05	0.000174	8.7e-05
S(197)			0	0	0.000469	4.1e-05	0	0	0	0	0	4.6e-05	1.8e-05	1.4e-05	6.1e-05	5.9e-05	2.2e-05	3.3e-05	4.2e-05	5.4e-05	0.00013	0.000241	0.000172	9.2e-05	2.2e-05
I(151)			0	0	0	4.1e-05	0	0	0	0	0	2.3e-05	1.8e-05	2.9e-05	3.6e-05	3.3e-05	0.000407	0.000176	0.000132	5.4e-05	3.3e-05	3.6e-05	0.000107	5.1e-05	3.2e-05
F(53)			0	0	3.6e-05	0	0	0	0	0	4.2e-05	0	1.8e-05	1.4e-05	6e-06	2e-05	8.7e-05	2.7e-05	4.2e-05	1.3e-05	4.2e-05	8.6e-05	0.000168	0.000161	0.000124
L(90)			0	0	0.000649	0	0.000129	0	0	7.8e-05	4.2e-05	2.3e-05	9.2e-05	4.3e-05	7.9e-05	0.000112	0.000113	0.000236	0.000156	0.000107	2.9e-05	5.3e-05	3.6e-05	6.2e-05	2.8e-05
I(73)			0	0	0	0	0	0	0	0	4.2e-05	0.000162	0.000221	0.000428	0.000103	0.000138	4.3e-05	7.1e-05	5.4e-05	0.000101	4.2e-05	4.6e-05	5e-05	1.7e-05	8e-05
W(31)			0.000255	0	0.000216	0.002351	0.001033	0	0	0	8.5e-05	2.3e-05	9.2e-05	4.3e-05	6.1e-05	3.9e-05	4.3e-05	3.3e-05	3.6e-05	2e-05	4.2e-05	5.3e-05	4.3e-05	7.9e-05	5.9e-05
I(128)			0	0	3.6e-05	0	0	0	0	0.000466	0	7e-05	7.4e-05	1.4e-05	5.5e-05	0.00021	0.0001	0.000115	1.8e-05	7.4e-05	3.3e-05	5.9e-05	8.2e-05	7.2e-05	5.5e-05
I(161)			0	0	0	0	0	0	0	0	0	4.6e-05	7.4e-05	1.4e-05	1.2e-05	6.6e-05	3e-05	2.7e-05	4.2e-05	0	2.9e-05	7.3e-05	7.2e-05	4.4e-05	0.000182
L(16)			0	0	0.000144	0.000124	0	0	0	7.8e-05	0	2.3e-05	0	0	6e-06	6.6e-05	0.00016	0.000302	0.000276	0.000107	1.7e-05	1.6e-05	1.1e-05	3.8e-05	1e-05
T(127)			0.000255	0	0	0	0	0	0	0	0	0	1.8e-05	0	6.1e-05	6.6e-05	4e-06	7.7e-05	3.6e-05	6e-05	4.6e-05	9.9e-05	5.4e-05	0.000144	7.7e-05
L(67)			0	0	7.2e-05	4.1e-05	0	0	0.000191	0	0	0	3.7e-05	0	5.5e-05	0	9e-06	7.1e-05	1.8e-05	2e-05	1.3e-05	3.6e-05	6.1e-05	0.000164	0.000124
R(186)			0	0	0	0	0	0.0001	0	0	0	7e-05	7.4e-05	2.9e-05	6e-06	0.000105	3.9e-05	2.2e-05	1.8e-05	6e-05	6.3e-05	6.6e-05	0.000104	0.000106	6.5e-05
I(144)			0	0	3.6e-05	8.2e-05	0	0	0	0	8.5e-05	7e-05	0	0.0001	7.3e-05	6.6e-05	6.5e-05	7.1e-05	9e-05	0.000107	0.000176	3.3e-05	2.9e-05	2.1e-05	2.8e-05
D(160)			0	0	0	0	0	0	0	7.8e-05	0	2.3e-05	1.8e-05	5.7e-05	6.1e-05	5.2e-05	5.2e-05	4.9e-05	1.2e-05	0.000107	9.2e-05	9.6e-05	7.5e-05	3.4e-05	4.5e-05
R(44)			0	0	0	0	0	0	0.000381	7.8e-05	0	4.6e-05	5.5e-05	0.000114	0.000109	9.2e-05	4.3e-05	2.7e-05	3.6e-05	0.000161	3.3e-05	2.3e-05	5e-05	6.2e-05	5.2e-05
P(123)			0	0	3.6e-05	0	0	0	0	0.001243	0	2.3e-05	1.8e-05	5.7e-05	4.3e-05	3.9e-05	9e-06	9.9e-05	3e-05	0	5e-05	4.6e-05	6.8e-05	0.00012	4.8e-05
R(174)			0	0	3.6e-05	0	0	0.0001	0	0	0	0	3.7e-05	1.4e-05	0.000152	9.2e-05	1.3e-05	1.1e-05	1.2e-05	6e-05	4.6e-05	7.3e-05	5.7e-05	4.1e-05	8e-05
I(168)			0	0	0	0	0.000129	0	0	0	0	4.6e-05	3.7e-05	7.1e-05	3.6e-05	1.3e-05	1.3e-05	1.1e-05	0	1.3e-05	2.1e-05	4.9e-05	2.1e-05	5.8e-05	0.000162
L(93)			0	0	3.6e-05	4.1e-05	0	0	0	0	0	0	0	5.7e-05	5.5e-05	5.9e-05	3.9e-05	2.7e-05	4.2e-05	3.4e-05	6.7e-05	5.9e-05	4.3e-05	6.8e-05	6.2e-05
I(8)			0	0	3.6e-05	0.000124	0.000258	0	0.000572	0	0	2.3e-05	3.7e-05	0	0.000121	9.2e-05	5.2e-05	2.7e-05	3e-05	7e-06	0.0001	4.6e-05	4.7e-05	1.7e-05	3.8e-05
I(49)			0	0	0	0	0	0	0	0	0	7e-05	0.000166	4.3e-05	4.9e-05	5.9e-05	0.000138	4.9e-05	9e-05	1.3e-05	4.2e-05	2e-05	5.7e-05	3.8e-05	2.3e-05
V(139)			0	0	0	0	0	0	0	0	0	0	5.5e-05	4.3e-05	0.000103	8.5e-05	4.3e-05	0.00011	9.6e-05	2.7e-05	4e-06	2e-05	4.7e-05	6.2e-05	3.8e-05
G(126)			0	0	0	8.2e-05	0	0	0	7.8e-05	0	4.6e-05	5.5e-05	1.4e-05	3.6e-05	4.6e-05	4.8e-05	0	2.4e-05	5.4e-05	8.4e-05	1.3e-05	2.5e-05	4.8e-05	9.4e-05

## Sheet: North America
	2019-11-30	2019-12-31	2020-01-31	2020-02-29	2020-03-31	2020-04-30	2020-05-31	2020-06-30	2020-07-31	2020-08-31	2020-09-30	2020-10-31	2020-11-30	2020-12-31	2021-01-31	2021-02-28	2021-03-31	2021-04-30	2021-05-31	2021-06-30	2021-07-31	2021-08-31	2021-09-30	2021-10-31	2021-11-30
I(82)			0.002174	0	0.000114	0	7.7e-05	0	0.002481	0.00097	0.000232	0.000381	0.000188	0.001651	0.033011	0.012335	0.022023	0.030086	0.062699	0.440531	0.916012	0.986875	0.996058	0.998584	0.969003
A(81)			0.002174	0	0.000114	9.7e-05	0	0.000135	0	0	7.7e-05	9.5e-05	0.000617	0.000275	0.000412	0.000685	0.000889	0.002495	0.003732	0.002591	0.00386	0.019116	0.01782	0.013762	0.006245
S(197)			0	0	0	0	0	0	0.000211	0.000404	0.000387	4.8e-05	2.7e-05	7.3e-05	0.00036	0	2.1e-05	3.2e-05	0.000472	0.010915	0.022414	0.016871	0.010715	0.005845	0.002977
T(30)			0	0	0	0	0	6.8e-05	0	0.000162	0	4.8e-05	0	7.3e-05	0.000645	3.7e-05	0.000118	0.000144	7.4e-05	0.000883	0.004283	0.008274	0.010395	0.011155	0.010555
D(3)			0.002174	0	0.003749	0.002511	0.003161	0.000879	0.000792	0.023113	0.02889	0.014244	0.009623	0.00189	0.001819	0.00044	0.000299	0.0004	0.000445	0.000362	0.000401	0.000422	0.000471	0.000524	0.028609
V(70)			0	0	0.002329	0.003042	0.005475	0.008385	0.005859	0.005819	0.003563	0.003954	0.002466	0.003963	0.005858	0.007848	0.009129	0.018447	0.024514	0.018371	0.002894	0.000709	0.001331	0.001541	0.001279
A(63)			0	0	0	0.000386	7.7e-05	0.000135	0.000158	0.000242	0.000232	9.5e-05	0.000134	0.000257	0.001671	0.001027	0.000716	0.000485	0.000269	0.001187	0.000461	0.000166	0.000178	0.000239	0.03031
Q(19)			0	0	5.7e-05	0	0.000463	0	0	0	0	0	8e-05	0.00022	0.001121	3.7e-05	8.3e-05	9.6e-05	0.000176	0.000159	3.3e-05	0.000124	0.000121	9.9e-05	0.030136
A(2)			0.002174	0	0.000795	0.001738	0.003778	0.011022	0.01098	0.004768	0.001781	0.002191	0.005951	0.001816	0.002696	0.002983	0.003251	0.004425	0.005427	0.003952	0.003767	0.003445	0.004467	0.004653	0.00443
F(28)			0.002174	0	5.7e-05	4.8e-05	0.000308	0	5.3e-05	0.000162	0	4.8e-05	0.000456	0.000771	0.001575	0.006944	0.012568	0.010663	0.010965	0.004343	0.000165	3.3e-05	1e-05	8.4e-05	2.9e-05
L(29)			0	0	5.7e-05	4.8e-05	0.000308	0.00027	0.000211	0	0.000232	0.000619	0.000322	0.000495	0.000656	0.00033	0.000229	0.00056	0.002158	0.002794	0.002954	0.003032	0.002074	0.002467	0.002396
D(209)			0	0	0.000398	0.000724	0.001002	0.002299	0.001636	0.000647	0.001007	0.001858	0.005361	0.002752	0.001406	0.001369	0.001021	0.001701	0.003427	0.00236	0.000933	0.001185	0.001899	0.001761	0.001581
H(125)			0	0	0.000398	0.001111	0.001465	0.001217	0.001742	0.001293	0.001627	0.001858	0.001582	0.001908	0.001977	0.002848	0.00296	0.002069	0.001732	0.001723	0.000686	0.000796	0.001398	0.001636	0.002172
G(89)			0	0	0	0.000241	0	0	0	0	0	0	0.000134	9.2e-05	0.000159	0.00077	0.004794	0.007325	0.004992	0.003026	0.000351	0.000121	7.7e-05	0.000144	0.000477
A(85)			0	0.007143	0.000341	0.000435	0.000154	0.00027	0.000581	0	0.000387	0.000619	0.002359	0.004036	0.004684	0.004144	0.003092	0.000992	0.000843	0.00123	0.002125	0.000968	0.000444	0.000596	0.000339
H(155)			0	0	0.000284	0.000193	0.000231	0.000744	0.00095	0.000808	0.00062	0.00081	0.002332	0.003376	0.003817	0.002433	0.002098	0.000768	0.001899	0.000709	0.000802	0.000845	0.000645	0.000531	0.000379
V(23)			0	0	0.000682	0.00029	0.007248	0.000879	0.000581	0.000242	0.000697	0.000476	0.000831	0.000917	0.000856	0.000795	0.001424	0.001578	0.001621	0.00123	0.001433	0.000808	0.000652	0.000915	0.000656
A(69)			0	0	0.000625	0.000193	0.000231	0.000135	0.00037	8.1e-05	0.00062	0.000524	0.000482	0.000385	0.000571	0.00088	0.000848	0.000741	0.001185	0.000811	0.000796	0.000908	0.00085	0.000755	0.001378
I(52)			0	0	0.00017	0	0.000154	0	0	0.000485	0	9.5e-05	0.000188	0.000128	0.000137	0.000122	0.000132	7.5e-05	5.6e-05	0.000145	0.000785	0.001185	0.001365	0.001621	0.001407
M(109)			0	0	0.00017	0.000773	0.001079	0.000203	0.000633	0.000727	0.003098	0.003906	0.004825	0.001798	0.001364	0.000807	0.000653	0.000858	0.000769	0.000478	0.000357	0.000287	0.00041	0.000452	0.000845
K(15)			0	0	0	0.000676	0.001696	0.000135	0	8.1e-05	0.00031	0.00081	0.000214	0.000165	0.000338	0.000611	0.000111	9.1e-05	0.000102	0.000246	0.00034	0.00064	0.001065	0.001526	0.001322
L(17)			0	0	0.000114	0	0.000308	0.000135	0.000475	0.001131	0.001394	0.000381	0.000429	0.000477	0.001216	0.001601	0.001681	0.00185	0.001343	0.000869	0.000302	0.00032	0.00041	0.000395	0.00045
I(48)			0	0	0	0	0	0	0	0	0.000465	0.000333	0.001957	0.006072	0.004388	0.001785	0.000799	0.000219	0.00012	0.000434	0.000121	0.000118	0.000242	0.000463	0.000536
I(76)			0	0	0	0	0	0	0	0.000647	0	0.000429	0.000188	0.000715	0.001005	0.000562	0.000431	0.000336	0.000315	0.000941	0.000604	0.000643	0.000894	0.000782	0.000629
L(46)			0.002174	0	0.00017	0.000338	0	6.8e-05	0.000158	8.1e-05	0	0.000191	8e-05	0.00055	0.000793	0.000623	0.000139	0.000181	6.5e-05	0.000159	0.000313	0.000567	0.000995	0.001006	0.001058
A(104)			0.002174	0	0	0	0	6.8e-05	0.000317	0.000647	0.000155	0.001143	0.001474	0.003669	0.000782	0.001308	0.001112	0.001194	0.001574	0.001592	0.000154	2.1e-05	6.4e-05	7.6e-05	2.9e-05
G(6)			0	0	0	9.7e-05	0.000154	0.000135	0.000106	8.1e-05	0.000775	0.000286	0.000161	0.000128	0.000476	0.000159	0.000195	0.000267	0.000148	0.000318	4.9e-05	0.000214	0.000837	0.00077	0.001194
C(33)			0.006522	0	0	0.000628	0.000154	0.000135	0.000106	0.000242	0.000155	0.000143	0.000134	0.00033	0.000402	0.000171	0.000507	0.000874	0.000574	0.000405	0.000165	0.000232	0.00038	0.000585	0.00101
T(208)			0	0	5.7e-05	0.000483	0.000463	0.000811	0.000211	0.000323	0	0.000143	0.000322	0.000367	0.000708	0.000501	0.000723	0.000453	0.000704	0.000362	0.000236	0.000407	0.00041	0.000467	0.000506
A(98)			0	0	5.7e-05	9.7e-05	0.000308	0.000203	0.000264	0.000323	0.000155	0.000333	0.000188	0.000734	0.001417	0.000819	0.000472	0.000235	0.000333	0.000261	0.000516	0.000416	0.000471	0.0003	0.000296
S(4)			0	0	5.7e-05	9.7e-05	0.000231	6.8e-05	0.000475	0.000808	0.000852	9.5e-05	0.000536	0.001192	0.000814	0.000293	0.000181	0.000267	0.000343	0.000536	0.000538	0.000468	0.000383	0.000406	0.000208
M(84)			0	0	0	9.7e-05	0	0	0.000158	0.000727	0.001084	0.000381	0.000482	0.00066	0.000952	0.000746	0.000243	0.000245	0.000445	0.000275	0.000253	0.000332	0.000544	0.000368	0.000317
I(201)			0	0	0	0	0	0	0	8.1e-05	0	4.8e-05	0	3.7e-05	2.1e-05	0.000244	0.001077	0.001855	0.001093	0.000391	4.4e-05	2.1e-05	9.4e-05	0.000232	0.000307
R(44)			0	0	0	0	7.7e-05	0	0.000106	0	0	0.000143	0.000697	0.000826	0.000645	0.000513	0.000403	6.4e-05	9e-06	4.3e-05	4.4e-05	0.000338	0.000306	0.000493	0.000461
S(214)			0	0	5.7e-05	0.000338	0.000154	0.000406	0.000106	0.001616	0	0.000143	0.000563	9.2e-05	9.5e-05	0.00011	9e-05	0.000112	0.00012	0.000434	0.000126	0.000193	0.000239	0.000509	0.0008
R(107)			0	0	5.7e-05	0	0.000154	0.00027	0.000211	0.000242	0.000232	4.8e-05	0.001903	0.000936	0.001776	0.000477	0.000368	0.00016	0.000157	0.000116	0.000115	0.00013	0.000134	0.000258	0.000293
L(87)			0	0	5.7e-05	4.8e-05	0	0	0.000106	8.1e-05	0.000232	4.8e-05	2.7e-05	0.000165	0.00018	0.000208	0.000167	0.000357	0.000621	0.002186	0.000703	0.000124	0.000239	0.000213	0.000171
V(66)			0	0	0	9.7e-05	0.000231	0.000135	5.3e-05	0	0	9.5e-05	0.000107	0.000147	0.000254	0.000159	0.000236	0.000261	0.000398	0.001361	0.000313	0.000133	0.000279	0.000478	0.000339
A(83)			0	0	0.00017	4.8e-05	0.000386	0.003178	0.003853	0.001859	0.000155	0.000238	8e-05	3.7e-05	0.000243	0.000171	0.000188	9.1e-05	0.000111	0.000449	0.000137	0.000136	0.000188	0.000448	0.000488
R(158)			0	0	0.000398	0.000145	0	0.000609	0.000158	0	0	4.8e-05	0.000134	0.00022	0.000254	0.000623	0.000278	0.000336	0.000556	0.000232	0.00022	0.000293	0.0004	0.000266	0.000195
A(40)			0	0	5.7e-05	0	0	0	0.000158	8.1e-05	0	4.8e-05	5.4e-05	0.000128	0.000211	0.000122	0.000222	0.000304	0.000491	0.000738	0.000209	0.000287	0.000323	0.000296	0.000363
H(148)			0	0	0	4.8e-05	7.7e-05	0.000135	0.000264	0.000242	7.7e-05	9.5e-05	0.000188	0.000238	0.00037	0.000159	0.000118	2.7e-05	6.5e-05	5.8e-05	7.7e-05	0.000193	0.000181	0.000395	0.000818
C(86)			0	0	0.000114	0	0.000231	6.8e-05	5.3e-05	0.000242	0.002866	0.002525	0.001126	0.000165	0.000211	6.1e-05	0.000111	0.000107	0.000176	0.00013	0.00039	0.000293	0.000158	0.000296	0.000301
T(7)			0	0	0.00017	0.000145	0.000154	6.8e-05	0.00037	0.000323	0.00031	0.000429	0.000161	0.000128	0.00037	0.000183	0.000195	0.000235	0.000241	0.000145	0.000198	0.000214	0.00035	0.000372	0.000325
T(175)			0	0	0.003522	0.000917	0.000694	0.000203	0.000475	8.1e-05	0.000232	0.000619	0.000241	0.000257	0.00018	8.6e-05	0.000236	0.000176	0.000102	8.7e-05	0.000253	0.000278	0.000195	0.000247	0.000267
L(34)			0	0	0.000114	0.000193	0.000308	6.8e-05	0.000211	0.000242	0.000155	9.5e-05	0.000724	0.000385	0.000381	0.000428	0.000333	0.000373	0.000287	0.000333	0.000165	0.000124	0.000175	0.000232	0.000301
I(73)			0	0	5.7e-05	0	0	0	5.3e-05	0	7.7e-05	0	2.7e-05	7.3e-05	9.5e-05	7.3e-05	5.6e-05	6.4e-05	9.3e-05	5.8e-05	9.3e-05	0.000278	0.000437	0.000509	0.000357
E(167)			0	0	0	4.8e-05	0.000154	0.000609	0.000211	0	0	4.8e-05	2.7e-05	7.3e-05	0.000169	9.8e-05	3.5e-05	4.3e-05	0.000148	5.8e-05	0.000598	0.00029	0.000138	0.000311	0.000368
V(10)			0	0	0	0	0	6.8e-05	0.000317	0.002748	0.00062	0.000143	0.000295	0	0.000169	0.000367	0.000347	0.000357	0.000296	0.000246	0.00011	0.000115	0.000245	0.00019	0.000163
S(136)			0	0	0.000114	0.000145	0	6.8e-05	0.000211	8.1e-05	0	9.5e-05	5.4e-05	0.00033	0.000285	0.000623	0.000215	0.000117	0.00012	8.7e-05	0.000126	0.000154	0.000192	0.000251	0.000328
R(146)			0	0	5.7e-05	0.00029	7.7e-05	0.000135	0.000106	0.000323	0	9.5e-05	0.000268	0.000404	0.000233	0.000183	0.000139	0.000123	9.3e-05	0.00055	0.000187	0.000205	0.000158	0.000201	0.000312
G(78)			0	0	0	0.000145	0.000154	0.000338	0.000264	8.1e-05	7.7e-05	4.8e-05	0.000268	0.000147	0.000211	0.000232	0.000153	0.000133	0.000222	0.000536	0.00022	0.00016	0.000326	0.000251	0.000115
K(162)			0	0	5.7e-05	0.000628	0.000694	0.000135	0.000106	0	0.000232	0	0.000134	0.00033	0.000201	0.000196	2.1e-05	0.000171	0.000157	2.9e-05	4.4e-05	0.000163	0.000168	0.000323	0.000365
Q(185)			0	0	0	0	0	0	0	8.1e-05	7.7e-05	0	0.000107	5.5e-05	0.000106	6.1e-05	2.1e-05	5.3e-05	9e-06	8.7e-05	0.000143	0.000181	0.000363	0.000372	0.000328
A(142)			0	0	0.000114	9.7e-05	0.000231	0.000811	0.000211	0.000404	7.7e-05	0.000191	0.000161	0.000128	0.000296	0.00011	0.000306	0.000235	0.000139	0.000159	9.3e-05	0.000136	0.000121	0.000262	0.000189
S(212)			0	0	0	0	0	0	0	0	0	4.8e-05	8e-05	0.000128	0.000137	0.000134	8.3e-05	7.5e-05	0.00012	7.2e-05	6e-05	0.000142	0.000218	0.000376	0.000315
S(94)			0	0	0.000114	4.8e-05	0	6.8e-05	0.000211	0	7.7e-05	4.8e-05	0.000134	0.000147	0.000127	0.000281	0.000174	9.1e-05	0.000157	7.2e-05	8.8e-05	0.000148	0.000181	0.000213	0.000171
L(93)			0	0	5.7e-05	0	0	0	0.000211	0.000242	0.00031	0.000143	8e-05	5.5e-05	5.3e-05	4.9e-05	2.1e-05	4.3e-05	2.8e-05	0.00013	2.7e-05	7.8e-05	9.7e-05	0.000144	0.000472
L(124)			0	0	0.000114	4.8e-05	0	0.000135	0.000158	8.1e-05	0	4.8e-05	0	5.5e-05	8.5e-05	4.9e-05	5.6e-05	0.00016	0.000139	4.3e-05	0.000159	0.000124	8.4e-05	0.000296	0.00016
C(64)			0	0	0.00017	9.7e-05	0.000771	0.000203	0.000264	0.000162	0	4.8e-05	0	1.8e-05	8.5e-05	0.000147	0.000222	0.000139	0.000139	5.8e-05	7.7e-05	9.7e-05	0.000134	0.000243	0.000104
I(97)			0	0	0	0	0	0.000135	0	0	0	9.5e-05	2.7e-05	0.00011	8.5e-05	0.000293	8.3e-05	5.3e-05	0.000565	0.000376	0.000192	7.2e-05	7.4e-05	8.4e-05	0.000144
A(188)			0	0	0	0.000145	0.000617	0.000947	0.001056	0.000323	7.7e-05	0.000572	0.000348	0.000275	0.000159	0.000171	0.000125	0.000149	8.3e-05	1.4e-05	7.1e-05	0.0001	6.7e-05	0.000156	5.6e-05
I(49)			0	0	0.000227	0	0	0	0	0	0	4.8e-05	5.4e-05	0	6.3e-05	0.00011	2.1e-05	1.1e-05	0	1.4e-05	2.2e-05	0.000329	0.000356	0.000106	3.2e-05
A(38)			0	0	0	9.7e-05	7.7e-05	6.8e-05	0.000264	8.1e-05	0.000155	4.8e-05	0.000134	0.000147	0.000127	0.000134	0.000306	0.000133	0.000194	0.000232	0.000214	6.6e-05	4.7e-05	7.6e-05	8.3e-05
A(68)			0	0	0	4.8e-05	7.7e-05	0.000406	5.3e-05	0.000162	0.000387	9.5e-05	0.000107	3.7e-05	0.000159	0.000208	0.000146	0.000107	0.000102	0.000695	0.000225	5.7e-05	5e-05	7.6e-05	4.8e-05
W(75)			0	0	5.7e-05	0	0.000154	0.00027	0.000158	0	7.7e-05	0.000143	0	9.2e-05	7.4e-05	0.000232	0.000167	0.000181	0.000194	0.000203	5.5e-05	4.5e-05	0.000118	0.000102	0.000112
I(161)			0	0	0	0	0	6.8e-05	0	0	7.7e-05	0.000143	5.4e-05	9.2e-05	3.2e-05	9.8e-05	0.000285	0.000389	0.000287	0.000101	2.2e-05	7.5e-05	8.4e-05	6.1e-05	5.3e-05
I(80)			0	0	0	0	0	0	5.3e-05	8.1e-05	0.000155	0	2.7e-05	0	9.5e-05	0.000147	7e-06	2.1e-05	9.3e-05	2.9e-05	8.2e-05	6.9e-05	0.000198	0.000133	0.000197
V(60)			0	0	0	4.8e-05	0	6.8e-05	0.000106	0.000162	7.7e-05	9.5e-05	0.000107	3.7e-05	8.5e-05	3.7e-05	4.9e-05	0.000229	0.000639	0.000246	6.6e-05	2.7e-05	7.7e-05	9.5e-05	3.5e-05
I(8)			0	0	0.000114	0.000145	7.7e-05	0	0	0	0	4.8e-05	0	5.5e-05	4.2e-05	0.000134	5.6e-05	1.1e-05	1.9e-05	5.8e-05	6.6e-05	0.000103	0.000232	0.000171	0.000115
M(91)			0	0	5.7e-05	0	0	6.8e-05	0	0	0.000155	9.5e-05	5.4e-05	3.7e-05	2.1e-05	3.7e-05	6.3e-05	2.1e-05	4.6e-05	4.3e-05	2.2e-05	7.5e-05	0.000229	0.000167	0.000157
D(215)			0	0	0	0.001207	0.001311	0.001961	5.3e-05	0	7.7e-05	4.8e-05	0.000134	0.000275	2.1e-05	1.2e-05	7.6e-05	0.000155	4.6e-05	7.2e-05	3.8e-05	6.9e-05	4.4e-05	6.1e-05	3.7e-05
S(173)			0	0	0	0	0	6.8e-05	5.3e-05	0	0	4.8e-05	0.000107	0.000147	7.4e-05	3.7e-05	0.000125	0.000112	0.000194	8.7e-05	5.5e-05	8.1e-05	8.1e-05	9.5e-05	9.9e-05
I(24)			0	0	0	0	0	6.8e-05	5.3e-05	0.000162	7.7e-05	4.8e-05	8e-05	7.3e-05	8.5e-05	9.8e-05	0.000299	2.7e-05	0.000102	2.9e-05	2.2e-05	1.2e-05	7.7e-05	0.000209	8e-05
N(207)			0	0	0	0	0	0.000203	0.000106	0	7.7e-05	0	0	5.5e-05	5.3e-05	2.4e-05	4.9e-05	5.9e-05	1.9e-05	1.4e-05	5e-06	0.000106	0.000148	9.1e-05	0.000163
E(11)			0	0	5.7e-05	0	7.7e-05	0	0	8.1e-05	7.7e-05	4.8e-05	5.4e-05	5.5e-05	4.2e-05	6.1e-05	3.5e-05	0.000128	0.000157	4.3e-05	8.8e-05	3.6e-05	8.4e-05	8.4e-05	0.000131
T(77)			0	0	0	9.7e-05	0	0	0	0	0	0	2.7e-05	0.00011	2.1e-05	0.000183	0.000306	6.9e-05	8.3e-05	2.9e-05	1.6e-05	3.9e-05	5e-05	8.7e-05	0.000101
I(128)			0	0	0	0	0	6.8e-05	0.000211	8.1e-05	0	0.000381	2.7e-05	3.7e-05	6.3e-05	0.000171	0.000139	0.000144	0.000148	5.8e-05	2.7e-05	3e-05	6.4e-05	8.4e-05	6.7e-05
R(101)			0	0	0	0	0	0	5.3e-05	0.000566	0.000155	4.8e-05	2.7e-05	5.5e-05	3.2e-05	2.4e-05	1.4e-05	2.1e-05	2.8e-05	1.4e-05	1.6e-05	2.4e-05	3.7e-05	0.000121	0.000253
W(31)			0	0	5.7e-05	0	7.7e-05	6.8e-05	5.3e-05	0	7.7e-05	0	0.000214	5.5e-05	6.3e-05	0.000171	0.000195	0.000101	4.6e-05	0	7.1e-05	2.7e-05	7.1e-05	5.3e-05	8.5e-05
D(160)			0	0	0	0	0	6.8e-05	0.000106	8.1e-05	0.000232	4.8e-05	0	9.2e-05	0.000148	4.9e-05	2.8e-05	4.3e-05	5.6e-05	7.2e-05	0.00017	5.7e-05	6.7e-05	3.8e-05	0.000101
V(88)			0	0	0	0	0.000231	0	0	0	0.000155	0.000381	0.000375	0.00011	8.5e-05	4.9e-05	0.000111	6.4e-05	4.6e-05	0.00013	3.8e-05	8.4e-05	9.1e-05	4.9e-05	2.7e-05
G(79)			0	0	0	0	0	0	0	0	0	0	2.7e-05	0	2.1e-05	2.4e-05	7.6e-05	0.000139	0.000565	0.000101	3.8e-05	2.7e-05	9.4e-05	2.3e-05	2.4e-05
R(186)			0	0	0	0	7.7e-05	0	0.000264	8.1e-05	0.000232	0	0	9.2e-05	1.1e-05	3.7e-05	2.1e-05	9.1e-05	2.8e-05	4.3e-05	9.9e-05	0.000118	5.4e-05	6.5e-05	9.1e-05
I(168)			0	0	0	0	0	6.8e-05	0	0	0	0	5.4e-05	3.7e-05	5.3e-05	4.9e-05	7e-06	2.7e-05	4.6e-05	2.9e-05	2.2e-05	0.000106	0.000101	4.9e-05	0.000147
E(12)			0	0	0	0	7.7e-05	0	0	0	0	4.8e-05	2.7e-05	5.5e-05	9.5e-05	6.1e-05	4.2e-05	4.3e-05	5.6e-05	8.7e-05	6e-05	0.000133	0.000114	6.8e-05	2.1e-05
L(90)			0	0	0	0	0	0.000676	0.000581	0	0	0	2.7e-05	5.5e-05	4.2e-05	3.7e-05	4.2e-05	6.9e-05	5.6e-05	7.2e-05	4.9e-05	4.5e-05	0.000118	7.6e-05	4e-05
I(144)			0	0	0	0	0.000154	6.8e-05	5.3e-05	0	0	4.8e-05	8e-05	1.8e-05	8.5e-05	9.8e-05	3.5e-05	2.7e-05	3.7e-05	1.4e-05	2.2e-05	5.1e-05	0.000134	6.8e-05	9.1e-05
P(123)			0	0	0	9.7e-05	0	0.000135	0.000158	8.1e-05	0	0	0.000188	0	0.000106	8.6e-05	2.8e-05	1.6e-05	9e-06	0	1.6e-05	7.8e-05	0.000121	7.6e-05	6.9e-05
N(43)			0	0	0	0	0	0	0	0	0	0	0	0	4.2e-05	3.7e-05	4.2e-05	0	4.6e-05	0	1.1e-05	0.000166	7.4e-05	6.8e-05	9.3e-05
G(126)			0	0	0	4.8e-05	0	0	5.3e-05	0.000162	7.7e-05	0	8e-05	0	5.3e-05	6.1e-05	6.3e-05	5.9e-05	5.6e-05	0	7.7e-05	4.5e-05	2.7e-05	8e-05	0.000128
G(189)			0	0	5.7e-05	0	7.7e-05	6.8e-05	0	0	0	0	2.7e-05	0	2.1e-05	1.2e-05	6.9e-05	4.3e-05	0	0.000145	4.4e-05	5.7e-05	4e-05	3.8e-05	0.000168
D(190)			0	0	5.7e-05	0	0	0	5.3e-05	8.1e-05	0	0	0	0	5.3e-05	2.4e-05	2.1e-05	5e-06	7.4e-05	2.9e-05	3.8e-05	0.000175	9.1e-05	6.1e-05	3.5e-05
T(127)			0	0	5.7e-05	0	0	0	0	0	0	0	5.4e-05	7.3e-05	4.2e-05	3.7e-05	0	5e-06	1.9e-05	5.8e-05	2.2e-05	5.4e-05	5.4e-05	0.000125	0.000109
V(139)			0.002174	0	0	0	0	0	0	0.000162	0	9.5e-05	0	0	7.4e-05	7.3e-05	2.8e-05	3.7e-05	2.8e-05	2.9e-05	0.000104	7.2e-05	7.4e-05	6.5e-05	4e-05
L(129)			0	0	0	0.00029	7.7e-05	0	0	8.1e-05	0	0	0	1.8e-05	1.1e-05	3.7e-05	3.5e-05	6.4e-05	0.000148	7.2e-05	0.00011	3.3e-05	4e-05	4.6e-05	6.4e-05
F(26)			0	0	0	0	0	0	0	8.1e-05	0	0	0	1.8e-05	0.00019	6.1e-05	0.000195	0.000112	4.6e-05	2.9e-05	3.3e-05	5.1e-05	1.3e-05	3.4e-05	2.9e-05
F(45)			0	0	0	0	0	0	0	0	0	0	0	0	2.1e-05	2.4e-05	0	1.6e-05	0	1.4e-05	5e-06	5.4e-05	0.000161	9.9e-05	3.2e-05
N(5)			0	0	0	0	7.7e-05	0.000203	0	0.000162	0	0	0	5.5e-05	1.1e-05	6.1e-05	2.8e-05	2.1e-05	0	0	1.6e-05	4.8e-05	6.4e-05	8e-05	8e-05
L(145)			0	0	0	0.000145	0	0.000203	5.3e-05	0	0	0	0	3.7e-05	0.000106	0.000122	6.9e-05	2.1e-05	4.6e-05	1.4e-05	5e-06	6e-05	5e-05	6.1e-05	2.4e-05

## Sheet: Occeania
	2019-11-30	2019-12-31	2020-01-31	2020-02-29	2020-03-31	2020-04-30	2020-05-31	2020-06-30	2020-07-31	2020-08-31	2020-09-30	2020-10-31	2020-11-30	2020-12-31	2021-01-31	2021-02-28	2021-03-31	2021-04-30	2021-05-31	2021-06-30	2021-07-31	2021-08-31	2021-09-30	2021-10-31	2021-11-30
I(82)			0	0	0	0	0	0	0	0.000209	0	0	0	0	0.068493	0.046154	0.081911	0.319196	0.34375	0.79745	0.988423	0.99933	1	1	0.843185
D(3)			0	0	0.007806	0	0	0	0.00031	0	0	0	0	0	0.05137	0	0	0.002232	0.005682	0	0	0.000502	0	0.002589	0.176519
Q(19)			0	0	0	0	0	0	0	0	0	0	0	0	0.05137	0	0	0.002232	0.002841	0	0	0	0	0	0.156815
A(63)			0	0	0	0	0	0	0	0	0	0	0	0	0.05137	0	0	0	0	0	0	0	0	0	0.156815
A(2)			0	0	0.00039	0	0	0.001706	0.026189	0.012304	0	0	0	0.009346	0	0	0.003413	0	0.002841	0.007082	0.002026	0.002176	0.002363	0.010355	0.00462
R(44)			0	0	0	0	0	0	0	0	0	0	0	0.492212	0.092466	0	0	0	0	0	0	0.004018	0	0	0.000136
T(208)			0	0	0	0	0	0	0.000155	0	0	0	0	0.492212	0.092466	0	0	0	0	0	0	0	0	0	0.002038
K(162)			0	0	0	0	0	0	0	0	0	0	0	0	0	0	0	0	0	0	0	0.000167	0.001289	0.016239	0.011822
I(168)			0	0	0	0	0	0	0.000155	0.005005	0.119955	0.030189	0	0	0	0	0	0	0	0	0	0	0	0	0
G(89)			0	0	0	0	0	0	0	0	0	0	0	0	0	0	0	0	0	0	0	0.000502	0.014175	0.001647	0
T(175)			0	0	0.019126	0.020339	0	0	0	0	0	0	0	0	0	0	0.003413	0	0	0	0	0	0.000215	0	0
L(17)			0	0	0	0	0	0	0.00031	0.008551	0.006726	0	0	0	0	0	0	0	0	0	0	0	0	0	0
F(28)			0	0	0	0	0	0	0	0	0	0	0	0	0.006849	0.007692	0.064846	0.03125	0.019886	0	0	0	0	0	0
M(84)			0	0	0	0	0	0	0.00093	0.003962	0	0	0	0	0	0	0	0	0	0	0	0	0.000644	0	0
S(4)			0	0	0	0	0	0	0	0	0	0	0	0	0	0	0	0	0	0	0.007236	0.000167	0.000215	0.000235	0
V(60)			0	0	0.00039	0	0	0	0.000155	0	0	0	0	0	0	0	0	0	0.011364	0.028329	0	0	0	0	0
M(109)			0	0	0.00039	0	0	0	0	0	0	0	0	0	0	0	0	0	0	0.001416	0	0.000167	0	0.005178	0.000136
A(83)			0	0	0	0	0	0	0	0	0	0	0	0	0	0	0	0	0	0	0.00492	0.000502	0	0.000706	0.000272
A(142)			0	0	0	0	0	0	0	0.003545	0	0	0	0	0	0	0	0	0	0.002833	0.001158	0	0.000215	0	0
V(70)			0	0	0.001952	0.00113	0	0	0	0	0	0	0.008403	0.003115	0.006849	0	0.010239	0	0	0	0	0	0.000215	0	0.001223
R(146)			0	0	0	0.014689	0	0	0	0	0	0	0	0	0	0	0	0	0	0.001416	0	0.000167	0	0.001177	0.000408
H(148)			0	0	0	0	0	0	0	0	0	0	0	0	0	0	0	0	0	0	0	0	0.002577	0.002353	0
H(125)			0	0	0.00039	0	0	0	0.000465	0.000834	0.001121	0	0.008403	0.003115	0.003425	0	0	0	0.002841	0	0	0.000335	0.000215	0.000235	0.000544
G(189)			0	0	0	0	0	0	0.00031	0	0	0	0	0	0	0	0	0	0	0	0	0.002511	0	0	0
T(7)			0	0	0	0	0	0.001706	0.000155	0.000834	0	0	0	0	0	0.015385	0	0	0	0	0.000289	0	0	0.001647	0
L(34)			0	0	0	0	0	0	0.00031	0.000417	0	0	0	0	0	0.007692	0	0	0	0	0	0.001842	0	0	0
S(214)			0	0	0.001561	0	0	0	0	0	0	0	0	0	0.003425	0	0	0	0	0	0	0	0	0.000471	0.000815
A(69)			0	0	0.00039	0	0	0	0.00031	0	0	0.007547	0	0	0	0	0	0	0	0.002833	0	0	0	0	0.000679
A(40)			0	0	0	0	0	0	0	0	0	0	0	0	0	0	0	0	0	0	0	0	0.000859	0.000471	0.000815
S(212)			0	0	0	0	0	0	0	0	0	0	0	0	0	0	0	0	0	0	0	0	0	0	0.001631
L(46)			0	0	0	0.00226	0	0	0.000155	0	0	0	0	0	0	0	0	0	0.002841	0	0.000868	0	0.001074	0	0
V(66)			0	0	0	0	0	0	0	0	0	0	0	0	0	0	0	0.002232	0	0	0	0.000167	0.001933	0	0
R(158)			0	0	0.000781	0	0	0	0	0	0	0	0	0	0	0	0	0	0	0	0.000289	0.000335	0	0.000235	0.000544
I(49)			0	0	0	0	0	0	0	0	0	0	0	0	0	0	0	0	0	0	0	0	0.000215	0.000471	0.000815
H(155)			0	0	0	0	0	0	0	0	0	0.007547	0	0	0	0	0	0.002232	0.002841	0	0	0.000167	0	0.000235	0.000272
I(151)			0	0	0	0	0	0	0	0.000209	0	0	0	0	0	0	0	0	0	0	0	0	0	0	0.000679
Q(185)			0	0	0	0	0	0	0	0	0	0	0	0	0	0	0	0	0	0	0	0	0	0.001412	0
V(10)			0	0	0	0	0	0	0.000155	0.000417	0	0	0	0	0	0	0	0	0	0	0	0	0.000215	0.000235	0.000136
I(80)			0	0	0.001561	0	0	0	0	0	0	0	0	0.003115	0	0	0	0	0	0	0	0	0	0	0
V(143)			0	0	0	0	0	0	0	0	0	0	0	0	0	0	0	0	0	0	0	0.000837	0	0	0
D(209)			0	0	0.00039	0	0	0	0	0	0.001121	0	0.008403	0	0	0	0	0	0	0	0	0	0.000215	0	0.000136
R(107)			0	0	0	0	0	0.003413	0.000155	0.000209	0	0	0	0	0	0	0	0	0	0	0	0.000167	0	0	0
A(188)			0	0	0	0	0	0	0	0	0	0	0	0	0	0	0	0	0	0	0	0.000167	0.00043	0	0.000136
A(98)			0	0	0	0	0	0.005119	0.000155	0	0	0	0	0	0	0	0	0	0	0	0	0	0	0	0
V(170)			0	0	0	0	0.01626	0	0	0	0	0	0	0	0	0	0	0	0	0	0	0	0	0	0
C(86)			0	0	0	0	0	0	0	0	0	0	0	0	0	0	0	0	0	0	0	0.000167	0	0	0.000272
I(76)			0	0	0.00039	0	0	0	0	0	0	0	0	0	0	0	0	0	0	0.001416	0	0	0.000215	0	0
S(197)			0	0	0	0	0	0	0	0.000209	0.001121	0	0	0	0	0	0	0	0	0	0	0	0.000215	0	0
D(190)			0	0	0	0	0	0	0	0	0	0.003774	0	0	0	0	0	0	0	0	0	0	0	0	0.000272
D(160)			0	0	0	0	0	0	0	0	0	0	0	0	0	0	0	0	0	0	0.000868	0	0	0	0
I(73)			0	0	0	0	0	0	0	0	0	0.007547	0	0	0	0.007692	0	0	0	0	0	0	0	0	0
I(97)			0	0	0	0	0	0	0.00031	0.000209	0	0	0	0	0	0	0	0	0	0	0	0	0	0	0
T(169)			0	0	0	0	0	0	0	0	0	0	0	0	0	0	0	0	0	0	0	0	0	0.000235	0.000272
W(55)			0	0	0	0	0	0	0	0	0	0	0	0	0	0	0	0	0	0.002833	0	0	0	0	0
A(38)			0	0	0	0	0	0	0	0	0	0	0	0.003115	0	0	0	0	0	0	0	0	0.000215	0	0
F(53)			0	0	0	0	0	0	0.000155	0	0	0	0	0	0	0	0	0	0	0.001416	0	0	0	0	0
L(87)			0	0	0	0	0	0	0	0	0	0	0	0	0	0	0	0	0	0	0	0	0.000215	0	0.000136
P(114)			0	0	0	0	0	0	0.000155	0.000209	0	0	0	0	0	0	0	0	0	0	0	0	0	0	0
G(25)			0	0	0	0	0	0	0	0.000209	0	0	0	0	0	0	0	0	0	0	0	0	0	0	0.000136
A(218)			0	0	0.00039	0	0	0	0.000155	0	0	0	0	0	0	0	0	0	0	0	0	0	0	0	0
A(85)			0	0	0	0	0	0	0	0	0	0	0.008403	0.003115	0	0	0	0	0	0	0	0	0	0	0
N(207)			0	0	0	0	0	0	0	0.000209	0	0	0	0	0	0	0	0	0	0	0.000289	0	0	0	0
S(94)			0	0	0	0	0	0	0	0	0	0	0	0	0	0	0	0	0	0	0	0	0.000215	0	0.000136
A(81)			0	0	0.00039	0	0	0	0	0	0	0	0	0	0	0	0	0	0	0	0	0	0.000215	0	0
R(101)			0	0	0	0	0	0	0	0.000209	0	0	0	0	0	0	0	0	0	0.001416	0	0	0	0	0
C(33)			0	0	0	0	0.004065	0	0.000155	0	0	0	0	0	0	0	0	0	0	0	0	0	0	0	0
W(75)			0	0	0	0	0	0.001706	0	0	0	0.003774	0	0	0	0	0	0	0	0	0	0	0	0	0
G(78)			0	0	0	0	0	0	0.000155	0	0	0	0	0	0	0	0	0	0	0	0	0	0.000215	0	0
F(26)			0	0	0	0	0	0	0	0	0	0	0	0	0	0.015385	0	0	0	0	0	0	0	0	0
L(29)			0	0	0	0	0	0	0	0	0	0.003774	0	0	0	0	0.003413	0	0	0	0	0	0	0	0
S(173)			0	0	0	0	0	0	0	0	0	0	0	0	0	0	0	0	0	0	0	0	0	0	0.000272
T(30)			0	0	0	0	0	0	0	0	0	0	0	0	0	0	0	0	0	0	0	0	0.00043	0	0
W(31)			0	0	0	0	0	0	0	0	0	0	0	0.003115	0	0	0	0	0	0.001416	0	0	0	0	0
I(52)			0	0	0	0	0	0	0	0	0	0	0	0.003115	0	0	0	0	0	0	0	0	0.000215	0	0
S(136)			0	0	0	0	0	0	0	0	0	0	0	0.003115	0	0	0	0	0	0	0	0	0	0	0.000136
G(79)			0	0	0	0	0	0	0	0	0	0	0	0	0	0	0	0	0	0	0	0	0.000215	0	0
F(100)			0	0	0	0	0	0	0	0	0	0	0	0	0	0	0	0	0	0	0	0	0.000215	0	0
L(62)			0	0	0.00039	0	0	0	0	0	0	0	0	0	0	0	0	0	0	0	0	0	0	0	0
I(128)			0	0	0	0	0	0	0	0	0	0	0	0	0	0	0	0	0	0	0	0	0	0	0.000136
P(132)			0	0	0	0	0	0	0.000155	0	0	0	0	0	0	0	0	0	0	0	0	0	0	0	0
N(74)			0	0	0	0	0	0	0	0	0	0	0	0	0	0	0	0	0	0	0	0	0	0	0.000136
M(91)			0	0	0	0	0	0	0	0	0	0	0	0	0	0	0	0	0	0	0.000289	0	0	0	0
L(90)			0	0	0	0	0	0	0	0	0	0	0	0	0	0	0	0	0	0	0.000289	0	0	0	0
A(104)			0	0	0	0	0	0	0	0	0	0	0	0.003115	0	0	0	0	0	0	0	0	0	0	0
A(68)			0	0	0	0	0	0	0	0	0	0	0	0	0	0	0	0	0	0	0	0	0.000215	0	0
M(1)			0	0	0	0	0	0	0.000155	0	0	0	0	0	0	0	0	0	0	0	0	0	0	0	0
K(15)			0	0	0	0	0	0	0	0	0	0	0	0	0.003425	0	0	0	0	0	0	0	0	0	0
L(145)			0	0	0	0	0	0	0	0	0	0	0	0	0	0	0	0.002232	0	0	0	0	0	0	0
V(23)			0	0	0	0	0	0	0	0	0	0	0	0	0	0	0	0.002232	0	0	0	0	0	0	0
R(186)			0	0	0	0	0	0.001706	0	0	0	0	0	0	0	0	0	0	0	0	0	0	0	0	0
E(167)			0	0	0	0	0	0	0	0	0	0	0	0	0	0	0	0	0	0	0	0.000167	0	0	0
A(194)			0	0	0	0	0	0	0	0	0	0	0	0	0	0	0	0	0	0	0	0.000167	0	0	0
A(195)			0	0	0	0	0	0	0.000155	0	0	0	0	0	0	0	0	0	0	0	0	0	0	0	0
L(16)			0	0	0.00039	0	0	0	0	0	0	0	0	0	0	0	0	0	0	0	0	0	0	0	0
R(174)			0	0	0	0	0	0	0	0	0	0	0	0	0	0	0	0	0	0	0	0.000167	0	0	0
I(144)			0	0	0	0	0	0	0.000155	0	0	0	0	0	0	0	0	0	0	0	0	0	0	0	0
I(8)			0	0	0	0	0	0	0	0.000209	0	0	0	0	0	0	0	0	0	0	0	0	0	0	0
S(211)			0	0	0	0	0	0	0	0	0	0	0	0	0	0	0	0	0	0	0.000289	0	0	0	0
E(11)			0	0	0	0	0	0	0	0	0	0	0	0	0	0	0	0	0	0	0	0	0	0	0
N(21)			0	0	0	0	0	0	0	0	0	0	0	0	0	0	0	0	0	0	0	0	0	0	0

## Sheet: South America
	2019-11-30	2019-12-31	2020-01-31	2020-02-29	2020-03-31	2020-04-30	2020-05-31	2020-06-30	2020-07-31	2020-08-31	2020-09-30	2020-10-31	2020-11-30	2020-12-31	2021-01-31	2021-02-28	2021-03-31	2021-04-30	2021-05-31	2021-06-30	2021-07-31	2021-08-31	2021-09-30	2021-10-31	2021-11-30
I(82)			0	0	0	0	0	0.001046	0.001047	0.000924	0	0	0.001871	0	0.004919	0.003974	0.007846	0.015339	0.009032	0.016029	0.114463	0.496394	0.823559	0.9434	0.941416
D(3)			0	0	0.013283	0.009102	0.011607	0.013598	0.006283	0.014787	0	0.006689	0.004677	0.001176	0.000351	0.000852	0	0.000263	0.000537	0.000263	0.000777	0.001005	0.002166	0.003512	0.038405
R(146)			0	0	0	0	0	0	0	0.000924	0	0	0.000935	0.000588	0.000351	0	0.000154	0	0.000715	0.000526	0.007169	0.00804	0.011163	0.006679	0.002604
A(63)			0	0	0	0	0.000893	0	0	0.001848	0	0	0	0	0	0	0.000615	0.000263	0.000358	0.000657	0.001075	0.000946	0.000611	0.000207	0.038568
A(2)			0.016393	0	0.001898	0	0.000893	0.003138	0.004188	0.002773	0.010101	0.003344	0.004677	0.002941	0.00246	0.001703	0.002769	0.00412	0.004829	0.004993	0.002987	0.002365	0.002721	0.003099	0.004801
Q(19)			0	0	0	0	0	0	0	0	0.001263	0	0	0	0.000351	0	0	0.000351	0	0	0	0	5.6e-05	6.9e-05	0.037673
R(44)			0	0	0	0	0	0	0	0.000924	0	0.001115	0.000935	0.000588	0	0	0	0.001052	0.001878	0.002365	0.005257	0.008394	0.001666	0.000344	0.000244
A(40)			0	0	0	0	0.000893	0	0	0.000924	0	0	0	0	0	0	0.000154	0.000175	0.000179	0.000197	0.00239	0.004788	0.005554	0.002754	0.004394
H(125)			0	0	0	0.001214	0	0.001046	0.001047	0.000924	0	0	0.002806	0.001765	0.001757	0.001419	0.000923	0.001315	0.001163	0.001314	0.001314	0.001951	0.003832	0.001377	0.000325
L(29)			0	0	0	0	0	0	0	0	0.001263	0	0	0.001765	0.000351	0.001135	0.000308	0.001052	0.002057	0.002102	0.00233	0.001714	0.000611	0.001446	0.001058
D(209)			0	0	0.001898	0	0	0	0	0	0.001263	0.001115	0.001871	0.002941	0.001757	0.002555	0.000923	0.001139	0.00152	0.001905	0.001613	0.000946	0.001166	0.000344	0.00179
V(70)			0	0	0	0.00182	0	0.004184	0.003141	0	0.001263	0	0	0.002353	0.002108	0.002271	0.000769	0.001665	0.001431	0.001182	0.001494	0.000296	0.000444	0.000413	0.001302
A(69)			0	0	0.000949	0.000607	0	0.001046	0.001047	0.001848	0.001263	0	0	0.001765	0.000351	0.001703	0.001385	0.000789	0.001252	0.000591	0.001255	0.000946	0.000611	0.000895	0.000244
F(28)			0	0	0	0	0	0	0	0	0	0.001115	0	0	0.000351	0	0	0.000351	0	0.000394	0.001314	0.002542	0.002221	0.000138	8.1e-05
M(109)			0	0	0	0.00182	0.001786	0	0	0	0	0.00223	0.000935	0.001176	0.001757	0.000568	0.000615	0.000964	0.000805	0.001445	0.000777	0.000532	0.000167	0.000413	0.000814
S(197)			0	0	0	0	0	0	0	0	0	0	0.000935	0	0	0	0	8.8e-05	0.000179	0.000263	0.000538	0.00136	0.001222	0.001515	0.001546
A(85)			0	0	0	0	0	0	0.001047	0.001848	0.001263	0.001115	0.001871	0	0.001054	0.000852	0.000462	0.000526	0.000715	0.001117	0.000538	0.000296	0.000333	0.000275	0.001221
T(175)			0	0	0.002846	0.000607	0	0	0	0	0	0	0	0	0	0	0	0.000175	0.000268	0.000263	0.000179	0.000236	0.001444	0.002203	0.000244
C(33)			0	0	0	0	0	0	0	0.000924	0	0	0	0	0	0.000284	0	0.001139	0.000358	0.001117	0.000538	0.000591	0.000778	0.000551	0.000163
L(17)			0	0	0	0.000607	0	0	0	0	0	0.001115	0.003742	0.000588	0.001054	0.001135	0.001231	0.000526	0.000626	0.000854	0.000657	0.000355	0.000222	0.000207	0.00057
V(23)			0	0	0	0	0	0.002092	0.003141	0	0.003788	0	0.000935	0.000588	0.001054	0.000852	0.000154	0.000526	0.000358	0.00046	0.000717	0.000296	0.0005	0.000413	0.000488
K(162)			0	0	0	0	0	0	0	0	0.001263	0	0	0	0	0.000568	0.000308	0.000877	0.000715	0.000723	0.001075	0.000473	0.000333	6.9e-05	0.000325
H(155)			0	0	0	0	0.000893	0.001046	0.001047	0	0.001263	0.001115	0	0	0.001054	0.001135	0.000462	0.000438	0.000179	0.00046	0.001016	0.000296	0.000167	0.000551	0.000407
C(86)			0.032787	0	0	0.000607	0.000893	0	0	0	0	0.001115	0	0	0.000351	0.000568	0.000308	0.000614	8.9e-05	0.000197	0.000299	0.000355	0.0005	0.001377	0.000325
G(6)			0	0	0	0	0	0	0	0	0	0	0.000935	0.000588	0	0.000568	0.001385	0.001052	0.000715	0.000723	0.000777	0.000177	5.6e-05	6.9e-05	0.000163
I(201)			0	0	0	0	0	0	0	0	0	0	0	0	0	0	0	0.000351	0.001073	0.001445	0.000956	0.000355	0.000222	0	0
S(4)			0	0	0	0.001214	0.001786	0.001046	0.001047	0	0	0	0.000935	0.001176	0	0.000284	0.000923	0.000351	0.000358	0.000394	0.000239	0.000296	0.000555	0.000413	0.00057
R(158)			0	0	0	0	0	0	0.002094	0	0	0	0	0	0	0	0.000308	0.000175	0.000179	0.00046	0.000179	0.000591	0.000944	0.001033	8.1e-05
L(34)			0	0	0	0	0	0.001046	0	0	0.001263	0	0.000935	0.000588	0	0.000568	0	0.000964	0.000626	0.000657	0.000597	0.000355	5.6e-05	0.000138	0.000325
I(24)			0	0	0	0	0	0	0	0	0	0	0	0.000588	0	0.000852	0.001077	8.8e-05	0.000715	0.001248	0.000597	0.000118	0.000167	6.9e-05	0
A(81)			0	0	0	0	0	0	0	0	0.001263	0	0	0	0.000351	0	0.000154	0.000526	0.000894	0.000197	0.000597	0.00065	0.000222	0.000344	8.1e-05
T(208)			0	0	0	0	0	0	0.001047	0	0	0	0.000935	0	0.000351	0	0.000154	0.000701	0.000447	0.000131	0.000239	0.000236	0.000444	0.000757	0.000488
S(94)			0	0	0	0	0	0	0	0	0	0	0	0	0	0	0	0.000175	0.000268	6.6e-05	0.000299	0.000118	0.000889	0.000757	0.000976
M(84)			0	0	0	0	0	0	0	0	0	0	0.000935	0.000588	0.001054	0.000568	0	0.000526	0.000715	0.00092	0.000657	0.000236	5.6e-05	6.9e-05	0
A(98)			0	0	0	0	0	0	0	0	0.001263	0.00223	0	0.001176	0.003514	0.001703	0.000308	0.000701	0.000268	0.000131	0.000239	0.000532	0	6.9e-05	8.1e-05
A(104)			0	0	0	0	0	0	0	0	0.001263	0	0	0	0.000703	0	0.002	0	0.000626	0.000328	0.000538	0.000591	5.6e-05	0	0.000163
I(76)			0	0	0	0	0	0	0	0	0	0	0	0	0.000351	0.000568	0.000154	0.000351	0.000984	0.00046	0.000358	0.000236	0.000389	0.000344	8.1e-05
A(38)			0	0	0	0	0	0	0	0	0	0.001115	0	0.000588	0	0	0.000615	0.000351	0.000537	0.000131	0.000299	0.000236	0.000611	0.000275	8.1e-05
A(142)			0	0	0	0	0	0	0	0	0	0.001115	0	0	0.000703	0	0.000615	0.000175	0.000894	0.000263	0.000119	0.000177	0.000222	0.000344	0.000488
R(107)			0	0	0	0	0	0	0	0.000924	0	0	0.003742	0	0	0.000284	0	0.000351	0.000179	0.00046	0.000358	0.000236	0.000278	0.000275	0.000244
H(148)			0	0	0	0	0.000893	0	0	0	0	0	0	0	0	0	0	0.001227	0.000358	0.000263	0.000358	0.000118	0.000222	0.000275	0.000163
L(93)			0	0	0	0	0	0	0	0	0	0	0	0	0	0	0.000308	0.000175	0	0	0	0	0.000167	0.001515	0.000976
A(83)			0	0	0	0	0	0	0.001047	0	0	0.001115	0	0	0.000351	0	0	0.000263	0.000447	0.000131	0.000538	0.000355	0.000278	0.000138	0.000407
V(66)			0	0	0	0	0.000893	0	0	0.007394	0	0	0	0.001176	0	0.000284	0.000154	0	0.000179	0.000526	0.000538	0.000296	0.000111	0	0
W(75)			0	0	0	0	0	0	0	0	0	0	0.000935	0.000588	0.000351	0.000284	0.000923	0.000438	0.000447	0.000526	0.000299	0.000236	0	6.9e-05	0
G(78)			0	0	0	0.001214	0.002679	0.004184	0.002094	0	0	0	0	0	0.00246	0	0.000154	8.8e-05	0.000537	6.6e-05	6e-05	5.9e-05	0.000167	0.000275	0.000163
L(46)			0	0	0	0	0	0	0	0.001848	0	0.001115	0	0	0	0	0	8.8e-05	0	6.6e-05	0.000538	0.000828	0.000222	0.000207	8.1e-05
K(15)			0	0	0	0	0	0	0	0	0	0	0	0	0	0.000568	0.000154	0	8.9e-05	0.000328	0.000657	0.000236	0.000333	0.000207	0
C(64)			0	0	0	0.000607	0.000893	0	0	0	0	0.001115	0	0	0.000703	0	0.000154	0.000701	0.000358	0	0.000358	0.000177	5.6e-05	0.000275	8.1e-05
T(7)			0	0	0	0	0	0	0.001047	0	0	0	0	0.000588	0.000351	0.000568	0	0.000351	8.9e-05	0.000328	0.000239	0.000118	0.000222	0.000275	0.000325
S(214)			0	0	0	0	0	0	0	0.000924	0	0.001115	0.000935	0	0	0	0.000462	0.000438	0.000179	0.000263	0.000179	5.9e-05	5.6e-05	0.000207	0.00057
G(126)			0	0	0	0	0	0	0	0	0	0	0	0	0	0	0	8.8e-05	0	0.000131	0.000179	0.00065	0.000555	0.000207	8.1e-05
V(10)			0	0	0	0	0.000893	0	0	0	0	0	0	0	0	0.000568	0.000308	0	8.9e-05	0.000526	0.000418	0.000296	0.000222	0	8.1e-05
A(188)			0	0	0	0.000607	0	0	0	0	0	0	0	0	0	0.000284	0.000154	0.000263	0.000447	0.000197	0.000418	5.9e-05	0.000167	6.9e-05	8.1e-05
H(210)			0	0	0	0	0	0	0	0	0	0	0	0	0	0	0.000154	0.000263	0.000626	0.00046	0.000119	0	5.6e-05	0	8.1e-05
T(30)			0	0	0	0	0	0	0	0	0	0	0	0	0	0	0	8.8e-05	0	0.000131	6e-05	0.000177	0.000278	0.000344	0.000407
V(60)			0	0	0	0	0	0	0	0	0	0	0	0.003529	0.002108	0.000284	0	0	0.000179	0	0.000179	0	5.6e-05	0	0.000163
R(101)			0	0	0	0	0	0	0	0	0	0	0	0	0.000351	0	0.000154	0.000263	0.000715	0.000394	0.000119	0	0	0	0
S(136)			0	0	0	0.000607	0	0	0	0	0	0	0	0	0.000351	0.000568	0.000308	0	8.9e-05	0	6e-05	5.9e-05	5.6e-05	0.000207	0.00057
T(77)			0	0	0	0	0	0	0.001047	0	0	0	0.000935	0	0	0	0	0.000263	0.000179	0.000263	0.000239	5.9e-05	0.000111	6.9e-05	0
L(87)			0	0	0	0	0	0	0	0.000924	0	0	0	0.000588	0.000703	0	0.000308	0.000175	8.9e-05	0	0.000179	0.000236	5.6e-05	6.9e-05	0
F(100)			0	0	0	0	0	0	0	0	0	0	0.000935	0	0.000351	0	0	0	0.000268	0.000131	0.000239	0.000355	5.6e-05	0	0
W(31)			0	0	0	0	0	0	0	0	0	0	0	0	0	0.000284	0	0	0.000447	0.000131	0.000179	0	0.000167	6.9e-05	0.000244
S(173)			0	0	0	0	0	0	0	0	0	0	0	0	0	0	0.000154	8.8e-05	8.9e-05	6.6e-05	0.000119	0.000355	0.000111	6.9e-05	0.000244
I(73)			0	0	0	0	0	0	0	0	0	0	0	0	0	0	0.000154	0.000263	0	6.6e-05	0.000538	0.000177	0	6.9e-05	0
P(132)			0	0	0.000949	0	0	0	0	0	0	0	0	0.001176	0.001405	0.001703	0	0	0	0	0	5.9e-05	5.6e-05	0.000138	0
N(43)			0	0	0	0	0	0	0	0	0	0	0.000935	0	0.000351	0.000284	0	0	0.000179	0	6e-05	0.000177	5.6e-05	0.000275	8.1e-05
I(151)			0	0	0	0.000607	0	0	0	0.000924	0	0	0	0	0	0	0	0	0	0	0.000239	0.000118	0.000167	0.000275	0
A(68)			0	0	0	0	0	0	0.001047	0	0	0	0.000935	0	0	0.000284	0	0	8.9e-05	0.000197	0.000119	0.000177	0.000111	6.9e-05	0
L(16)			0	0	0	0	0	0	0	0	0.001263	0	0	0	0	0.000284	0	0	0.000179	0.000328	0.000179	0.000118	0	0	0
M(91)			0	0	0	0	0	0	0	0	0	0	0	0	0	0	0	0	0.000179	0	0	0	0.000389	6.9e-05	0.000325
E(167)			0	0	0	0	0	0.001046	0	0	0	0	0	0	0.000703	0	0	0.000175	8.9e-05	6.6e-05	0	0	0.000167	0.000207	0
I(168)			0	0	0	0	0	0	0	0	0.001263	0	0	0	0	0	0	0.000175	8.9e-05	0	6e-05	0.000177	0.000222	6.9e-05	0
N(207)			0	0	0	0	0	0	0	0	0	0	0	0	0	0	0	0	0	0	0.000239	0.000236	5.6e-05	0.000138	8.1e-05
F(26)			0	0	0	0	0	0	0	0	0	0	0.000935	0.000588	0.000351	0.000284	0.000308	8.8e-05	0	0	6e-05	0.000177	0	6.9e-05	0
P(123)			0	0	0	0	0	0	0	0	0	0	0	0	0	0	0.000154	0	0	0.000263	0.000119	0.000296	0	0	0
L(124)			0	0	0	0	0	0	0	0	0	0	0	0.001176	0	0.000284	0	8.8e-05	0.000179	0	0.000239	0	5.6e-05	6.9e-05	0
G(89)			0	0	0	0	0	0	0	0	0	0	0	0	0	0	0	0	0.000537	6.6e-05	0	5.9e-05	0	6.9e-05	0.000244
D(160)			0	0	0	0	0	0	0	0	0	0	0	0.000588	0.000351	0.000284	0	8.8e-05	0.000179	6.6e-05	0.000119	0	5.6e-05	0.000138	0
I(52)			0	0	0	0	0	0	0.001047	0	0	0	0	0	0	0.000284	0	8.8e-05	0.000358	0	0.000119	5.9e-05	0	6.9e-05	8.1e-05
I(97)			0	0	0	0	0	0	0	0	0	0	0	0	0.000351	0	0	0	8.9e-05	0.000131	0.000179	0.000177	5.6e-05	0	8.1e-05
V(88)			0	0	0	0	0	0	0	0	0	0.001115	0	0	0	0.000284	0	0	0	0.000263	0	0	0.000167	6.9e-05	0
I(49)			0	0	0	0	0	0	0	0	0	0	0	0	0	0	0.000154	0.000175	8.9e-05	0.000131	0.000179	5.9e-05	0	0	0
G(79)			0	0	0	0	0	0	0	0	0	0	0	0	0	0	0.000154	8.8e-05	8.9e-05	0.000263	6e-05	0	0	6.9e-05	0
D(163)			0	0	0	0	0	0	0	0	0	0	0	0	0	0	0.000154	8.8e-05	8.9e-05	0	0.000119	0.000118	0.000111	0	0
I(161)			0	0	0	0	0	0	0	0	0	0	0	0	0.000703	0	0	0.000175	0.000179	6.6e-05	0	0	0	6.9e-05	8.1e-05
F(45)			0	0	0	0	0	0	0	0	0	0	0	0	0	0	0	8.8e-05	8.9e-05	0.000263	0	0.000118	5.6e-05	0	0
R(186)			0	0	0	0.001214	0	0	0	0	0	0	0	0	0	0	0.000154	0	0	0	0	5.9e-05	5.6e-05	0.000207	0
D(190)			0	0	0	0	0	0	0	0	0	0	0	0	0	0	0	0	8.9e-05	6.6e-05	0.000119	5.9e-05	0.000111	0	8.1e-05
E(11)			0	0	0	0	0	0	0	0	0	0	0	0	0	0	0	8.8e-05	0	0	6e-05	0.000118	0.000167	0	8.1e-05
S(212)			0	0	0	0	0	0	0	0	0	0	0	0	0	0	0	0	0.000179	6.6e-05	0.000119	5.9e-05	0	0	0.000163
L(90)			0	0	0	0	0	0	0	0	0	0	0	0	0.000351	0	0	0	0	0	0.000179	0.000177	0	0	8.1e-05
Q(185)			0	0	0	0	0	0	0	0	0	0	0	0	0	0	0	8.8e-05	0	0	0	5.9e-05	5.6e-05	0.000207	0.000163
R(131)			0	0	0	0	0	0	0	0	0	0	0	0	0.000703	0	0	0	0	6.6e-05	0.000179	5.9e-05	0	6.9e-05	0
I(128)			0	0	0	0	0	0	0	0	0	0.001115	0	0	0	0	0	8.8e-05	0	0.000197	6e-05	0	5.6e-05	0	0
A(194)			0	0	0	0	0	0	0	0	0	0	0.000935	0	0	0.000568	0.000154	0	0	0	0	5.9e-05	0	0	0.000163
N(74)			0	0	0	0	0	0	0	0	0	0	0	0	0	0	0	0	8.9e-05	0	0.000179	0	0.000167	0	0
L(129)			0	0	0	0	0	0	0	0	0	0	0	0.000588	0	0	0	8.8e-05	0	0	0	5.9e-05	0.000167	6.9e-05	0
I(48)			0.016393	0	0	0	0	0	0	0	0	0	0	0	0.000703	0	0	0	0	0	0	0.000177	0	6.9e-05	0
I(144)			0	0	0	0	0	0	0	0	0	0	0	0	0	0.000568	0	0.000175	8.9e-05	0	0	0	0	6.9e-05	0
