# Supplementary material for: Mutations in SARS-CoV-2 structural proteins: a global analysis
Source: Virol J. 2022 Dec 18;19:220. doi: 10.1186/s12985-022-01951-7 (PMC9759450; doi:10.1186/s12985-022-01951-7)
Supplement: Supplementary file 7 — Additional file 7: Evolutionary trends of the N protein mutation distribution based on the time and geographical areas. [file 12985_2022_1951_MOESM7_ESM.xlsx]

## Sheet: Total
	2019-11-30	2019-12-31	2020-01-31	2020-02-29	2020-03-31	2020-04-30	2020-05-31	2020-06-30	2020-07-31	2020-08-31	2020-09-30	2020-10-31	2020-11-30	2020-12-31	2021-01-31	2021-02-28	2021-03-31	2021-04-30	2021-05-31	2021-06-30	2021-07-31	2021-08-31	2021-09-30	2021-10-31	2021-11-30
R(203)		0	0.352038	0.072993	0.194402	0.339687	0.372315	0.459862	0.528083	0.538028	0.366408	0.260257	0.222357	0.291263	0.522191	0.599577	0.766075	0.859708	0.92165	0.949045	0.974707	0.987732	0.996695	0.998039	0.998434
D(377)		0	0.005666	0.000608	0.001976	0.003719	0.002482	0.002252	0.004198	0.028827	0.025339	0.022338	0.029694	0.033574	0.1369	0.03175	0.026323	0.038323	0.140028	0.578488	0.886232	0.961215	0.988361	0.993757	0.996303
D(63)		0	0.000183	0	0.000156	0.000366	0.000853	0.000381	0.002221	0.001034	0.000711	0.000447	0.000904	0.000862	0.107143	0.002955	0.003606	0.02397	0.135566	0.571932	0.870544	0.951901	0.987313	0.990718	0.99305
G(215)		0	0.000731	0	9.8e-05	0.000328	0.001008	0.000866	0.002519	0.001579	0.001911	0.001236	0.001713	0.001218	0.100141	0.002165	0.002142	0.008611	0.093021	0.466369	0.7293	0.829814	0.904544	0.940108	0.965704
G(204)		0	0.35149	0.072993	0.192896	0.338916	0.371733	0.458511	0.5244	0.535007	0.36305	0.258976	0.220548	0.289636	0.413644	0.595229	0.757165	0.828803	0.784144	0.371544	0.088398	0.020193	0.004963	0.002006	0.001237
D(3)		0	0.115884	0.000608	0.00045	0.000732	0.000931	0.00045	0.001327	0.000871	0.001715	0.002621	0.025236	0.138752	0.308456	0.501081	0.676599	0.725541	0.68344	0.278655	0.052694	0.008883	0.001157	0.000537	0.000505
S(235)		0	0.115518	0.000608	0.000333	0.000964	0.002908	0.005925	0.005362	0.006098	0.009361	0.007535	0.028034	0.139433	0.307861	0.500229	0.675262	0.724788	0.683178	0.279037	0.052671	0.008607	0.000941	0.000379	0.000156
Q(9)		0	0.001828	0.000608	0.000235	0.000983	0.002598	0.000693	0.002058	0.002586	0.002353	0.010291	0.008894	0.008796	0.010966	0.004352	0.00222	0.001074	0.001212	0.003467	0.053618	0.054456	0.057397	0.071561	0.093846
A(220)		0	0.230854	0.003041	0.000313	0.000424	0.000698	0.003257	0.00631	0.06035	0.231627	0.365441	0.320417	0.251653	0.120737	0.079174	0.020134	0.004539	0.002968	0.001787	0.000809	0.000153	0.000203	0.000319	0.000272
P(199)		0	0.050448	0.004866	0.001506	0.001657	0.002792	0.021827	0.052429	0.057927	0.067905	0.081476	0.14499	0.153388	0.126894	0.114855	0.068024	0.040651	0.016535	0.00583	0.001488	0.001076	0.001222	0.00132	0.001529
M(234)		0	0.052276	0.001217	0.000919	0.003161	0.003916	0.003603	0.012864	0.060595	0.075992	0.083322	0.099412	0.109595	0.096301	0.082706	0.069044	0.063859	0.030498	0.011262	0.004522	0.00163	0.001101	0.001339	0.001121
T(205)		0	0.005301	0.002433	0.002171	0.003874	0.01361	0.01327	0.016628	0.01342	0.021393	0.017558	0.02248	0.049828	0.070096	0.079386	0.084824	0.062042	0.040284	0.033209	0.017355	0.004806	0.003014	0.001954	0.001877
P(67)		0	0.033084	0.001217	0.000411	0.000597	0.000504	0.019333	0.046878	0.045677	0.053324	0.061192	0.121466	0.129532	0.109982	0.09402	0.045641	0.01151	0.002772	0.001049	0.000531	0.000522	0.000692	0.00092	0.001728
P(80)		0	0.000183	0	0.000411	0.000251	0.000349	0.000346	0.00019	0.000299	0.000539	0.000447	0.000457	0.001528	0.002912	0.009888	0.025773	0.065817	0.077646	0.080294	0.031987	0.009476	0.00377	0.001946	0.001331
S(194)		0	0.037105	0.012165	0.007648	0.019831	0.040946	0.075217	0.072063	0.102978	0.110912	0.110545	0.129542	0.109315	0.064151	0.042083	0.015689	0.005677	0.004672	0.005006	0.002108	0.001278	0.001243	0.00139	0.001379
S(327)		0	0.000731	0.001217	0.000763	0.000694	0.001202	0.000901	0.000894	0.000544	0.000564	0.000968	0.001287	0.00183	0.00497	0.002402	0.002502	0.001988	0.002706	0.015948	0.022207	0.017431	0.017652	0.017084	0.01494
G(18)		0	0.000183	0	0.000254	0.000771	0.001822	0.000346	0.001002	0.001279	0.001201	0.00073	0.000479	0.000734	0.001184	0.000773	0.00151	0.001633	0.002051	0.004887	0.014689	0.016189	0.015442	0.010354	0.006862
P(13)		0	0.007311	0.004258	0.015022	0.016805	0.017642	0.0088	0.00677	0.006778	0.006813	0.010722	0.012501	0.009568	0.008167	0.010191	0.015467	0.020234	0.016751	0.013253	0.005208	0.002267	0.002184	0.002602	0.002185
A(208)		0	0.000548	0	0.004107	0.003662	0.00159	0.000589	0.000704	0.001715	0.000441	0.000536	0.000617	0.000923	0.001553	0.001197	0.001528	0.001442	0.001632	0.001365	0.008498	0.011329	0.012818	0.012215	0.011032
A(376)		0	0.042223	0.001217	0.000117	5.8e-05	0.000116	0.000346	0.000704	0.029671	0.052442	0.062771	0.058589	0.047998	0.037416	0.024572	0.005945	0.000966	0.000252	0.000292	0.001097	0.000199	0.000236	0.000527	0.000577
S(202)		0	0.005118	0.008516	0.008137	0.005608	0.014036	0.00641	0.007718	0.005499	0.007156	0.001623	0.003085	0.005272	0.005734	0.00751	0.010662	0.014665	0.009508	0.002607	0.000578	0.000647	0.001822	0.004952	0.012461
P(365)		0	0.013526	0.003041	0.000176	0.000463	0.000969	0.000762	0.001706	0.006887	0.022692	0.01933	0.021927	0.035216	0.020603	0.012244	0.005385	0.003873	0.003483	0.003215	0.002666	0.001874	0.004003	0.004978	0.004973
T(135)		0	0.002559	0.000608	0.000196	0.000173	0.001202	0.000832	0.001679	0.001633	0.002034	0.003455	0.005203	0.008282	0.006746	0.004954	0.003401	0.004006	0.007971	0.00243	0.002039	0.002455	0.004066	0.005654	0.006377
K(373)		0	0	0.000608	0.000411	0.000424	0.001086	0.001524	0.000894	0.001279	0.000907	0.000506	0.001255	0.002012	0.001045	0.000831	0.000894	0.000566	0.001101	0.007309	0.005906	0.007124	0.005931	0.00639	0.006459
P(383)		0	0.000731	0.001217	0.000958	0.001503	0.001435	0.009805	0.00956	0.003212	0.002598	0.003395	0.005681	0.005544	0.006249	0.006833	0.006468	0.008334	0.010687	0.005388	0.002967	0.00235	0.002594	0.0025	0.00201
P(151)		0	0.010784	0	0.000215	0.000231	0.001047	0.012854	0.059308	0.078288	0.021148	0.009293	0.008607	0.007511	0.007071	0.004422	0.00307	0.002282	0.002811	0.001822	0.001617	0.001622	0.003104	0.002725	0.003131
S(412)		0	0.000914	0	0	0.000135	0.000775	0.000797	0.000108	5.4e-05	0.000613	0.000328	0.000798	0.000756	0.000537	0.000511	0.000267	0.000209	0.000498	0.000698	0.00226	0.010093	0.009787	0.006882	0.002727
L(139)		0	0.000366	0	0.001213	0.000443	0.000775	0.002633	0.000948	0.00098	0.001103	0.000983	0.001692	0.002821	0.003727	0.003554	0.005844	0.005898	0.004357	0.005353	0.004717	0.002784	0.002865	0.003044	0.00257
V(270)		0	0	0	0.000176	0.000116	0.00031	0.000866	0.001219	0.00147	0.001029	0.000834	0.000989	0.000945	0.001326	0.001234	0.000857	0.001449	0.00155	0.00112	0.001147	0.001704	0.00324	0.006759	0.009999
T(362)		0	0.004387	0	7.8e-05	0.000713	0.000969	0.001282	0.000975	0.001334	0.001789	0.002264	0.002053	0.002246	0.002419	0.004348	0.004315	0.003981	0.003784	0.003716	0.003053	0.002691	0.003215	0.003453	0.004192
R(385)		0	0.008774	0	7.8e-05	0.000173	0.000233	0.000485	0.000135	0.007186	0.014042	0.010767	0.004979	0.002836	0.003172	0.001717	0.000927	0.005611	0.008351	0.009376	0.005583	0.002789	0.001725	0.001679	0.001021
Q(418)		0	0.000548	0.003041	0.000196	0.000424	0.000698	0.000208	0.000352	0.000272	0.000343	0.000194	0.001245	0.001551	0.003804	0.007448	0.012563	0.01273	0.006444	0.0014	0.000633	0.001108	0.001013	0.001296	0.001135
T(391)		0	0.001279	0.001217	0.000156	0.000578	0.000271	0.000589	0.001923	0.003239	0.003921	0.007178	0.015554	0.017736	0.01199	0.009859	0.003878	0.001769	0.001111	0.002524	0.002566	0.001048	0.001043	0.001022	0.001271
P(207)		0	0.001097	0.000608	0.000235	0.000482	0.002133	0.001213	0.004712	0.006098	0.004583	0.005585	0.010065	0.012003	0.008346	0.00409	0.001414	0.000408	0.000495	0.001022	0.001588	0.001798	0.002249	0.003037	0.004191
A(152)		0	0.002925	0	0.000137	0.00106	0.000931	0.000589	0.000433	0.000572	0.005122	0.000551	0.000894	0.001029	0.001341	0.001492	0.001741	0.002287	0.00265	0.002489	0.004378	0.002987	0.003484	0.003938	0.00416
T(366)		0	0.000183	0	9.8e-05	0.000906	0.001745	0.002668	0.00111	0.001715	0.001201	0.001028	0.001489	0.002776	0.002854	0.002963	0.002772	0.003422	0.004167	0.003668	0.001744	0.001288	0.001991	0.002873	0.005111
A(398)		0	0.006397	0	0.000333	0.000597	0.000504	0.000797	0.00176	0.018211	0.028328	0.021296	0.01265	0.005612	0.002587	0.002722	0.003981	0.004854	0.003103	0.00241	0.000749	0.000801	0.001016	0.001447	0.001731
D(401)		0	0.004021	0	0.000411	0.002024	0.003335	0.002702	0.002519	0.003076	0.00299	0.003976	0.006032	0.009296	0.008401	0.009497	0.006986	0.005649	0.002916	0.001483	0.000449	0.000739	0.001023	0.00074	0.00046
A(119)		0	0.001097	0	0.001897	0.000867	0.001745	0.00097	0.00065	0.001089	0.001544	0.002279	0.004362	0.006996	0.007685	0.00781	0.003645	0.001497	0.000888	0.001377	0.001086	0.001077	0.001463	0.002805	0.003509
A(211)		0	0.003107	0.00365	0.000176	0.00079	0.001008	0.002321	0.002058	0.004138	0.003014	0.005689	0.005617	0.00869	0.007323	0.006372	0.00444	0.003412	0.004167	0.002962	0.001492	0.001275	0.001161	0.001386	0.001018
S(187)		0	0.00457	0.003041	0.000293	0.000655	0.000194	0.001732	0.006147	0.008085	0.006543	0.004602	0.003543	0.003237	0.004078	0.005919	0.010338	0.010881	0.004783	0.000686	0.000185	8.6e-05	0.00014	0.000369	0.000375
S(232)		0	0	0	0.000176	0.000578	0.000698	0.000624	0.000217	0.000163	0.000221	0.000119	0.000106	0.000166	0.000216	0.000108	0.000503	0.000669	0.000698	0.001874	0.001311	0.002618	0.002592	0.005752	0.006368
A(90)		0	0.002742	0	0.000293	0.000366	0.000388	0.000416	0.000623	0.000599	0.001078	0.002532	0.009128	0.01009	0.006355	0.00251	0.001508	0.001439	0.001609	0.001436	0.001284	0.001812	0.002696	0.003036	0.002605
T(379)		0	0.000183	0.000608	0.000254	0.000347	0.000853	0.003257	0.002464	0.001388	0.001544	0.001623	0.00333	0.003903	0.003216	0.002361	0.002015	0.002476	0.002493	0.002509	0.001286	0.001123	0.001999	0.002881	0.003882
S(193)		0	0.001645	0.000608	0.006885	0.006071	0.003257	0.003915	0.005254	0.006016	0.004166	0.002353	0.002607	0.002829	0.003088	0.003267	0.001559	0.000959	0.001039	0.00101	0.001296	0.001699	0.00227	0.003103	0.003565
H(300)		0	0.000731	0	0.000254	0.000578	0.000659	0.000728	0.001029	0.001524	0.002107	0.002889	0.00183	0.001354	0.001699	0.001974	0.002186	0.002197	0.001995	0.001605	0.001095	0.001296	0.001911	0.004132	0.004545
Q(389)		0	0.000731	0	0.000137	0.000366	0.000465	0.000312	0.001246	0.001361	0.001495	0.003291	0.004745	0.007253	0.007239	0.007934	0.004839	0.003057	0.003368	0.001728	0.000918	0.000815	0.000895	0.001192	0.000889
M(210)		0	0.002925	0.003041	0.000156	0.000366	0.000582	0.000485	0.000812	0.00166	0.006518	0.005912	0.004181	0.006134	0.004144	0.003329	0.001927	0.001427	0.001271	0.002434	0.004896	0.001554	0.001066	0.001268	0.001391
S(183)		0	0.007128	0	0.002347	0.003218	0.007212	0.018986	0.033364	0.014863	0.021173	0.007967	0.01315	0.006089	0.002492	0.000773	0.00021	8.1e-05	0.000108	0.000753	0.00021	0.000239	0.000871	0.002091	0.002998
G(238)		0	0.002193	0	0.000528	0.000501	0.001551	0.004192	0.002464	0.001769	0.00098	0.001162	0.001724	0.002451	0.00224	0.002228	0.000834	0.00074	0.000767	0.001369	0.002008	0.002106	0.003331	0.003283	0.002439
P(326)		0	0.000366	0.000608	0.000254	0.000385	0.001008	0.000346	0.000677	0.000599	0.000613	0.001102	0.001223	0.001974	0.001747	0.002515	0.004012	0.003767	0.00364	0.002075	0.001015	0.000897	0.001598	0.002053	0.002588
A(12)		0	0.000914	0	5.9e-05	0.000251	0.000155	0.000381	0.022288	0.014944	0.002769	0.001117	0.001021	0.001906	0.001875	0.002402	0.002026	0.001548	0.001432	0.000899	0.000491	0.001741	0.00227	0.00249	0.002727
L(230)		0	0	0.000608	0.000137	7.7e-05	0.000349	0.002113	0.005037	0.000544	9.8e-05	0.000149	9.6e-05	0.000492	0.000888	0.000844	0.000588	0.000798	0.000704	0.00073	0.001301	0.001794	0.003041	0.003299	0.004652
R(209)		0	0.002376	0.000608	0.000509	0.002313	0.0076	0.011468	0.009478	0.00754	0.005489	0.004929	0.004756	0.003714	0.002686	0.002415	0.001308	0.000956	0.000898	0.002489	0.005025	0.001888	0.001054	0.001156	0.000844
S(413)		0	0.000731	0	0.000215	0.000173	0.00031	0.000277	0.000406	0.000735	0.002475	0.001266	0.001245	0.001898	0.001798	0.001301	0.00122	0.001907	0.003833	0.002694	0.001267	0.001111	0.002023	0.002197	0.003108
R(14)		0	0.000183	0	5.9e-05	0.000405	0.000698	0.000485	0.000298	0.000681	0.00076	0.000923	0.000958	0.000711	0.001692	0.003558	0.003608	0.003717	0.003394	0.002331	0.001092	0.001102	0.001578	0.001672	0.001506
P(279)		0	0.000731	0.000608	0.000254	0.000116	0.00031	0.000243	0.000352	5.4e-05	0.000441	0.000462	0.000798	0.001036	0.002046	0.002968	0.002474	0.00268	0.002795	0.00211	0.001348	0.000958	0.001469	0.002012	0.002329
P(6)		0	0.000183	0	0.000372	0.000385	0.000969	0.001975	0.000379	0.000463	0.001029	0.001072	0.001032	0.001301	0.001728	0.002007	0.002121	0.001386	0.000973	0.000785	0.000562	0.001024	0.001817	0.002168	0.003517
R(195)		0	0.003473	0	0.001037	0.000732	0.00318	0.001836	0.002708	0.00313	0.002524	0.004036	0.004873	0.001951	0.002032	0.001596	0.00128	0.002519	0.002693	0.001463	0.001061	0.000941	0.001291	0.001648	0.00178
D(144)		0	0.001097	0	0.000489	0.001233	0.002016	0.001663	0.00306	0.002042	0.002892	0.004125	0.002128	0.003426	0.003625	0.002731	0.001653	0.001656	0.001199	0.000785	0.000899	0.001046	0.001796	0.001518	0.001655
Q(229)		0	0.002376	0	0.000176	0.000289	0.001784	0.000485	0.000677	0.000926	0.001299	0.0007	0.000543	0.000711	0.001133	0.000802	0.000705	0.000883	0.001196	0.001448	0.00169	0.001919	0.002179	0.002374	0.002492
D(402)		0	0.000914	0	0.000333	0.000385	0.000504	0.001594	0.001598	0.003893	0.001201	0.001504	0.002404	0.002473	0.001849	0.001741	0.001464	0.002036	0.00323	0.003211	0.002314	0.001445	0.001157	0.000953	0.000835
G(243)		0	0.000183	0	0.000156	0.000308	0.000698	0.000381	0.000542	0.000572	0.000588	0.001534	0.002841	0.001906	0.001648	0.001983	0.00187	0.001938	0.001563	0.000915	0.001011	0.001211	0.001436	0.001471	0.002234
S(197)		0	0.002559	0.008516	0.028342	0.010407	0.010973	0.004123	0.004279	0.005363	0.002034	0.001876	0.001192	0.00143	0.00167	0.002494	0.002919	0.002441	0.002084	0.001562	0.000982	0.000462	0.000456	0.000341	0.000259
A(156)		0	0.000914	0.002433	0.001056	0.000655	0.00031	0.000139	0.000325	0.000163	0.000172	0.000402	0.000266	0.000363	0.000534	0.001588	0.003455	0.004587	0.004452	0.0023	0.001015	0.000528	0.000798	0.001175	0.000901
A(182)		0	0.001279	0	0.000235	0.00027	0.000388	0.001213	0.000569	0.003348	0.003774	0.002859	0.002426	0.002783	0.00167	0.002111	0.001184	0.000684	0.00093	0.000955	0.000791	0.00087	0.001254	0.001882	0.002187
N(8)		0	0.000548	0.000608	3.9e-05	7.7e-05	0.000233	0.000208	0.000921	0.000735	0.000564	0.000536	0.002426	0.002723	0.001308	0.001417	0.003041	0.005299	0.005055	0.002205	0.000718	0.000471	0.00029	0.000433	0.000404
Q(289)		0	0	0	0.000313	0.000308	0.000892	0.000208	0.0013	0.000844	0.001495	0.000923	0.001287	0.000862	0.000968	0.000615	0.000699	0.00077	0.00077	0.001045	0.001097	0.001104	0.001123	0.001421	0.003577
A(35)		0	0.000366	0.000608	0.000528	0.000694	0.002326	0.001247	0.00111	0.000844	0.001005	0.000998	0.000862	0.001165	0.001652	0.002028	0.001008	0.000785	0.000717	0.000884	0.001072	0.001119	0.001543	0.00166	0.002026
H(145)		0	0.003656	0	0.000137	0.000308	0.001318	0.000728	0.000677	0.00196	0.004877	0.007848	0.007128	0.004145	0.002956	0.002286	0.001774	0.00156	0.002133	0.001128	0.00077	0.000454	0.000518	0.000528	0.000691
P(364)		0	0.000366	0	0.000528	0.00079	0.001202	0.000832	0.002491	0.002096	0.001593	0.004006	0.010362	0.004077	0.003347	0.002369	0.001945	0.000901	0.00093	0.00058	0.000616	0.000638	0.000651	0.000653	0.000799
G(214)		0	0	0	5.9e-05	0.000173	0.000116	0	0.000298	0.000327	0.000245	0.000238	0.000202	0.000582	0.000592	0.000819	0.001362	0.002355	0.003607	0.005877	0.00242	0.001059	0.000763	0.000364	0.000206
G(212)		0	0.002193	0	0.000196	0.000443	0.00159	0.002841	0.003114	0.003022	0.001593	0.002785	0.003468	0.001997	0.001487	0.001131	0.001414	0.002715	0.004354	0.003089	0.00082	0.000422	0.000495	0.000381	0.000303
G(34)		0	0.000366	0	0.000743	0.00079	0.002947	0.001421	0.001598	0.002885	0.00196	0.001742	0.001128	0.002481	0.001666	0.001022	0.000497	0.000574	0.000691	0.000572	0.000868	0.001476	0.00161	0.001507	0.001293
E(378)		0	0.001828	0	0.000313	0.000251	0.000194	0.001455	0.000487	0.000898	0.000441	0.001087	0.0025	0.003426	0.003716	0.005104	0.002595	0.001507	0.00136	0.00155	0.001875	0.00014	8.6e-05	0.000198	0.000338
S(206)		0	0.000366	0	3.9e-05	0.000193	0.001124	0.004158	0.002979	0.003185	0.003798	0.003783	0.008916	0.004863	0.003059	0.003067	0.001202	0.000201	0.000147	0.000367	0.000345	0.000486	0.000723	0.000969	0.001022
G(179)		0	0.000914	0	0.000196	0.000829	0.000582	0.00052	0.000758	0.000299	0.000245	0.000462	0.000468	0.000726	0.000453	0.000391	0.000259	0.000365	0.00036	0.001783	0.001482	0.000957	0.001547	0.002062	0.002084
P(142)		0	0.000366	0	0.000117	0.000173	0.000116	0.000104	0.000677	0.000762	0.000343	0.000611	0.000787	0.000771	0.000957	0.00084	0.000883	0.001736	0.002883	0.001621	0.000805	0.000542	0.000849	0.001119	0.001919
T(334)		0	0.003473	0	0.000352	0.000251	0.001047	0.001767	0.002031	0.001198	0.002107	0.004066	0.003405	0.002519	0.001389	0.001388	0.001906	0.002096	0.001209	0.000564	0.000576	0.00052	0.00082	0.001313	0.000939
S(190)		0	0.001279	0.000608	0.00266	0.002756	0.002753	0.014621	0.023669	0.010208	0.005587	0.005719	0.007628	0.005302	0.003037	0.002535	0.001539	0.000773	0.000488	0.000103	6.7e-05	0.000119	0.000115	0.0001	7.8e-05
P(368)		0	0.000183	0.000608	2e-05	0.000154	0.000349	0.001732	0.001381	0.000408	0.000441	0.00064	0.000457	0.000537	0.000738	0.000657	0.000453	0.000398	0.000347	0.000233	0.000252	0.000329	0.000595	0.003472	0.003038
A(252)		0	0.01645	0.001217	0.000215	0.00054	0.000388	0.000139	0.000379	0.000544	0.001568	0.003917	0.0035	0.000945	0.000771	0.000453	0.000557	0.00079	0.000855	0.000607	0.000518	0.000722	0.001026	0.001714	0.00225
R(32)		0	0.005483	0	0.002562	0.005338	0.007173	0.005439	0.006093	0.005961	0.002181	0.003321	0.002128	0.00211	0.001049	0.001056	0.000829	0.000428	0.0004	0.001329	0.000695	0.000679	0.001246	0.001027	0.000979
T(24)		0	0.000731	0.000608	0.001526	0.000405	0.000388	0.00097	0.001029	0.001143	0.000417	0.000774	0.00117	0.001566	0.001305	0.001272	0.001241	0.001379	0.000973	0.000872	0.000547	0.000849	0.001246	0.001204	0.001166
T(271)		0	0	0	0.000176	0.000347	0.000465	0.000832	0.001327	0.001007	0.000931	0.001117	0.00083	0.00146	0.000822	0.000914	0.001386	0.002916	0.002048	0.00103	0.000676	0.000562	0.000967	0.001007	0.000812
A(414)		0	0.000548	0.000608	0.000274	0.00052	0.000388	0.000173	0.001354	0.003512	0.001176	0.001862	0.002873	0.001308	0.002068	0.002282	0.001697	0.001298	0.001006	0.000817	0.000554	0.000739	0.00083	0.000742	0.000738
G(96)		0	0.000183	0	0	3.9e-05	7.8e-05	0	0.000108	2.7e-05	0.000294	0.000119	0.000138	0.000106	0.001031	0.004938	0.002779	0.000921	0.000491	0.002237	0.001904	0.000595	0.000568	0.000457	0.000355
G(30)		0	0	0	0.003423	0.002563	0.003373	0.003153	0.001435	0.00245	0.001397	0.003842	0.003681	0.005703	0.004973	0.002411	0.000681	0.00034	0.000668	0.000501	0.000225	0.000419	0.000386	0.000308	0.000455
Q(7)		0	0.000731	0	0.000313	0.000193	0.001124	0.001698	0.000731	0.000762	0.001421	0.004066	0.008788	0.004947	0.002244	0.001359	0.000969	0.00042	0.000337	0.000288	0.000341	0.000612	0.000965	0.000774	0.000648
A(251)		0	0.000183	0	0.000509	0.000347	0.001163	0.001282	0.000867	0.000517	0.00098	0.000819	0.000809	0.000613	0.000563	0.000515	0.000414	0.000483	0.000423	0.00086	0.000893	0.001119	0.001488	0.00161	0.001381
A(359)		0	0.000183	0	0.000333	0.000231	0.000155	0.000658	0.000921	0.003729	0.000809	0.001087	0.001489	0.000771	0.000979	0.000781	0.000728	0.000848	0.001189	0.00125	0.000876	0.000604	0.00082	0.001168	0.001343
K(370)		0	0.000183	0	7.8e-05	0.000405	0.000194	0.000104	8.1e-05	2.7e-05	9.8e-05	0.000119	2.1e-05	8.3e-05	0.000219	0.00017	0.000114	0.000151	0.000157	0.000114	0.000131	0.000349	0.001495	0.002478	0.002739
A(173)		0	0.00457	0	2e-05	0.000154	0.000194	0.000173	0.000135	0.000191	0.000221	8.9e-05	0.000298	0.00059	0.000994	0.002261	0.002163	0.001268	0.001635	0.001183	0.000456	0.000525	0.000654	0.000832	0.000803
E(136)		0	0	0	3.9e-05	0.00027	0.000349	0.000416	0.000108	0.000136	0.002402	0.000417	0.000521	0.000446	0.000523	0.000387	0.001264	0.002323	0.002044	0.001077	0.000485	0.000666	0.000729	0.000894	0.00088
V(72)		0	0.006946	0	5.9e-05	0.000154	0.000271	0.001074	0.002789	0.003294	0.002916	0.003723	0.005171	0.003441	0.001568	0.000898	0.000989	0.000883	0.000639	0.000178	0.000169	0.000449	0.000753	0.00078	0.00077
S(2)		0	0	0	3.9e-05	0	7.8e-05	0.000589	0.001733	0.003348	0.002181	0.002398	0.002298	0.004198	0.004363	0.004784	0.002412	0.001029	0.000406	0.000185	8.1e-05	0.0001	2.6e-05	4.2e-05	7.3e-05
K(374)		0	0.000366	0	2e-05	0.000752	7.8e-05	0.000243	0.000352	0.003239	0.002524	0.000745	0.000404	0.000272	0.000311	0.000258	0.00028	0.000393	0.000439	0.00041	0.000541	0.001042	0.001257	0.001178	0.001676
G(236)		0	0.000183	0	0.000156	5.8e-05	0.000271	0.000243	2.7e-05	0.000544	0.000221	0.000253	0.000372	0.000666	0.000888	0.0016	0.001334	0.001608	0.001405	0.001416	0.000556	0.000343	0.000523	0.000761	0.00112
I(292)		0	0.003838	0.006691	0.004166	0.010465	0.016285	0.013408	0.010264	0.008956	0.006568	0.004557	0.003139	0.002035	0.001305	0.000881	0.000482	0.000453	0.000347	0.000162	5.8e-05	0.000106	0.00015	0.000165	0.000263
S(33)		0	0.000731	0	0.000254	0.000732	0.003412	0.001143	0.000758	0.000354	0.001152	0.004259	0.002787	0.002632	0.001838	0.000669	0.000591	0.00044	0.000593	0.000726	0.000375	0.000493	0.000869	0.000799	0.000921

## Sheet: Africa
	2019-11-30	2019-12-31	2020-01-31	2020-02-29	2020-03-31	2020-04-30	2020-05-31	2020-06-30	2020-07-31	2020-08-31	2020-09-30	2020-10-31	2020-11-30	2020-12-31	2021-01-31	2021-02-28	2021-03-31	2021-04-30	2021-05-31	2021-06-30	2021-07-31	2021-08-31	2021-09-30	2021-10-31	2021-11-30
R(203)			0.578947	0.083333	0.138577	0.193353	0.325758	0.414219	0.544186	0.405822	0.3	0.204167	0.183805	0.320119	0.335477	0.379934	0.473969	0.477357	0.56779	0.647216	0.811638	0.947037	0.986807	0.988397	0.993536
D(377)			0	0	0.003745	0	0.003788	0.003091	0.002326	0.001712	0.007143	0.008333	0.003856	0.020813	0.068596	0.01261	0.010314	0.071269	0.298876	0.578174	0.788842	0.937861	0.985752	0.979958	0.929825
D(63)			0	0	0	0	0	0	0.002326	0	0.003571	0	0	0	0.056091	0.007675	0.004912	0.04974	0.290637	0.564365	0.763947	0.890666	0.941425	0.973629	0.992613
G(215)			0	0	0	0	0.011364	0	0	0	0.003571	0.014583	0.003856	0.001982	0.016077	0.005482	0.001473	0.014848	0.170037	0.384855	0.54949	0.67226	0.794195	0.842827	0.924284
T(205)			0.026316	0.083333	0	0.006042	0.032197	0.01391	0.010465	0.015411	0.082143	0.104167	0.170951	0.296333	0.38085	0.414474	0.443026	0.470676	0.405243	0.340312	0.175465	0.048243	0.005277	0.004219	0.00554
G(204)			0.578947	0.083333	0.138577	0.193353	0.325758	0.414219	0.54186	0.39726	0.278571	0.195833	0.163239	0.295342	0.271526	0.365132	0.463654	0.409057	0.273408	0.070824	0.024595	0.01075	0.00686	0.003165	0.045245
S(235)			0	0	0	0	0.00947	0.063369	0.015116	0.010274	0.014286	0.002083	0.001285	0.021804	0.139693	0.256579	0.401277	0.360059	0.222472	0.06147	0.019796	0.007866	0.002111	0.001055	0
D(3)			0	0	0	0	0	0	0.003488	0.006849	0.007143	0	0.002571	0.025768	0.142551	0.263158	0.407171	0.364514	0.221723	0.061024	0.019796	0.00839	0.002639	0.00211	0.001847
R(385)			0	0	0	0	0	0	0	0.001712	0.003571	0	0	0	0.036442	0.002741	0	0.005197	0.017228	0.053898	0.087283	0.147614	0.055937	0.006329	0.000923
L(139)			0	0	0	0.003021	0.007576	0	0	0	0	0.004167	0.003856	0.001982	0.036799	0.004386	0.001473	0.002227	0.01573	0.032962	0.074685	0.146041	0.05277	0.005274	0.000923
T(362)			0.013158	0	0	0	0	0	0	0	0	0.002083	0.001285	0.006938	0.006431	0.056469	0.040766	0.057164	0.073408	0.105568	0.060888	0.035396	0.003166	0.00211	0.001847
P(13)			0.013158	0.083333	0.067416	0.006042	0.007576	0.007728	0.017442	0.068493	0.067857	0.16875	0.18509	0.084242	0.054305	0.053728	0.05501	0.04974	0.03221	0.016036	0.004499	0.003146	0.001583	0.001055	0.000923
S(202)			0.052632	0	0.172285	0.114804	0.079545	0.041731	0.019767	0.077055	0.15	0.025	0.061697	0.1556	0.057878	0.045504	0.03831	0.023756	0.010487	0.005345	0.0021	0.001049	0.000528	0	0
R(195)			0.013158	0	0	0	0.020833	0.035549	0.069767	0.107877	0.167857	0.3	0.362468	0.061447	0.008217	0.002193	0.001473	0.00297	0.002996	0.000445	0.0003	0	0.000528	0.001055	0.000923
M(234)			0.013158	0	0	0	0	0.001546	0.001163	0.001712	0.075	0.058333	0.03599	0.00892	0.118614	0.038377	0.005894	0.001485	0	0	0	0.000524	0.000528	0.00211	0
S(187)			0.171053	0	0	0.006042	0	0.058733	0.154651	0.085616	0.057143	0.00625	0	0.022795	0.034655	0.033991	0.012279	0.008909	0.002247	0	0	0.000262	0	0	0
Q(9)			0.013158	0	0	0	0	0.001546	0.002326	0	0	0.004167	0.002571	0.000991	0.005359	0.004386	0.002456	0.002227	0.000749	0.001336	0.007798	0.016518	0.026385	0.061181	0.199446
P(151)			0	0	0	0	0	0	0	0.001712	0	0	0.001285	0	0.000715	0.002741	0.001965	0.001485	0.002247	0.03029	0.04949	0.015469	0.046438	0.035865	0.004617
G(212)			0.026316	0	0	0.006042	0.030303	0.075734	0.043023	0.025685	0.025	0.039583	0.041131	0.022795	0.00393	0.011513	0.033399	0.026726	0.044944	0.001782	0.0006	0	0	0	0.000923
A(376)			0.013158	0.083333	0	0	0	0	0	0	0.017857	0.004167	0.015424	0.003964	0.100036	0.033991	0.004912	0	0	0	0	0.001311	0	0	0
S(413)			0	0	0	0	0	0	0	0	0	0	0	0.000991	0.001072	0.002741	0.013752	0.020045	0.058427	0.048107	0.029694	0.007341	0.001055	0	0
P(207)			0	0	0	0	0	0.004637	0.002326	0.058219	0.071429	0.16875	0.176093	0.051536	0.006074	0.001096	0.000491	0	0	0	0.0006	0.000787	0.001055	0	0.001847
A(220)			0.118421	0.166667	0.014981	0	0.001894	0	0.019767	0	0.014286	0.008333	0.020566	0.009911	0.036799	0.054825	0.01277	0.001485	0.001498	0.000891	0.0009	0.000262	0.001055	0	0
D(144)			0	0	0	0	0.003788	0.009274	0.011628	0.011986	0	0.002083	0.001285	0.015857	0.015363	0.006031	0.001473	0.008909	0.012734	0.016927	0.014097	0.003933	0.003694	0.005274	0.000923
Q(289)			0	0	0	0.003021	0.007576	0.001546	0.001163	0.001712	0	0	0.001285	0.002973	0.001429	0.000548	0.001473	0.005939	0.011985	0.031626	0.025195	0.008128	0.000528	0.00211	0.006464
G(238)			0	0	0	0	0	0	0.002326	0	0	0.00625	0.001285	0.004955	0.004287	0.000548	0.002456	0.001485	0.005243	0.02539	0.016797	0.009701	0.004749	0.014768	0.012927
E(378)			0	0	0	0	0.001894	0	0.002326	0	0	0	0.003856	0	0	0.000548	0.029961	0.050483	0.008989	0	0	0.000262	0	0.003165	0.003693
S(186)			0.013158	0	0.003745	0	0.003788	0.006182	0.011628	0.013699	0.017857	0.077083	0.084833	0.007929	0.003215	0.000548	0.000491	0.000742	0	0	0	0	0	0	0
S(194)			0.013158	0	0	0	0.003788	0.032457	0.012791	0.017123	0.017857	0.0375	0.015424	0.019822	0.007145	0.001645	0.001473	0.001485	0.002996	0	0.004499	0.001049	0	0.001055	0
P(199)			0	0.166667	0.007491	0.009063	0.00947	0.001546	0.005814	0.003425	0.003571	0.010417	0.029563	0.017839	0.011433	0.01864	0.000982	0.000742	0.000749	0.000891	0.0015	0.000262	0.000528	0.001055	0.000923
L(230)			0	0	0	0	0.001894	0	0.001163	0	0	0	0	0	0.000357	0	0.000982	0.003712	0.000749	0	0.011998	0.018091	0.003694	0.001055	0.001847
S(197)			0	0	0.007491	0	0.001894	0.010819	0	0.013699	0.007143	0.002083	0.001285	0.019822	0.018221	0.009868	0.004912	0.001485	0.000749	0.000445	0	0	0.000528	0	0
D(128)			0	0	0	0	0.001894	0.004637	0.010465	0.017123	0.021429	0.010417	0.003856	0.016848	0.020007	0.003289	0.001965	0.000742	0	0.000445	0.0006	0	0	0.001055	0
Q(70)			0	0	0	0	0	0.001546	0	0	0.003571	0	0	0.007929	0.008574	0.027412	0.010806	0.005939	0.001498	0	0	0	0.002639	0.001055	0
S(193)			0	0.083333	0	0	0.005682	0	0.002326	0.008562	0	0.004167	0.003856	0.005946	0.000715	0.002193	0.010806	0	0.014981	0.002227	0.002999	0.00236	0.007388	0.004219	0.00831
Q(384)			0	0.083333	0	0	0	0.010819	0.005814	0.003425	0.007143	0	0.026992	0.032706	0.007145	0.002193	0.000491	0	0	0.001782	0.0018	0.001049	0	0	0
D(402)			0.026316	0	0	0	0.003788	0.026275	0.006977	0.032534	0.010714	0.008333	0.014139	0.003964	0.000715	0.002193	0.000491	0	0.001498	0.001782	0	0.003933	0.004749	0.001055	0
A(381)			0	0	0	0	0	0.003091	0	0.001712	0	0	0	0	0.000715	0.005482	0	0	0	0	0.004799	0.012323	0.011609	0.00211	0
A(119)			0	0	0	0	0	0.001546	0	0.001712	0	0	0	0.000991	0.001786	0	0.001473	0.004454	0.002247	0	0.0006	0.000787	0.000528	0.016878	0.053555
Q(418)			0	0	0	0	0	0	0.001163	0	0	0	0	0.004955	0.006074	0.003289	0.003438	0.001485	0.000749	0.004009	0.008998	0.003671	0.001055	0	0.000923
A(35)			0	0.083333	0	0	0.001894	0.026275	0.006977	0.003425	0.003571	0.004167	0.007712	0.001982	0.008217	0.000548	0.002947	0.007424	0.002247	0.000891	0.0006	0.000787	0.000528	0.001055	0.001847
P(67)			0	0	0	0	0	0	0.002326	0.003425	0.014286	0	0	0.004955	0.005359	0.016447	0.000982	0.008166	0.000749	0.000891	0.0024	0.000524	0.000528	0	0.00277
D(348)			0	0	0.003745	0	0	0.001546	0.001163	0	0	0.004167	0	0.002973	0.001786	0.002193	0.002947	0.00297	0	0.000445	0.0009	0.006293	0.001583	0.015823	0.012004
A(208)			0	0	0	0	0	0.001546	0.006977	0.003425	0	0.002083	0.001285	0.002973	0.001072	0.014803	0.002456	0.000742	0.002247	0.000445	0.0015	0.001835	0.002111	0.003165	0.004617
P(365)			0	0.166667	0	0	0	0.001546	0.001163	0	0	0.002083	0.011568	0.002973	0.002858	0.001645	0.000491	0.002227	0.000749	0.000445	0.0003	0.003146	0.003166	0.006329	0.017544
G(236)			0.013158	0	0	0	0	0	0	0	0	0	0.001285	0	0.002144	0.009868	0.003438	0.009651	0.002996	0.002673	0.0012	0.000787	0.003166	0.004219	0.003693
S(33)			0	0	0	0	0	0	0	0	0.003571	0	0	0.000991	0.000715	0	0.002456	0.005197	0.005243	0.003118	0.005699	0.005506	0.000528	0.00211	0
P(279)			0	0	0	0	0	0	0.002326	0	0	0.00625	0.002571	0.000991	0.000715	0.023026	0.001473	0.004454	0.000749	0.000891	0.0006	0.001049	0	0.001055	0.000923
M(210)			0.013158	0	0	0.006042	0.003788	0.001546	0.001163	0.005137	0.003571	0.0125	0.010283	0.016848	0.003215	0.001096	0.000491	0	0	0.000445	0.0024	0.000524	0.000528	0	0.00554
S(2)			0	0	0	0	0	0	0	0.001712	0	0.008333	0.002571	0.010902	0.008217	0.007127	0.002947	0.005939	0.002996	0	0	0	0	0	0
N(11)			0	0	0	0	0	0	0.012791	0.008562	0.039286	0.014583	0.005141	0.006938	0.005002	0.003838	0.000491	0.000742	0	0	0	0.000262	0	0	0
S(206)			0	0	0	0	0.003788	0.010819	0.003488	0.011986	0.025	0.016667	0.011568	0.007929	0.002858	0.001096	0	0	0	0.001336	0	0.001049	0	0.001055	0
S(327)			0	0	0.007491	0	0	0.003091	0.004651	0.003425	0	0	0	0.000991	0.001786	0.000548	0.000491	0	0.000749	0	0.003299	0.004982	0.00686	0.006329	0
A(134)			0	0	0	0	0	0.001546	0	0	0	0	0	0.003964	0.001429	0	0	0	0.001498	0.004009	0.004499	0.005768	0.001583	0.001055	0.00554
A(211)			0.013158	0.083333	0	0.006042	0.003788	0	0.001163	0.005137	0	0.002083	0.006427	0.010902	0.002858	0.001096	0.000982	0	0.004494	0	0.0015	0.001573	0.001583	0.006329	0.000923
D(401)			0	0	0.003745	0	0.001894	0	0	0	0	0.00625	0.001285	0.000991	0.017506	0.002741	0	0	0	0	0	0.000787	0.000528	0	0
S(201)			0	0	0	0.003021	0.003788	0.021638	0.00814	0	0.003571	0.004167	0.001285	0	0.002858	0.006031	0.006876	0.001485	0	0	0	0	0	0	0.000923
A(152)			0	0	0	0	0	0	0	0	0	0	0.003856	0.001982	0.002144	0.000548	0.002947	0.000742	0.002247	0.006682	0.002699	0.00236	0.002639	0.001055	0.00277
T(379)			0	0	0	0	0.001894	0.003091	0	0.001712	0	0.010417	0	0.000991	0.001786	0	0.002947	0.002227	0	0	0.0015	0.004457	0.008443	0.001055	0
G(25)			0	0	0.003745	0	0	0.001546	0.001163	0	0	0	0	0	0.010004	0.003289	0.002456	0	0.006742	0.000445	0.0003	0.000524	0	0.001055	0.000923
V(270)			0	0	0	0	0.001894	0	0.001163	0.001712	0	0.002083	0.001285	0.002973	0.003215	0.006031	0.000982	0.001485	0.001498	0.000445	0.0021	0.001835	0.002639	0.00211	0.000923
R(209)			0	0	0	0.003021	0.015152	0.004637	0.009302	0.005137	0	0.004167	0	0.006938	0.004645	0.000548	0.000491	0	0.001498	0	0.0018	0	0	0.001055	0
P(383)			0	0	0.003745	0.003021	0.003788	0	0	0.008562	0.003571	0	0.001285	0.002973	0.002858	0.001096	0.004912	0.000742	0	0.000891	0.0012	0.001573	0.002111	0.003165	0.001847
A(359)			0	0	0.007491	0	0	0	0.001163	0.001712	0.003571	0.004167	0.011568	0	0.00393	0.001096	0.000491	0.000742	0.003745	0.000445	0.0012	0.001573	0.004222	0	0
T(366)			0	0	0	0.006042	0	0	0	0.001712	0	0	0	0.000991	0.001072	0.001096	0.00835	0.001485	0.011236	0.000445	0.0006	0.000524	0.001055	0.001055	0.001847
Q(389)			0	0	0	0	0	0	0.002326	0.001712	0	0	0.001285	0	0	0.016996	0.000491	0.00297	0	0.000891	0.0006	0.002098	0	0	0
G(18)			0	0	0	0	0	0.001546	0.002326	0	0	0.004167	0.007712	0.000991	0.001429	0.003289	0.002947	0	0.000749	0	0.003299	0.000524	0.003166	0.001055	0.00277
D(22)			0	0	0	0	0.00947	0	0.001163	0.008562	0	0.002083	0	0.006938	0.002144	0	0.007859	0.000742	0	0	0.0003	0	0.001055	0.003165	0.00277
K(387)			0	0	0	0	0	0	0	0	0	0	0.001285	0.001982	0.001786	0.000548	0.000491	0	0.002247	0.008463	0.004799	0.000524	0.000528	0	0
P(80)			0.013158	0	0	0	0	0	0	0	0	0	0	0	0.000357	0.004386	0.005894	0.002227	0.003745	0.003563	0.0015	0.001049	0.000528	0	0
K(373)			0	0	0	0	0	0.001546	0	0	0	0	0	0	0.001429	0	0.001473	0.000742	0.000749	0.004009	0.0018	0.000524	0.002111	0.00211	0.01385
Q(380)			0	0	0	0	0	0	0	0	0	0	0	0	0	0.006031	0.000982	0	0	0	0.0015	0.003671	0.007388	0.001055	0
T(24)			0	0	0	0	0	0.001546	0	0.001712	0	0	0.005141	0	0.001786	0.001096	0.003929	0.005939	0.003745	0.001336	0.0003	0.001311	0.001055	0	0
P(6)			0	0	0	0.003021	0.001894	0.003091	0.005814	0	0	0	0.003856	0.003964	0.001072	0.000548	0	0	0	0	0.0006	0.000262	0.005277	0.004219	0.004617
G(243)			0	0	0	0	0	0.001546	0	0.001712	0	0	0	0.005946	0.001786	0.002741	0.000982	0.00297	0.001498	0.001336	0.0012	0.000787	0.002111	0.001055	0.000923
H(300)			0	0	0	0	0	0.003091	0.001163	0.001712	0	0.002083	0.005141	0.001982	0.001429	0.002193	0.000491	0.00297	0	0.001336	0.0003	0.001049	0.001055	0.004219	0.001847
A(173)			0	0	0	0	0	0	0	0	0	0	0	0.000991	0.000357	0	0.000491	0	0.001498	0.000445	0.0012	0.006293	0.002111	0.001055	0
A(90)			0	0	0	0	0	0	0	0	0	0.002083	0	0.000991	0.000715	0.001096	0.003438	0.005197	0.006742	0.000891	0.0003	0.001573	0.000528	0	0
A(12)			0	0	0	0.003021	0	0	0.002326	0	0	0.004167	0	0	0.000715	0	0.001473	0.006682	0.002996	0	0.0006	0.001835	0.003166	0.001055	0
N(213)			0	0	0	0	0.001894	0.004637	0.001163	0.005137	0	0	0.003856	0.002973	0.001072	0.004386	0.003438	0	0.002996	0	0	0.000262	0.000528	0	0
I(292)			0	0	0	0	0.001894	0.007728	0.016279	0.018836	0.003571	0	0.002571	0.000991	0.000357	0	0.000491	0	0	0	0	0	0	0	0
G(34)			0	0	0	0	0	0.001546	0	0.003425	0.003571	0	0	0.002973	0.003573	0.001645	0	0.000742	0	0	0.0015	0.002884	0	0	0
P(364)			0	0	0	0	0	0	0.002326	0	0	0	0.002571	0.001982	0	0	0	0.001485	0	0.000445	0.003599	0.001835	0.001055	0.005274	0.001847
T(135)			0	0	0	0	0	0	0.002326	0	0	0	0	0.001982	0.000357	0.003838	0.001965	0	0	0.000445	0.0021	0.002884	0.000528	0	0.000923
A(156)			0	0	0.003745	0	0	0	0.001163	0	0	0	0	0	0.000357	0.000548	0.002947	0.000742	0.000749	0.000891	0.002699	0.001573	0.000528	0.001055	0.003693
Q(28)			0	0	0	0.015106	0	0	0	0	0	0.004167	0.002571	0.001982	0.002858	0.002193	0.001965	0	0.004494	0	0	0.000262	0	0	0
K(256)			0	0	0	0	0	0	0	0	0	0	0	0	0.000357	0.000548	0.001965	0.000742	0.000749	0.001336	0	0.001049	0.008443	0.003165	0
A(182)			0	0	0	0	0	0.001546	0	0.001712	0.003571	0.002083	0	0	0.002501	0	0.001473	0	0.000749	0.001336	0.0015	0.001311	0.001583	0.00211	0.000923
A(251)			0.013158	0	0	0	0.005682	0.003091	0.001163	0	0	0	0	0.001982	0.000715	0.000548	0.000982	0	0.000749	0.000445	0.0012	0.001311	0.001583	0.004219	0.000923
A(217)			0.013158	0	0	0	0	0	0	0	0	0.004167	0.011568	0	0.001429	0.004386	0.000491	0	0	0	0.0003	0.000787	0	0.00211	0.001847
A(125)			0	0	0	0	0	0	0	0	0.003571	0	0	0	0.000357	0.010417	0.00442	0	0	0	0.0003	0.000262	0.000528	0	0
S(232)			0	0	0	0	0.003788	0	0.001163	0	0.007143	0	0.003856	0.002973	0.002858	0	0	0	0.000749	0.000891	0	0.000524	0	0.009494	0
D(103)			0	0	0.026217	0.003021	0.005682	0.003091	0.003488	0	0	0	0	0.001982	0.000357	0.000548	0	0	0	0	0.0009	0.001573	0.000528	0.001055	0.000923
L(219)			0	0	0	0	0	0	0	0	0	0	0.007712	0	0.000357	0.010965	0.000491	0	0	0	0.0003	0.000262	0	0	0
R(14)			0	0	0	0	0.003788	0	0.001163	0.003425	0.017857	0	0	0.001982	0	0.002193	0	0.002227	0	0.000891	0.0006	0.001049	0	0.001055	0
W(330)			0	0	0	0	0	0	0	0	0	0	0	0	0.000715	0	0	0	0	0	0.0021	0.001311	0.003166	0.005274	0
Q(7)			0	0	0	0	0	0	0	0	0	0	0	0.000991	0.001072	0.001096	0.001473	0	0.000749	0.000445	0.0015	0.002098	0.000528	0	0
M(322)			0	0	0	0	0	0	0	0	0	0	0.014139	0.001982	0.001072	0.001096	0.000491	0	0	0	0	0.000262	0.001055	0.00211	0
P(326)			0	0	0	0	0	0	0.001163	0	0	0.002083	0	0.001982	0.001072	0.000548	0.000491	0	0	0.000445	0.0009	0.000524	0.001055	0.006329	0.000923
A(218)			0	0	0	0	0	0	0	0	0	0	0	0	0.002858	0	0.002947	0.001485	0.001498	0.000445	0.0003	0	0.000528	0.001055	0

## Sheet: Asia
	2019-11-30	2019-12-31	2020-01-31	2020-02-29	2020-03-31	2020-04-30	2020-05-31	2020-06-30	2020-07-31	2020-08-31	2020-09-30	2020-10-31	2020-11-30	2020-12-31	2021-01-31	2021-02-28	2021-03-31	2021-04-30	2021-05-31	2021-06-30	2021-07-31	2021-08-31	2021-09-30	2021-10-31	2021-11-30
R(203)			0.324147	0.015437	0.249899	0.664211	0.46867	0.528599	0.82064	0.877099	0.779452	0.750771	0.790354	0.746043	0.813855	0.722437	0.755426	0.927666	0.934061	0.920919	0.960284	0.955225	0.997696	0.995715	0.996739
D(377)			0.002625	0	0.002434	0.005934	0.002565	0.003839	0.003721	0.00229	0.011201	0.009256	0.011722	0.013224	0.112586	0.053613	0.140934	0.261631	0.297733	0.484301	0.718196	0.873238	0.987692	0.987083	0.960904
D(63)			0	0	0.000406	0	0.000366	0.001919	0.00124	0.000573	0.001931	0.002743	0.00538	0.001354	0.096457	0.011681	0.046212	0.197843	0.280729	0.470491	0.66108	0.859158	0.988897	0.990737	0.99292
G(215)			0	0	0	0.000409	0.000733	0.000768	0.002729	0.000382	0.002317	0.000686	0.002114	0.001978	0.073876	0.010252	0.025405	0.061376	0.125783	0.304252	0.541636	0.751085	0.914214	0.868998	0.918665
G(204)			0.324147	0.015437	0.246653	0.664211	0.467571	0.525912	0.817663	0.875954	0.771727	0.745286	0.785934	0.74292	0.709149	0.673697	0.614772	0.664036	0.635767	0.431146	0.241014	0.045578	0.008196	0.005545	0.002665
D(3)			0.036745	0	0.000811	0.001432	0.000366	0.000384	0.000496	0.000573	0.003476	0.006514	0.005188	0.033528	0.171761	0.301261	0.36902	0.536047	0.586338	0.416945	0.229696	0.03707	0.008301	0.004978	0.00171
S(235)			0.03937	0	0.000406	0.001432	0	0.000768	0	0	0.004249	0.003085	0.00269	0.033007	0.169276	0.291765	0.347429	0.529361	0.584822	0.415946	0.229856	0.036911	0.007725	0.004474	0.000437
M(234)			0.051181	0.001715	0.001623	0.02701	0.019421	0.019194	0.088812	0.206298	0.188104	0.255742	0.490776	0.433049	0.338075	0.167563	0.068981	0.013716	0.002274	0.001086	0.000937	0.000452	0.000419	0.00063	0.000994
T(205)			0.005249	0.005146	0.004868	0.013096	0.078783	0.076008	0.025552	0.021183	0.025492	0.022969	0.015757	0.029883	0.049498	0.078992	0.131513	0.05693	0.04854	0.055891	0.017834	0.002184	0.001466	0.00252	0.001074
P(151)			0.073491	0	0	0.000205	0.00513	0.127831	0.535351	0.537595	0.320973	0.200206	0.137586	0.086839	0.050661	0.019328	0.003085	0.002481	0.004416	0.002562	0.001601	0.001581	0.001388	0.00189	0.00179
S(194)			0.070866	0.020583	0.008114	0.013914	0.061561	0.168522	0.079385	0.063359	0.119351	0.13507	0.138739	0.168992	0.103966	0.106471	0.038977	0.005652	0.002966	0.002128	0.000983	0.002409	0.00309	0.000882	0.000915
Q(418)			0	0.008576	0	0	0.000366	0.000768	0.000248	0	0.000772	0	0.000769	0.004061	0.026441	0.052185	0.14071	0.111965	0.043367	0.006297	0.000777	0.000803	0.001021	0.001449	0.004176
S(187)			0	0.008576	0.000811	0	0	0	0	0.000382	0	0.001028	0.000576	0.002499	0.024061	0.044706	0.132522	0.110345	0.040961	0.004907	0.00032	0.000134	0.000105	0	0
R(385)			0	0	0.000406	0	0	0	0.000248	0.000382	0	0	0.001729	0.001041	0.00624	0.001429	0.007459	0.049142	0.041917	0.040301	0.02762	0.006977	0.016524	0.040076	0.023744
A(90)			0.015748	0	0	0.002046	0.001832	0.001152	0.001737	0.001145	0.007725	0.037367	0.145273	0.125156	0.078689	0.03563	0.011553	0.001964	0.001779	0.002215	0.002629	0.00092	0.003064	0.006931	0.007477
L(139)			0	0	0	0.000818	0.001832	0.001536	0.000248	0	0.003476	0.002057	0.000576	0.001978	0.001428	0.001681	0.000841	0.002481	0.00636	0.015981	0.01461	0.00389	0.014586	0.037807	0.024341
Q(9)			0.001312	0	0.000406	0.000614	0.004397	0.000384	0.001737	0.004198	0.00618	0.001714	0.000961	0.003124	0.001745	0.003613	0.00286	0.003825	0.005207	0.003127	0.002584	0.003372	0.01215	0.025898	0.042278
P(13)			0.018373	0.001715	0.097769	0.135052	0.13668	0.066795	0.03101	0.010305	0.027037	0.007885	0.003267	0.003957	0.005182	0.011345	0.00802	0.002516	0.002373	0.00317	0.001601	0.001113	0.002331	0.003907	0.008312
T(362)			0	0	0	0.000614	0.000366	0.000768	0.000744	0.004389	0.003862	0.0024	0.001153	0.002395	0.00312	0.005294	0.011777	0.015473	0.013742	0.013984	0.006196	0.002719	0.00453	0.004537	0.00342
S(2)			0	0	0	0	0.000366	0.003071	0.012156	0.019656	0.023175	0.031539	0.026326	0.037276	0.033686	0.036891	0.015927	0.001206	0.00033	0.000869	4.6e-05	0.000485	5.2e-05	0.000252	0.000477
S(327)			0	0	0.001623	0.000205	0.000733	0.000768	0.000744	0.001336	0.002317	0.000343	0.000769	0.001354	0.001269	0.000672	0.000673	0.002033	0.002307	0.004343	0.002012	0.002451	0.007437	0.007687	0.02271
T(391)			0.002625	0.001715	0.000406	0	0	0.000384	0.000248	0.001145	0.000386	0.0024	0.007686	0.008642	0.002538	0.000924	0.000336	0.00062	0.001516	0.008989	0.010426	0.001949	0.001519	0.000315	0.000915
D(144)			0.003937	0	0.000406	0.000614	0.002199	0.000768	0.001985	0.001145	0.001931	0.004114	0.003459	0.010829	0.007668	0.004286	0.002075	0.002309	0.001516	0.000825	0.000617	0.000569	0.00144	0.004348	0.014477
R(209)			0.001312	0	0	0.000614	0.002199	0.007678	0.00645	0.00458	0.011201	0.008913	0.001537	0.006456	0.005235	0.004202	0.00387	0.00062	0.000758	0.000304	0.00128	0.003238	0.002488	0.001449	0.001273
P(142)			0	0	0	0.000409	0	0	0	0.000382	0	0.000343	0.000192	0.000625	0.001111	0.001092	0.002243	0.007134	0.005932	0.005819	0.005236	0.00097	0.000498	0.000315	0.000955
Q(229)			0	0	0	0.000205	0.000366	0.002303	0.000248	0.000382	0.001545	0.001028	0	0.001249	0.001111	0.000672	0.000336	0.000517	0.001087	0.001433	0.003933	0.003505	0.003326	0.002773	0.002108
A(152)			0	0	0	0	0.000366	0.001536	0.000496	0.000382	0.000386	0.000343	0.000192	0.001249	0.001639	0.001765	0.001963	0.001378	0.001812	0.005472	0.004664	0.000862	0.002278	0.004852	0.005687
P(383)			0.002625	0.001715	0.002434	0.001023	0.000366	0.001152	0.001985	0.001336	0.001545	0.009256	0.002882	0.003332	0.004971	0.004286	0.006562	0.003894	0.002603	0.003952	0.001646	0.000502	0.001885	0.001449	0.002148
A(211)			0.001312	0.008576	0.001217	0.000614	0.002199	0.001536	0.003721	0.00458	0.005794	0.002743	0.004804	0.011662	0.00587	0.006807	0.003758	0.001068	0.002043	0.002823	0.001486	0.000745	0.001178	0.00063	0.000477
S(250)			0.002625	0	0	0.000205	0	0	0	0	0.00309	0.002057	0.01249	0.014161	0.01909	0.010672	0.005047	0.000138	6.6e-05	0.000217	0	5.9e-05	0.000157	0.000315	0.000398
T(135)			0	0	0.000406	0.000205	0.000733	0.000768	0.001737	0.000191	0.001545	0.001028	0.001153	0.002291	0.002485	0.002101	0.002019	0.001689	0.001285	0.004169	0.001623	0.001205	0.001676	0.002331	0.004057
S(193)			0.001312	0	0.000406	0.001432	0.001832	0.00691	0.003721	0.003244	0.008884	0.003771	0.005188	0.004581	0.003702	0.002353	0.001234	0.000793	0.000989	0.000999	0.000663	0.001171	0.001021	0.002899	0.003659
T(379)			0.001312	0	0	0	0.001832	0.000768	0.000248	0.001527	0.006566	0.004457	0.002114	0.004269	0.004019	0.001765	0.002468	0.003412	0.001747	0.001607	0.001052	0.000502	0.001257	0.001512	0.002187
P(67)			0	0	0.000406	0	0	0.000384	0.001488	0.00458	0.004635	0.003428	0.00538	0.005206	0.005341	0.00479	0.005103	0.002654	0.00056	0.000869	0.000252	0.000711	0.000655	0.000441	0.001193
G(34)			0.002625	0	0	0.000409	0	0.000768	0.000248	0.000763	0.00618	0.001028	0.001537	0.003436	0.001322	0.001092	0.000673	0.000551	0.001252	0.000738	0.000457	0.000711	0.00055	0.003655	0.010937
A(119)			0	0	0.002434	0.000205	0.000366	0.000384	0.000744	0.001145	0.002317	0.003771	0.006533	0.004477	0.005923	0.006303	0.006057	0.000517	0.000659	0.001737	0.00048	0.000209	0.000759	0.001449	0.002824
S(202)			0.011811	0.015437	0.047465	0.005116	0.015757	0.011516	0.000744	0.000191	0.002704	0.000686	0.002498	0.008746	0.00238	0.003613	0.001626	0.000655	0.000725	0.000434	0.000252	0.000234	0.000393	0.001953	0.00167
P(199)			0.001312	0.001715	0.005274	0	0.004397	0.001152	0.002233	0.00458	0.005407	0.001714	0.00538	0.006664	0.006452	0.00437	0.001402	0.000862	0.000758	0.000738	0.000412	0.000636	0.000969	0.001197	0.000835
G(18)			0	0	0.000406	0	0.005497	0.000384	0.000248	0.000954	0.001545	0.003085	0.001153	0.001249	0.001111	0.00437	0.007179	0.002826	0.00056	0.000478	0.000777	0.000569	0.001571	0.001386	0.002148
A(208)			0	0	0.002028	0.000818	0.000366	0	0	0.000191	0	0.000686	0.002114	0.000208	0.000952	0.00042	0.000785	0.000586	0.000824	0.001737	0.001029	0.001498	0.001781	0.002457	0.004614
D(401)			0.001312	0	0.000406	0.000614	0.009161	0.011132	0.003721	0.005344	0.004249	0.002057	0.000961	0.005519	0.004442	0.006639	0.002243	0.000827	0.002373	0.000695	0.000137	0.000393	0.000419	0.000378	0.000199
A(134)			0	0	0	0.000205	0	0.000768	0	0	0	0	0.000384	0	0.000317	0.00042	0.000168	0.000172	0.000758	0.000347	0.001097	0.002895	0.0022	0.001071	0.000636
A(220)			0	0	0	0	0	0.000384	0.000248	0.000382	0.000772	0.011999	0.005188	0.007497	0.005976	0.00563	0.001178	0.000207	0.001384	0.002171	0.001509	6.7e-05	0	0.000378	0.000795
T(366)			0	0	0	0.003069	0.008062	0.009981	0.003225	0.003817	0.004635	0.005142	0.001922	0.001978	0.000952	0.00084	0.000953	0.001964	0.000923	0.000999	0.000572	0.000544	0.001362	0.002331	0.002148
P(365)			0	0	0	0.000205	0	0.001152	0.000496	0.000573	0.001545	0.001371	0.001153	0.002395	0.003437	0.002269	0.001346	0.00093	0.000758	0.000869	0.000937	0.000569	0.00343	0.001008	0.001472
D(402)			0	0	0	0.000409	0.000366	0.001152	0.000496	0.000573	0.001931	0.005828	0.003459	0.007913	0.003966	0.001765	0.00129	0.002068	0.000857	0.000869	0.001601	0.000276	0.00034	0.000504	0.001909
H(300)			0	0	0	0.000409	0.001099	0.000384	0.000496	0.000763	0.000772	0.000686	0.000769	0.000625	0.000846	0.001176	0.000841	0.00093	0.001747	0.00139	0.001052	0.000561	0.001205	0.002079	0.00525
S(183)			0.002625	0	0.000406	0	0	0.002303	0.000992	0.000954	0.001159	0.000343	0.002114	0.000312	0.000159	0.000252	5.6e-05	6.9e-05	6.6e-05	0.004516	0.001189	0.000343	0.004844	0.002268	0.001392
G(238)			0	0	0.000406	0.000409	0.000366	0.001536	0.000744	0.001145	0.001159	0.001371	0.001729	0.001458	0.001375	0.001345	0.001178	0.000414	0.001252	0.001173	0.001097	0.000577	0.002252	0.00189	0.003102
P(80)			0	0	0	0.000205	0	0.000384	0	0.000191	0.002704	0.000343	0.000576	0.001041	0.001481	0.001849	0.004318	0.002274	0.000791	0.003257	0.00144	0.000577	0.00034	0.00063	0.001034
R(195)			0.001312	0	0.006897	0.000205	0.003298	0.001919	0.000992	0.001908	0.001159	0.002057	0.00269	0.001666	0.002168	0.004034	0.003365	0.001723	0.000956	0.000738	0.000206	0.000569	0.000602	0.000756	0.002028
A(217)			0	0	0	0.000205	0	0.000768	0.000496	0.000191	0.000772	0.003085	0.000192	0.000625	0.00074	0.004538	0.006562	0.00093	0.000824	0.001433	0.000572	0.000494	0.001807	0.000693	0.001312
M(210)			0.001312	0.008576	0	0.000614	0	0.000768	0.002233	0.000954	0.007725	0.001371	0.002498	0.005935	0.00275	0.003109	0.002019	0.000724	0.000494	0.000651	0.000617	0.000477	0.000733	0.001386	0.002307
A(182)			0	0	0.000406	0.000205	0.000733	0	0	0.001145	0.001545	0.001714	0.004228	0.003124	0.001798	0.001513	0.000617	0.00062	0.001186	0.000695	0.001143	0.000661	0.001597	0.001449	0.002625
Q(389)			0	0	0.000406	0.000818	0.001099	0.000384	0.000496	0.000763	0.000386	0.000686	0.000961	0.006039	0.001798	0.001176	0.000336	0.001413	0.001615	0.00139	0.001486	0.000736	0.000733	0.00063	0.001312
P(168)			0	0	0.001217	0	0.001099	0.000768	0.000248	0.000191	0.000772	0.000343	0.000961	0.000521	0.003173	0.001176	0.000449	0.00062	0.000593	0.000521	0.000594	0.00082	0.002592	0.003151	0.002068
V(270)			0	0	0	0.000409	0.000366	0.000384	0.000248	0	0.000772	0.000686	0.001345	0.001041	0.001005	0.001176	0.000841	0.002447	0.002373	0.001824	0.000709	0.000519	0.000838	0.002079	0.00171
G(120)			0	0	0	0.000205	0.000366	0	0	0	0	0.000343	0	0.008226	0.007985	0.003613	0.000336	0.000172	0.000198	0.001954	0.000777	7.5e-05	0.000367	0.001323	0.001472
P(279)			0.002625	0	0	0.000205	0.000366	0.000384	0	0.000191	0.000772	0.0024	0.003843	0.004894	0.004231	0.002773	0.000561	0.000689	0.00056	0.000825	0.001052	0.000226	0.000707	0.002268	0.001631
G(30)			0	0	0	0.000205	0	0	0.000248	0.000191	0	0	0.001537	0.000521	0.001534	8.4e-05	0.000561	0.000827	0.00201	0.000825	0.000617	0.00097	0.001676	0.001701	0.001392
L(161)			0	0	0	0	0	0.000768	0	0.000191	0.000386	0	0	0.000104	0.000212	0.000336	0.000224	0.000103	0.000824	0.000955	0.0008	0.000636	0.00165	0.002647	0.005409
A(12)			0	0	0	0	0	0.002687	0.00124	0.000382	0.001545	0.000686	0.003843	0.002187	0.002644	0.003613	0.002972	0.000793	0.000626	0.000825	0.000457	0.000234	0.000786	0.001512	0.00179
L(230)			0	0	0	0	0.000366	0	0.000248	0	0	0	0	0.000312	0.000423	0.000168	0.000393	0.000482	0.00033	0.001042	0.001029	0.000954	0.0022	0.003277	0.001989
A(398)			0.001312	0	0	0	0	0.000768	0.001488	0.001336	0.001931	0.002057	0.002306	0.001666	0.002274	0.001681	0.000897	0.000586	0.00056	0.000738	0.000686	0.000435	0.000995	0.001575	0.003301
T(334)			0	0	0	0.001023	0.000366	0.005374	0.001985	0.000191	0.000386	0.000686	0.001153	0.001041	0.00201	0.003613	0.004991	0.00131	0.000362	0.000217	0.000572	0.000468	0.000733	0.000378	0.000915
P(326)			0	0	0.000406	0	0	0	0	0.000382	0	0	0.000769	0.001874	0.001851	0.002017	0.001682	0.001068	0.001252	0.001173	0.000755	0.00036	0.000838	0.000882	0.003102
K(373)			0	0	0.000811	0.000614	0.003664	0.002303	0.000744	0.000954	0	0.002057	0	0.000312	0.001111	0.000672	0.00028	0.000655	0.000659	0.000912	0.000846	0.000552	0.001414	0.002205	0.003381
S(232)			0	0	0	0.000205	0	0	0	0.000382	0	0	0	0.000416	0.000212	0	0.000617	0.000517	9.9e-05	0.000174	0.000206	0.00092	0.002095	0.002268	0.005131
A(156)			0	0	0	0.000205	0.000366	0.001152	0.000248	0.000191	0	0	0.000384	0.000312	0.00037	0.000252	0.00028	0.000999	0.001812	0.001303	0.000594	0.000544	0.001021	0.00252	0.003023
G(236)			0	0	0.000406	0.000205	0	0.001152	0	0	0	0.000686	0.000192	0	0.000635	0.000672	0.001907	0.005445	0.000791	0.001824	0.000412	0.000184	0.000367	0.000567	0.000875
G(212)			0	0	0.000406	0.000409	0.000733	0.000384	0.000248	0.001718	0.001931	0.001371	0.000769	0.001041	0.000687	0.001765	0.000897	0.001964	0.002406	0.001303	0.000434	0.000385	0.000759	0.000756	0.000517
A(251)			0	0	0	0.000205	0.000733	0.000384	0.000248	0.000191	0.001159	0.000686	0.001345	0.000416	0.000899	0.000504	0	0.000345	0.00033	0.000782	0.001029	0.000845	0.001388	0.00334	0.001312
S(413)			0.001312	0	0	0.000205	0.001099	0	0	0.000382	0.001545	0.001371	0.000384	0.001249	0.000582	0.001261	0.001346	0.001275	0.000494	0.000695	0.000229	0.000284	0.000995	0.002457	0.003659
Q(7)			0	0	0	0	0.002931	0.001152	0.000744	0.000382	0.001931	0.002057	0.001153	0.007601	0.001798	0.001092	0.002916	0.00131	0.001022	0.000651	0.000137	0.000268	0.000393	6.3e-05	0.000278
A(35)			0.001312	0	0	0.000205	0.000733	0.000768	0.000496	0.000191	0.000386	0.000343	0.000192	0.001041	0.000846	0.003445	0.001402	0.001447	0.001812	0.000738	0.000366	0.000167	0.000838	0.001071	0.00175
T(265)			0	0	0.000406	0	0	0.001536	0	0.000191	0	0	0	0	0.000264	0	0.000336	0.000448	0.001219	0.006384	0.001623	8.4e-05	0.000288	0.000441	0.000835
R(40)			0	0	0	0.001432	0.001466	0.001152	0.000496	0.001718	0.022016	0.02914	0.001729	0.001041	0.000529	0.000168	0.00028	0.000172	0.000428	0.000478	0.000297	0.000134	0.000419	0.001134	0.001273
S(33)			0	0	0	0.000614	0.000366	0.003071	0	0.000191	0	0.001028	0.000384	0.000312	0.000952	0.001513	0.000729	0.000379	0.000989	0.001216	0.000777	0.000552	0.000969	0.000882	0.001352
A(55)			0	0	0	0	0.000366	0.000384	0	0	0	0.000343	0	0.000625	0.000317	0.001597	0.000561	0.00224	0.00379	0.000478	0.000343	0.000234	0.000393	0.000756	0.000676
D(348)			0.001312	0	0	0.000205	0.001099	0.001152	0.000248	0.000382	0.000386	0	0.000961	0.000937	0.001058	0.000588	0.001178	0.000655	0.000461	0.000434	0.000503	0.000176	0.000367	0.003088	0.003659
R(14)			0	0	0	0	0	0	0	0.000191	0	0.001371	0.000384	0	0.001163	0.000504	0.000505	0.001068	0.001318	0.000869	0.000572	0.000627	0.000838	0.00126	0.001034
P(6)			0	0	0.000811	0	0.002565	0	0.000248	0.000191	0.002704	0.000686	0.001729	0.000937	0.001692	0.001008	0.00028	0.000241	0.000428	0.000478	0.000617	0.000435	0.000969	0.001008	0.002227
R(41)			0	0	0	0	0	0.000768	0	0.000191	0.000386	0	0.000384	0.000104	0.000476	0.001345	0.005103	0.000689	0.000264	0.000651	0.000732	0.000268	0.000759	0.001764	0.000597
Q(289)			0	0	0.000811	0.000409	0.000733	0.000384	0.000248	0.000573	0.001545	0.000343	0.000384	0.001354	0.00037	0.001008	0.001122	0.000758	0.00033	0.001129	0.001303	0.000243	0.0011	0.000693	0.000915
K(374)			0	0	0	0.000409	0	0.001152	0.000248	0.000191	0.000386	0.000343	0.000192	0.000729	0.000264	0.000252	0.000168	0.000414	0.000362	0.000347	0.000206	0.000669	0.003011	0.000504	0.000477
A(252)			0	0	0	0	0	0.000384	0.000496	0.000573	0	0	0	0.000625	0.000846	0.000336	0.001514	0.00131	0.000725	0.001303	0.000869	0.000268	0.000759	0.000819	0.000875
A(267)			0	0	0	0	0	0	0	0	0.000386	0.000343	0	0.000104	0.000423	0.001849	0.000505	0.000276	0.000264	0.000869	0.001578	0.000192	0.000681	0.001764	0.002108
D(399)			0	0	0	0.000614	0.000366	0.000384	0.000496	0	0.005021	0.002057	0.000192	0.000625	0.001005	0.000756	0.00129	0.000896	0.000692	0.000434	0.000252	0.000268	0.00034	0.002773	0.000994
T(24)			0	0	0	0.000205	0	0.000384	0.000496	0	0.000772	0.000343	0.000384	0.002499	0.001005	0.000756	0.000449	0.000827	0.001252	0.000869	0.000457	0.000376	0.00055	0.000819	0.000517
N(8)			0	0	0	0	0	0	0	0	0	0	0.000192	0.005206	0.002856	0.001933	0.000673	0.000414	0.000231	0.001259	0.000686	0.000159	0.000262	0.000189	0.000358
T(16)			0	0	0.000811	0.000205	0.001466	0.001536	0.00124	0.000954	0.001159	0.007885	0.000192	0.006352	0.002538	0.001429	0.001178	0.000103	0.000231	0.000391	0.00016	0.0001	0.000236	0.000504	0.000318
D(128)			0.001312	0	0.000406	0.000205	0.001832	0.002303	0.001488	0.001145	0.007725	0.0024	0.002306	0.001978	0.002274	0.004706	0.001178	0.000414	0.000198	0.000347	0.000366	1.7e-05	2.6e-05	0.000252	0.000159
A(414)			0	0	0	0.002046	0	0	0	0.000573	0	0.001028	0.001153	0.001562	0.001745	0.001933	0.000505	0.000276	0.000362	0.000521	0.000434	0.000226	0.000759	0.00063	0.001511
D(22)			0	0	0.000406	0	0.000366	0.000768	0.001985	0.000382	0.000386	0.000343	0.000192	0.001249	0.001586	0.002185	0.000393	0.001275	0.000791	0.000738	0.000389	0.00031	0.000183	0.000315	0.000477
G(243)			0	0	0	0.000409	0	0.000768	0.000496	0.000382	0	0.000343	0.000384	0.000833	0.000582	0.000924	0.000449	0.00031	0.000527	0.000955	0.000594	0.000385	0.000969	0.000945	0.000835
A(359)			0	0	0.000811	0.000205	0.000366	0.000768	0.000248	0.000763	0.000386	0.001371	0.000576	0.000833	0.000899	0.000924	0.001178	0.000827	0.000758	0.000782	0.000274	9.2e-05	0.000576	0.000441	0.00179
S(412)			0	0	0	0	0	0	0	0	0	0.000686	0	0.000104	0.000264	0.000168	0.000505	0	0.00033	0.000869	0.000617	0.000586	0.000628	0.00252	0.001074
A(381)			0.001312	0	0.000406	0	0	0.000768	0	0	0	0.000343	0.000961	0.000521	0.000264	0.000336	0.000449	0.000655	0.002933	0.002041	0.000366	0.000117	0.000157	0.000504	0.000159
G(147)			0	0	0	0	0.000366	0.000768	0	0	0	0	0	0.000312	5.3e-05	0	0.000168	0.000103	0	0	0.000434	0.001347	0.000917	0.000126	0.000119
P(46)			0	0	0	0.000409	0	0	0	0	0	0	0.000192	0	0.000423	0.000336	0.000505	0.00031	0.000362	0.000391	0.000457	0.000218	0.000733	0.001386	0.003261

## Sheet: Europe
	2019-11-30	2019-12-31	2020-01-31	2020-02-29	2020-03-31	2020-04-30	2020-05-31	2020-06-30	2020-07-31	2020-08-31	2020-09-30	2020-10-31	2020-11-30	2020-12-31	2021-01-31	2021-02-28	2021-03-31	2021-04-30	2021-05-31	2021-06-30	2021-07-31	2021-08-31	2021-09-30	2021-10-31	2021-11-30
R(203)			0.383243	0.186567	0.250574	0.413015	0.536917	0.673122	0.741485	0.482812	0.364884	0.22874	0.212215	0.339723	0.660199	0.736211	0.901993	0.958557	0.979236	0.986607	0.989474	0.99916	0.99965	0.999288	0.999332
D(377)			0.006216	0	0.003048	0.003358	0.001347	0.000745	0.010053	0.078217	0.024015	0.012124	0.011561	0.013912	0.161451	0.008143	0.004454	0.015826	0.172945	0.709014	0.948089	0.995497	0.998708	0.999004	0.99904
D(63)			0.00027	0	0.000226	0.00051	0.001078	0.000106	0.00041	0.000809	0.000396	0.000386	0.000704	0.000509	0.152572	0.001623	0.00119	0.011862	0.171644	0.703493	0.930233	0.977789	0.990479	0.989168	0.991375
G(215)			0.000541	0	7.5e-05	0.000553	0.001617	0.002235	0.006155	0.002346	0.001012	0.0007	0.001839	0.000794	0.146184	0.001651	0.001076	0.005556	0.136273	0.618026	0.845981	0.922147	0.954001	0.968006	0.980295
G(204)			0.382162	0.186567	0.248353	0.41174	0.53557	0.672803	0.733484	0.47812	0.361541	0.228257	0.211178	0.338929	0.507115	0.734762	0.899755	0.945132	0.808002	0.277746	0.041311	0.003785	0.000885	0.000992	0.001049
D(3)			0.161081	0.001866	0.000452	0.000723	0.000808	0.000106	0.000205	0.000971	0.00044	0.003116	0.044172	0.254841	0.469073	0.691616	0.878289	0.925504	0.785792	0.26338	0.036279	0.003243	0.000655	0.000546	0.000355
S(235)			0.16027	0.001866	0.000339	0.000128	0.000674	0	0	0.000404	0.000484	0.00227	0.042686	0.253838	0.468333	0.69055	0.877877	0.925284	0.786077	0.264305	0.036405	0.002868	0.000365	0.000334	0.000151
Q(9)			0.001892	0	0.000263	0.000808	0.001482	0.000745	0.000616	0.000971	0.001627	0.003888	0.003013	0.002171	0.009822	0.001623	0.00114	0.000865	0.000815	0.004979	0.107336	0.133982	0.120636	0.128973	0.148196
A(220)			0.335135	0.005597	0.000339	0.000893	0.000404	0.009577	0.037546	0.169619	0.352393	0.515373	0.520267	0.416294	0.192833	0.125162	0.034439	0.009243	0.003164	0.001203	0.00082	0.000181	0.000264	0.000464	0.000295
S(327)			0.001081	0	0.000565	0.000765	0.000943	0.001277	0.000821	0.000243	0.000528	0.001039	0.001272	0.001408	0.006318	0.001435	0.001946	0.001806	0.003524	0.025193	0.040875	0.038199	0.030991	0.027048	0.020587
M(234)			0.063514	0.001866	0.001317	0.00068	0.000539	0.002235	0.007591	0.087034	0.106571	0.104842	0.109844	0.093313	0.06277	0.052787	0.016677	0.005781	0.002015	0.000674	0.002263	0.000455	0.000505	0.00119	0.000979
A(376)			0.060811	0.001866	0.000113	4.3e-05	0.000404	0.000851	0.004719	0.085982	0.092936	0.096993	0.099084	0.080389	0.052373	0.036348	0.008698	0.001615	0.000309	0.000313	0.002041	0.00017	0.000279	0.000651	0.000667
P(365)			0.02	0	0.000263	0.00034	0.000674	0.000532	0.00595	0.018361	0.039233	0.030141	0.038773	0.067346	0.032672	0.017275	0.005493	0.003133	0.002254	0.002218	0.003022	0.002305	0.002907	0.004101	0.00462
T(205)			0.003514	0	0.00222	0.00357	0.004446	0.00266	0.01149	0.005986	0.01535	0.006811	0.005458	0.005586	0.009632	0.020974	0.027133	0.023401	0.014569	0.010715	0.006484	0.000906	0.000584	0.001301	0.001804
P(199)			0.025946	0.005597	0.001355	0.002125	0.001213	0.00117	0.027493	0.033811	0.027665	0.032605	0.04294	0.047727	0.028625	0.025021	0.005896	0.001298	0.001029	0.000751	0.000667	0.001243	0.000878	0.000823	0.001234
S(194)			0.025676	0.001866	0.010575	0.024398	0.031663	0.035646	0.051703	0.084931	0.069845	0.058423	0.058668	0.02742	0.013983	0.010839	0.003909	0.00131	0.000594	0.000369	0.000371	0.000375	0.000862	0.001226	0.00111
V(270)			0	0	0.000188	8.5e-05	0.000404	0.000638	0.00041	0.000404	0.000308	0.000797	0.001017	0.000928	0.001404	0.001198	0.000925	0.001887	0.001838	0.001078	0.000881	0.002837	0.006022	0.012079	0.016442
S(202)			0.002973	0	0.004855	0.004293	0.004985	0.003299	0.011284	0.001537	0.000572	0.000314	0.000959	0.001722	0.003807	0.003323	0.001964	0.000865	0.000335	0.000146	0.000401	0.001215	0.003405	0.008219	0.018192
S(232)			0	0	3.8e-05	0.000425	0.000135	0.000638	0.000205	0.000162	0.000176	9.7e-05	5.9e-05	9e-05	0.000196	7e-06	6.4e-05	0.000133	0.000126	0.002413	0.002403	0.006274	0.005367	0.011422	0.010777
L(139)			0.00027	0	0.00128	0.000425	0.000404	0.005852	0.002052	0.001375	0.001012	0.000918	0.001604	0.001842	0.003485	0.004625	0.009645	0.012306	0.005886	0.005097	0.004792	0.002715	0.0031	0.003364	0.002842
T(135)			0.003784	0	0.000263	0.000213	0.002021	0.000532	0.001026	0.000243	0.001583	0.002439	0.00223	0.001722	0.002846	0.002919	0.002966	0.006935	0.013199	0.00219	0.001177	0.002462	0.003928	0.004823	0.00585
P(383)			0.000541	0	0.000979	0.001658	0.00229	0.007555	0.005334	0.001375	0.002595	0.00314	0.006612	0.005212	0.004414	0.004528	0.004326	0.007097	0.013672	0.003275	0.002485	0.003302	0.003683	0.002933	0.002116
P(80)			0	0	0.00064	0.000298	0.000539	0.000106	0.001026	0.000566	0.000264	0.000411	0.000352	0.000389	0.001303	0.003824	0.004862	0.010316	0.012359	0.008928	0.003802	0.000889	0.001006	0.001682	0.001575
A(152)			0.002162	0	0.000151	0.00068	0.000269	0.000532	0.001231	0.000647	0.000792	0.000411	0.000685	0.000958	0.001341	0.001595	0.002037	0.003369	0.002905	0.001481	0.00501	0.003972	0.004557	0.004794	0.004469
A(398)			0.008649	0	0.000414	0.00085	0.000674	0.001383	0.002257	0.047642	0.045918	0.030407	0.01921	0.006335	0.00222	0.00248	0.002815	0.002394	0.002191	0.002336	0.000672	0.001087	0.001175	0.001865	0.002231
P(13)			0.005405	0	0.001054	0.001403	0.00256	0.005001	0.002052	0.004287	0.005058	0.010989	0.011581	0.007233	0.00437	0.005183	0.006908	0.006098	0.004705	0.00267	0.001561	0.001121	0.001111	0.001567	0.001341
H(300)			0.001081	0	0.000339	0.000935	0.000808	0.000213	0.001026	0.001537	0.002023	0.003623	0.0018	0.001557	0.001961	0.002027	0.002023	0.001615	0.001762	0.001537	0.001055	0.001503	0.002275	0.006976	0.006404
P(207)			0.000811	0	0.000263	0.000255	0.001347	0.000638	0.001026	0.001294	0.000704	0.000242	0.000646	0.000195	0.001259	0.000125	0.00016	0.00015	0.000632	0.001565	0.002703	0.004062	0.004606	0.005876	0.006587
P(151)			0.000811	0	0.000151	0.000298	0.000943	0.002554	0.000205	0.000162	0.000924	0.000749	0.001174	0.001408	0.004769	0.004806	0.004354	0.003993	0.003764	0.001954	0.001404	0.001837	0.004478	0.003486	0.003027
P(326)			0.00027	0	0.000301	0.000425	0.001347	0.000106	0.00041	0.000404	0.00066	0.001642	0.001682	0.002486	0.001486	0.002954	0.006157	0.007472	0.005513	0.002802	0.001448	0.001441	0.002354	0.002584	0.003217
A(12)			0.001351	0	3.8e-05	0.000213	0.000135	0.000213	0	0.000728	0.000836	0.000725	0.001017	0.002636	0.002391	0.002341	0.002586	0.002475	0.001996	0.000953	0.000667	0.003899	0.004463	0.003946	0.004116
G(238)			0.002973	0	0.000602	0.000425	0.000539	0.000213	0	0.000324	0.000484	0.00058	0.001252	0.002201	0.002353	0.001672	0.000453	0.000363	0.000354	0.000953	0.002765	0.003962	0.005845	0.005283	0.003276
M(210)			0.002973	0	0.000226	0.00051	0.000674	0.000213	0.001026	0.001456	0.009808	0.006956	0.00358	0.001842	0.0011	0.00147	0.001694	0.001921	0.001787	0.003671	0.009632	0.003243	0.001555	0.001596	0.001363
R(385)			0.012432	0	0.000113	0.000255	0.000135	0.000319	0	0.019332	0.024938	0.016616	0.008353	0.005197	0.003548	0.002515	0.000719	0.002406	0.006132	0.007294	0.00348	0.001267	0.000576	0.000561	0.00034
T(366)			0.00027	0	3.8e-05	0.000383	0.001482	0.000851	0.00041	0.000324	0.000748	0.000676	0.000841	0.001557	0.001847	0.001728	0.002055	0.003773	0.004149	0.002225	0.000964	0.000927	0.001834	0.002951	0.005187
K(373)			0	0	0.000677	0.000425	0.001347	0.00266	0.004103	0.001618	0.000792	0.000266	0.000293	0.000434	0.000632	0.00032	0.00043	0.000462	0.000467	0.0008	0.00157	0.002448	0.004022	0.005531	0.005119
P(279)			0.00027	0	0.000301	8.5e-05	0.000674	0.000106	0.000205	0	0.000396	0.000266	0.000352	0.000839	0.002397	0.003748	0.003763	0.005446	0.004837	0.003053	0.001988	0.001243	0.001631	0.001955	0.002286
S(193)			0.001622	0	0.001844	0.003868	0.002021	0.002235	0.010669	0.011162	0.003783	0.001932	0.003365	0.003789	0.003833	0.004326	0.001607	0.001027	0.001017	0.000765	0.001321	0.001684	0.00235	0.0028	0.003159
R(209)			0.002162	0	0.000527	0.002125	0.001752	0.00149	0.00554	0.005905	0.004134	0.002947	0.003247	0.001483	0.001455	0.001546	0.000929	0.00086	0.000739	0.00356	0.009754	0.003187	0.001454	0.00161	0.00104
T(379)			0	0	0.000188	0.000298	0.000135	0.000532	0.000821	0.001537	0.000572	0.000942	0.002289	0.003564	0.00215	0.001149	0.001387	0.002712	0.00257	0.001273	0.000545	0.00134	0.002433	0.003245	0.004136
L(230)			0	0.001866	0.000226	0.00017	0	0.000106	0	8.1e-05	0.000132	0.000121	0.000117	0.000404	0.001278	0.001219	0.000874	0.001414	0.000897	0.000953	0.001779	0.002385	0.003107	0.003242	0.004792
A(211)			0.004054	0	0.000151	0.000765	0.001752	0.002022	0.003898	0.002993	0.002859	0.003212	0.003365	0.003834	0.00358	0.00645	0.005452	0.004425	0.003587	0.002156	0.000872	0.000854	0.000885	0.001089	0.000849
A(156)			0.000811	0.007463	0.001694	0.001318	0.000269	0.000106	0.001026	0.000162	0.000132	0.000507	0.000117	0.000509	0.00074	0.002271	0.005306	0.007841	0.006681	0.002837	0.001496	0.000628	0.001009	0.001283	0.000951
T(362)			0.006216	0	3.8e-05	0.000808	0	0.000851	0.003693	0.000566	0.000792	0.001666	0.000822	0.001348	0.00179	0.003364	0.003768	0.003698	0.002507	0.001432	0.000964	0.000809	0.001145	0.001506	0.003352
G(18)			0.00027	0	0.000301	0.00034	0.000674	0	0	0.001213	0.001276	0.000266	0.000215	0.000614	0.000923	0.000453	0.000838	0.001177	0.002273	0.004374	0.001814	0.002531	0.002584	0.002235	0.00284
R(14)			0.00027	0	7.5e-05	0.000298	0.000539	0.000532	0	0.000404	0.00044	0.000386	0.000567	0.000854	0.002365	0.002877	0.004248	0.003819	0.003429	0.002434	0.001203	0.001493	0.001563	0.0012	0.001139
H(145)			0.004595	0	0.000188	0.000383	0.000269	0.000213	0.00041	0.003883	0.007653	0.011061	0.011972	0.006455	0.004199	0.00303	0.002335	0.002042	0.002918	0.00137	0.001156	0.000559	0.000493	0.00051	0.000639
G(243)			0.00027	0	0.000151	0.00034	0.000269	0.000213	0.000616	0.000971	0.00066	0.002319	0.00446	0.002875	0.001942	0.002334	0.001964	0.001298	0.000581	0.000563	0.00133	0.002	0.001989	0.001833	0.002604
Q(289)			0	0	0.000376	0.000298	0.000943	0	0.000821	0.000728	0.0011	0.000628	0.00178	0.000779	0.001018	0.000474	0.000664	0.000917	0.000669	0.000918	0.001291	0.001802	0.001375	0.001513	0.005045
P(368)			0	0	0	0	0.000135	0	0	0.000485	0.000484	0.000676	0.000372	0.00024	0.00036	0.000279	0.000151	0.00019	0.000183	0.000181	0.00027	0.000493	0.0009	0.006714	0.004945
A(119)			0.001622	0	0.003011	0.00068	0.000404	0.000106	0.001436	0.000404	0.001012	0.000435	0.000802	0.001722	0.001727	0.001059	0.000797	0.001027	0.000714	0.000723	0.001103	0.001403	0.001853	0.003734	0.003104
P(6)			0	0	0.000452	0.00068	0.001482	0.004469	0.00041	0.000243	0.000924	0.001256	0.000743	0.000854	0.001347	0.001407	0.000778	0.000473	0.000366	0.000668	0.000344	0.000976	0.001533	0.002577	0.00482
G(96)			0.00027	0	0	8.5e-05	0.000135	0	0	8.1e-05	0.000528	2.4e-05	7.8e-05	0.000105	0.001682	0.008164	0.004788	0.001898	0.000802	0.003567	0.003126	0.000785	0.000776	0.000514	0.000443
Q(229)			0.003514	0	0.000151	8.5e-05	0.000404	0.000213	0.00041	0.002265	0.001627	0.000797	0.000626	0.000629	0.001467	0.000968	0.000842	0.00101	0.001206	0.001175	0.001173	0.001837	0.002493	0.002814	0.00265
N(8)			0.000541	0	0	8.5e-05	0.000404	0	0	0.000566	0.00066	0.000749	0.003991	0.003699	0.001448	0.001498	0.003209	0.007339	0.005488	0.001273	0.00075	0.000899	0.000384	0.000399	0.00041
A(90)			0.000811	0	0.000414	0.000298	0.000539	0.000426	0.001641	0.000647	0.000748	0.001039	0.001291	0.001363	0.000936	0.000871	0.000934	0.001321	0.001301	0.000967	0.001238	0.002597	0.002787	0.002282	0.00188
Q(389)			0.000811	0	0.000226	0.000425	0.000404	0.000745	0.000616	0.000162	0.00022	0.000435	0.000391	0.001228	0.001594	0.003803	0.003333	0.002902	0.004155	0.001815	0.000624	0.000854	0.000968	0.001197	0.000897
A(182)			0.001892	0	0.000339	0.000383	0.000135	0.000851	0.000821	0.003721	0.001759	0.001159	0.0009	0.001992	0.001126	0.001498	0.001144	0.000612	0.00089	0.00096	0.000964	0.001358	0.001732	0.002527	0.002402
K(370)			0	0	7.5e-05	0.000808	0	0	0	8.1e-05	0.000176	0.000169	0	7.5e-05	0.000316	0.000188	8.2e-05	8.7e-05	0.000139	0.000118	8.7e-05	0.000587	0.002666	0.004115	0.003994
A(208)			0.000541	0	7.5e-05	0.000128	0.000269	0.000319	0.000821	0.000324	0.000396	0.000193	0.000333	0.001213	0.001315	0.001491	0.002266	0.00225	0.00204	0.001071	0.000593	0.001389	0.001676	0.001908	0.001765
S(183)			0	0	3.8e-05	0	0.000135	0	0.000821	0.000162	0	0.000121	7.8e-05	4.5e-05	6.3e-05	3.5e-05	4.6e-05	1.2e-05	1.3e-05	0.000549	0.000187	0.000288	0.00113	0.003932	0.005013
R(195)			0.004054	0	0.001129	0.000978	0.005659	0.001383	0.003488	0.001294	0.001627	0.001666	0.001761	0.001483	0.002024	0.001581	0.000641	0.001414	0.001351	0.000612	0.001308	0.001305	0.001567	0.001865	0.001932
W(330)			0	0	0.000113	0.000213	0.000269	0.000106	0	0	0.000132	9.7e-05	0.000157	4.5e-05	0.000329	0.000146	0.000174	8.1e-05	8.8e-05	0.000223	0.005935	0.004597	0.002508	0.001186	0.000517
V(72)			0.006757	0	7.5e-05	0.00017	0.000404	0.002873	0.019081	0.008574	0.003299	0.004879	0.008549	0.005811	0.002353	0.001303	0.001387	0.001362	0.000897	0.000104	0.000157	0.000771	0.001345	0.001118	0.001086
G(34)			0	0	0.000753	0.000765	0.000808	0.00149	0.001847	0.003235	0.000924	0.001039	0.001174	0.00292	0.002144	0.001233	0.000417	0.000421	0.000442	0.000473	0.001182	0.002851	0.002584	0.001754	0.001032
A(252)			0.024054	0	0.000226	0.00034	0.000135	0	0.000616	0.000485	0.000352	0.004734	0.005732	0.001198	0.000797	0.000362	0.000481	0.000508	0.000783	0.000633	0.000519	0.000781	0.001164	0.001851	0.002731
A(35)			0	0	0.000565	0.000935	0.000269	0	0.00041	0.00089	0.0011	0.00128	0.000704	0.000824	0.001423	0.001957	0.000906	0.00075	0.000474	0.00064	0.000881	0.001153	0.001634	0.001438	0.002256
D(402)			0.000541	0	0.000376	0.000425	0.000269	0.001277	0.002257	0.001213	0.000484	0.000894	0.001174	0.001153	0.001081	0.001031	0.000952	0.000877	0.000707	0.000987	0.002355	0.002517	0.001634	0.001125	0.000982
P(67)			0.001081	0	7.5e-05	0.000298	0	0.000106	0.00041	0.000485	0.004398	0.002608	0.003658	0.005137	0.003346	0.003149	0.001671	0.001102	0.000935	0.000417	0.000222	0.000396	0.000448	0.000783	0.001237
A(173)			0.006757	0	3.8e-05	0.000213	0.000269	0.000106	0.000205	0	0.000132	4.8e-05	0.000372	0.000644	0.001271	0.003274	0.003172	0.002031	0.002545	0.001022	0.000475	0.000684	0.001058	0.000909	0.000752
D(144)			0.000811	0	0.000188	0.000978	0.001482	0.000745	0.007386	0.00275	0.003958	0.005024	0.001682	0.002696	0.002131	0.001797	0.000678	0.000681	0.000493	0.000508	0.000733	0.001337	0.001879	0.001049	0.001045
S(413)			0.000541	0	0.000376	0.000128	0.000269	0	0.000821	0.001052	0.003871	0.001497	0.001252	0.001692	0.001164	0.000871	0.000764	0.001246	0.00204	0.000674	0.000658	0.001295	0.001525	0.001474	0.001427
Q(418)			0	0	0.000263	0.000128	0.000135	0.000106	0.00041	0.000324	0.000264	0.000242	0.000939	0.000958	0.001056	0.001755	0.001689	0.001598	0.001743	0.000723	0.000558	0.001521	0.00096	0.001477	0.001282
G(212)			0.002703	0	0.000263	0.00051	0.001213	0.002128	0.005745	0.004611	0.000836	0.000725	0.001232	0.000749	0.000949	0.000711	0.00136	0.003825	0.00562	0.003692	0.000619	0.000323	0.000395	0.000208	0.000255
S(197)			0.002162	0.024254	0.038726	0.012751	0.004446	0.000958	0.000821	0.000243	0.000352	0.000169	0.000196	0.000539	0.00062	0.001881	0.001758	0.000848	0.00077	0.000348	0.000358	0.000715	0.000923	0.0006	0.000312
D(401)			0.005135	0	0.000414	0.000383	0.000269	0.002979	0.002052	0.002831	0.002111	0.00099	0.00358	0.003774	0.001562	0.001832	0.00108	0.00146	0.001055	0.0008	0.000462	0.001201	0.001548	0.00106	0.000591
A(359)			0.00027	0	0.000376	0.00034	0	0.000532	0.000821	0.009302	0.001232	0.001328	0.001956	0.000958	0.000968	0.000857	0.000893	0.000935	0.00132	0.00137	0.001138	0.00074	0.000987	0.001671	0.001366
K(374)			0	0	3.8e-05	0.000255	0.000269	0.000213	0.002052	0.008898	0.004354	0.000942	0.000626	0.000285	0.000424	0.00023	0.000169	0.000271	0.000259	0.000167	0.000562	0.001774	0.00177	0.001517	0.002268
A(251)			0	0	0.000828	0.000255	0.000808	0.001383	0.000205	0.000647	0.000924	0.000314	0.000215	0.000329	0.000582	0.000536	0.000362	0.000421	0.000366	0.001008	0.000955	0.001611	0.002282	0.001995	0.001518
T(334)			0.004865	0	0.000489	0.000213	0.001886	0.000532	0.003078	0.001132	0.002419	0.004637	0.004226	0.001468	0.000898	0.001038	0.001378	0.001644	0.001017	0.000577	0.000719	0.000559	0.000772	0.001502	0.001075
D(103)			0.007568	0	0.011291	0.028095	0.070736	0.033624	0.032007	0.007765	0.001979	0.000918	0.00223	0.001617	0.000708	0.000286	0.000151	0.000104	0.000208	0.000174	0.000231	0.000299	0.000358	0.000323	0.000556
P(142)			0.000541	0	0.000113	0.000128	0.000135	0.000213	0	0.000404	0.000308	0.000845	0.000998	0.000839	0.000892	0.000864	0.000842	0.001783	0.003814	0.001599	0.000349	0.000385	0.000471	0.000629	0.001438
G(200)			0	0	0	0	0	0	0.000205	0.000728	0.000704	0.000483	0.0009	0.000928	0.005547	0.003831	0.001314	0.000912	0.000985	0.00032	0.000222	0.00051	0.000712	0.000323	0.000595
G(179)			0.001081	0	0.000113	0.001743	0.001347	0.000319	0.00041	0.000324	0.000352	0.000507	0.000763	0.000988	0.000455	0.000376	0.000293	0.000519	0.000537	0.002865	0.002642	0.000844	0.000855	0.001553	0.000927
E(378)			0.002703	0	0.000527	0.00017	0.000135	0	0.00041	0.000485	0.000308	0.000821	0.001506	0.000914	0.000765	0.001553	0.000902	0.00109	0.001781	0.002336	0.003702	0.000208	7.9e-05	0.000273	0.000545
T(417)			0.00027	0	0.000414	0.000128	0.001078	0	0	8.1e-05	0.000132	0.000169	0.000157	0.000225	0.000436	0.000265	0.00043	0.000202	0.000208	0.00057	0.000946	0.000632	0.000874	0.001686	0.002504
S(33)			0.000541	0	0.000188	0.00017	0.000539	0.00149	0.001641	0.000566	0.001803	0.006618	0.004871	0.004672	0.002587	0.000787	0.000829	0.000554	0.000467	0.000459	0.000275	0.000517	0.000787	0.000575	0.000715
T(391)			0.00027	0	3.8e-05	0.001148	0	0.000532	0.000821	0.000404	0.000616	0.001039	0.002602	0.002935	0.001727	0.001693	0.001035	0.000865	0.000474	0.000501	0.001609	0.000306	0.000565	0.000848	0.000886
R(32)			0.001351	0	0.000263	0.000255	0.000135	0.000213	0	0.000243	0.000968	0.001304	0.002445	0.002606	0.000942	0.000286	0.000233	0.000237	0.000461	0.002107	0.001077	0.000858	0.00136	0.001103	0.001008
T(24)			0.00027	0.001866	0.00222	0.00051	0.000539	0.000426	0.000616	0.000647	0.000484	0.001039	0.000665	0.000554	0.000576	0.000571	0.000536	0.000565	0.000979	0.000688	0.000445	0.000892	0.001371	0.001308	0.001381
G(236)			0	0	0.000188	4.3e-05	0	0	0	0.000243	8.8e-05	0.000242	0.000528	0.001093	0.001151	0.00147	0.001337	0.001137	0.001156	0.000619	0.000166	0.000309	0.000595	0.00087	0.001492
A(55)			0.00027	0	3.8e-05	0.001785	0.001617	0.000213	0.000205	0.000566	0.000264	0.002246	0.002191	0.000734	0.000708	0.000488	0.0007	0.000802	0.000726	0.000535	0.000672	0.000913	0.001058	0.000633	0.001283
S(187)			0.002432	0	0.000151	0.00051	0	0.000319	0.012926	0.013832	0.007125	0.002947	0.002171	0.001857	0.001353	0.001825	0.001465	0.001056	0.000657	0.000327	0.000126	9e-05	0.000143	0.000618	0.000593
T(141)			0.00027	0	3.8e-05	0.000128	0.000943	0.000532	0.000821	0.000324	0.000396	0.00128	0.001545	0.001258	0.001442	0.000822	0.000792	0.001281	0.000859	0.000758	0.000567	0.000465	0.000659	0.000952	0.000951
P(46)			0.000541	0	0.000151	0.000128	0.000135	0.000106	0.000205	0.000243	0.00022	0.000411	0.000606	0.000419	0.000765	0.000627	0.000678	0.000352	0.000278	0.000236	0.00051	0.001344	0.001194	0.0012	0.001261
P(168)			0.001892	0	0.000602	0.001105	0.002829	0.000319	0.000205	0.000647	0.000792	0.001183	0.001898	0.001213	0.001113	0.001435	0.001218	0.000923	0.000512	0.000487	0.000933	0.000674	0.000633	0.000633	0.00067
S(37)			0	0	0.000188	0.000425	0.000404	0.000319	0.008002	0.000324	0.000396	0.0007	0.000411	0.000674	0.000386	0.000613	0.00081	0.00386	0.003019	0.000876	0.000214	0.000187	0.00032	0.000385	0.000517
Q(7)			0.000811	0	0.000452	0.000255	0.000674	0.000851	0.002257	0.000971	0.000616	0.001377	0.002876	0.00277	0.001278	0.000808	0.000632	0.000288	0.000246	0.000188	0.000288	0.00091	0.001469	0.000866	0.000519
A(273)			0.000541	0	7.5e-05	0	0.000135	0	0.000616	0.001213	0.000176	0.001208	0.000763	0.000359	0.000304	0.000613	0.001341	0.000877	0.000543	0.000292	0.001731	0.000719	0.000768	0.00087	0.00068
Q(384)			0.001351	0	0.000113	0.00034	0.001078	0.000319	0.00041	0.002993	0.001803	0.000821	0.000352	0.000404	0.000342	0.000195	0.000288	0.000162	0.000827	0.000605	0.001108	0.000625	0.000452	0.000456	0.001734

## Sheet: North America
	2019-11-30	2019-12-31	2020-01-31	2020-02-29	2020-03-31	2020-04-30	2020-05-31	2020-06-30	2020-07-31	2020-08-31	2020-09-30	2020-10-31	2020-11-30	2020-12-31	2021-01-31	2021-02-28	2021-03-31	2021-04-30	2021-05-31	2021-06-30	2021-07-31	2021-08-31	2021-09-30	2021-10-31	2021-11-30
R(203)			0.083516	0.044444	0.082407	0.1444	0.202341	0.263412	0.193119	0.211197	0.195612	0.217092	0.13393	0.128876	0.205671	0.301466	0.552826	0.758145	0.842649	0.901583	0.973572	0.99398	0.996934	0.997793	0.997401
D(377)			0.010989	0.007407	0.000585	0.004247	0.002308	0.001709	0.004753	0.006281	0.03522	0.047707	0.062225	0.065701	0.104792	0.076137	0.048432	0.0247	0.053393	0.448928	0.917171	0.984753	0.988352	0.991562	0.995413
D(63)			0	0	5.8e-05	0.000307	0.001071	0.000297	0.004017	0.001457	0.000972	0.000308	0.000561	0.001054	0.031106	0.004039	0.002042	0.007998	0.047955	0.442839	0.91371	0.985387	0.994331	0.995587	0.996089
G(215)			0.004396	0	0.000175	0.000102	0.00033	0.000149	0.002433	0.001912	0.003562	0.00159	0.001447	0.001411	0.027598	0.001653	0.000752	0.002989	0.024374	0.296411	0.686528	0.798994	0.871221	0.923577	0.954347
G(204)			0.085714	0.044444	0.082115	0.14399	0.202093	0.261703	0.188593	0.208011	0.19383	0.215605	0.131774	0.127008	0.173311	0.298813	0.550098	0.747685	0.794168	0.457006	0.055635	0.007023	0.001308	0.000561	0.00091
S(235)			0.01978	0	0.000409	0.001791	0.005357	0.009511	0.010411	0.01939	0.028824	0.020468	0.012551	0.0198	0.063512	0.188042	0.430327	0.611855	0.637939	0.33996	0.03567	0.003712	0.000597	0.000149	0.000127
D(3)			0.021978	0	0.000526	0.000614	0.001401	0.000817	0.002377	0.001001	0.003562	0.001077	0.002274	0.0165	0.063082	0.186922	0.430386	0.611844	0.638743	0.340226	0.035948	0.003967	0.000718	0.000243	0.000655
P(199)			0.389011	0.014815	0.000585	0.001228	0.002308	0.045178	0.100549	0.152481	0.171403	0.208064	0.334987	0.336792	0.347155	0.317971	0.183376	0.088841	0.047042	0.019004	0.002218	0.001022	0.001516	0.001775	0.001856
P(67)			0.386813	0.014815	0.000994	0.001126	0.000989	0.041165	0.09721	0.149386	0.166626	0.203652	0.329937	0.331703	0.341011	0.293534	0.126252	0.023938	0.00653	0.002646	0.000857	0.000536	0.000939	0.001123	0.002566
T(205)			0.013187	0	0.001696	0.002303	0.003791	0.010626	0.024614	0.024488	0.024613	0.028265	0.030389	0.089476	0.164088	0.182242	0.161154	0.093069	0.062057	0.047635	0.017685	0.004155	0.002455	0.001716	0.001914
M(234)			0.01978	0	0.000409	0.000716	0.003132	0.001709	0.003904	0.003641	0.011335	0.017749	0.025221	0.070233	0.098636	0.123264	0.156237	0.132066	0.085995	0.039746	0.007449	0.002964	0.001671	0.001645	0.001381
S(194)			0.098901	0.014815	0.003334	0.016118	0.047474	0.090504	0.112714	0.207556	0.196097	0.220683	0.233277	0.206167	0.148907	0.096454	0.031703	0.010135	0.012128	0.018034	0.004783	0.001727	0.001378	0.001626	0.001873
P(80)			0	0	0.000117	0.000256	0.000412	0.00052	5.7e-05	0	0.000567	0.000462	0.000473	0.000696	0.000976	0.002946	0.032418	0.089127	0.125573	0.102722	0.018848	0.003358	0.000884	0.000644	0.000806
G(18)			0	0	0.000234	0.001586	0.001896	0.00052	0.000566	0.001639	0.000648	0.001129	0.000591	0.000775	0.001649	0.0008	0.001644	0.001469	0.00137	0.008391	0.037202	0.035544	0.030626	0.020764	0.013586
A(208)			0	0	0.011639	0.00921	0.002967	0.000892	0.000679	0.004096	0.000648	0.000975	0.000591	0.000676	0.00216	0.000467	0.000501	0.000796	0.00126	0.002004	0.021894	0.024664	0.025786	0.025146	0.025992
P(13)			0.002198	0	0.005556	0.002507	0.003132	0.001189	0.002603	0.002276	0.003643	0.005899	0.010366	0.010496	0.012916	0.017264	0.027921	0.03442	0.032324	0.014715	0.003172	0.001643	0.002234	0.003432	0.00289
S(412)			0.008791	0	0	0.000154	0.001071	0.000223	5.7e-05	0.000182	0.000162	5.1e-05	0.000354	0.000954	0.000755	0.000893	0.000383	0.000252	0.000566	0.001753	0.005634	0.02343	0.020839	0.014941	0.006556
S(202)			0.002198	0.007407	0.005673	0.004094	0.001566	0.001337	0.010015	0.009467	0.015302	0.003386	0.004873	0.005109	0.00798	0.015358	0.026181	0.031425	0.027729	0.009518	0.000862	0.000317	0.000753	0.002109	0.005704
K(373)			0	0	5.8e-05	0.000409	0.000247	0.000743	0.000396	0.001821	0.001295	0.000718	0.003042	0.004592	0.001615	0.001866	0.001718	0.000673	0.002283	0.026549	0.013679	0.014345	0.008721	0.007625	0.00868
Q(9)			0.002198	0.007407	0.000175	0.001433	0.00305	0.000669	0.003282	0.00528	0.003158	0.026418	0.019728	0.019501	0.015646	0.009839	0.003915	0.000724	0.000595	0.000845	0.004233	0.005423	0.005299	0.007963	0.014254
A(220)			0.028571	0	5.8e-05	0	0.000989	0.000223	0.001471	0.007647	0.111651	0.143429	0.098993	0.105618	0.024253	0.010612	0.000892	0.000252	0.001399	0.001049	0.000284	0.00012	0.000169	0.000157	0.000209
T(391)			0.008791	0.007407	0.000292	0.000102	0.000247	0.000669	0.003508	0.009558	0.011092	0.022058	0.037979	0.040593	0.034125	0.02801	0.009201	0.002939	0.001995	0.004853	0.001481	0.001068	0.001191	0.00126	0.001939
T(135)			0	0.007407	0.000117	0.000102	0.000907	0.00052	0.00215	0.004916	0.003158	0.006258	0.010838	0.018786	0.01553	0.009545	0.004335	0.001587	0.002501	0.001972	0.002979	0.002905	0.004733	0.007197	0.007698
S(327)			0	0.014815	0.001053	0.000768	0.000742	0.000446	0.001075	0.000455	0.000324	0.000923	0.001329	0.002525	0.003694	0.004773	0.003812	0.002159	0.001568	0.003428	0.005191	0.005534	0.008023	0.008042	0.006908
D(401)			0	0	0.000351	0.004605	0.00478	0.001412	0.003848	0.003732	0.00421	0.010567	0.010602	0.017971	0.021964	0.02569	0.017827	0.010948	0.006292	0.003366	0.00042	0.000428	0.000666	0.000491	0.000297
P(383)			0	0	0.000819	0.00133	0.001236	0.015307	0.01788	0.007374	0.002996	0.003386	0.004755	0.006699	0.009896	0.010759	0.009142	0.009978	0.008495	0.009565	0.003069	0.002081	0.001788	0.002097	0.001777
P(365)			0	0	0.000117	0.000716	0.001484	0.000446	0.000849	0.001365	0.001295	0.00118	0.001654	0.002346	0.004054	0.004933	0.00539	0.004896	0.005955	0.006449	0.002389	0.002037	0.005382	0.006656	0.005993
T(362)			0	0	0	0.000716	0.001978	0.001412	0.00034	0.001183	0.002591	0.003129	0.003869	0.003141	0.003229	0.004839	0.003686	0.002187	0.001975	0.002004	0.003937	0.004096	0.005009	0.005442	0.004931
Q(389)			0.002198	0	0	0.000154	0.000412	7.4e-05	0.002207	0.003641	0.004291	0.010054	0.012138	0.016082	0.019537	0.017451	0.008235	0.003662	0.003086	0.001785	0.001169	0.00084	0.000915	0.001213	0.00074
P(207)			0.004396	0.007407	0.000234	0.00087	0.003626	0.001858	0.009223	0.015294	0.011335	0.01385	0.022208	0.02968	0.023788	0.012692	0.003723	0.000679	0.000357	0.000313	0.000641	0.000557	0.000577	0.000428	0.001191
A(211)			0	0	5.8e-05	0.000768	0.00033	0.002972	0.001867	0.007829	0.003077	0.012055	0.009332	0.015049	0.015135	0.006892	0.003251	0.002978	0.005955	0.005275	0.002275	0.001804	0.001371	0.001771	0.001295
S(183)			0.01978	0	0.004854	0.006857	0.015165	0.040199	0.069145	0.048703	0.069387	0.027085	0.035852	0.015724	0.007654	0.00232	0.000487	0.000157	0.000278	0.000125	3.4e-05	0.00016	0.000207	0.000291	0.000358
S(413)			0	0	5.8e-05	0.000154	0.000247	0.00052	0.000509	0.000728	0.000648	0.000923	0.001388	0.002366	0.003322	0.00224	0.001769	0.002541	0.007116	0.006371	0.001549	0.00112	0.002548	0.003145	0.005784
T(366)			0	0	0.000175	0.00087	0.000907	0.002452	0.001132	0.002003	0.000972	0.000718	0.002126	0.003558	0.003577	0.004493	0.003259	0.002563	0.003424	0.005463	0.001935	0.001299	0.001992	0.002859	0.00547
Q(418)			0.002198	0	0.000175	0.000819	0.001154	0.000149	0.000396	0.000546	0.000324	0.000154	0.00192	0.001849	0.003833	0.012025	0.014362	0.007796	0.003474	0.001393	0.000488	0.000886	0.001108	0.001096	0.000693
A(152)			0.017582	0	0.000175	0.001996	0.001401	0.000372	0.00034	0.00091	0.015221	0.000975	0.001211	0.000994	0.001278	0.001346	0.00129	0.001498	0.002104	0.00288	0.003915	0.00309	0.002955	0.003098	0.003737
T(379)			0	0	0.000409	0.000512	0.000412	0.005424	0.004017	0.00091	0.002429	0.002514	0.005345	0.004652	0.005157	0.004719	0.002639	0.001638	0.002203	0.004101	0.00194	0.001043	0.001712	0.002815	0.003853
S(193)			0.004396	0	0.01737	0.011053	0.004451	0.004756	0.006337	0.004916	0.004615	0.002462	0.001063	0.001312	0.001731	0.001546	0.001261	0.00092	0.000784	0.001221	0.001356	0.001936	0.002444	0.003663	0.004252
A(398)			0.002198	0	0.000234	0.000512	0.000659	0.000446	0.002263	0.006099	0.00753	0.006977	0.005286	0.005705	0.003461	0.003506	0.006577	0.008267	0.005548	0.003428	0.000806	0.00068	0.000911	0.00108	0.000985
S(190)			0.002198	0	0.001638	0.00133	0.003626	0.028087	0.048322	0.034046	0.018136	0.018519	0.019728	0.012623	0.00906	0.007292	0.003192	0.000785	0.000208	7.8e-05	6.2e-05	0.000182	0.000162	5.9e-05	7.2e-05
A(119)			0	0	0.000585	0.00133	0.002885	0.000372	0.000396	0.001548	0.000972	0.001795	0.002215	0.005228	0.007968	0.009492	0.005176	0.001312	0.000734	0.001878	0.000908	0.000736	0.001039	0.001516	0.003407
R(14)			0	0	5.8e-05	0.000716	0.000989	0.000669	0.000226	0.000455	0.001053	0.001949	0.001713	0.000537	0.000755	0.005479	0.003266	0.004223	0.004218	0.002959	0.001152	0.000988	0.001754	0.002297	0.002068
A(90)			0	0	0.000175	0.000102	8.2e-05	0.000297	0.000396	0.000637	0.000567	0.000769	0.001034	0.000736	0.00108	0.000613	0.001062	0.001385	0.001985	0.002082	0.001067	0.001517	0.002772	0.00384	0.003482
P(364)			0.002198	0	0.00117	0.001382	0.000907	0.001486	0.00481	0.006827	0.004048	0.012517	0.027583	0.010118	0.007945	0.005506	0.002603	0.000707	0.000724	0.000313	0.00034	0.00032	0.000501	0.000868	0.001367
S(206)			0	0	0.000117	0.000512	0.001648	0.006019	0.004074	0.007374	0.006153	0.0079	0.02277	0.009303	0.008502	0.009545	0.003274	0.000314	9.9e-05	0.000454	0.000448	0.000631	0.000856	0.000628	0.000564
A(376)			0.008791	0	0.000117	5.1e-05	0	0.000149	0.000113	0.001274	0.000972	0.008618	0.011429	0.018686	0.017736	0.007906	0.002698	0.000538	0.000248	0.000282	0.000227	0.000231	0.000228	0.00042	0.000347
D(144)			0	0	0.000936	0.001791	0.002473	0.001635	0.002716	0.001912	0.00081	0.002719	0.002599	0.002704	0.005227	0.004359	0.003133	0.002451	0.002025	0.000736	0.000828	0.000896	0.001716	0.001826	0.001711
P(6)			0	0	0.000234	5.1e-05	0.000495	0.000892	0.00034	0.00091	0.00081	0.000513	0.000768	0.00161	0.002184	0.0032	0.004637	0.002462	0.002104	0.001127	0.000772	0.001188	0.002165	0.001952	0.001865
D(402)			0.002198	0	0.000351	0.000358	0.00033	0.00104	0.001754	0.008739	0.002024	0.002001	0.00378	0.00324	0.002753	0.00276	0.00216	0.002888	0.007245	0.006888	0.001662	0.000834	0.000846	0.00086	0.000583
M(210)			0.004396	0	5.8e-05	0.000102	0.00033	0.000297	0.000566	0.001639	0.001214	0.004668	0.005375	0.012067	0.010268	0.007079	0.002345	0.00106	0.000625	0.000454	0.000335	0.000526	0.000732	0.000993	0.001392
G(30)			0	0	0.009767	0.006447	0.007088	0.006539	0.002546	0.007374	0.002996	0.012209	0.008742	0.013677	0.013195	0.005106	0.000944	0.000359	0.000228	0.000141	0.000153	0.000379	0.000425	0.000369	0.000407
S(187)			0.002198	0	0.000526	0.001023	0.000412	0.000372	0.001584	0.006281	0.006558	0.008669	0.006202	0.004453	0.003543	0.007372	0.009312	0.004509	0.000903	0.000219	0.000216	6.8e-05	0.000124	0.000145	9.1e-05
H(300)			0	0	0.000234	0.000307	0.000412	0.000966	0.001528	0.002003	0.002429	0.001077	0.001565	0.001093	0.001487	0.00208	0.002728	0.00304	0.002441	0.001706	0.000987	0.001296	0.001592	0.001425	0.001994
T(271)			0	0	0.000117	0.000154	0.000495	0.001115	0.001301	0.002913	0.002348	0.002514	0.001063	0.002385	0.001266	0.001626	0.002905	0.005917	0.004188	0.002348	0.001231	0.000788	0.000846	0.000982	0.000952
N(213)			0	0	0.000117	0.000154	0	0.000223	0.000396	0	8.1e-05	0.000205	0.000177	0.000179	0.000627	0.000973	0.001504	0.002771	0.008237	0.014527	0.004142	0.000843	0.000186	8.2e-05	0.000179
E(378)			0	0	5.8e-05	5.1e-05	8.2e-05	0.003047	0.000679	0.002003	0.000486	0.001795	0.004282	0.007375	0.010047	0.012625	0.005279	0.00175	0.000992	0.000501	0.000119	5.8e-05	7.6e-05	9e-05	6.3e-05
R(209)			0.008791	0.007407	0.000585	0.003275	0.013517	0.020211	0.014995	0.015294	0.007611	0.008823	0.007678	0.005984	0.00417	0.003413	0.001467	0.000813	0.001082	0.001205	0.00046	0.000369	0.000535	0.000707	0.000564
D(371)			0.008791	0	5.8e-05	0.000205	0.00206	7.4e-05	0.00034	0.00173	0.00332	0.007489	0.011075	0.014432	0.011604	0.007919	0.002389	0.000421	0.000109	0.00011	0.000244	0.000274	0.000207	0.00013	0.000176
R(32)			0.054945	0	0.007018	0.013662	0.014836	0.011517	0.012618	0.019481	0.005344	0.008669	0.002067	0.001849	0.001324	0.002533	0.001762	0.000583	0.000298	0.000235	0.000386	0.000652	0.001371	0.001088	0.001001
R(195)			0.004396	0	0.000234	0.000665	0.001566	0.000817	0.001019	0.002094	0.001053	0.002308	0.001861	0.001551	0.001707	0.001147	0.001858	0.003051	0.004793	0.003162	0.000772	0.000736	0.001008	0.001335	0.001496
A(414)			0	0	5.8e-05	0.000102	8.2e-05	0.000149	0.00232	0.010651	0.0017	0.002924	0.005788	0.002048	0.004321	0.004479	0.003207	0.001638	0.001419	0.001722	0.000522	0.000942	0.000898	0.000938	0.001053
G(179)			0	0	0.000351	0	8.2e-05	0.000743	0.001245	9.1e-05	0	0.000462	0.000118	0.000497	0.000534	0.000493	0.000206	0.000258	0.000109	0.000266	0.00042	0.00117	0.002044	0.002772	0.003982
S(197)			0	0.007407	0.003041	0.003582	0.00511	0.001635	0.001075	0.000728	0	0.001642	0.001358	0.00159	0.002637	0.003253	0.004416	0.004044	0.004416	0.004821	0.001594	0.000335	9.7e-05	7.9e-05	0.000179
A(35)			0.002198	0	0.000702	0.000665	0.004533	0.001115	0.001471	0.001001	0.000486	0.000256	0.000975	0.00157	0.001951	0.001973	0.001076	0.000673	0.000744	0.001299	0.001435	0.001493	0.001661	0.002065	0.001821
Q(229)			0	0	0.000117	0.000614	0.003462	0.000446	0.001132	0.000182	0.000729	0.000513	0.000532	0.000755	0.000569	0.00052	0.00056	0.000858	0.001211	0.002332	0.001906	0.001511	0.001809	0.001818	0.002217
P(151)			0	0	0.000409	0.000154	0.000495	0.000817	0.000453	0.002185	0.000648	0.000154	0.00065	0.000576	0.001359	0.001346	0.00115	0.000639	0.001062	0.000595	0.001146	0.001379	0.001578	0.001842	0.002536
G(243)			0	0	5.8e-05	0.000256	0.000907	0.000446	0.000566	0.000546	0.000486	0.000256	0.001034	0.000755	0.001382	0.001453	0.001917	0.002821	0.003394	0.001612	0.00063	0.000834	0.001022	0.001202	0.001796
Q(7)			0.002198	0	5.8e-05	0.000154	0.001236	0.002675	0.000679	0.000819	0.003077	0.010516	0.019757	0.007693	0.004181	0.0026	0.001327	0.000415	0.000308	0.000204	0.000386	0.000496	0.000653	0.000766	0.000913
A(182)			0	0	0	0.000154	0.000577	0.001709	0.000792	0.003004	0.008825	0.007079	0.004518	0.003976	0.00266	0.003573	0.001298	0.000752	0.000893	0.000751	0.000295	0.000517	0.00086	0.001272	0.001906
K(127)			0	0	0	0	0	0	0	9.1e-05	8.1e-05	0	5.9e-05	0.000159	0.000186	0.00016	0.000103	6.2e-05	0.000258	0.000611	1.7e-05	0.001754	0.002147	0.00278	0.002943
T(24)			0.002198	0	0.000877	0.000409	0.00033	0.001635	0.001528	0.00264	0.000324	0.000359	0.001949	0.002882	0.002753	0.00276	0.002448	0.002283	0.000794	0.000892	0.000607	0.000997	0.001302	0.001162	0.000869
E(136)			0	0	5.8e-05	0.000154	0.000247	0.000446	0.00017	9.1e-05	0.006477	0.00041	0.000827	0.000676	0.000871	0.000693	0.003296	0.004874	0.005359	0.002771	0.000845	0.000437	0.000476	0.00044	0.000514
G(238)			0.002198	0	0.000351	0.000716	0.002637	0.008471	0.004753	0.004552	0.001943	0.001949	0.002392	0.002922	0.002102	0.00336	0.00104	0.000679	0.000685	0.000501	0.000726	0.000997	0.001353	0.001406	0.00126
T(334)			0.002198	0	0.000234	0.000154	0.000742	0.001635	0.002829	0.002458	0.002105	0.003745	0.002747	0.004413	0.002184	0.00172	0.00244	0.002698	0.001846	0.000657	0.000386	0.000468	0.000911	0.00126	0.000754
N(8)			0	0	5.8e-05	0.000102	0.000165	0.000297	0.001641	0.00173	0.000648	5.1e-05	0.000443	0.000755	0.000662	0.00112	0.003251	0.004403	0.006491	0.004868	0.000443	0.000191	0.000221	0.000479	0.000404
V(270)			0	0	5.8e-05	0.000102	0.000165	0.001115	0.002037	0.00173	0.002429	0.000769	0.000768	0.000914	0.00122	0.001147	0.000782	0.000864	0.000903	0.000908	0.001594	0.001126	0.001243	0.001857	0.001735
P(279)			0	0	0.000175	0.000102	0.000165	0.000297	0.000283	9.1e-05	0.000567	0.000359	0.001004	0.000576	0.001127	0.001187	0.00073	0.000353	0.000506	0.000751	0.000664	0.000997	0.001471	0.002081	0.002541
L(230)			0	0	5.8e-05	0	0.000577	0.000669	0.00034	0.000273	8.1e-05	0.000256	8.9e-05	0.000636	0.000244	0.000347	0.000177	0.000252	0.000595	0.000297	0.000601	0.000957	0.00146	0.002034	0.003149
L(139)			0	0	0.000877	0.000307	0.000495	0.00104	0.000736	0.001274	0.000567	0.000975	0.002038	0.004016	0.003566	0.002093	0.000863	0.000617	0.001628	0.002583	0.001447	0.000911	0.001025	0.000797	0.000825
G(212)			0	0	0.000117	0.000307	0.001154	0.000892	0.00249	0.002276	0.002267	0.006566	0.006202	0.00322	0.002428	0.001506	0.001135	0.001632	0.00264	0.002833	0.001203	0.000536	0.000604	0.000561	0.000369
P(326)			0.002198	0	0.000234	0.000461	0.000412	0.000669	0.000905	0.001274	0.000729	0.000205	0.00065	0.001392	0.002242	0.001933	0.001113	0.000903	0.001747	0.001237	0.000573	0.000634	0.00107	0.001527	0.001551
P(142)			0	0	0.000175	0.000154	0	7.4e-05	0.000736	0.000364	0.000486	0.000154	0.000591	0.000557	0.001057	0.000827	0.000848	0.000942	0.000893	0.000548	0.000369	0.000554	0.001253	0.001626	0.002555
P(122)			0	0	0.000468	0.000154	0.000659	0.002303	0.002829	0.008102	0.000891	0.001693	0.00062	0.000974	0.000755	0.00016	8.1e-05	0.000107	0.000169	0.000344	0.002139	0.002013	0.001826	0.000997	0.000875
A(252)			0	0.014815	0.000234	0.000972	0.000742	0.000223	0.00034	0.00091	0.004453	0.003334	0.000856	0.000636	0.000732	0.00068	0.000575	0.000864	0.001042	0.000266	0.000369	0.000849	0.000991	0.001771	0.001801
Q(289)			0	0	0.000234	0.000154	0.000577	0.000297	0.002207	0.001457	0.00251	0.001539	0.000679	0.000775	0.001022	0.00076	0.000686	0.000561	0.000844	0.000204	0.000374	0.000772	0.000974	0.001469	0.00181
A(218)			0	0	0.000117	0	8.2e-05	7.4e-05	0.000453	9.1e-05	0	0.000103	0.000148	0.000199	0.000163	0.000107	0.000347	0.001195	0.002034	0.001158	0.000182	0.00016	0.000704	0.001806	0.002351
R(385)			0	0	0	5.1e-05	0.000412	0.000743	0.000226	0.001092	0.000162	0.001488	0.000443	0.000298	0.000674	0.000333	0.000428	0.00175	0.002372	0.003585	0.001855	0.001062	0.000594	0.00062	0.000468
S(37)			0.002198	0	5.8e-05	0.001279	0.005605	0.000966	5.7e-05	0.000364	8.1e-05	0	0.000236	0.000576	0.00079	0.000627	0.001607	0.001924	0.001151	0.003068	0.000641	0.000412	0.000621	0.000691	0.000949
G(34)			0	0	0.000994	0.001023	0.005605	0.001709	0.002094	0.003914	0.002753	0.001334	0.000856	0.001769	0.00079	0.000573	0.000546	0.000662	0.000883	0.000454	0.000477	0.000582	0.000905	0.001088	0.001051
T(16)			0.002198	0	0	0.000716	0.000742	0.000297	0.000509	0.000364	0.000243	0.000308	0.000413	0.000616	0.001138	0.001	0.00084	0.000247	0.000129	0.000564	0.001889	0.002081	0.000911	0.000499	0.000278
G(25)			0	0	0	0	0.000165	0.000372	5.7e-05	0.00355	0.005425	0.002001	0.002422	0.000914	0.000488	0.000347	0.00031	0.000252	0.000357	0.000579	0.000528	0.000785	0.000663	0.001241	0.001675
A(336)			0.002198	0	0	0.000358	8.2e-05	0.000223	0.00017	0	0.000162	0.000103	0.000177	0.000358	0.000604	0.00108	0.000782	0.00083	0.003196	0.008422	0.000687	0.000323	0.000476	0.000715	0.000292
A(251)			0	0	0.000175	0.000461	0.001566	0.001486	0.001584	0.00091	0.001295	0.001898	0.001565	0.001014	0.000488	0.000493	0.000538	0.000583	0.000486	0.000579	0.000817	0.000825	0.000842	0.001119	0.001133
P(168)			0.002198	0	0.000117	0.000921	0.000412	0.001858	0.000905	0.002094	0.000567	0.001539	0.000886	0.002564	0.003008	0.001227	0.000723	0.000606	0.000615	0.000517	0.000494	0.000646	0.00097	0.000785	0.000616
R(40)			0	0	0.000643	0.000307	0.00033	0.002006	0.000962	0.000819	0.000891	0.000308	0.000384	0.000378	0.000279	0.00024	0.000361	0.000443	0.000675	0.001064	0.000721	0.001145	0.001125	0.001009	0.001111
G(214)			0	0	0	0.000307	8.2e-05	0	0.000283	0	0.000243	5.1e-05	0.000177	0.000398	0.000523	0.00112	0.001209	0.002053	0.002878	0.00407	0.001373	0.000437	0.000445	0.000263	0.000184
A(156)			0.002198	0	0.000468	0.000102	0.000412	0	0.000283	0.000182	0.000324	0.000308	0.000502	0.000139	0.000209	0.000627	0.001172	0.002255	0.002293	0.002019	0.000567	0.000431	0.000542	0.000872	0.000646
A(359)			0	0	5.8e-05	0.000154	0	0.000892	0.001301	0.001183	0.000162	0.000616	0.000709	0.000497	0.000987	0.000653	0.000442	0.000796	0.001092	0.001456	0.000755	0.000668	0.000687	0.000722	0.001367
D(399)			0	0	0.000117	5.1e-05	8.2e-05	0.000594	0.002263	0.001639	0.002591	0.001847	0.002717	0.001411	0.002277	0.002826	0.00104	0.000841	0.001012	0.000517	0.000284	0.000474	0.000435	0.000444	0.000682
G(236)			0	0	0.000117	5.1e-05	0.000577	0.000297	0	0.001548	0.000486	0.000103	0.000118	0.000278	0.00043	0.001	0.000811	0.001284	0.002114	0.003209	0.001055	0.000412	0.000497	0.000703	0.000649

## Sheet: Occeania
	2019-11-30	2019-12-31	2020-01-31	2020-02-29	2020-03-31	2020-04-30	2020-05-31	2020-06-30	2020-07-31	2020-08-31	2020-09-30	2020-10-31	2020-11-30	2020-12-31	2021-01-31	2021-02-28	2021-03-31	2021-04-30	2021-05-31	2021-06-30	2021-07-31	2021-08-31	2021-09-30	2021-10-31	2021-11-30
R(203)			0.555556	0	0.147966	0.137815	0.171642	0.880623	0.992904	0.995581	0.970692	0.757463	0.211864	0.169329	0.51341	0.753846	0.548872	0.693364	0.661808	0.920308	0.996787	0.999844	1	0.999542	1
D(377)			0	0	0	0	0	0	0.000161	0.000221	0	0.078358	0.067797	0.019169	0.103448	0.076923	0.037594	0.352403	0.501458	0.865039	0.989194	0.999377	1	0.999771	0.999681
D(63)			0	0	0	0	0	0	0	0.001326	0	0	0	0	0.072797	0.061538	0.018797	0.2746	0.311953	0.81491	0.98861	0.998286	1	1	0.996653
G(215)			0	0	0	0	0	0	0.001129	0.000663	0	0.003731	0.008475	0	0.072797	0.061538	0.015038	0.125858	0.230321	0.764781	0.975759	0.993613	0.997937	0.996566	0.997131
G(204)			0.555556	0	0.147072	0.136134	0.171642	0.878893	0.992904	0.995139	0.970692	0.753731	0.211864	0.172524	0.436782	0.692308	0.518797	0.343249	0.166181	0.05527	0.007593	0.000467	0	0	0.000319
P(151)			0	0	0	0.001681	0	0	0.002903	0.005524	0	0	0	0	0.003831	0	0	0.002288	0	0.006427	0.000292	0.000156	0.02338	0.009615	0.057371
D(3)			0	0	0	0.001681	0	0	0	0	0.002345	0	0.008475	0.060703	0.272031	0.6	0.473684	0.347826	0.148688	0.047558	0.007009	0.000467	0	0	0
S(235)			0	0	0	0.001681	0	0	0	0	0	0	0.016949	0.060703	0.272031	0.6	0.469925	0.311213	0.148688	0.047558	0.007009	0.000467	0	0	0.000159
T(205)			0	0	0.00447	0.003361	0.067164	0	0	0.000884	0.003517	0.011194	0.025424	0.060703	0.153257	0.130769	0.387218	0.297483	0.329446	0.073265	0.002629	0.000312	0	0.003892	0.000319
P(13)			0.044444	0	0.162718	0.2	0.044776	0.008651	0.000323	0.000221	0.001172	0.014925	0.008475	0.003195	0.019157	0	0.018797	0.016018	0.002915	0.001285	0	0.000156	0.000172	0.000458	0.000319
S(197)			0.044444	0	0.135449	0.17479	0.007463	0	0.000484	0	0	0	0	0	0.015326	0	0	0	0.002915	0	0	0.000312	0	0.000229	0
T(362)			0	0	0.000894	0	0	0	0.000323	0	0	0.003731	0.008475	0	0.011494	0	0	0.01373	0.017493	0.007712	0	0.000779	0.007736	0.014652	0.032829
G(18)			0	0	0	0	0	0	0.000323	0.000221	0.004689	0	0	0.003195	0.019157	0.007692	0.12782	0.194508	0.297376	0.057841	0.002629	0.000312	0.000172	0.000229	0.000319
L(230)			0	0	0	0	0	0.088235	0.028705	0.003535	0	0	0	0	0	0	0	0.002288	0	0	0	0.000312	0.000172	0	0.000159
L(161)			0	0	0.000894	0	0	0	0.000323	0	0	0	0	0	0	0	0	0	0	0	0.015771	0.014488	0.002922	0.0087	0.000159
S(206)			0	0	0	0	0	0	0	0	0	0.003731	0.008475	0.507987	0.111111	0	0	0	0	0.012853	0.000876	0	0.000172	0	0.000159
S(194)			0	0	0.006258	0.005042	0.067164	0.017301	0.00387	0.001989	0.009379	0.059701	0.330508	0.102236	0.076628	0.030769	0.007519	0.004577	0.005831	0	0.000292	0.000467	0	0	0.000956
P(344)			0	0.043478	0	0	0	0	0	0	0	0	0	0	0	0	0	0	0	0	0	0.00405	0.011002	0.007326	0.001275
S(412)			0	0	0	0	0	0	0	0	0	0.003731	0	0	0	0	0	0	0	0	0	0.000312	0	0.005266	0.015299
G(30)			0	0	0	0	0	0	0	0	0	0	0	0	0.003831	0	0	0.004577	0.186589	0.056555	0.000292	0.000312	0	0.000229	0.000159
P(199)			0	0	0.005811	0.001681	0	0.00346	0.000484	0.000663	0.001172	0.052239	0.101695	0.054313	0.068966	0.069231	0.018797	0.002288	0.008746	0	0	0	0	0	0
M(101)			0	0	0	0	0	0	0	0	0	0	0	0	0.003831	0	0.041353	0.093822	0.09621	0.007712	0.000876	0	0	0	0.000319
D(348)			0	0	0.001341	0	0	0	0	0.00243	0	0	0.008475	0.003195	0	0.007692	0.105263	0.02746	0.008746	0	0	0.001091	0.002407	0.000458	0.000319
A(376)			0	0	0.000447	0.001681	0	0	0	0	0.002345	0.029851	0.042373	0	0.007663	0.007692	0.003759	0	0	0	0	0	0	0	0.009562
R(385)			0	0	0	0	0	0	0	0	0.002345	0	0.025424	0	0	0	0	0.064073	0.034985	0.015424	0.000292	0.002648	0.000516	0	0.000478
P(67)			0	0	0.000447	0	0	0.00346	0.000484	0.000663	0	0.033582	0.084746	0.054313	0.065134	0.053846	0.018797	0.002288	0	0	0	0	0	0	0
T(141)			0	0	0	0	0	0	0	0.000663	0.001172	0	0	0	0	0	0	0	0	0	0	0.000467	0.00086	0.00206	0.008287
S(416)			0	0	0	0	0	0	0	0	0	0	0	0	0	0	0	0	0	0	0	0	0	0.000229	0.010199
G(34)			0	0	0	0	0	0	0	0.001547	0.004689	0.119403	0.025424	0	0	0	0	0	0	0	0	0.000156	0.000688	0.001145	0.001116
M(234)			0	0	0	0	0.007463	0.012111	0.000323	0.000221	0.004689	0.05597	0.059322	0.009585	0.030651	0.046154	0.011278	0.004577	0.005831	0	0	0	0	0	0.000159
Q(9)			0	0	0	0	0	0	0	0.000221	0	0.007463	0	0.003195	0.003831	0	0	0.004577	0.005831	0.001285	0.001752	0.000623	0.000516	0.000687	0.00494
A(182)			0	0	0.000894	0	0	0	0.000323	0.007733	0	0	0	0.003195	0	0	0.003759	0.002288	0	0	0	0	0.00086	0.000229	0.000159
A(134)			0	0	0.000447	0	0	0.00173	0	0	0	0	0	0	0	0	0.026316	0.006865	0.008746	0	0	0	0	0.007555	0.000159
D(144)			0	0	0.001341	0	0.022388	0.00692	0.000806	0.000442	0	0.007463	0	0	0.003831	0	0.011278	0.006865	0.002915	0	0	0	0.000516	0.001832	0.001275
T(366)			0	0	0.000447	0.001681	0	0	0.000161	0.003314	0.003517	0.014925	0	0	0	0	0	0.002288	0	0	0	0.000312	0.002579	0.000458	0
P(326)			0	0	0	0.001681	0.067164	0	0	0	0	0	0	0	0.003831	0	0.007519	0	0	0	0	0.000467	0	0.000458	0.004303
R(14)			0	0	0	0	0	0	0.000968	0.002651	0.001172	0	0	0.003195	0	0	0	0.002288	0.002915	0.001285	0	0.000156	0	0.000458	0.002869
A(220)			0.022222	0	0.000894	0	0	0	0.000161	0.000663	0.002345	0.022388	0.067797	0.038339	0.022989	0	0	0	0	0.001285	0	0	0	0	0.000159
S(202)			0.044444	0.173913	0.004023	0	0.022388	0.00519	0.000323	0.000663	0.001172	0	0.025424	0.01278	0.003831	0	0.022556	0	0	0	0	0	0	0	0.000159
A(251)			0	0	0	0	0	0	0	0	0	0	0	0	0	0	0	0	0	0.002571	0	0	0.000344	0.001145	0.005259
H(145)			0	0	0.000447	0	0	0	0	0.000663	0.001172	0	0.008475	0.003195	0	0	0	0	0	0.001285	0.004965	0.000935	0	0.001145	0.000797
Q(409)			0	0	0	0	0	0	0	0.000884	0	0	0	0	0.007663	0	0	0	0	0	0.000292	0.004674	0.000344	0	0.000159
L(139)			0	0	0.00447	0.003361	0	0	0.000323	0	0	0	0	0	0.003831	0	0	0	0	0.001285	0	0.002804	0.000172	0.000229	0.000478
Q(244)			0	0	0	0	0	0	0	0	0	0	0	0	0	0	0	0	0	0	0.000292	0.003583	0.002235	0	0
I(337)			0	0	0	0	0	0	0	0.000221	0	0	0	0	0	0	0	0	0	0	0	0	0	0	0.005578
G(212)			0	0	0	0.001681	0	0	0.000323	0	0	0.011194	0.008475	0.009585	0.011494	0.015385	0.015038	0.009153	0.005831	0.005141	0.000584	0.000312	0	0.000687	0
A(381)			0	0	0.003576	0.015126	0	0	0	0	0	0	0.008475	0	0	0	0	0	0	0	0.001752	0.001402	0.000172	0	0.000319
S(327)			0	0	0	0	0.007463	0.00346	0.000161	0	0	0	0	0.003195	0	0	0	0	0	0.001285	0.002629	0.000779	0.000516	0.001374	0.001116
V(270)			0	0	0.000894	0	0	0.00173	0	0.001326	0	0.003731	0	0	0	0	0	0	0	0	0.00146	0.000467	0	0.002289	0.000637
P(365)			0	0	0	0	0	0	0.000645	0	0	0.003731	0.016949	0.009585	0.007663	0	0.011278	0.002288	0.002915	0	0	0	0.001375	0.000458	0.000637
Q(418)			0	0	0	0	0	0	0	0	0	0	0	0	0.011494	0.007692	0	0.002288	0.002915	0	0	0.000467	0.00086	0.00206	0.001116
D(22)			0	0	0.010729	0	0	0	0	0	0	0	0	0	0	0	0.018797	0	0	0	0	0	0.000172	0	0
N(48)			0	0	0	0	0	0	0.000161	0.003093	0.014068	0	0	0	0	0	0	0	0	0	0	0	0	0	0
T(135)			0	0	0	0	0	0	0.000645	0	0	0.003731	0	0.003195	0.011494	0	0.007519	0.002288	0	0	0	0.000312	0.00086	0.000687	0.000637
K(373)			0	0	0	0	0	0.00173	0	0	0	0	0	0	0.003831	0	0	0	0.002915	0	0	0.001091	0.001375	0.001145	0.000319
A(119)			0	0	0	0	0	0.00692	0.000645	0.000442	0.004689	0	0	0.003195	0	0.015385	0.003759	0	0.002915	0.001285	0.000292	0.000467	0	0	0.000159
A(267)			0	0	0	0	0	0	0	0.000221	0	0	0	0	0	0	0	0	0	0	0	0.002648	0.000516	0.000229	0
S(193)			0	0	0.000894	0	0	0.00173	0.000484	0.000663	0	0.022388	0	0	0	0	0.018797	0	0	0	0	0	0	0	0.000319
P(383)			0	0	0.000447	0.006723	0	0	0.000161	0.000663	0.001172	0	0.025424	0	0.011494	0	0	0	0	0	0	0.000156	0.000172	0.000687	0.000159
A(156)			0	0	0	0	0	0	0	0	0	0	0	0	0	0	0	0	0	0	0	0	0.000172	0.00435	0.000319
S(190)			0	0	0.008494	0	0	0	0	0	0	0	0.008475	0.003195	0	0	0	0	0	0	0	0	0	0	0
K(370)			0	0	0	0	0	0	0	0	0	0	0	0	0	0	0	0	0	0	0.000292	0	0	0.000916	0.00255
S(232)			0	0	0	0	0	0.00173	0	0	0	0	0	0	0	0	0	0	0.002915	0	0.000292	0	0	0.000458	0.00239
A(90)			0	0	0.000447	0	0	0.00173	0	0	0	0	0	0.003195	0	0	0	0	0	0	0	0	0.001547	0.000458	0.000956
A(398)			0	0	0	0	0	0	0.000323	0	0.001172	0.003731	0	0.003195	0	0	0	0	0	0	0.00146	0	0.000172	0.001832	0
R(209)			0	0	0	0.001681	0	0.00692	0.000161	0.000442	0	0.007463	0	0.01278	0.015326	0	0	0	0	0	0	0.000156	0	0	0
T(334)			0	0	0.000447	0	0	0.00692	0.000161	0.000221	0.001172	0	0.008475	0	0	0	0	0	0	0	0.000292	0.000312	0	0.000229	0.000797
P(168)			0	0	0	0.001681	0.067164	0	0.000645	0.000221	0	0	0	0	0	0	0	0	0	0	0	0.000312	0.000172	0	0
P(162)			0	0	0	0	0	0	0	0	0	0	0	0	0	0	0	0	0	0	0.000292	0.000467	0.000344	0.00206	0.000478
P(80)			0	0	0	0	0	0	0	0	0.001172	0	0.008475	0	0	0	0.015038	0.009153	0	0	0	0.000779	0.000344	0.000229	0
I(292)			0	0	0.003129	0.010084	0	0.00346	0	0	0	0	0	0	0	0	0	0	0	0	0.000292	0	0	0	0.000319
T(379)			0	0	0.000447	0	0	0	0	0	0.002345	0	0	0	0	0	0.011278	0.006865	0	0.002571	0.000292	0.000467	0.000172	0.000229	0
A(211)			0	0	0.000447	0	0	0	0.000323	0.000221	0	0	0	0	0	0.030769	0.011278	0.006865	0.005831	0	0	0	0	0	0.000159
P(364)			0	0	0.000894	0	0	0	0.000161	0	0	0	0.008475	0.003195	0	0.007692	0.015038	0.002288	0	0	0.001168	0	0	0	0.000159
D(401)			0	0	0.000894	0.005042	0	0.00173	0	0	0	0.007463	0.008475	0.003195	0	0	0	0	0	0	0	0.000156	0.000688	0	0.000159
Q(289)			0	0	0	0	0	0	0.000323	0	0	0	0	0	0	0	0	0	0	0	0.000292	0.000156	0.000688	0.000687	0.000637
R(89)			0	0	0.000894	0	0	0	0.000968	0	0	0	0	0	0	0	0	0	0	0	0	0.000312	0.000172	0.000229	0.000319
L(331)			0	0	0.000447	0	0	0	0	0.000221	0	0	0	0	0	0	0	0	0	0.002571	0	0.000935	0	0.000458	0.000319
P(142)			0	0	0	0	0	0	0.001935	0	0	0	0	0	0	0	0	0	0	0	0	0	0.000172	0.000229	0
R(195)			0	0	0	0	0	0	0	0.000442	0	0.011194	0.025424	0.003195	0	0	0.011278	0	0	0	0	0	0.000172	0	0.000159
T(391)			0	0	0	0	0	0	0	0	0.001172	0	0.016949	0.00639	0.007663	0	0.007519	0.002288	0	0.002571	0	0	0	0.000458	0
Q(7)			0	0	0.000894	0	0	0	0	0	0	0.011194	0.016949	0.003195	0	0	0	0.002288	0	0	0	0	0.000516	0.000458	0
D(402)			0	0	0.000447	0	0	0	0.000484	0.000442	0	0	0	0.003195	0	0	0	0	0.005831	0	0.000292	0.000156	0.000516	0	0
D(343)			0	0	0.000447	0	0	0	0	0	0	0	0	0	0	0	0	0	0	0	0	0	0	0	0.002072
D(103)			0	0	0.001788	0.001681	0	0	0	0.000663	0.001172	0	0	0	0	0	0	0	0	0.001285	0	0	0.000516	0	0
A(252)			0	0	0.000447	0	0	0	0.000484	0	0	0	0	0	0	0	0	0.002288	0	0	0.000292	0.000467	0.000516	0	0.000159
T(24)			0	0	0	0	0	0	0	0.000442	0	0	0	0	0	0	0	0	0	0.011568	0	0	0.000344	0	0
A(152)			0	0	0	0	0	0	0.000161	0	0	0	0	0	0	0	0	0	0	0	0.000292	0.000156	0	0.000458	0.001116
G(179)			0	0	0	0	0	0	0	0	0	0	0	0.003195	0.003831	0	0	0	0.002915	0	0	0	0	0.001374	0.000478
S(187)			0	0	0	0	0	0	0	0	0.001172	0	0.025424	0.009585	0.007663	0.015385	0.003759	0	0	0	0	0	0	0	0
A(359)			0	0	0.000447	0	0	0	0.000806	0.000221	0	0	0	0	0.003831	0	0	0.002288	0	0	0.000292	0.000312	0	0	0
A(208)			0	0	0.000894	0	0	0	0	0.001105	0	0	0	0	0	0	0	0.004577	0.002915	0.001285	0	0.000156	0	0	0
E(136)			0	0	0	0	0	0	0	0	0	0	0	0	0	0	0.003759	0	0	0	0	0	0	0.002518	0
V(246)			0	0	0	0	0	0	0	0	0	0	0	0	0	0	0	0	0	0	0	0	0	0.002518	0
T(271)			0	0	0.002235	0	0	0	0	0	0	0	0	0.003195	0	0	0	0	0	0	0	0.000312	0	0	0.000478
L(219)			0	0	0	0	0	0	0	0	0	0	0	0	0	0	0	0.004577	0	0	0	0	0.000688	0	0.000797
G(243)			0	0	0.000447	0	0	0	0	0	0	0	0.008475	0	0	0	0	0.009153	0	0	0.000292	0	0.000172	0	0.000319
T(198)			0	0	0.000447	0	0	0	0.000323	0.000221	0	0	0	0.00639	0	0	0	0	0	0	0	0	0	0.000458	0.000319
M(317)			0	0	0	0	0	0	0	0	0	0	0	0	0	0	0	0.002288	0	0	0	0.000156	0.000516	0.000687	0.000319
P(279)			0	0	0	0	0	0	0.000484	0	0	0	0	0.00639	0	0	0	0.002288	0	0.001285	0	0.000156	0.000172	0.000229	0

## Sheet: South America
	2019-11-30	2019-12-31	2020-01-31	2020-02-29	2020-03-31	2020-04-30	2020-05-31	2020-06-30	2020-07-31	2020-08-31	2020-09-30	2020-10-31	2020-11-30	2020-12-31	2021-01-31	2021-02-28	2021-03-31	2021-04-30	2021-05-31	2021-06-30	2021-07-31	2021-08-31	2021-09-30	2021-10-31	2021-11-30
R(203)			0.816667	0.444444	0.489282	0.70632	0.624309	0.754081	0.734716	0.720773	0.880155	0.860544	0.901271	0.921255	0.923251	0.978768	0.972049	0.932105	0.955468	0.957063	0.883183	0.902731	0.944119	0.983582	0.991688
G(204)			0.816667	0.444444	0.48835	0.70632	0.62523	0.751904	0.734716	0.720773	0.880155	0.85941	0.900293	0.920615	0.920993	0.977572	0.970733	0.930672	0.953074	0.946123	0.77349	0.405614	0.122627	0.042338	0.012378
P(80)			0	0	0.000932	0	0	0.001088	0	0.002899	0.001289	0.003401	0.004888	0.083867	0.176825	0.470096	0.716541	0.781035	0.839303	0.842541	0.709059	0.363031	0.104299	0.031697	0.008041
D(377)			0.016667	0	0	0.001239	0.000921	0	0.004367	0.002899	0.006443	0.002268	0.009775	0.007682	0.009782	0.008373	0.007399	0.004775	0.003926	0.015589	0.119601	0.507889	0.825373	0.943524	0.980304
D(63)			0	0	0	0	0	0.001088	0	0	0	0	0.001955	0.00064	0.004515	0.001794	0.000822	0.001241	0.002298	0.011692	0.109435	0.492301	0.818149	0.942764	0.975244
G(215)			0	0	0	0	0	0	0	0	0	0.002268	0.000978	0.00128	0.002257	0.003289	0.003453	0.004679	0.003256	0.012785	0.106391	0.481402	0.804	0.923077	0.962595
Q(9)			0	0	0	0.00062	0.002762	0.001088	0.001092	0	0	0.001134	0	0.001921	0.007901	0.006579	0.002466	0.00296	0.001245	0.001436	0.005116	0.03669	0.068239	0.135223	0.202385
T(205)			0.016667	0	0	0.001239	0.002762	0.001088	0.004367	0.002899	0.002577	0.014739	0.004888	0.017286	0.016178	0.010167	0.013976	0.048701	0.028443	0.034391	0.105938	0.094481	0.054866	0.01581	0.00768
P(13)			0	0	0.000932	0.001239	0.005525	0.006529	0.014192	0.009662	0.024485	0.035147	0.061584	0.040973	0.039503	0.033792	0.05245	0.049179	0.06809	0.078901	0.053811	0.038274	0.016239	0.006765	0.005963
G(214)			0	0	0	0	0	0	0	0	0	0	0.001955	0.003201	0.017682	0.02183	0.047682	0.046314	0.065409	0.07514	0.050055	0.03783	0.016179	0.006005	0.003614
M(234)			0.016667	0	0	0.001239	0.002762	0.002176	0.004367	0.01256	0.025773	0.097506	0.251222	0.329065	0.377728	0.264055	0.073167	0.029985	0.017813	0.01176	0.015541	0.005576	0.002806	0.00038	0.001355
A(119)			0	0	0.000932	0.001239	0.003683	0.001088	0.002183	0.008696	0.023196	0.094104	0.248289	0.316261	0.369827	0.270335	0.065275	0.014801	0.005554	0.005538	0.005116	0.008491	0.004299	0.002508	0.001897
I(292)			0.15	0.111111	0.145387	0.302354	0.304788	0.364527	0.363537	0.281159	0.30799	0.272109	0.235582	0.142766	0.08766	0.037081	0.018579	0.011746	0.00316	0.001367	0.000194	6.3e-05	0.000239	0.000304	0.000181
D(3)			0	0	0	0	0	0	0.001092	0.001932	0.002577	0	0	0.012164	0.027464	0.022727	0.055409	0.046887	0.034285	0.023588	0.011785	0.003612	0.000716	0.00114	0.000452
S(235)			0	0	0	0	0	0	0	0	0	0	0	0.010243	0.024454	0.02183	0.054423	0.045264	0.034285	0.024272	0.01185	0.003675	0.000716	0.00114	0.000271
L(230)			0	0	0	0	0	0	0	0	0	0	0	0.001921	0	0	0.000493	0.000286	0	0.000205	0.000971	0.011723	0.033194	0.032381	0.060354
T(366)			0	0	0	0.001859	0.000921	0.002176	0.004367	0.000966	0.006443	0.007937	0.01173	0.039052	0.056433	0.032895	0.022361	0.016807	0.020781	0.015862	0.015412	0.013497	0.006448	0.004257	0.003433
S(197)			0.033333	0	0.025163	0.02912	0.168508	0.088139	0.144105	0.171981	0.087629	0.096372	0.050831	0.028169	0.015049	0.005084	0.007563	0.003629	0.003926	0.001162	0.003756	0.001077	0.000358	0.000456	0.000813
P(383)			0	0	0	0.001239	0.000921	0.002176	0.002183	0.002899	0.002577	0.003401	0.00391	0.004481	0.009029	0.022129	0.015291	0.011173	0.012067	0.010734	0.010879	0.005196	0.001552	0.001064	0.000632
P(199)			0	0	0	0.00062	0.001842	0.004353	0.004367	0.001932	0	0.003401	0.00391	0.009603	0.017306	0.00299	0.003288	0.004393	0.008715	0.00923	0.00926	0.003295	0.002985	0.004257	0.008493
D(402)			0	0	0	0.00062	0.002762	0	0.002183	0.001932	0.002577	0	0.00782	0.002561	0.002634	0.009868	0.006248	0.006494	0.010056	0.014016	0.012433	0.003612	0.000955	0.000456	0.000361
S(327)			0	0	0	0.00062	0	0.001088	0.001092	0.002899	0.001289	0.002268	0.00391	0.00128	0.001129	0.000897	0.001151	0.002005	0.003543	0.00547	0.005634	0.010899	0.008657	0.009121	0.005511
T(379)			0	0	0	0.00062	0.006446	0.013058	0.014192	0.01256	0	0.002268	0.000978	0.00064	0.004138	0.005383	0.00855	0.010409	0.006895	0.009709	0.005957	0.003168	0.002209	0.000608	0.001536
S(2)			0	0	0	0	0	0.001088	0.001092	0.010628	0.021907	0.034014	0.012708	0.03009	0.041008	0.037081	0.020388	0.00974	0.003639	0.000547	0.001101	0.00019	0.000119	0	0
T(391)			0	0	0	0	0	0.001088	0.002183	0.000966	0.005155	0	0.000978	0.007682	0.004515	0.002691	0.002137	0.000764	0.001341	0.003282	0.00926	0.008174	0.005791	0.001672	0.000904
G(238)			0	0	0.003728	0	0.000921	0.001088	0.002183	0.000966	0.001289	0.007937	0.006843	0.006402	0.00602	0.007476	0.008879	0.008976	0.005842	0.00588	0.003626	0.002154	0.001373	0.000988	0.000994
T(135)			0	0	0	0.00062	0.000921	0.001088	0.00655	0.001932	0.003866	0.004535	0.000978	0.003201	0.001505	0.006878	0.003946	0.00382	0.004597	0.004854	0.004209	0.003549	0.002985	0.001824	0.002891
H(300)			0	0	0	0	0.000921	0.001088	0.003275	0.004831	0.006443	0.005669	0.010753	0.005762	0.001129	0.001794	0.002137	0.001241	0.002681	0.002666	0.003432	0.003612	0.004537	0.002584	0.000813
S(413)			0.016667	0	0	0.001239	0	0.001088	0.001092	0.000966	0	0.001134	0.00391	0.00064	0.001129	0	0.001644	0.001719	0.003352	0.00335	0.004792	0.003295	0.004716	0.000912	0.001175
K(373)			0	0	0	0.00062	0.000921	0	0.001092	0.000966	0.001289	0	0	0.00128	0.001129	0.000299	0.001151	0.000477	0.000766	0.000684	0.000712	0.000507	0.001851	0.008133	0.01283
R(195)			0	0	0	0	0	0	0	0.000966	0	0.001134	0.001955	0.00064	0.001505	0.000598	0.001151	0.000859	0.001437	0.000889	0.001554	0.001648	0.004179	0.005625	0.00515
P(365)			0	0	0	0	0.001842	0.002176	0.00655	0.000966	0.001289	0	0.000978	0.001921	0.00602	0.001495	0.004275	0.002387	0.005171	0.002325	0.004274	0.001457	0.001254	0.000608	0.000542
A(208)			0	0	0	0.00062	0	0.001088	0.003275	0.003865	0	0	0	0.00064	0.002257	0.000299	0.000987	0.001241	0.001437	0.001367	0.002007	0.005259	0.002149	0.002964	0.003433
A(220)			0	0	0	0	0	0	0	0.000966	0	0.001134	0.001955	0.00128	0.00301	0.001794	0.009372	0.008308	0.006129	0.003555	0.000389	0.00019	6e-05	0.000152	0
P(6)			0	0	0	0.00062	0	0	0	0.001932	0.001289	0.007937	0.017595	0.009603	0.011287	0.007476	0.002137	0.002101	0.00067	0.001299	0.001425	0.002281	0.002687	0.000836	0.000632
P(151)			0	0	0	0	0	0.002176	0.001092	0	0	0.005669	0.009775	0.023047	0.026712	0.007177	0.000822	0.001337	0.001437	0.000479	0.000712	0.00057	0.001075	0.001824	0.001265
T(362)			0	0	0.000932	0.00062	0	0.002176	0.004367	0.005797	0.016753	0.013605	0.01173	0.011524	0.004138	0.004785	0.002795	0.000859	0.001437	0.00212	0.002396	0.000824	0.001194	0.00076	0.001355
Q(229)			0	0	0	0	0	0	0	0	0.001289	0	0.000978	0.00064	0.000752	0.001196	0.000658	0.000764	0.001245	0.00082	0.000907	0.001014	0.002388	0.004637	0.00777
S(193)			0	0	0.000932	0.00062	0.006446	0.005441	0.005459	0.002899	0.001289	0.00907	0.002933	0.002561	0.003762	0.004187	0.00148	0.001241	0.00182	0.002256	0.002137	0.001774	0.001612	0.001444	0.001446
P(368)			0	0	0	0	0	0.001088	0.002183	0.000966	0.005155	0.002268	0	0.00064	0.001505	0.000598	0.000987	0.000286	0.000575	0.000615	0.002331	0.002471	0.002328	0.004789	0.003072
A(267)			0	0	0	0	0	0.001088	0	0	0	0	0	0.003841	0.000376	0.004486	0.006412	0.005443	0.002394	0.00253	0.002072	0.001077	0.000358	0.000684	0.000452
A(211)			0	0	0	0.001239	0.000921	0	0	0	0.002577	0.001134	0.006843	0.001921	0.003386	0.000598	0.000329	0.001719	0.002298	0.002461	0.002525	0.002218	0.00203	0.001368	0.001446
G(18)			0	0	0	0	0	0	0.001092	0.001932	0	0.003401	0.000978	0.001921	0.001505	0.000598	0.001151	0.001337	0.000766	0.001094	0.001619	0.002978	0.002687	0.001976	0.003524
G(179)			0	0	0	0	0.001842	0	0.001092	0.001932	0.001289	0	0	0	0.000752	0.000598	0.000987	0.000382	0.000766	6.8e-05	0.000842	0.002852	0.00591	0.0019	0.000813
Q(70)			0	0	0	0	0	0	0	0	0	0	0.000978	0.00064	0.004891	0.004187	0.000493	0.000477	0.000192	6.8e-05	0.000259	0.003802	0.004896	0.001824	0.000542
M(210)			0.016667	0	0	0	0.001842	0.001088	0.001092	0	0.003866	0.003401	0.002933	0.003201	0.00301	0.003289	0.002137	0.002196	0.00182	0.002803	0.002331	0.001141	0.000239	0.00038	0.001175
R(209)			0	0	0.001864	0	0	0.002176	0.002183	0.003865	0.003866	0.001134	0.004888	0.00064	0.001505	0.002093	0.003288	0.005348	0.001245	0.001162	0.001166	0.000951	0.001313	0.000912	0.000361
P(326)			0	0	0	0	0.001842	0	0.001092	0	0	0	0.000978	0.002561	0.001505	0.002691	0.001315	0.000573	0.002107	0.001094	0.000971	0.000951	0.001493	0.003192	0.003343
N(8)			0	0	0.000932	0	0	0.001088	0.005459	0.000966	0	0.002268	0.001955	0.010243	0.002634	0.001495	0.00148	0.002196	0.000766	0.001094	0.004015	0.001014	0.000358	0.000836	0.000904
G(34)			0	0	0	0	0	0	0.003275	0.003865	0.001289	0.002268	0.000978	0.003201	0.002634	0.002093	0.001644	0.001719	0.000862	0.001641	0.000583	0.001331	0.00203	0.002736	0.000904
A(35)			0	0	0	0	0	0.002176	0.001092	0.000966	0.007732	0.003401	0.00391	0.003201	0.006396	0.00299	0.00148	0.000764	0.000862	0.001709	0.002655	0.001077	0.000836	0.000684	0.000904
G(243)			0	0	0.001864	0.00062	0.004604	0	0.001092	0	0.003866	0.001134	0	0.004481	0.000752	0.002093	0.002466	0.001814	0.001245	0.000684	0.000777	0.001648	0.001552	0.001216	0.002078
P(279)			0	0	0.001864	0.00062	0	0	0.001092	0	0	0.002268	0	0	0.000376	0.001196	0.00148	0.000668	0.000383	0.001231	0.001295	0.001267	0.001851	0.003497	0.001988
A(182)			0	0	0	0.00062	0	0.002176	0	0	0	0	0.001955	0.00128	0.000376	0.001495	0.001644	0.000859	0.001053	0.001641	0.002784	0.001331	0.000299	0.00152	0.002711
S(194)			0	0	0.000932	0.00062	0	0.004353	0.004367	0.004831	0.006443	0.013605	0.00782	0.008963	0.012415	0.000897	0.001151	0.000382	0.000958	0.000615	0.000518	0.000697	0.001552	0.00114	0.000361
P(142)			0	0	0	0.00062	0	0	0	0	0.001289	0	0.001955	0.00064	0.000752	0.000299	0.000329	0.000382	0.000479	0.000615	0.000648	0.000253	0.001313	0.00304	0.007047
V(270)			0	0	0	0	0	0	0.003275	0	0.001289	0.002268	0.00391	0	0.001505	0.003289	0.000164	0.001719	0.000479	0.001162	0.001295	0.002471	0.001552	0.001216	0.001265
A(152)			0	0	0	0	0.003683	0.001088	0	0	0.002577	0	0.000978	0.001921	0.000752	0.001196	0.000822	0.000477	0.001149	0.00212	0.001554	0.000824	0.000478	0.002584	0.002891
D(144)			0	0	0	0.001239	0	0.002176	0.002183	0.000966	0.003866	0	0.004888	0.005762	0.003762	0.001196	0.001151	9.5e-05	0.000575	0.000273	0.000907	0.002218	0.002567	0.001672	0.000542
P(67)			0	0	0	0.001239	0	0	0	0	0	0.007937	0.004888	0.005122	0.006396	0.002392	0.001973	0.001432	0.001437	0.001026	0.001166	0.000951	0.000657	0.00076	0.001626
D(288)			0	0	0	0	0	0	0	0	0	0	0	0	0	0.001794	0.003617	0.001528	0.001437	0.002735	0.003173	0.001267	0.000358	0	0
A(90)			0	0	0	0	0	0	0	0	0	0	0	0	0	0.001794	0.001809	0.002387	0.001437	0.00212	0.001684	0.001584	0.000657	0.000684	0.001084
D(401)			0	0	0	0	0	0.001088	0	0.001932	0.001289	0.002268	0.008798	0.001921	0.001129	0.002093	0	0.001337	0.001532	0.001914	0.001684	0.001584	0.000657	7.6e-05	0.000361
M(322)			0	0	0.000932	0	0	0	0.005459	0	0	0.004535	0	0.005122	0.001129	0.001196	0.000329	0.000286	0.000192	0.001709	0.002137	0.002661	0.000657	0.000456	0.000361
T(24)			0.033333	0	0	0	0.001842	0	0.001092	0.000966	0	0.001134	0.000978	0	0.000752	0.001495	0.001315	0.000477	0.001532	0.001914	0.001943	0.00076	0.000597	0.000608	0.001265
D(128)			0	0	0	0	0	0.001088	0	0	0.002577	0	0.000978	0.00064	0.001129	0.000299	0.000658	0.000286	9.6e-05	0.000479	0.000583	0.000824	0.00191	0.002128	0.003614
A(398)			0.016667	0	0.000932	0	0	0	0.001092	0	0	0.001134	0.000978	0.002561	0.002634	0.001495	0.000987	0.001241	0.001341	0.001846	0.00136	0.000951	0.000776	0.00038	0.000904
R(14)			0	0	0	0	0	0	0	0	0.001289	0	0	0	0.000376	0.001196	0.000658	0.001623	0.001915	0.001367	0.000712	0.000444	0.001672	0.001064	0.001265
T(334)			0	0	0	0	0	0.004353	0.001092	0	0	0.001134	0.00391	0.001921	0.000752	0.001794	0.001151	0.002196	0.001053	0.000684	0.000777	0.001521	0.000657	0.00038	0.001265
G(147)			0.016667	0	0	0	0	0	0	0	0	0	0	0	0.000376	0	0	0	0	0	0	0.000507	0.005612	0.002052	0.000632
A(12)			0	0	0.000932	0	0	0.001088	0.003275	0.002899	0	0.001134	0	0.004481	0.000376	0.001196	0.000658	0.00105	0.001628	0.001367	0.000648	0.000697	0.000657	0.00076	0.002078
S(201)			0.016667	0	0	0	0	0	0	0.001932	0	0	0.000978	0.00064	0.001129	0.000598	0.000164	0	0.000192	0.000479	0.000712	0.001584	0.000836	0.00266	0.00253
G(120)			0	0	0	0	0	0	0.001092	0.000966	0	0.003401	0.001955	0.00064	0	0	0.000329	9.5e-05	0.000766	0.000684	0.001619	0.001774	0.001552	0.000836	0.001175
A(156)			0	0	0	0	0	0	0	0.000966	0	0	0	0.00064	0.000376	0.000299	0.000164	0.00105	0.000575	0.000342	0.000259	0.000507	0.001672	0.002356	0.002439
P(168)			0	0	0	0	0	0.023939	0.012009	0.001932	0.006443	0	0	0	0.000752	0	0.000329	0.000859	0.000479	0.001436	0.00123	0.000253	0.000358	0.00038	0.000994
A(251)			0	0	0	0.001239	0	0	0	0	0	0.002268	0.004888	0.00128	0.000376	0.000598	0.000493	0.000477	0.000958	0.000752	0.000648	0.001014	0.001075	0.001596	0.001084
Q(418)			0	0	0	0.00062	0	0	0.001092	0	0.001289	0	0	0	0.002257	0.000598	0.000329	0.001623	0.000479	0.000547	0.001425	0.00057	0.000597	0.00076	0.001897
D(399)			0	0	0	0	0	0	0	0.000966	0	0	0.002933	0.001921	0.001129	0.000598	0.000822	0.000668	0.000287	0.001846	0.001101	0.00076	0.000716	0.00076	0.000723
Q(289)			0	0	0	0	0.000921	0	0.001092	0.001932	0	0	0.002933	0.001921	0.000376	0.002392	0.000658	0.001146	0.000958	0.001162	0.001295	0.000697	0.000239	0.000304	0.000904
A(414)			0	0	0	0	0	0.001088	0	0	0.001289	0	0.001955	0.00064	0.000376	0.000299	0.000658	0.000573	0.000383	0.000684	0.000777	0.001457	0.000836	0.00038	0.002259
V(72)			0	0	0.000932	0.001239	0.000921	0	0	0	0.007732	0.004535	0.018573	0.011524	0.001129	0	0.000822	0.000573	0.000479	0.000752	0.000583	0.000507	0.000299	7.6e-05	0.000361
P(364)			0	0	0.000932	0	0.000921	0.001088	0	0	0	0	0	0	0.001881	0.002392	0.000822	0.001432	0.000479	0.001367	0.001036	0.001077	0.000657	0.000228	0
A(381)			0	0	0	0	0	0	0.001092	0.000966	0	0.002268	0.000978	0	0	0.000299	0.000987	0.00105	0.001245	0.001778	0.00123	0.001014	0.000179	0	0.000271
S(202)			0	0	0	0.00062	0.003683	0.001088	0.001092	0.003865	0.001289	0.003401	0.004888	0.002561	0.001505	0.001794	0.000658	0.001623	0.001245	0.000479	0.000777	0.000634	0.000119	0.000152	0.000181
S(37)			0	0	0.001864	0.00062	0.000921	0.004353	0.001092	0.008696	0.001289	0	0.000978	0.00128	0.001129	0.000598	0.000822	0.001337	0.000383	0.000615	0.000518	0.00019	0.000358	0.000836	0.001355
P(207)			0	0	0	0	0	0	0.001092	0.002899	0.010309	0.00907	0.020528	0.008963	0.001881	0.000897	0.000658	0.000191	0.000383	0.000342	0.000518	0.00038	0.000119	0.000228	0.000271
A(252)			0	0	0	0.00062	0	0	0	0	0.001289	0.002268	0	0.00064	0	0.000299	0.000329	0.002865	0.000575	0.000547	0.001101	0.00057	0.000478	0.000608	0.000361
Q(241)			0	0	0	0	0	0	0	0	0	0	0	0	0	0	0	0.000286	0.000192	0.000957	0.002202	0.002281	0.000358	0.000152	0
G(236)			0	0	0	0	0	0	0.001092	0	0.001289	0.001134	0.001955	0.00064	0.000752	0	0.000493	0.002196	0.000287	0.000957	0.001295	0.00076	0.000299	0.000228	0.000361
Q(389)			0	0	0	0.001239	0	0	0	0	0	0	0	0.00064	0.000376	0.001495	0.000822	0.000573	0.00067	0.001641	0.001554	0.000317	0.000358	0.00038	0.000181
R(40)			0	0	0	0	0.000921	0	0.002183	0	0	0.001134	0.00391	0.00064	0.001129	0.000299	0.000164	0.001814	0.000958	0.001231	0.000777	0.000253	0.000716	0.000304	0
P(344)			0	0	0	0	0	0	0	0.000966	0	0.002268	0.002933	0	0.000376	0.000299	0.000164	0.000859	0.001341	0.000957	0.001036	0.001014	0.000358	0.000456	0
E(378)			0	0	0	0.00062	0	0.001088	0	0	0	0.001134	0.002933	0.00128	0.000376	0.000299	0	0.000191	0.000862	0.001094	0.001619	0.000824	0.000299	0.000684	0
A(155)			0	0	0	0	0	0	0.001092	0.000966	0	0.002268	0	0.00128	0.000752	0	0.000658	0.000286	0.000958	0.000547	0.000648	0.000951	0.001015	0.000988	9e-05
A(359)			0	0	0	0	0.000921	0	0	0	0.001289	0	0.001955	0	0	0.000598	0.000658	0.000668	0.000766	0.000479	0.000518	0.000317	0.001134	0.001216	0.000542
A(308)			0	0	0	0	0	0	0	0	0	0	0	0.00128	0.001505	0.004486	0.001973	0.000859	0.000766	0.000273	0.00013	0.000253	0.000119	0.000456	0.001355
D(103)			0	0	0.001864	0	0.003683	0.001088	0.002183	0.003865	0	0.002268	0.002933	0.002561	0.001505	0	0.000164	0.000955	0.000383	0.00082	0.000907	0.000127	0.000119	0.000532	0.000452
G(212)			0	0	0	0	0	0	0	0	0.002577	0.001134	0.005865	0.001921	0.002634	0.002093	0.001151	0.000859	0.000862	0.001094	0.000453	0.000127	0	0.000228	0.000361
K(387)			0	0	0	0	0.002762	0.001088	0	0	0	0.001134	0	0.00064	0.001129	0.000598	0	0.002292	0.001053	0.000957	0.000518	0	0.000119	0.00038	0.000452
G(25)			0	0	0	0.002478	0	0.003264	0.002183	0.000966	0	0	0	0.005122	0.000376	0.000897	0.000164	0.000286	0.00067	0.00082	0.001036	0.00038	0.000358	0.000228	0.000361
