# Supplementary material for: Mutations in SARS-CoV-2 structural proteins: a global analysis
Source: Virol J. 2022 Dec 18;19:220. doi: 10.1186/s12985-022-01951-7 (PMC9759450; doi:10.1186/s12985-022-01951-7)
Supplement: Supplementary file 8 — Additional file 8: Evolutionary trends of the S protein mutation distribution based on the time and geographical areas [file 12985_2022_1951_MOESM8_ESM.xlsx]

## Sheet: Total
	2019-11-30	2019-12-31	2020-01-31	2020-02-29	2020-03-31	2020-04-30	2020-05-31	2020-06-30	2020-07-31	2020-08-31	2020-09-30	2020-10-31	2020-11-30	2020-12-31	2021-01-31	2021-02-28	2021-03-31	2021-04-30	2021-05-31	2021-06-30	2021-07-31	2021-08-31	2021-09-30	2021-10-31	2021-11-30
D(614)		0	0.817658	0.175528	0.739927	0.885655	0.937457	0.975519	0.990973	0.99482	0.99718	0.998933	0.99892	0.996214	0.99587	0.992319	0.993589	0.996367	0.997121	0.998355	0.997973	0.993068	0.998776	0.99564	0.992106
L(18)		0	0.079243	0.001457	0.000951	0.001316	0.001572	0.007064	0.004901	0.0191	0.094551	0.171003	0.159288	0.125916	0.084051	0.112623	0.157846	0.349712	0.574833	0.746018	0.745426	0.430204	0.275796	0.107132	0.018157
A(222)		0	0.240197	0.005827	0.000617	0.000709	0.001376	0.002062	0.005148	0.065969	0.243382	0.387102	0.35132	0.312206	0.23128	0.201867	0.088035	0.023251	0.011155	0.007985	0.010347	0.007817	0.02326	0.03706	0.022696
E(484)		0	0.002194	0	0.000411	0.000202	0.000983	0.000526	0.000529	0.000493	0.000758	0.00234	0.004751	0.009888	0.026874	0.070181	0.235902	0.54194	0.699726	0.81158	0.797589	0.497308	0.280867	0.117097	0.036905
N(501)		0	0.001371	0	5.1e-05	0.000228	0.000393	0.001053	0.000458	0.000987	0.001122	0.003482	0.004292	0.008563	0.014591	0.048295	0.139823	0.347248	0.573228	0.731373	0.760894	0.526731	0.275446	0.113049	0.033945
V(1176)		0	0.001097	0	0.002595	0.00453	0.004667	0.009038	0.008604	0.006977	0.007066	0.005672	0.008624	0.010757	0.020841	0.045253	0.116623	0.331124	0.548952	0.711471	0.711771	0.417742	0.268975	0.10682	0.018157
T(1027)		0	0	0	0.000154	0.000557	0.000246	8.8e-05	0.000212	0.000458	0.000303	0.000543	0.000405	0.00167	0.005815	0.025622	0.107779	0.338796	0.582141	0.785901	0.798069	0.437652	0.275096	0.105886	0.017565
D(138)		0	0.001371	0.007283	0.00018	0.001139	0.001769	0.00193	0.002821	0.002114	0.002487	0.004642	0.006762	0.018262	0.022245	0.040788	0.113243	0.318072	0.530711	0.688039	0.678223	0.405944	0.290661	0.135472	0.089205
P(26)		0	0.000823	0	0.000154	0.000658	0.001474	0.001711	0.004231	0.002925	0.002396	0.003519	0.005844	0.009988	0.015696	0.032783	0.111821	0.327288	0.549368	0.710709	0.710171	0.416267	0.269325	0.106509	0.017959
T(20)		0	0.001645	0	0.000411	0.000531	0.001032	0.001536	0.000882	0.003841	0.00185	0.004998	0.005588	0.010144	0.015929	0.030897	0.105983	0.325167	0.546904	0.70786	0.708198	0.414202	0.268451	0.106197	0.017367
H(655)		0	0.017823	0.001457	0.00036	0.000582	0.001032	0.000614	0.001305	0.002467	0.005246	0.007844	0.005844	0.003341	0.007291	0.027924	0.106021	0.325619	0.548288	0.71099	0.713158	0.41789	0.271249	0.10682	0.033353
R(190)		0	0	0	5.1e-05	0.000228	0.000197	8.8e-05	0.000247	0.000247	0.000303	0.001104	0.001255	0.001782	0.005565	0.025356	0.105609	0.323577	0.548288	0.713116	0.719612	0.417152	0.270374	0.106197	0.029801
K(417)		0	0	0	0	0.000152	4.9e-05	4.4e-05	0	0.000141	0	5.6e-05	0.000135	0.001102	0.004638	0.025449	0.09366	0.31093	0.530462	0.700879	0.712838	0.420028	0.273522	0.109312	0.034537
P(681)		0	0.004661	0	0.000617	0.00167	0.001179	0.002983	0.002962	0.008986	0.00934	0.01024	0.016142	0.032091	0.054596	0.093964	0.151897	0.151387	0.146649	0.179312	0.205131	0.267089	0.782267	0.870134	0.966055
S(477)		0	0.056759	0.001457	0.000154	0.001088	0.001867	0.013732	0.16344	0.109455	0.071383	0.070086	0.072275	0.071911	0.077728	0.071615	0.067716	0.096699	0.082487	0.02909	0.019468	0.00671	0.004197	0.005917	0.021906
L(452)		0	0.00329	0	0.00018	0.000304	0.000393	0.000175	0.000599	0.000176	0.000364	0.001329	0.004494	0.031379	0.075211	0.075178	0.141432	0.112074	0.059595	0.06504	0.078404	0.152865	0.694474	0.841171	0.870732
L(5)		0	0.012887	0.01311	0.005576	0.008453	0.011791	0.01167	0.010579	0.023681	0.018013	0.019356	0.019287	0.020611	0.025576	0.05025	0.12614	0.230418	0.169928	0.065682	0.028908	0.008923	0.011892	0.007786	0.008486
T(95)		0	0.001097	0.000728	0.000771	0.001417	0.002113	0.001404	0.001552	0.001762	0.001971	0.002396	0.003658	0.004944	0.010356	0.03195	0.117808	0.242269	0.188585	0.111945	0.081658	0.047932	0.087443	0.132669	0.206039
W(152)		0	0.000823	0.000728	7.7e-05	0.000582	0.00054	0.000614	0.000882	0.00074	0.000758	0.001254	0.004238	0.02825	0.071485	0.070748	0.152408	0.131458	0.068121	0.015127	0.015361	0.009439	0.034453	0.029897	0.070851
T(478)		0	0.000823	0	7.7e-05	0.001291	0.000688	8.8e-05	0.000811	0.002749	0.000334	0.000393	0.001147	0.003385	0.015276	0.040868	0.07848	0.081167	0.066792	0.068009	0.066564	0.123074	0.678384	0.835254	0.955595
D(253)		0	0.001645	0	7.7e-05	0.001392	0.020684	0.0068	0.003279	0.005885	0.000697	0.001367	0.001741	0.002617	0.005952	0.025807	0.105884	0.218551	0.160739	0.056975	0.022188	0.005014	0.004372	0	0.00375
S(13)		0	0.000548	0	2.6e-05	0.000531	0.000295	8.8e-05	0.000741	0.000211	0.000243	0.00073	0.003604	0.026479	0.065121	0.059874	0.110411	0.073698	0.029064	0.005096	0.001707	0.001696	0.009794	0.000934	0.000592
A(701)		0	0.000274	0	0.000103	0.000278	0.00113	0.002545	0.001305	0.000564	0.002244	0.002845	0.002605	0.002706	0.006065	0.023413	0.07737	0.152167	0.102001	0.038719	0.017121	0.003023	0.002798	0.003426	0.006315
T(732)		0	0.002194	0	2.6e-05	0.000253	0.002014	0.005265	0.003773	0.003665	0.003275	0.005241	0.006667	0.011503	0.021898	0.045924	0.082571	0.079779	0.05871	0.023914	0.005067	0.001327	0.001749	0.000311	0.000987
Q(677)		0	0.007678	0.000728	0.000411	0.001443	0.002555	0.004782	0.003561	0.004722	0.007551	0.007731	0.015953	0.033951	0.044861	0.054056	0.047273	0.020943	0.012401	0.008907	0.009974	0.005604	0.005946	0.002803	0.007302
Q(675)		0	0.002194	0.000728	0.001876	0.001012	0.00511	0.004914	0.003703	0.002784	0.003669	0.005841	0.017154	0.02482	0.02877	0.033662	0.037868	0.030362	0.016691	0.015287	0.022028	0.016739	0.00822	0.012146	0.008881
D(950)		0	0	0.000728	0.000128	0.000127	0.000393	0.000132	0.001164	0.000317	0.000243	9.4e-05	6.7e-05	0.000267	0.000936	0.000602	0.002557	0.005848	0.010159	0.046985	0.061817	0.179854	0.687303	0.841794	0.925794
S(98)		0	0.019194	0.003642	0.00036	0.000936	0.00167	0.001316	0.002504	0.009339	0.015617	0.018982	0.02254	0.030555	0.031964	0.037872	0.015816	0.003587	0.002048	0.002167	0.0024	0.000664	0.002274	0.000934	0.012039
T(19)		0	0.000274	0	0.000154	0.000127	0.000983	0.000263	0.001199	0.000141	0.000667	0.001647	0.000891	0.000824	0.002307	0.001296	0.003879	0.005255	0.009024	0.047787	0.06811	0.184868	0.418328	0.500779	0.577857
G(769)		0	0.00329	0.001457	0.000437	0.000987	0.001523	0.002764	0.002363	0.002819	0.006944	0.00277	0.003793	0.005456	0.011631	0.015304	0.043406	0.05617	0.035403	0.005176	0.001707	0.002065	0.002099	0	0.000987
A(262)		0	0.040033	0.000728	0.000488	0.00081	0.000491	0.001053	0.001023	0.005568	0.015101	0.023343	0.023646	0.019342	0.022342	0.024766	0.014307	0.007594	0.005591	0.001725	0.001547	0.000959	0.001924	0.002803	0.001974
M(153)		0	0.010145	0.002185	0.000565	0.00081	0.001376	0.008731	0.028421	0.038165	0.016436	0.010071	0.011783	0.013618	0.01647	0.015686	0.014057	0.009091	0.007446	0.008386	0.018081	0.008259	0.025359	0.030209	0.072232
Q(957)		0	0.000274	0	7.7e-05	2.5e-05	0.000147	8.8e-05	7.1e-05	0.000423	0.002578	0.005841	0.00081	0.000122	0.001355	0.006397	0.029935	0.068255	0.06109	0.018938	0.004427	0.000737	0.0007	0	0.000197
P(272)		0	0.025226	0	7.7e-05	5.1e-05	0.000442	0.000132	3.5e-05	0.003912	0.011887	0.018252	0.018302	0.014409	0.01776	0.01926	0.009941	0.002433	0.000443	0.000441	0.000747	0.000811	0.002099	0.001246	0.001974
N(439)		0	0.001645	0	0.00036	0.001088	0.000639	0.000175	0.002045	0.006026	0.006459	0.006103	0.005547	0.008953	0.014913	0.016403	0.015803	0.01023	0.020705	0.013201	0.005067	0.002802	0.003673	0.000623	0.002171
G(142)		0	0.000274	0	0.000514	0.000557	0.00054	0.00079	0.000529	0.000282	0.000243	0.000431	0.000459	0.001236	0.002976	0.00568	0.015978	0.025418	0.016691	0.018537	0.027521	0.029644	0.077475	0.112737	0.315177
D(936)		0	0.005758	0	0.009225	0.021108	0.014297	0.004826	0.002539	0.00437	0.00188	0.001984	0.002659	0.004387	0.006098	0.005992	0.006174	0.009762	0.02577	0.046985	0.056483	0.013126	0.004722	0.002491	0.002368
A(688)		0	0.000823	0.000728	0.000283	0.000607	0.001179	0.003334	0.004866	0.003383	0.00658	0.005429	0.005493	0.003608	0.00446	0.005009	0.006873	0.027804	0.037562	0.04221	0.038295	0.014969	0.006821	0.000934	0.003355
N(440)		0	0	0	2.6e-05	5.1e-05	9.8e-05	8.8e-05	0.000212	0.000493	0.001152	0.001067	0.001066	0.002082	0.004162	0.005576	0.009018	0.014565	0.031666	0.068651	0.079898	0.020721	0.00787	0.000311	0.016578
S(939)		0	0.000548	0.001457	0.00054	0.001417	0.003439	0.001404	0.001446	0.00148	0.002001	0.002134	0.002753	0.006948	0.005848	0.005009	0.006286	0.010698	0.023999	0.046343	0.056696	0.012315	0.004722	0.001246	0.00296
T(716)		0	0.000274	0	0.000334	0.000557	0.000197	0.000526	0.000458	0.000282	0.000364	0.000524	0.000823	0.00235	0.004823	0.012389	0.022489	0.017387	0.014366	0.013522	0.005974	0.002581	0.0007	0.000934	0.001974
S(494)		0	0.000548	0	0.000154	0.000354	0.000393	0.000439	0.000247	0.001374	0.000606	0.000674	0.001552	0.002606	0.006654	0.011683	0.0232	0.018697	0.007225	0.007744	0.00096	0.000737	0.001924	0.000623	0.001974
I(210)		0	0	0	2.6e-05	0.000101	4.9e-05	8.8e-05	0.000212	0.000211	0.000152	5.6e-05	0.000202	0.000367	0.001	0.001874	0.006099	0.010994	0.024054	0.049392	0.063737	0.014232	0.006296	0.001869	0.014407
E(780)		0	0	0	0.000128	0.000127	0.000344	0.000614	0.000635	0.000881	0.012312	0.002714	0.006384	0.009843	0.007267	0.010503	0.009243	0.00499	0.003709	0.001244	0.00096	0.001991	0.003323	0.000934	0.001381
E(154)		0	0.000274	0	0.000154	0.000177	0.000197	0.000175	0.000458	0.000564	0.000243	0.000262	0.000216	0.00049	0.001492	0.003586	0.014793	0.023407	0.01337	0.008827	0.012427	0.005457	0.024134	0.02834	0.06118
D(80)		0	0.013984	0	0.000308	0.000886	0.00059	0.001404	0.002045	0.015611	0.010401	0.008574	0.008489	0.006091	0.005267	0.00642	0.004428	0.003493	0.003792	0.002488	0.002773	0.00059	0.002274	0.002803	0.012433
R(158)		0	0	0	7.7e-05	0.000202	4.9e-05	4.4e-05	0.000282	0.000211	3e-05	9.4e-05	4e-05	0.00029	0.000742	0.001423	0.004465	0.008312	0.018573	0.037114	0.046242	0.01814	0.054215	0.044846	0.078547
Q(1071)		0	0.002194	0	0.000128	0.000101	4.9e-05	0.000175	0	0.000176	0.000121	0.000225	0.000904	0.002182	0.00517	0.007542	0.013621	0.021738	0.009522	0.003411	0.000267	0.000295	0.00035	0	0.000197
D(215)		0	0.008226	0.000728	0.000283	0.000456	0.003292	0.001887	0.00141	0.001973	0.005367	0.006664	0.007531	0.005556	0.004767	0.004916	0.005987	0.004756	0.006311	0.007102	0.013494	0.00295	0.003847	0.00436	0.00671
N(679)		0	0.000548	0	7.7e-05	0.000304	0.000344	0.000175	0.000317	0.000388	0.000758	0.000636	0.001323	0.005234	0.004896	0.007022	0.006523	0.003088	0.003183	0.008787	0.020214	0.043138	0.050192	0.024603	0.022104
A(1078)		0	0.00329	0	0.000899	0.00086	0.001474	0.002632	0.004055	0.002573	0.002092	0.002939	0.003739	0.006347	0.009074	0.010746	0.00565	0.002947	0.002713	0.002327	0.00176	0.000885	0.001399	0.002491	0.005723
H(49)		0	0.006307	0.010925	0.000848	0.001139	0.001965	0.004212	0.012201	0.002396	0.003275	0.002602	0.003091	0.004153	0.004162	0.004245	0.003704	0.004538	0.002768	0.008466	0.047523	0.000737	0.001924	0.001246	0.001776
L(54)		0	0.001097	0	0.000976	0.003214	0.0028	0.010837	0.002856	0.002044	0.002123	0.003051	0.005534	0.006781	0.008937	0.006443	0.003941	0.001778	0.002131	0.001043	0.000267	0.000664	0.001049	0.000934	0.001381
E(583)		0	0.025226	0	0.000334	0.000582	0.005994	0.002852	0.002574	0.001727	0.004973	0.012411	0.01324	0.006926	0.003202	0.003089	0.00242	0.001715	0.00191	0.001886	0.001867	0.002433	0.003498	0.000623	0.002171
F(157)		0	0	0.000728	0.000103	0.000152	0.000147	0.000307	0.000212	0.001656	0.001547	0.000992	0.001984	0.003552	0.004234	0.005055	0.006461	0.005848	0.006339	0.008346	0.015467	0.008185	0.032529	0.030209	0.072824
G(75)		0	0	0	0.000411	0.000785	0.00167	0.000834	0.002292	0.00141	0.001607	0.001273	0.007896	0.005779	0.007299	0.004997	0.004104	0.004507	0.005896	0.007824	0.003574	0.002212	0.001574	0.002491	0.011644
A(845)		0	0.002194	0	0.001285	0.001873	0.001818	0.001009	0.001234	0.001762	0.001092	0.002228	0.002632	0.002839	0.003525	0.006223	0.008245	0.008639	0.007917	0.008707	0.008054	0.005014	0.005421	0.001557	0.002171
S(12)		0	0.001645	0	0.000617	0.000354	0.000688	0.00136	0.017843	0.006625	0.002608	0.001572	0.002213	0.004187	0.00471	0.004245	0.004627	0.006316	0.006782	0.004293	0.003307	0.002065	0.0007	0.000623	0.001184
G(1219)		0	0.001371	0	0.002904	0.003644	0.005601	0.002325	0.001093	0.001727	0.001092	0.001048	0.003415	0.005178	0.004501	0.005506	0.005476	0.008031	0.004955	0.00313	0.002773	0.001032	0.001749	0.002803	0.004737
D(1163)		0	0.009049	0	0.000514	0.000633	0.000442	0.000658	0.001693	0.004229	0.015951	0.010314	0.005952	0.004532	0.004041	0.00642	0.002607	0.00131	0.00083	0.000762	0.000533	0.000295	0.000525	0	0.000197
A(520)		0	0.001097	0	0.000283	0.000228	0.001474	0.005528	0.002891	0.004405	0.004306	0.001348	0.002969	0.003842	0.006251	0.007288	0.006898	0.002058	0.001605	0.00325	0.003467	0.001401	0.000525	0.000934	0.002566
Q(173)		0	0	0	7.7e-05	0.000304	0.000147	0.000307	0.000282	0.000317	0.000879	0.003856	0.008908	0.003363	0.003017	0.003251	0.005738	0.004475	0.005259	0.007423	0.010987	0.002433	0.004372	0.00436	0.013618
P(812)		0	0	0.000728	0.000385	0.00081	0.000983	0.001667	0.001657	0.000916	0.002881	0.003463	0.002402	0.005935	0.005775	0.006119	0.003842	0.00446	0.004152	0.005216	0.00128	0.000516	0.001049	0.002803	0.004539
G(1167)		0	0.009597	0	0.00018	0.000101	0.000344	0.000307	0.000353	0.00222	0.015435	0.01052	0.005628	0.003374	0.002073	0.003991	0.003754	0.0034	0.001882	0.001806	0.001867	0.000811	0.001224	0.000623	0.002171
V(1228)		0	0.001919	0.002185	0.000103	0.000354	0.002063	0.001843	0.001093	0.001832	0.001456	0.001703	0.002321	0.00432	0.005969	0.006316	0.006274	0.003056	0.00263	0.003491	0.00256	0.001401	0.001399	0.001557	0.001776
K(1073)		0	0.016452	0	0.000308	0.001291	0.001179	0.000439	0.000176	0.002396	0.005003	0.005616	0.004845	0.005055	0.005614	0.00406	0.003767	0.00198	0.001107	0.001605	0.00064	0.000295	0.001574	0.003114	0.001381
S(1252)		0	0.000548	0.000728	0.000103	0.000177	0.00054	0.001053	0.000247	0.000529	0.000576	0.002827	0.002308	0.003318	0.003565	0.003077	0.003779	0.010526	0.00955	0.008265	0.003467	0.003761	0.00035	0.000934	0.000789
S(735)		0	0	0	2.6e-05	2.5e-05	4.9e-05	4.4e-05	0.000176	0	9.1e-05	3.7e-05	6.7e-05	0.000134	0.00021	0.000578	0.001996	0.00708	0.015335	0.031898	0.034242	0.013347	0.006471	0.006851	0.004144
W(258)		0	0	0	0.000334	0.00081	0.000983	0.000834	0.00067	0.001128	0.000697	0.000449	0.000567	0.001837	0.005267	0.00598	0.008656	0.005957	0.003626	0.001404	0.002027	0.001991	0.005072	0.003737	0.005329
H(146)		0	0.001097	0	0.000257	0.001291	0.001425	0.001448	0.001199	0.001445	0.002608	0.003632	0.002105	0.001325	0.001557	0.002105	0.003667	0.003431	0.005065	0.00642	0.012961	0.005752	0.024309	0.02834	0.071048
Y(144)		0	0	0	7.7e-05	0.000152	0.00059	4.4e-05	0.000247	0.000141	3e-05	0.000225	0.000135	0.000445	0.000984	0.001689	0.006124	0.004741	0.006726	0.011435	0.021334	0.010102	0.028506	0.030832	0.070653
Q(613)		0	0.001645	0	0.000231	0.000456	0.000786	0.000877	0.000776	0.001374	0.001304	0.002377	0.003145	0.00402	0.00488	0.00413	0.003567	0.002682	0.001965	0.004654	0.006134	0.004867	0.00717	0.005294	0.010657
L(176)		0	0.001919	0.000728	0.000411	0.000506	0.000344	0.000921	0.00067	0.001973	0.002244	0.006496	0.006748	0.004087	0.003283	0.002799	0.002295	0.001949	0.001827	0.002608	0.004	0.002065	0.004722	0.001246	0.012631
P(1162)		0	0.001097	0.001457	0.000771	0.000835	0.001572	0.001316	0.00134	0.00141	0.001789	0.00219	0.004535	0.003318	0.004718	0.004882	0.003542	0.002277	0.002214	0.002367	0.001547	0.001696	0.003148	0.001557	0.001776
A(570)		0	0.001645	0	0.000103	0.000405	0.000295	0.000175	0.000599	0.000141	0.000667	0.000393	0.000486	0.001191	0.001726	0.003227	0.008419	0.007267	0.010186	0.006661	0.005067	0.002138	0.002274	0.000311	0.001579
D(178)		0	0	0	2.6e-05	0.000152	0.000197	0.000351	0.000811	0.001163	0.001031	0.002321	0.002389	0.002093	0.002516	0.003632	0.004877	0.003992	0.004429	0.005898	0.011041	0.002212	0.003498	0.001246	0.013815
A(522)		0	0.000548	0.000728	0.000745	0.000607	0.001572	0.002062	0.000564	0.002326	0.00376	0.001104	0.001269	0.001882	0.002984	0.006027	0.006798	0.003056	0.001439	0.000722	0.001013	0.002433	0.001924	0.001557	0.002171
R(21)		0	0.002194	0	0.001413	0.00453	0.006977	0.014478	0.006735	0.004088	0.003881	0.00468	0.002699	0.001203	0.001032	0.000891	0.000948	0.001325	0.006145	0.002247	0.002827	0.000664	0.002623	0.002491	0.000789
A(1020)		0	0.001097	0	0.000514	0.001164	0.000835	0.000746	0.002151	0.00363	0.00282	0.002546	0.003145	0.004721	0.003638	0.002464	0.00212	0.003197	0.002657	0.002367	0.0016	0.00059	0.001224	0.000311	0.001776
Y(145)		0	0	0	0.000745	0.000228	9.8e-05	8.8e-05	0.000176	0.000106	0.000121	5.6e-05	1.3e-05	0.000546	0.000831	0.001319	0.003455	0.003493	0.005757	0.009469	0.019948	0.009513	0.027457	0.030832	0.072627
D(1118)		0	0.000823	0	0.000103	0.000101	0.000197	0.000746	0.000458	0.001445	0.000819	0.000562	0.000621	0.000846	0.000952	0.00273	0.008432	0.006893	0.010463	0.005898	0.004534	0.001401	0.001049	0.001246	0.000395
V(143)		0	0	0	2.6e-05	0.000278	0.000197	0.000483	0.000705	0.000282	0.000182	0.0003	0.000364	0.001214	0.001549	0.001886	0.003966	0.003337	0.00429	0.0065	0.012481	0.003908	0.024134	0.02834	0.070851
N(164)		0	0.011242	0	0	0.000177	4.9e-05	4.4e-05	0.000141	0.000176	0.000394	0.00337	0.003671	0.002427	0.001242	0.001515	0.003879	0.004023	0.00537	0.007222	0.011041	0.002286	0.002973	0	0.012631
A(27)		0	0.001097	0	0.001285	0.000987	0.000933	0.000965	0.001622	0.001057	0.002001	0.002452	0.00166	0.002806	0.002678	0.00273	0.004665	0.003462	0.002823	0.002648	0.00512	0.002507	0.001224	0.003426	0.002171
E(180)		0	0.000274	0	2.6e-05	0.000152	0.000147	0.000877	0.000564	0.000247	0.000334	0.00015	0.000486	0.001258	0.002395	0.004743	0.00555	0.003774	0.004346	0.005818	0.010881	0.002507	0.002798	0.000934	0.015591
N(148)		0	0.000548	0.000728	0.000128	0.000152	0.000197	8.8e-05	0.000247	0.000282	3e-05	1.9e-05	0.000297	0.000924	0.000944	0.001654	0.004428	0.003665	0.004706	0.006139	0.012321	0.005309	0.024134	0.029274	0.071048
M(177)		0	0	0	0.000385	0.000531	0.000835	0.000395	0.000353	0.000388	0.000273	0.000393	0.001228	0.001726	0.001984	0.003146	0.004578	0.003758	0.004789	0.00642	0.011894	0.002433	0.003498	0.001869	0.01421
S(151)		0	0.000548	0	0.000128	0.000253	0.000295	0.000921	0.000635	0.000458	0.000455	0.000225	0.000297	0.000679	0.000919	0.001573	0.003854	0.003415	0.004401	0.00634	0.012641	0.005088	0.023959	0.02834	0.070653
T(859)		0	0.001371	0	0.000308	0.001949	0.000344	0.000877	0.000846	0.001269	0.001728	0.001067	0.002308	0.003006	0.003452	0.002811	0.003231	0.002729	0.002906	0.002247	0.0024	0.001401	0.002099	0.004983	0.00296
L(141)		0	0.000548	0	0	0.000152	4.9e-05	0.000219	0.000247	0.000211	9.1e-05	0.000112	0.001147	0.000958	0.000968	0.001388	0.00338	0.003056	0.00429	0.006299	0.012481	0.003835	0.024309	0.02834	0.070456
S(640)		0	0.000274	0	7.7e-05	0.00043	0.000933	0.002501	0.003174	0.002291	0.000879	0.00088	0.001417	0.002439	0.003178	0.003054	0.002956	0.002713	0.001744	0.004253	0.004534	0.002876	0.011193	0.001557	0.002368
G(181)		0	0.001097	0.001457	0.000437	0.000582	9.8e-05	0.000921	0.000741	0.00148	0.004003	0.005017	0.003617	0.003073	0.002226	0.002094	0.001335	0.001201	0.001661	0.002247	0.003627	0.003023	0.00717	0.002803	0.017959
R(357)		0	0	0.000728	0.000128	0.000127	0.000491	0.001009	0.000388	0.002537	0.000697	0.003295	0.002834	0.005111	0.006146	0.002614	0.000486	7.8e-05	2.8e-05	0.00012	0.000107	0.000442	0.001749	0	0.001776
S(155)		0	0	0	5.1e-05	0.000127	9.8e-05	0.000263	0.000212	0.000106	0.000121	3.7e-05	0.000351	0.000612	0.001161	0.001504	0.003517	0.003181	0.004263	0.005898	0.012107	0.004646	0.023785	0.029897	0.070456
V(213)		0	0.000274	0	0.00018	0.000557	0.001523	0.002939	0.00141	0.001092	0.000425	0.000225	0.000391	0.001024	0.001895	0.002406	0.004453	0.003555	0.004872	0.006179	0.011361	0.002286	0.003323	0.000934	0.015196
T(572)		0	0.000823	0	0.000617	0.000658	0.002358	0.001316	0.000987	0.00148	0.00094	0.000992	0.001458	0.00255	0.003742	0.002915	0.002482	0.00184	0.002685	0.002167	0.002667	0.00354	0.014516	0.008097	0.004144
M(1229)		0	0.000548	0.000728	0.000385	0.000405	0.000983	0.000965	0.002292	0.001973	0.001698	0.002583	0.003118	0.00137	0.002081	0.003054	0.003829	0.003587	0.002464	0.001525	0.00304	0.000885	0.000525	0.001246	0.000987
S(255)		0	0.001371	0	0.000334	0.001493	0.000344	0.00057	0.000247	0.001868	0.003791	0.004586	0.003212	0.002817	0.001912	0.001909	0.002856	0.002807	0.001218	0.001926	0.001653	0.001254	0.002973	0.001869	0.003355
D(796)		0	0.000274	0	5.1e-05	0.00043	0.000491	0.002457	0.000882	0.000916	0.000758	0.000505	0.00189	0.002617	0.003105	0.005344	0.002931	0.001497	0.002464	0.001926	0.000747	0.001254	0.000175	0.000623	0.015591
S(982)		0	0	0	0	5.1e-05	0	0	0	7e-05	0	5.6e-05	0.000135	0.000189	0.000621	0.002302	0.007546	0.006986	0.010242	0.006019	0.004694	0.000959	0.000525	0	0

## Sheet: Africa
	2019-11-30	2019-12-31	2020-01-31	2020-02-29	2020-03-31	2020-04-30	2020-05-31	2020-06-30	2020-07-31	2020-08-31	2020-09-30	2020-10-31	2020-11-30	2020-12-31	2021-01-31	2021-02-28	2021-03-31	2021-04-30	2021-05-31	2021-06-30	2021-07-31	2021-08-31	2021-09-30	2021-10-31	2021-11-30
D(614)			0.982143	0.916667	0.680851	0.891975	0.94572	0.947257	0.940329	0.873288	0.8	0.971698	0.948905	0.788732	0.889247	0.909283	0.821596	0.741573	0.796296	0.619048	0.833333	0.904762	1	0.9875
P(681)			0	0	0	0	0	0.00211	0.002058	0.006849	0	0.053459	0.145985	0.248239	0.122581	0.116034	0.253521	0.224719	0.194444	0.428571	0.333333	0.761905	0.923077	0.9625
Q(677)			0.017857	0	0	0	0.031315	0.101266	0.057613	0.061644	0.051282	0.04717	0.040146	0.084507	0.088172	0.135021	0.314554	0.191011	0.527778	0	0	0.047619	0.115385	0
L(452)			0.071429	0	0	0	0	0.00211	0.010288	0.003425	0.010256	0.012579	0.020073	0.091549	0.064516	0.090717	0.300469	0.269663	0.435185	0.047619	0.291667	0.714286	0.961538	0.9875
S(477)			0.017857	0.083333	0	0	0.002088	0	0	0	0.015385	0.009434	0.047445	0.080986	0.289247	0.139241	0.051643	0	0	0	0	0	0	0
F(157)			0	0	0	0	0	0	0	0.085616	0.148718	0.028302	0.051095	0.197183	0.058065	0.031646	0.103286	0.11236	0.046296	0.285714	0.083333	0.047619	0	0
Q(613)			0	0	0	0	0	0	0	0.085616	0.148718	0.034591	0.054745	0.18838	0.058065	0.029536	0.103286	0.11236	0.046296	0.285714	0.041667	0.047619	0.038462	0
V(367)			0	0	0	0	0	0	0	0.085616	0.148718	0.028302	0.051095	0.18838	0.056989	0.033755	0.103286	0.101124	0.046296	0.285714	0.041667	0.047619	0	0
A(222)			0	0.25	0.015957	0	0	0.006329	0.010288	0	0.020513	0.015723	0.007299	0.021127	0.077419	0.170886	0.075117	0.033708	0	0	0	0	0	0.05
N(501)			0	0	0	0	0	0.004219	0.004115	0.003425	0.005128	0.028302	0.029197	0.045775	0.04086	0.059072	0.093897	0.235955	0.138889	0.428571	0.125	0.142857	0	0
L(5)			0	0	0	0.015432	0.029228	0.052743	0.041152	0.058219	0.066667	0.009434	0.021898	0.015845	0.027957	0.040084	0.018779	0.011236	0.037037	0	0	0	0	0.025
T(478)			0	0	0	0	0	0	0	0	0	0.003145	0.001825	0	0.01828	0.016878	0.051643	0.033708	0.027778	0.047619	0.291667	0.714286	0.884615	0.975
L(18)			0	0	0	0	0	0.00211	0.002058	0.003425	0.020513	0.003145	0.007299	0.036972	0.065591	0.065401	0.046948	0.067416	0.037037	0.380952	0.125	0.142857	0	0
S(689)			0	0	0	0	0	0	0	0	0	0	0.016423	0.045775	0.035484	0.14557	0.046948	0	0	0	0	0	0	0.0125
T(19)			0	0	0	0	0	0	0	0	0	0	0.001825	0	0	0	0	0	0.009259	0.047619	0.291667	0.714286	0.846154	0.975
D(950)			0	0	0	0	0	0	0	0	0	0	0	0	0.001075	0.00211	0	0.011236	0.009259	0.095238	0.166667	0.666667	0.884615	0.975
E(484)			0	0	0	0	0	0.00211	0.002058	0	0.010256	0.009434	0.005474	0.012324	0.013978	0.027426	0.070423	0.258427	0.12963	0.52381	0.125	0.190476	0	0.05
T(95)			0	0	0	0	0	0.004219	0.004115	0.006849	0.005128	0.003145	0	0.003521	0.016129	0.046414	0.014085	0.101124	0.027778	0.047619	0.083333	0.095238	0.038462	0.5375
S(12)			0	0	0	0	0.004175	0.025316	0.014403	0.003425	0	0.003145	0	0.015845	0.006452	0	0.140845	0.067416	0.314815	0	0	0	0	0
H(655)			0	0	0	0	0	0.00211	0.002058	0.003425	0	0.006289	0.00365	0.008803	0.031183	0.035865	0.028169	0.123596	0.064815	0.380952	0.125	0.142857	0	0
D(80)			0	0	0	0	0.002088	0.00211	0	0.044521	0.025641	0.040881	0.060219	0.010563	0.010753	0.014768	0	0.022472	0	0	0.041667	0	0	0
N(440)			0	0	0	0	0	0	0	0.003425	0.020513	0	0	0.022887	0.048387	0.037975	0.032864	0.022472	0	0	0	0	0	0
Q(675)			0.017857	0	0	0	0	0.010549	0.004115	0	0.005128	0.006289	0.009124	0.010563	0.064516	0.014768	0	0.011236	0	0	0	0	0	0
R(102)			0	0	0	0	0	0	0	0	0.005128	0.006289	0.012774	0.068662	0.013978	0.012658	0.032864	0.067416	0.046296	0.095238	0	0	0	0
V(3)			0	0	0	0	0.010438	0.031646	0.037037	0.041096	0.066667	0.003145	0.00365	0.003521	0.009677	0.008439	0.004695	0	0	0	0	0	0	0
D(796)			0	0	0	0	0	0.00211	0	0.003425	0	0	0	0.010563	0.034409	0.035865	0.056338	0.033708	0.064815	0	0	0	0	0
V(382)			0.107143	0	0	0	0	0.004219	0.104938	0.013699	0.010256	0	0	0.012324	0	0.006329	0	0	0.009259	0	0	0	0	0
W(152)			0	0	0	0	0.004175	0	0	0	0	0	0	0.005282	0.008602	0.004219	0.093897	0.067416	0.268519	0	0.083333	0	0	0
G(769)			0.035714	0.083333	0.005319	0	0	0.00211	0.002058	0.006849	0	0.056604	0.009124	0.022887	0.012903	0.004219	0.037559	0.022472	0.018519	0	0	0	0	0
G(1219)			0.017857	0	0	0	0.004175	0	0.002058	0	0.005128	0	0.001825	0.022887	0.031183	0.035865	0.00939	0	0	0	0	0	0	0
V(1228)			0.035714	0	0	0	0	0.00211	0	0	0	0.009434	0.005474	0.042254	0.021505	0.006329	0	0.022472	0.009259	0	0	0	0.076923	0.0125
R(346)			0	0	0	0	0	0	0.002058	0	0	0	0	0.003521	0	0.00211	0.079812	0.044944	0.296296	0.047619	0	0	0	0.0125
Y(1155)			0.035714	0	0	0	0	0	0.002058	0.006849	0.005128	0	0.00365	0.038732	0.02043	0.006329	0	0.022472	0	0	0	0	0.076923	0
A(653)			0	0	0	0	0	0	0	0	0.005128	0	0	0.008803	0.032258	0.033755	0.00939	0.011236	0	0	0	0	0	0
A(899)			0	0	0	0	0	0	0	0	0	0.003145	0	0	0.001075	0.00211	0.075117	0.067416	0.268519	0	0	0	0	0
D(138)			0	0	0	0	0.006263	0.00211	0.002058	0	0	0	0	0.010563	0.005376	0.006329	0.028169	0.067416	0.037037	0.428571	0.166667	0.142857	0	0
V(1264)			0	0	0	0.003086	0.002088	0.006329	0	0	0	0.015723	0.012774	0.005282	0.002151	0.042194	0	0.033708	0	0.095238	0	0.047619	0	0.0375
D(215)			0	0	0	0	0	0.006329	0	0	0	0.006289	0.005474	0.012324	0.012903	0.035865	0.014085	0.011236	0.009259	0	0.041667	0	0	0
T(716)			0	0	0	0	0	0	0.002058	0	0.005128	0	0.001825	0	0.015054	0.004219	0.061033	0.101124	0.083333	0	0	0	0	0
S(254)			0	0	0	0	0	0	0	0	0	0	0.005474	0	0.049462	0.00211	0	0	0	0	0	0	0	0
A(1078)			0	0	0	0	0.006263	0.012658	0.002058	0.003425	0.005128	0.003145	0.001825	0.005282	0.011828	0.027426	0.004695	0	0	0	0	0.047619	0	0
R(408)			0	0	0	0	0.004175	0.00211	0.002058	0	0.005128	0.003145	0	0	0.035484	0.008439	0	0	0	0	0	0	0	0
D(936)			0	0	0	0.012346	0.008351	0.008439	0.010288	0.006849	0.010256	0.003145	0.001825	0.005282	0.006452	0.012658	0.00939	0.011236	0	0	0	0	0	0
A(520)			0	0	0	0	0.002088	0.00211	0.004115	0.006849	0.010256	0.003145	0	0.005282	0.004301	0.046414	0.004695	0	0	0	0	0	0	0
A(879)			0	0	0	0.080247	0.002088	0.00211	0	0	0	0	0.00365	0.005282	0.001075	0.004219	0	0.011236	0	0	0	0	0	0
T(1027)			0	0	0	0	0	0	0.002058	0	0	0	0	0	0.005376	0.012658	0.014085	0.033708	0.037037	0.380952	0.125	0.142857	0	0
V(622)			0	0	0	0.006173	0.004175	0.006329	0.006173	0	0	0	0	0.019366	0.009677	0.006329	0.004695	0	0	0	0.041667	0	0	0
S(939)			0	0	0	0	0.008351	0	0.002058	0.003425	0	0	0.001825	0.001761	0.017204	0.016878	0.00939	0.011236	0	0	0	0	0	0
P(26)			0	0	0	0	0	0.00211	0	0	0	0	0	0.010563	0.003226	0	0.014085	0.033708	0.037037	0.380952	0.125	0.190476	0	0
G(142)			0	0	0	0	0	0	0.002058	0.003425	0	0	0	0.001761	0.009677	0.00211	0.037559	0.033708	0.018519	0	0.125	0.095238	0.076923	0.0125
M(1237)			0	0	0	0.003086	0	0.00211	0	0	0	0	0.001825	0.008803	0.019355	0.004219	0	0.022472	0	0	0	0	0	0.0375
S(494)			0	0	0	0	0	0.00211	0.002058	0	0.005128	0.006289	0.025547	0.010563	0.005376	0.00211	0.004695	0	0	0	0	0	0	0
V(227)			0	0	0	0	0	0	0.002058	0	0	0.009434	0.005474	0.012324	0.007527	0.014768	0.018779	0	0	0	0	0	0	0
E(554)			0	0	0	0	0	0.00211	0	0	0.071795	0.04717	0	0.001761	0	0	0	0	0	0	0	0	0	0
M(153)			0	0	0	0	0	0	0	0	0	0.025157	0.023723	0.010563	0.001075	0.00211	0.004695	0	0	0	0.041667	0	0	0
T(22)			0.017857	0	0	0	0.002088	0	0.002058	0.003425	0	0.003145	0.016423	0.021127	0.004301	0	0	0	0	0	0	0.047619	0	0
A(845)			0	0	0	0	0	0	0.002058	0.013699	0	0.012579	0.010949	0.001761	0.008602	0.00211	0	0.011236	0	0	0.125	0.047619	0	0
V(1176)			0	0	0	0.003086	0	0	0.004115	0.003425	0	0	0	0.003521	0.001075	0.00211	0.004695	0.022472	0.037037	0.380952	0.125	0.142857	0	0
D(1118)			0	0	0	0	0.002088	0	0	0	0	0	0.001825	0.001761	0	0.00211	0.051643	0.044944	0.083333	0.047619	0	0	0	0
M(1229)			0.017857	0.083333	0	0	0.002088	0.00211	0	0	0	0.006289	0.001825	0.005282	0.006452	0.006329	0.00939	0	0	0	0.291667	0	0	0
A(570)			0	0	0	0	0	0.00211	0	0	0	0	0	0.003521	0	0	0.051643	0.044944	0.083333	0	0	0	0	0
T(323)			0	0	0	0	0	0	0	0	0	0	0	0.005282	0.007527	0.029536	0	0.022472	0	0	0	0	0	0
A(348)			0	0	0	0	0	0	0.002058	0	0	0	0	0.005282	0.013978	0.004219	0.014085	0.011236	0	0.047619	0.041667	0.047619	0	0
R(190)			0	0	0	0	0	0	0	0	0	0	0	0	0.003226	0.00211	0.00939	0.022472	0.037037	0.380952	0.125	0.142857	0	0
E(96)			0.017857	0	0	0	0	0	0	0	0	0	0	0	0.024731	0.00211	0	0	0	0	0	0	0	0
A(1020)			0.017857	0	0	0	0	0	0.030864	0	0	0	0	0.001761	0.003226	0.006329	0.004695	0	0	0	0	0	0	0
C(1235)			0	0	0	0	0.004175	0.00211	0	0	0	0.003145	0	0.001761	0.007527	0.00211	0.037559	0	0.018519	0.047619	0	0	0	0
G(261)			0	0	0	0	0	0	0.002058	0.003425	0	0	0.00365	0.010563	0.009677	0.006329	0.00939	0	0	0	0	0	0	0
T(20)			0	0	0	0	0	0	0	0	0	0.003145	0	0	0.001075	0.00211	0.004695	0.022472	0.037037	0.380952	0.125	0.142857	0	0
I(882)			0	0	0	0	0.002088	0	0	0	0.005128	0.028302	0.018248	0.001761	0.001075	0.00211	0	0	0	0	0	0	0	0
K(417)			0	0	0	0	0	0	0	0	0	0	0	0	0	0.004219	0.00939	0.011236	0.037037	0.380952	0.125	0.142857	0	0
T(385)			0.017857	0	0	0	0.002088	0.00211	0	0	0	0	0.020073	0.010563	0.002151	0.00211	0	0	0	0	0	0	0	0
I(1018)			0	0	0	0	0	0	0	0	0	0	0	0	0	0.042194	0.00939	0	0	0	0	0	0	0
S(98)			0	0.166667	0	0	0	0	0	0	0.010256	0.003145	0	0.008803	0.005376	0.00211	0.004695	0	0	0	0.083333	0	0.115385	0
K(182)			0	0	0	0	0	0	0	0	0	0	0	0.001761	0.006452	0.004219	0.046948	0.011236	0.018519	0	0	0	0	0
T(73)			0	0	0	0	0	0	0	0	0	0.018868	0.023723	0.003521	0	0	0	0	0	0	0	0	0	0
F(186)			0	0	0	0	0	0	0	0	0	0	0	0	0.006452	0.027426	0	0	0.009259	0	0	0	0	0
V(6)			0	0	0.005319	0.012346	0.025052	0	0	0	0	0	0	0.003521	0.001075	0	0	0	0	0	0	0	0	0
A(522)			0	0	0	0	0.014614	0.008439	0	0.006849	0	0	0	0.005282	0.001075	0.004219	0	0	0	0	0	0	0	0
A(688)			0	0	0	0	0.002088	0.00211	0.004115	0.006849	0.005128	0	0.001825	0.005282	0.006452	0.004219	0	0	0	0	0	0	0	0
S(1252)			0	0	0	0.003086	0	0	0.00823	0	0	0	0	0	0.011828	0.004219	0	0	0	0	0	0	0	0
T(859)			0	0	0.005319	0	0	0	0.004115	0.010274	0.010256	0.003145	0	0	0.006452	0.00211	0	0.011236	0	0	0	0	0	0.0125
A(262)			0	0	0	0	0	0.004219	0.002058	0	0	0	0.001825	0.010563	0.005376	0.00211	0	0	0	0.047619	0	0	0	0
I(805)			0	0	0	0	0	0	0	0	0	0.003145	0.001825	0.001761	0.007527	0.012658	0.004695	0	0	0	0	0	0	0
Q(836)			0	0	0	0	0	0	0.002058	0	0.005128	0.015723	0.014599	0	0.001075	0.00211	0	0	0	0	0	0	0	0
P(812)			0	0	0	0	0.004175	0.004219	0.002058	0.003425	0	0	0	0.003521	0.001075	0.012658	0.004695	0	0	0	0	0	0	0.0125
V(1104)			0	0	0	0.003086	0.002088	0	0.004115	0	0	0.003145	0	0.003521	0.004301	0.00211	0	0	0	0	0.041667	0.142857	0.038462	0
H(49)			0	0	0	0	0	0	0.002058	0	0	0	0.00365	0	0.010753	0.006329	0	0	0	0	0	0	0	0
I(210)			0	0	0	0	0	0	0.002058	0	0	0	0.001825	0	0.005376	0.012658	0.00939	0.011236	0	0	0	0	0	0
A(27)			0	0	0	0	0.002088	0	0	0	0	0.025157	0.005474	0	0.002151	0	0	0	0	0	0	0	0	0.025
A(684)			0	0	0	0.003086	0.006263	0	0.002058	0	0	0	0.005474	0.005282	0.003226	0.00211	0.004695	0	0	0	0	0	0	0
A(701)			0	0	0	0.003086	0	0.00211	0.002058	0	0	0	0	0	0.002151	0.010549	0.004695	0.044944	0	0	0	0	0	0
K(1191)			0	0	0.010638	0	0	0	0	0	0	0.003145	0.001825	0.003521	0.003226	0.010549	0.004695	0	0	0	0	0	0	0
H(1101)			0	0	0	0	0.002088	0	0.002058	0	0	0.025157	0.001825	0.001761	0	0.00211	0.004695	0	0	0	0	0.047619	0	0
Q(1201)			0	0	0	0	0	0	0	0	0	0.003145	0.018248	0.001761	0.001075	0.004219	0	0	0	0	0	0	0	0
T(572)			0	0	0	0	0	0	0	0	0	0	0.005474	0	0.001075	0	0.00939	0.033708	0.009259	0	0	0	0.038462	0.0375
Q(1071)			0	0	0	0	0	0	0	0	0.005128	0	0	0	0.007527	0.00211	0.004695	0.044944	0	0	0	0	0	0
S(982)			0	0	0	0	0	0	0	0	0	0	0	0	0.001075	0.00211	0.028169	0.011236	0.046296	0	0	0	0	0
N(679)			0	0	0	0	0.002088	0	0	0	0	0	0	0.005282	0.009677	0.00211	0	0	0	0	0	0	0	0
R(21)			0	0	0	0	0.002088	0	0.00823	0.006849	0	0	0.001825	0	0.005376	0	0	0	0.009259	0	0	0	0	0

## Sheet: Asia
	2019-11-30	2019-12-31	2020-01-31	2020-02-29	2020-03-31	2020-04-30	2020-05-31	2020-06-30	2020-07-31	2020-08-31	2020-09-30	2020-10-31	2020-11-30	2020-12-31	2021-01-31	2021-02-28	2021-03-31	2021-04-30	2021-05-31	2021-06-30	2021-07-31	2021-08-31	2021-09-30	2021-10-31	2021-11-30
D(614)			0.438486	0.020408	0.53204	0.824216	0.825055	0.910962	0.970612	0.988592	0.991817	0.99807	0.998034	0.998448	0.998916	0.997372	0.995868	0.999088	0.998557	0.997381	0.997052	0.995238	1	0.996845	0.994872
E(484)			0	0	0.00361	0.000229	0.00044	0.001342	0.00053	0.000407	0.001723	0.00193	0.002184	0.005849	0.045624	0.120884	0.460267	0.711966	0.47114	0.155579	0.116745	0.139171	0.020576	0.025237	0.020513
P(681)			0	0	0.002256	0.010529	0.00044	0.004474	0.003442	0.00163	0.020672	0.016982	0.017912	0.0382	0.074671	0.109909	0.175182	0.256658	0.344877	0.639078	0.401533	0.172811	0.99177	0.990536	0.974359
W(152)			0	0.001855	0	0.000229	0	0.002685	0.000794	0.000815	0	0.000772	0.001092	0.005014	0.039272	0.080693	0.324611	0.569318	0.415224	0.048193	0.009434	0.007527	0.014403	0.015773	0.001923
G(769)			0	0.001855	0	0.000687	0.001758	0.000447	0.001853	0.001222	0.006891	0.001158	0.001311	0.004536	0.035089	0.079456	0.324198	0.568771	0.421717	0.048193	0.007075	0.002151	0.002058	0	0
L(452)			0	0	0.002256	0.001373	0.003077	0.000447	0	0	0.000861	0.001544	0.001529	0.010982	0.032843	0.040965	0.109627	0.184604	0.138889	0.475118	0.313679	0.184025	0.973251	0.990536	0.751923
T(19)			0	0	0	0	0	0	0	0	0	0.000386	0.000218	0.001432	0.013865	0.00201	0.02479	0.050894	0.091991	0.503405	0.403892	0.282796	0.967078	0.987382	0.624359
D(950)			0	0.001855	0.000903	0	0.000879	0.000447	0	0.000407	0	0	0.000218	0.000239	0.006507	0.001082	0.019281	0.047793	0.07684	0.467784	0.253538	0.244547	0.965021	0.987382	0.959615
T(478)			0.003155	0	0	0	0	0	0.001853	0.015278	0.003445	0.000772	0.000218	0.000477	0.012703	0.005101	0.013497	0.051623	0.093795	0.475118	0.323113	0.131797	0.923868	0.962145	0.970513
M(153)			0.039432	0.003711	0.00361	0.000916	0.001758	0.074273	0.193805	0.186596	0.193798	0.138557	0.119921	0.08583	0.073664	0.043438	0.008263	0.005837	0.006494	0.002619	0.002358	0.003072	0.014403	0.022082	0.005769
N(501)			0	0	0.000451	0	0	0	0	0.000204	0	0.001544	0.000655	0.002268	0.009992	0.071881	0.133866	0.035206	0.128066	0.152436	0.399764	0.223349	0.006173	0.003155	0.012821
Q(675)			0.003155	0	0.000451	0.001602	0.001758	0.004922	0.002648	0.004889	0.007752	0.045542	0.153997	0.112809	0.06584	0.071727	0.057155	0.052718	0.016955	0.007858	0.003538	0.00384	0	0	0.003205
T(95)			0	0	0.001805	0.000687	0.001758	0.002237	0.001059	0.00163	0.002153	0.003088	0.002621	0.008356	0.013091	0.024579	0.050406	0.089566	0.051948	0.161865	0.10967	0.038249	0.576132	0.671924	0.424359
G(142)			0	0	0.002708	0.000916	0.000879	0.000447	0.000265	0	0	0.000386	0.000437	0.000477	0.007978	0.02226	0.071065	0.124954	0.051587	0.057622	0.037146	0.013057	0.205761	0.416404	0.430769
N(439)			0.003155	0	0.000451	0	0	0	0	0.000204	0	0.000772	0.001311	0.005014	0.025329	0.047148	0.047927	0.062933	0.200577	0.149293	0.042453	0.004608	0.00823	0	0.001282
Q(677)			0.015773	0	0	0.00206	0.005714	0.008949	0.005825	0.008352	0.027132	0.019684	0.015509	0.048824	0.052595	0.0388	0.015012	0.007479	0.00974	0.018334	0.010024	0.002919	0.004115	0	0.00641
Q(1071)			0	0	0.002256	0	0	0.000447	0	0	0.000431	0.000772	0	0.000477	0.003641	0.024424	0.077675	0.121306	0.033189	0.007334	0.001179	0	0.002058	0	0
E(154)			0	0	0.001354	0	0.00044	0.000447	0.001059	0	0.000861	0.000772	0.000655	0.001313	0.004648	0.02226	0.068448	0.100146	0.025613	0.005238	0.001769	0.003379	0.016461	0.015773	0.001282
D(138)			0.003155	0	0	0.000458	0.004396	0.012528	0.009796	0.002037	0.003445	0.010035	0.00415	0.025307	0.027033	0.029062	0.021622	0.014958	0.007937	0.032478	0.022406	0.006912	0.012346	0.015773	0.001923
N(440)			0	0	0	0.000229	0.000879	0.000895	0.001059	0.002037	0.009905	0.013894	0.014854	0.014444	0.028892	0.038955	0.022724	0.002007	0.003247	0.021477	0.016509	0.004147	0	0	0.009615
L(18)			0.001577	0.001855	0.000451	0.000687	0.005275	0.000447	0.002118	0.002037	0.007321	0.008877	0.012669	0.015041	0.0189	0.023033	0.031401	0.014593	0.012987	0.039288	0.025354	0.008449	0.002058	0.009464	0.001282
L(5)			0.001577	0.011132	0.003159	0.00206	0.008352	0.006711	0.009267	0.045834	0.016365	0.007333	0.010048	0.014444	0.013246	0.01314	0.010467	0.018424	0.018759	0.014667	0.007665	0.00169	0.002058	0.009464	0.002564
A(701)			0	0	0	0	0.000879	0.005369	0.001589	0.000204	0.012489	0.029718	0.021625	0.008117	0.0134	0.051013	0.016527	0.017147	0.018398	0.003667	0.001769	0.000614	0	0.006309	0.005128
L(54)			0.004732	0	0.000903	0.004349	0.005714	0.042058	0.001324	0.00163	0.003445	0.003088	0.015727	0.016116	0.028195	0.021333	0.013497	0.001642	0.001443	0.002619	0	0	0	0	0.001282
S(12)			0	0	0	0.000687	0.00044	0.003132	0.009002	0.002852	0.004737	0.008877	0.016383	0.017071	0.021224	0.021023	0.01088	0.006385	0.011905	0.007334	0.002948	0	0	0.006309	0.000641
A(222)			0.001577	0.001855	0.000903	0.000229	0.001319	0.000447	0.002912	0.001222	0.003876	0.015052	0.008301	0.011341	0.011154	0.012058	0.009365	0.016053	0.015873	0.047145	0.018278	0.00553	0.047325	0.022082	0.021795
K(417)			0	0	0	0.000229	0	0	0	0	0	0.000386	0.000218	0.000358	0.001936	0.034008	0.021209	0.013681	0.02381	0.047669	0.042453	0.017512	0.006173	0.003155	0.009615
I(720)			0	0	0	0.000229	0	0	0	0	0.000431	0	0.001747	0.011341	0.026181	0.023497	0.026443	0.001642	0.000361	0	0	0	0	0	0
H(1101)			0	0	0.000903	0	0.002198	0.001342	0.001059	0.000815	0.001723	0.000772	0.001311	0.001552	0.003253	0.011748	0.034431	0.043962	0.01443	0.01781	0.003538	0.000154	0.014403	0	0.001282
V(1176)			0	0	0.001354	0.000458	0.001758	0.004027	0.003442	0.001222	0.001723	0.002316	0.004806	0.005849	0.009527	0.011594	0.012946	0.012039	0.007215	0.039811	0.03125	0.009217	0.002058	0.015773	0.005128
D(80)			0	0	0	0	0.000879	0.003579	0.005825	0.002037	0.003015	0.002316	0.002184	0.004656	0.006507	0.04081	0.00785	0.005108	0.016595	0.004715	0.001769	0.000461	0.010288	0.006309	0.001923
G(184)			0.001577	0	0	0	0	0.001342	0.00053	0	0.001292	0.001544	0.002621	0.021368	0.023935	0.009584	0.000689	0.000182	0.000361	0.000524	0	0.000307	0.002058	0	0.001923
G(1251)			0	0	0.000903	0.000458	0.004835	0.000447	0	0.004278	0.005168	0.011193	0	0.000836	0.008675	0.011594	0.006473	0.015688	0.021284	0.019382	0.011203	0.003687	0.004115	0	0.001282
H(655)			0.001577	0.001855	0.001805	0.000458	0.001758	0.00179	0.000794	0.00163	0.002584	0.002316	0.001529	0.001552	0.003796	0.007111	0.013084	0.012404	0.007937	0.035621	0.025354	0.006759	0.00823	0.003155	0.012179
T(1027)			0	0	0.000451	0.000458	0	0	0.00053	0.000611	0.000861	0.000386	0.000218	0.000119	0.001007	0.003246	0.015838	0.009486	0.007937	0.054479	0.057193	0.011367	0.002058	0.003155	0.000641
N(679)			0	0	0.000451	0	0	0.000895	0.00053	0.000407	0.002584	0.000386	0.000218	0.005969	0.010225	0.017623	0.014736	0.009121	0.000722	0.002619	0.002358	0.002611	0	0.003155	0.010256
S(477)			0.003155	0	0	0.000458	0	0.000895	0.000265	0.001019	0.006029	0.005017	0.006553	0.008834	0.009218	0.01314	0.007575	0.002189	0.002886	0.005238	0.005896	0.003687	0.002058	0.009464	0.012179
Q(957)			0	0	0	0	0.00044	0.000895	0	0.002241	0.036176	0.115399	0.00699	0.000119	0.000542	0.001237	0.000689	0	0.000361	0.000524	0	0	0	0	0
P(26)			0	0	0	0.001144	0.001758	0.001342	0.001059	0.001019	0.000431	0.001544	0.000437	0.002268	0.003873	0.007111	0.01088	0.010762	0.007576	0.033002	0.021816	0.006605	0.006173	0.003155	0.000641
G(1219)			0.003155	0	0.000903	0.001831	0.001758	0.000447	0.000794	0.003259	0.001292	0.000772	0.000874	0.00191	0.001936	0.00371	0.006748	0.040861	0.015152	0.002619	0.001179	0.000461	0.002058	0.003155	0.003846
D(936)			0.004732	0	0.002708	0.000687	0.001758	0.003132	0.001853	0.002444	0.000861	0.001158	0.002403	0.004894	0.006507	0.007111	0.011018	0.001094	0.007576	0.019382	0.021816	0.003379	0.002058	0.003155	0.001923
T(20)			0	0	0	0.000458	0.000879	0.000447	0.00053	0.004278	0.003015	0.001158	0.000218	0.003462	0.002014	0.006183	0.010191	0.009486	0.006854	0.032478	0.024764	0.006605	0	0.003155	0.001282
H(49)			0.025237	0.024119	0	0.000687	0.003956	0.001342	0.002648	0.001426	0.00646	0.002316	0.004369	0.013728	0.006042	0.004947	0.003994	0.005655	0.006854	0.001572	0.00059	0.000154	0	0	0.000641
S(939)			0.001577	0	0	0.000687	0.000879	0.000895	0.001059	0.000815	0.002153	0	0.002184	0.006804	0.003408	0.003246	0.008539	0.002736	0.007576	0.027239	0.025943	0.003994	0	0.003155	0.003846
A(27)			0.001577	0	0.000451	0.000229	0.00044	0.000447	0.000794	0.000611	0.001292	0.000386	0.001966	0.006924	0.008211	0.010357	0.013221	0.002189	0.000361	0.000524	0.001179	0.000154	0.004115	0	0.001282
G(932)			0	0	0	0	0	0	0	0.000407	0.003015	0.031648	0.029489	0.005133	0.0055	0.003401	0.000413	0	0	0	0.003538	0	0	0	0
I(850)			0	0	0	0	0	0	0	0	0	0.000386	0	0	7.7e-05	0	0.000138	0	0	0.00681	0.006486	0.006452	0.041152	0.059937	0.167949
T(716)			0	0	0.000451	0.000229	0	0	0	0.000407	0.000861	0.000386	0.000874	0.001074	0.002634	0.007265	0.013772	0.012951	0.006494	0.007858	0.017689	0.003994	0.006173	0	0.001923
V(213)			0	0	0.002256	0.001831	0.006593	0.001342	0.000794	0.001019	0.003876	0.00193	0.001966	0.004894	0.009527	0.010203	0.008263	0.000365	0.000722	0.000524	0.001769	0.000154	0.002058	0	0.001282
S(256)			0	0	0	0	0	0	0.000265	0.000815	0.000431	0	0.001092	0.00764	0.016964	0.005101	0.002479	0.000365	0.000361	0.002619	0	0.000154	0	0	0.001282
D(1118)			0	0	0	0	0	0.005369	0.001324	0	0	0.00386	0.000655	0.001671	0.001704	0.005874	0.019006	0.011127	0.005051	0.005762	0.004127	0.001382	0.006173	0	0
R(190)			0	0	0	0.000229	0.00044	0	0	0.000611	0.000431	0.000386	0	0.000358	0.001239	0.002937	0.008952	0.009303	0.005772	0.035621	0.026533	0.005837	0.002058	0.003155	0.002564
K(795)			0	0	0	0	0	0.000447	0	0	0	0	0	0	0.002789	0.00572	0.013772	0.017694	0.01443	0.008381	0	0	0	0	0
F(157)			0	0	0	0.000229	0	0.000447	0.000265	0.000407	0	0	0.001311	0.004297	0.004338	0.008811	0.003718	0.002554	0.009019	0.009953	0.003538	0.001997	0.090535	0.015773	0.003205
L(1063)			0	0	0	0	0.00044	0.000447	0.002118	0	0	0.001544	0.000218	0.008237	0.011851	0.006029	0.001928	0	0.000361	0	0	0	0	0	0.000641
A(1078)			0.006309	0	0.001354	0.000687	0.003077	0	0.000265	0.001833	0.001723	0.000772	0.00284	0.007282	0.00519	0.004483	0.001377	0.002371	0.011183	0.003143	0	0	0.012346	0.012618	0.011538
A(570)			0.004732	0	0	0.000229	0	0	0	0	0.000861	0	0.000218	0.001552	0.001704	0.00541	0.012808	0.011675	0.005411	0.004191	0.002358	0.001997	0.00823	0.003155	0.000641
S(255)			0	0	0.000451	0.000229	0.00044	0.00179	0.000265	0	0.000431	0.000772	0.000218	0.006685	0.005655	0.008811	0.005096	0.001277	0.001082	0.002619	0.001769	0.000768	0.004115	0.003155	0.003205
R(158)			0	0	0	0.000229	0	0	0.000265	0.000611	0.000431	0	0	0.000239	7.7e-05	0.000309	0	0.000547	0.001443	0.004715	0.001179	0.000461	0.302469	0.164038	0.021154
K(77)			0.003155	0	0.001354	0.002976	0.004835	0.000447	0	0.001019	0.000431	0	0.000437	0.000239	0.002246	0.000928	0.000964	0.007844	0.00938	0.03143	0.007665	0.004916	0.002058	0	0
S(982)			0	0	0	0	0	0	0	0.000407	0	0	0.000218	0.000239	0.001239	0.005565	0.011844	0.011857	0.005772	0.004191	0.008844	0.000768	0.006173	0	0
A(67)			0	0.001855	0.000903	0.001373	0.00044	0.000895	0.001059	0.000407	0.003015	0.000772	0.001092	0.005491	0.004493	0.001546	0.004545	0.001642	0.001804	0.003667	0.001179	0.002765	0	0.015773	0.010256
P(1162)			0.001577	0.003711	0.000903	0.000458	0.000879	0.000895	0.000265	0.000611	0.002153	0.00193	0.001747	0.001313	0.003331	0.00912	0.00482	0.003283	0.005411	0.005762	0.003538	0	0.004115	0.003155	0.003846
A(522)			0.001577	0	0.000903	0.000687	0.001758	0.014765	0.000265	0.001833	0.005599	0.004631	0.000655	0.002268	0.002634	0.003401	0.002341	0.001459	0.002525	0.002619	0.00059	0.002611	0	0	0.000641
V(1264)			0	0	0	0.000687	0	0.00179	0.000265	0.000204	0	0.000386	0.002184	0.002507	0.001239	0.002783	0.001515	0.004378	0.006854	0.008381	0.002948	0.000614	0.004115	0.059937	0.022436
P(793)			0	0	0	0	0	0.001342	0	0	0	0	0.014198	0.012773	0.001472	0.000155	0.000138	0.000547	0	0.000524	0	0	0	0	0
N(148)			0.001577	0	0	0.000229	0.00044	0	0.000265	0.001222	0	0	0.003277	0.005969	0.001472	0.000773	0.004269	0.004743	0.001082	0.000524	0.001179	0.003072	0.012346	0.022082	0.002564
V(1104)			0	0.001855	0	0	0.000879	0.000447	0.00053	0.000407	0.000431	0.002702	0.000874	0.002149	0.001782	0.001237	0.000689	0.001459	0.006494	0.009953	0.009434	0.001075	0.00823	0.059937	0.020513
A(688)			0	0	0.000451	0.000458	0.002198	0.001342	0.00053	0.001222	0.000861	0.005789	0.000655	0.004297	0.004338	0.004328	0.001377	0.001642	0.002165	0.002619	0	0.000154	0	0	0.003846
S(98)			0.001577	0	0	0.000229	0.004396	0.000447	0.001589	0.001222	0.005168	0.003088	0.001747	0.003462	0.003021	0.004483	0.002617	0.001824	0.001804	0.003143	0.001179	0	0.002058	0.003155	0
D(215)			0.003155	0.001855	0	0.000687	0	0.00179	0	0.000407	0.000861	0.00193	0.001966	0.002984	0.004028	0.002783	0.001928	0.003283	0.003608	0.002619	0.001179	0	0.00823	0.015773	0.00641
A(520)			0	0	0.000451	0	0.006593	0.000447	0.00053	0.001426	0.001723	0.000386	0.001311	0.003581	0.003718	0.003092	0.003305	0.000547	0.001804	0.001572	0.001179	0.000461	0	0	0.003846
Q(218)			0	0	0	0	0	0	0.000265	0.000204	0.000861	0.000386	0	0.005133	0.002634	0.004328	0.003856	0.005472	0.000722	0.000524	0.001179	0	0.004115	0.006309	0.001282
A(845)			0.001577	0	0.000903	0.000458	0.000879	0.00179	0.00053	0.000204	0.001292	0.00193	0.002403	0.002029	0.001472	0.004638	0.00303	0.002007	0.002886	0.005238	0.001179	0.002611	0.004115	0	0.005128
Q(23)			0	0	0	0	0	0	0.00053	0.000407	0	0.001158	0.003495	0.006924	0.004183	0.00371	0.001102	0.001824	0	0	0	0	0	0	0
S(640)			0	0	0	0.000458	0.00044	0.000447	0.008472	0.008556	0.004307	0.000386	0.000437	0.001194	0.001084	0.001855	0.002204	0.003831	0.001443	0.002619	0	0.000154	0	0	0.001923
S(943)			0	0	0.001354	0.000458	0.00044	0	0	0.000204	0.003445	0.001544	0.001529	0	0.000232	0.000618	0.003856	0.000365	0.002525	0.001048	0.060731	0.000154	0	0	0.000641
N(481)			0	0	0	0	0.004396	0.004922	0.002118	0.000815	0.000861	0.005017	0.001311	0.004178	0.004338	0.004328	0	0	0	0.000524	0.00059	0	0.002058	0	0
Q(613)			0.001577	0	0	0.001602	0.001319	0.001342	0.000265	0.001019	0	0.001158	0.004806	0.002746	0.003098	0.003092	0.000826	0.000547	0	0.001572	0.004127	0.000307	0.002058	0.018927	0.010256
I(210)			0	0	0	0	0	0	0	0	0	0	0.000218	0.000239	7.7e-05	0.000464	0.006197	0	0.002886	0.020953	0.021816	0.004147	0.002058	0	0.003205
V(1228)			0.001577	0.005566	0	0.000687	0.00044	0	0.000265	0.000611	0.002153	0.002316	0.001311	0.005014	0.004183	0.001855	0.001239	0.000182	0.001443	0.004191	0.001179	0.000307	0	0.003155	0.003846
P(812)			0	0.001855	0.000451	0.000229	0.001319	0.011186	0.006619	0.000407	0.000861	0.001544	0.001311	0.000955	0.001239	0.003092	0.002617	0.002189	0	0.003143	0.001179	0.000768	0.004115	0	0.005128
E(96)			0.003155	0	0.000903	0.000229	0	0.000447	0.000265	0	0.000861	0.001158	0.001092	0.005133	0.003796	0.004328	0.002617	0.000365	0.001082	0	0	0	0	0	0.002564
F(888)			0	0	0	0.000229	0	0	0	0	0	0	0	0	0.000155	0	0.003168	0.000547	0.001443	0.009429	0.009434	0.013518	0	0	0.000641
A(879)			0	0	0.000451	0	0.002198	0.001342	0.001059	0.001222	0.009044	0.004631	0.001966	0.002387	0.001549	0.004483	0.000826	0.001094	0.001082	0.000524	0	0	0.010288	0.012618	0.000641
S(689)			0	0	0	0.000458	0	0.000447	0	0	0.000431	0.001158	0.004369	0.003223	0.004105	0.002319	0.001928	0.000547	0.001082	0.001048	0	0	0	0	0.001282
A(829)			0.003155	0.009276	0.056408	0.000458	0	0	0	0.000204	0.000431	0.000772	0	0	0.000232	0.000155	0	0.000182	0	0	0	0	0	0	0.001923
T(859)			0	0	0	0.000458	0	0.001342	0.000265	0.000407	0.001292	0.000386	0.001311	0.002149	0.001859	0.00201	0.003305	0.001824	0.00469	0.003667	0.002358	0.000307	0	0	0.004487
V(382)			0.001577	0	0.002708	0	0	0	0.000265	0.000204	0	0	0.000218	0.000716	0.000697	0.002937	0.007024	0.00602	0.002886	0.000524	0.001179	0	0	0	0
A(262)			0	0	0.002708	0.000916	0.000879	0.002685	0.000794	0.000611	0.001723	0.00386	0.002184	0.003939	0.001472	0.002164	0.001515	0.000547	0.000722	0.001048	0	0	0.004115	0.006309	0.001282
M(1237)			0	0	0.001354	0.000458	0.00044	0.003132	0.00053	0.000611	0.001292	0.001158	0.003495	0.001432	0.001859	0.002319	0.000964	0.001277	0.000361	0.000524	0.004127	0.000922	0.024691	0	0.001923
N(751)			0	0	0.001354	0	0	0	0	0	0	0	0.000218	0	0	0	0.003718	0.013134	0.00974	0.001572	0	0	0	0	0
R(214)			0	0	0	0.000229	0.000879	0.000447	0.000265	0.001222	0.000861	0.000772	0.003495	0.003581	0.002324	0.001237	0.002066	0.00073	0.000722	0.002619	0.00059	0	0.002058	0	0.000641
G(181)			0.001577	0.001855	0.000451	0	0	0.004027	0.000265	0.000815	0.000861	0.000386	0.000437	0.000597	0.001084	0.001546	0.001377	0.002007	0	0.004191	0.004717	0.000614	0.032922	0.006309	0.009615
T(22)			0	0	0.004061	0.001602	0.000879	0.000447	0.001589	0.001426	0.003445	0.000772	0.000437	0.001432	0.001782	0.00201	0.001653	0.002554	0.000361	0	0.001179	0.000154	0	0.003155	0.000641
D(1153)			0	0	0.000903	0.000458	0.00044	0.000895	0	0	0.000431	0.000386	0	0.000239	0.00062	0.002628	0.005647	0.00602	0.003608	0.001048	0.00059	0	0	0	0
R(78)			0.003155	0	0	0.000229	0.003516	0.00179	0.001589	0.000204	0.002153	0.003474	0.008956	0.000358	0.00062	0.000464	0.000689	0.001094	0.002525	0.002095	0.00059	0.000768	0.002058	0	0
G(75)			0	0	0	0.000916	0.00044	0.00179	0.000794	0.001019	0.002584	0.000772	0.000437	0.001671	0.003641	0.001855	0.000689	0.000912	0.000361	0.001572	0.00059	0	0	0	0.001282
V(1133)			0	0	0	0	0.00044	0.00179	0	0.000815	0.000861	0.001158	0.008737	0.004059	0.001239	0.000928	0.000275	0	0	0.000524	0.00059	0	0.004115	0.003155	0
T(29)			0	0	0	0	0.00044	0.008054	0.000794	0.001019	0	0.001158	0.001747	0.001791	0.001859	0.001391	0	0.000547	0	0.000524	0.00059	0.000461	0.002058	0	0.012179

## Sheet: Europe
	2019-11-30	2019-12-31	2020-01-31	2020-02-29	2020-03-31	2020-04-30	2020-05-31	2020-06-30	2020-07-31	2020-08-31	2020-09-30	2020-10-31	2020-11-30	2020-12-31	2021-01-31	2021-02-28	2021-03-31	2021-04-30	2021-05-31	2021-06-30	2021-07-31	2021-08-31	2021-09-30	2021-10-31	2021-11-30
D(614)			0.939057	0.511494	0.780352	0.891097	0.966566	0.986949	0.983064	0.998263	0.999408	0.999008	0.999399	0.996525	0.994742	0.985344	0.979231	0.990218	0.996347	0.994194	0.994403	0.981763	0.99375	0.990826	0.988889
A(222)			0.385676	0.011494	0.00051	0.00044	0.001079	0.003489	0.024014	0.177035	0.372283	0.549093	0.594383	0.622368	0.572554	0.501956	0.428749	0.239169	0.075495	0.021287	0.030784	0.06079	0.1125	0.122324	0.053333
L(18)			0.12411	0.002874	0.00068	0.002641	0.002804	0.010854	0.008595	0.039534	0.116419	0.212913	0.235013	0.187704	0.157355	0.19515	0.26502	0.429028	0.571689	0.646347	0.611007	0.206687	0.15625	0.021407	0.006667
S(477)			0.08363	0.002874	0.00017	0.002138	0.00604	0.001809	0.007583	0.073756	0.101141	0.104321	0.121527	0.134173	0.157853	0.144041	0.130446	0.0555	0.014612	0.005322	0.078825	0.027356	0	0.036697	0.046667
S(98)			0.030249	0.008621	0.000623	0.001698	0.003667	0.002584	0.012386	0.024313	0.0262	0.02884	0.039908	0.066537	0.080647	0.094672	0.070039	0.02216	0.005479	0.008224	0.005597	0	0.0125	0.003058	0.015556
A(262)			0.064502	0	0.00017	0.000692	0.000647	0.000517	0.002528	0.015017	0.025769	0.036117	0.042989	0.041292	0.057212	0.063777	0.067811	0.075265	0.043227	0.005322	0.002799	0.006079	0.00625	0.009174	0.013333
E(484)			0.002669	0	0.000227	6.3e-05	0.000431	0.000258	0	0.000102	0.000215	0.000271	0.000526	0.001456	0.008958	0.023288	0.102994	0.46656	0.696499	0.810837	0.643657	0.264438	0.1	0.061162	0.04
D(138)			0.00089	0	5.7e-05	0.000314	0.00151	0.000905	0.002781	0.000613	0.001506	0.000932	0.00258	0.00626	0.016813	0.038626	0.106598	0.336394	0.54825	0.638123	0.602612	0.227964	0.10625	0.100917	0.157778
N(501)			0.001335	0	0	0	0	0.000129	0.000253	0	0.000161	0.00018	0.000651	0.00115	0.006145	0.027573	0.109874	0.389898	0.641705	0.719884	0.646455	0.273556	0.10625	0.045872	0.046667
H(655)			0.027135	0	0.000113	0.000755	0.00151	0.000129	0.002781	0.004393	0.007209	0.007548	0.008843	0.001814	0.004782	0.020866	0.07849	0.325015	0.543683	0.636672	0.604011	0.212766	0.1	0.021407	0.037778
P(272)			0.04048	0	5.7e-05	6.3e-05	0.000431	0.000258	0	0.011135	0.020658	0.028719	0.03367	0.032732	0.047085	0.050953	0.051366	0.02755	0.004262	0.00387	0.002332	0	0.00625	0.009174	0.02
P(26)			0.001335	0	0	0.000817	0.003451	0.002843	0.014661	0.006027	0.002421	0.003909	0.006038	0.003807	0.006427	0.017202	0.073511	0.321421	0.542161	0.63909	0.604944	0.206687	0.09375	0.027523	0.008889
T(1027)			0	0	0.000227	0.00044	0.000431	0	0.000253	0.000204	0.000377	0.000571	0.000426	0.000741	0.004241	0.016394	0.080194	0.358155	0.573212	0.662313	0.614739	0.209726	0.1	0.018349	0.004444
V(1176)			0.001335	0	0.000227	0.000314	0.000431	0.000129	0.001011	0.001328	0.000484	0.000872	0.001052	0.001738	0.00766	0.020307	0.074559	0.321022	0.540944	0.633285	0.604011	0.209726	0.09375	0.018349	0.008889
P(681)			0.002224	0	0.000623	0.000189	0.000216	0.000388	0.000253	0.000102	0.000807	0.001293	0.00481	0.010246	0.017982	0.039589	0.086091	0.178279	0.284018	0.350266	0.273787	0.81155	0.71875	0.642202	0.926667
T(20)			0.001779	0	0.00068	0.000252	0.001294	0.001163	0.002022	0.000204	0.000269	0.00012	0.000952	0.00069	0.003895	0.016394	0.069842	0.31663	0.536682	0.635704	0.603078	0.209726	0.09375	0.018349	0.004444
R(190)			0	0	0.000113	6.3e-05	0	0	0	0	0.000323	0.001654	0.002205	0.000869	0.003246	0.015805	0.06899	0.304652	0.528463	0.634253	0.603545	0.206687	0.1	0.027523	0.033333
K(417)			0	0	0	6.3e-05	0	0	0	0.000204	0	0	0.00015	5.1e-05	0.002553	0.014656	0.069711	0.324017	0.54551	0.637639	0.611007	0.200608	0.1	0.021407	0.044444
L(5)			0.011566	0.005747	0.006005	0.00874	0.014021	0.014085	0.011881	0.022066	0.020121	0.018765	0.018839	0.017912	0.020059	0.027169	0.031318	0.041525	0.045053	0.018384	0.011194	0.033435	0.075	0.021407	0.024444
N(439)			0.001779	0	0.000737	0.002515	0.002373	0.000517	0.013145	0.016447	0.010921	0.009413	0.009745	0.018474	0.029601	0.031764	0.027059	0.007387	0.005479	0	0.000933	0	0.0125	0.006116	0.02
L(452)			0.003114	0	0.000113	6.3e-05	0	0.000129	0	0.000204	5.4e-05	0.000902	0.001503	0.004855	0.009716	0.02248	0.052349	0.109802	0.090715	0.09821	0.173041	0.680851	0.68125	0.629969	0.924444
Q(675)			0.001779	0	0.003569	0.001258	0.011217	0.002197	0.001011	0.000613	0.001829	0.002526	0.005511	0.010527	0.019778	0.027355	0.043242	0.030745	0.007915	0.004354	0.00653	0.009119	0.0375	0.036697	0.008889
D(936)			0.007117	0	0.018073	0.043825	0.050906	0.009433	0.010111	0.008479	0.001991	0.001804	0.002104	0.002453	0.00634	0.008756	0.017886	0.046516	0.059056	0.024673	0.010261	0.006079	0.00625	0.009174	0.015556
D(1163)			0.01468	0	0.00051	0.001258	0.000216	0.000129	0.002528	0.007457	0.025877	0.015698	0.010146	0.008151	0.009261	0.015432	0.011007	0.004592	0.000304	0.001451	0.000466	0.00304	0	0	0
E(583)			0.040925	0	0.000283	0.000503	0.000431	0	0.003033	0.001022	0.007478	0.018645	0.022697	0.013772	0.005734	0.005713	0.0076	0.009782	0.004566	0.005322	0.001399	0	0	0.006116	0.013333
T(478)			0.000445	0	0.000113	0.003081	0.002804	0.000258	0	0	5.4e-05	0.000451	0.000501	0.000997	0.004198	0.009284	0.012383	0.023757	0.053272	0.058055	0.168843	0.665653	0.68125	0.617737	0.948889
T(716)			0	0	0.00051	0.001069	0.000647	0.001163	0.000758	0	0.000377	0.000541	0.000802	0.001865	0.004393	0.014749	0.044356	0.06668	0.090411	0.139816	0.017257	0.027356	0	0.009174	0.002222
D(80)			0.022687	0	0.000397	0.001509	0.000216	0.000517	0.003792	0.038819	0.01388	0.009262	0.00962	0.007819	0.006838	0.004626	0.00701	0.013376	0.011263	0.012095	0.014459	0.006079	0	0.012232	0.015556
Q(677)			0.004004	0	0.000283	0.000566	0.002157	0.001163	0.004044	0.002554	0.001937	0.002015	0.006789	0.009531	0.009348	0.0145	0.023193	0.035536	0.027397	0.017417	0.004664	0.00304	0.04375	0.012232	0.031111
A(1078)			0.003559	0	0.000623	0.001006	0.000647	0.005298	0.0182	0.001022	0.001668	0.002195	0.003933	0.007589	0.016359	0.020369	0.0152	0.007187	0.001218	0.001451	0.000466	0.00304	0	0.003058	0.011111
T(95)			0.00089	0	0.001076	0.00132	0.002588	0.000905	0.002275	0.001022	0.002044	0.002586	0.004409	0.003756	0.004782	0.006024	0.0095	0.065083	0.094977	0.087083	0.062966	0.231003	0.28125	0.207951	0.32
K(1073)			0.02669	0	0.000567	0.003018	0.00302	0.000388	0	0.005108	0.007962	0.00815	0.007967	0.008713	0.010992	0.008011	0.011073	0.006189	0	0.000968	0	0	0.00625	0.009174	0
M(153)			0.004893	0.002874	0.00034	0.001258	0.002157	0.001809	0.002781	0.005823	0.003658	0.002797	0.004083	0.005034	0.006621	0.016022	0.028369	0.018167	0.011872	0.001935	0.009328	0.015198	0.03125	0.06422	0.131111
Q(1071)			0.003559	0	0	0.000189	0	0.000129	0	0.000204	0.000108	0.000241	0.000902	0.003117	0.009045	0.012389	0.015659	0.066081	0.053272	0.02806	0.001399	0	0	0	0
D(215)			0.012011	0	0.000397	0.000189	0.009707	0.002843	0.001517	0.002554	0.005003	0.007819	0.011173	0.005391	0.004155	0.005496	0.007993	0.010581	0.009437	0.005322	0.008862	0.00304	0.00625	0.012232	0.033333
G(1167)			0.015569	0	0.000283	6.3e-05	0	0.000258	0.000253	0.004903	0.024693	0.015457	0.007941	0.004855	0.00132	0.001118	0.000983	0.001597	0.003044	0.001451	0.001399	0.012158	0.0125	0	0.006667
T(19)			0	0	0.000227	0.000126	0.000431	0.000388	0	0	0.000915	0.002346	0.001228	0.000945	0.000736	0.001956	0.005241	0.003194	0.009437	0.044993	0.150187	0.607903	0.6125	0.577982	0.842222
L(54)			0.000445	0	0.001416	0.00459	0.005824	0.002197	0.001011	0.001941	0.000915	0.001684	0.005061	0.006158	0.011165	0.010557	0.007207	0.001597	0.000913	0.000484	0	0	0	0.006116	0.002222
G(1219)			0.000445	0	0.000737	0.00132	0.001726	0.003618	0.002528	0.001226	0.000861	0.001022	0.004735	0.007947	0.008482	0.010029	0.011531	0.009982	0.004262	0.008224	0.010728	0.006079	0	0	0.004444
G(142)			0	0	0.000567	0.000252	0.000216	0.000646	0.000253	0.000204	0.000377	0.000421	0.000351	0.000358	0.000411	0.000652	0.005831	0.061889	0.059665	0.062893	0.078358	0.522796	0.30625	0.348624	0.666667
H(49)			0	0.005747	0.000397	0.001886	0.003451	0.000517	0.002022	0.000511	0.000753	0.001053	0.001002	0.001763	0.002813	0.002608	0.003866	0.009782	0.003653	0.091921	0.404384	0.015198	0.025	0.006116	0.008889
A(688)			0.001335	0.002874	0.00017	0.000943	0.00151	0.001421	0.004803	0.004903	0.00893	0.007308	0.007916	0.003654	0.004587	0.007794	0.0038	0.001996	0.000304	0.005806	0.004664	0.00304	0.00625	0.003058	0.008889
S(939)			0	0.002874	0.000283	0.00132	0.005177	0.00168	0.001769	0.001737	0.001184	0.001744	0.002505	0.003756	0.006275	0.005403	0.015266	0.043322	0.035008	0.022738	0.009795	0.006079	0	0	0.004444
D(950)			0	0	5.7e-05	0.000314	0.000431	0.000129	0.000253	0	0.000161	9e-05	2.5e-05	0.000383	0.000433	0.000559	0.000655	0.007387	0.021918	0.045477	0.160448	0.653495	0.65625	0.593272	0.72
L(176)			0.003114	0.002874	0.000737	0.000629	0.000431	0.001034	0.002528	0.004903	0.003443	0.009353	0.00962	0.005187	0.003051	0.003167	0.003669	0.003194	0.003044	0.000968	0.001866	0	0.0125	0	0.026667
P(1162)			0.001335	0	0.00102	0.001446	0.004098	0.001421	0.001011	0.001124	0.001722	0.002286	0.005386	0.00534	0.007985	0.007949	0.008321	0.003793	0.001522	0.000484	0	0	0	0.003058	0
G(769)			0.001779	0	0.00051	0.001383	0.000863	0.006719	0.005056	0.003882	0.010222	0.001534	0.001678	0.001686	0.004652	0.007794	0.017297	0.014574	0.013394	0.003387	0.000466	0	0	0	0.008889
A(845)			0.002224	0	0.00204	0.00088	0.004961	0.001034	0.001264	0.001634	0.001184	0.001624	0.002054	0.002019	0.003679	0.009657	0.021686	0.017968	0.015525	0.023222	0.004664	0	0	0.003058	0
D(1118)			0.00089	0	0.00017	0.000126	0.000216	0	0.000253	0.002247	0.000861	6e-05	0.00015	0.000894	0.001017	0.004409	0.027321	0.05011	0.07519	0.055636	0.016791	0.024316	0	0	0.002222
A(570)			0.001335	0	0.000113	0.000252	0	0	0	0.000306	0.00043	0.000271	0.000576	0.00069	0.001277	0.004037	0.027845	0.045318	0.074886	0.055152	0.020056	0.024316	0	0	0.013333
A(626)			0.003559	0	0.000113	0.000126	0.000216	0.000129	0.002528	0.019614	0.014633	0.009743	0.005762	0.00184	0.001277	0.001646	0.001376	0.001198	0.003044	0	0.000933	0	0	0	0.013333
S(982)			0	0	0	6.3e-05	0	0	0	0	0	0	0.000125	0.00023	0.001082	0.004223	0.027976	0.045718	0.07519	0.054669	0.015392	0.024316	0	0	0
P(812)			0	0	0.000283	0.000377	0.000216	0.000129	0.001264	0.000715	0.001775	0.003639	0.001804	0.006158	0.007833	0.00711	0.004193	0.003594	0.005479	0.031447	0.003731	0	0	0	0.002222
A(1020)			0.001335	0	0.000737	0.001446	0.001726	0.001034	0.003539	0.000919	0.001722	0.002496	0.00466	0.007998	0.0066	0.003136	0.004652	0.007187	0.00274	0.00387	0.002799	0	0	0	0.006667
R(21)			0.003114	0	0.002153	0.003458	0.006903	0.034113	0.026289	0.009092	0.006025	0.006947	0.003658	0.000945	0.000476	0.000838	0.000983	0.002196	0.000609	0.00387	0.005597	0.006079	0.01875	0.006116	0.004444
A(522)			0	0	0.00051	0.000629	0.00151	0.000775	0.001517	0.004495	0.001345	0.000812	0.001503	0.001738	0.004155	0.010371	0.020114	0.015173	0.006393	0.000484	0.000466	0	0	0	0.013333
S(673)			0.005338	0	0	0.000189	0.000216	0	0	0.003984	0.001614	0.002797	0.005061	0.009633	0.005128	0.004316	0.002359	0.001597	0	0	0	0	0	0	0.013333
G(181)			0.00089	0	0.00085	0.000943	0	0.000517	0.001517	0.002145	0.005595	0.007398	0.004534	0.002913	0.003657	0.003478	0.002621	0.001198	0.003653	0.003387	0.002332	0.027356	0.03125	0.003058	0.042222
S(813)			0.003114	0.002874	0.000113	0.000252	0	0.000129	0	0.000306	0.000269	0.00015	0.004184	0.004932	0.002662	0.003602	0.008452	0.024157	0.037443	0.040155	0.004198	0	0	0	0
D(796)			0.000445	0	0.000113	0.000252	0.000647	0.000388	0.000253	0.000919	0.000646	0.000451	0.001678	0.003628	0.004003	0.010992	0.010548	0.007187	0.010046	0.01403	0.000466	0.006079	0	0	0.031111
N(440)			0	0	0	6.3e-05	0	0	0	0.000102	0.00043	0.000481	0.000125	0.000741	0.000909	0.004937	0.022276	0.046117	0.038356	0.022738	0.009328	0.00304	0.00625	0.003058	0.042222
S(256)			0.00089	0	0	6.3e-05	0	0	0	0.000102	0.000807	0.005293	0.008693	0.005443	0.003657	0.001273	0.001507	0.000799	0.001218	0.000484	0	0	0.00625	0	0.02
N(679)			0	0	0	0.000692	0.001294	0.000129	0	0.000817	0.000538	0.000361	0.001403	0.00787	0.004198	0.006055	0.0057	0.004991	0.004262	0.000968	0.001399	0.00304	0	0	0.031111
T(723)			0.004893	0	0	0	0.000216	0.000129	0	0.022474	0.012804	0.005624	0.004635	0.000511	0.000476	0.000311	0.000328	0.0002	0	0	0	0	0	0	0.008889
S(494)			0.00089	0	0.000113	0.000692	0.000216	0.000129	0	0.002145	0.000269	0.000421	0.000551	0.00115	0.002402	0.005993	0.011728	0.01138	0.017656	0.082245	0.000466	0	0	0.003058	0.013333
S(255)			0.002224	0	0.00034	0.00088	0.000431	0.000775	0	0.004597	0.006133	0.006766	0.005161	0.002734	0.001645	0.000776	0.001376	0.001996	0	0	0	0	0.01875	0.003058	0.022222
T(51)			0.005338	0	5.7e-05	0.000126	0	0	0	0.002247	0.001991	0.000541	0.00233	0.00184	0.004544	0.008197	0.008255	0.001397	0.000304	0	0	0	0	0	0
V(1122)			0.001335	0	0.000113	6.3e-05	0.001079	0.001292	0.006825	0.004291	0.004465	0.002977	0.004033	0.002811	0.002337	0.004316	0.003472	0	0.000304	0	0	0	0.01875	0.003058	0.006667
N(164)			0.018238	0	0	0	0	0	0	0.000204	0.00043	0.005323	0.006764	0.004906	0.001623	0.001025	0.000721	0.001198	0.001522	0.001451	0.000466	0	0.00625	0	0.024444
M(1229)			0.000445	0	0.00034	6.3e-05	0.000647	0.000258	0.001517	0.002452	0.002313	0.003067	0.003983	0.001661	0.002943	0.005341	0.005504	0.000998	0	0.001935	0.001866	0	0	0.006116	0
F(157)			0	0	0	6.3e-05	0	0.000129	0	0.001124	0.000968	0.001083	0.001678	0.002223	0.003549	0.004844	0.004586	0.007986	0.004262	0.005806	0.006063	0.054711	0.0375	0.082569	0.146667
E(154)			0	0	5.7e-05	0.000189	0.000216	0	0.000253	0.000409	0.000269	0.000211	0.0001	0.000153	0.000368	0.0009	0.004652	0.062088	0.05449	0.029511	0.004198	0.012158	0.03125	0.06422	0.126667
W(152)			0	0	0.000113	0.00044	0	0.000129	0.000506	0.000204	0.000538	0.000241	0.000601	0.001584	0.002077	0.003974	0.011924	0.017369	0.014003	0.007741	0.004198	0.012158	0.03125	0.067278	0.128889
H(146)			0.00089	0	5.7e-05	0.00044	0.00151	0.003618	0.003286	0.002554	0.00382	0.005503	0.003482	0.001022	0.001125	0.001801	0.001245	0.001198	0.003957	0.003387	0.003731	0.012158	0.03125	0.06422	0.131111
Y(144)			0	0	5.7e-05	0	0	0	0	0	5.4e-05	0.000271	0.0002	0.000307	0.000952	0.001553	0.015331	0.021561	0.016743	0.033866	0.020989	0.054711	0.03125	0.070336	0.131111
V(622)			0.00089	0	0.000397	0.002515	0.000431	0	0.008089	0.007253	0.009791	0.003128	0.001854	0.001508	0.001255	0.001739	0.002097	0.001397	0.000304	0.000484	0	0	0	0.003058	0.013333
D(1084)			0.004004	0	5.7e-05	0.000314	0.000863	0.000646	0.015672	0.020329	0.006402	0.002406	0.001704	0.000639	0.001385	0.001646	0.000852	0.000799	0.001218	0.000484	0.006996	0	0.00625	0	0.004444
S(12)			0.002224	0	0.001076	0.000566	0.001079	0.000129	0.001517	0.000817	0.000915	0.000992	0.001253	0.003015	0.002488	0.001925	0.006945	0.018766	0.014307	0.01016	0.001399	0.00304	0	0	0.002222
T(732)			0	0	0	0	0	0	0	0.000204	5.4e-05	0.00015	0.0002	0.000869	0.003159	0.00472	0.009697	0.016371	0.036834	0.000968	0.001399	0	0	0	0.008889
T(859)			0.001335	0	0.000113	0.001761	0.001294	0.001292	0.000758	0.002043	0.00226	0.001113	0.001779	0.003398	0.003527	0.002267	0.0019	0.00559	0.004566	0.004354	0.008396	0.00304	0	0.006116	0.006667
R(102)			0.000445	0	0.00017	0.000817	0.000216	0.000388	0.001264	0.000511	0.00113	0.000962	0.000576	0.001175	0.002878	0.003757	0.003997	0.001198	0.009741	0.087083	0.000466	0	0.00625	0.003058	0.011111
I(233)			0	0	0	0.000252	0	0.000129	0	0	0.000161	0.000391	0.006213	0.006746	0.002618	0.000776	0.000459	0	0.000304	0	0	0	0	0	0.008889
Q(613)			0.001779	0	0.000397	0.000566	0.000216	0.001163	0.000758	0.000306	0.000323	0.002616	0.002981	0.002657	0.00277	0.002639	0.002031	0.001996	0.001826	0.009192	0.009795	0.066869	0.01875	0.012232	0.02
S(1252)			0	0	0.000113	6.3e-05	0.000431	0.001809	0	0.000919	0.000484	0.004421	0.004134	0.003705	0.001645	0.002298	0.001245	0.000998	0.000304	0.000484	0.000466	0.012158	0	0	0.004444
P(1263)			0.001335	0.04023	0.007025	0.005659	0.007118	0.006978	0.002022	0.000306	0.000269	0.000632	0.000877	0.001584	0.000779	0.001087	0.003603	0.00539	0.017352	0.002903	0.000933	0	0	0	0
I(210)			0	0	0	0	0	0	0.000253	0.000204	0.000269	9e-05	2.5e-05	0.000128	0.000584	0.001459	0.010024	0.039928	0.035312	0.025641	0.008396	0.00304	0.00625	0.006116	0.037778
A(879)			0.005338	0	0.003513	0.004527	0.004961	0.005556	0.001769	0.001022	0.000753	0.000722	0.001378	0.001073	0.001407	0.00354	0.004193	0.002595	0.000913	0.000484	0.002799	0	0	0	0
V(1104)			0.000445	0	0.00017	0.000943	0.001079	0.002843	0.002528	0.000409	0.000915	0.002316	0.00218	0.002657	0.003181	0.002484	0.001638	0.000599	0.000609	0.000968	0.002799	0	0.00625	0.024465	0.022222
A(701)			0.000445	0	5.7e-05	0.000189	0.002588	0.004264	0	0.000409	0.000538	0.000571	0.000651	0.000639	0.000952	0.001832	0.005307	0.023158	0.037139	0.01403	0.009795	0	0	0.003058	0.008889
V(3)			0.00089	0	0	0.000252	0	0	0.000253	0.005925	0.003927	0.001774	0.002781	0.002197	0.001774	0.002391	0.0019	0.001198	0.000304	0	0.004664	0.012158	0.0125	0	0
V(1228)			0.00089	0	0.00017	0.000252	0	0.002714	0.000253	0.000715	0.00113	0.001564	0.001328	0.002581	0.003462	0.003322	0.002228	0.004192	0.00274	0.000484	0.002332	0	0	0.006116	0.002222
G(639)			0.000445	0	0	0.000252	0	0.000129	0	0	0.002851	0.003007	0.001754	0.001329	0.004955	0.001521	0.002031	0.0002	0.000304	0	0	0	0	0.003058	0.013333
G(75)			0	0	0.000567	0.000692	0.003667	0.000517	0.001517	0.000715	0.000592	0.000872	0.002104	0.001661	0.00264	0.003726	0.002686	0.002995	0.004566	0.009676	0.005597	0.006079	0	0	0.011111
S(929)			0.008897	0	0.000227	0.000252	0	0.000129	0	0.000306	0.000377	0.005954	0.004685	0.001559	0.001558	0.000652	0.000262	0	0.000304	0	0	0.00304	0	0	0.002222
T(22)			0.001335	0	0.000397	0.000252	0.000647	0	0.000506	0.000613	0.001076	0.000782	0.001228	0.003066	0.003138	0.003353	0.003014	0.001797	0.000609	0.001451	0.001866	0.00304	0.00625	0	0
G(261)			0.00089	0	0.00034	0.00044	0.000216	0.000517	0.000253	0.002963	0.011082	0.003037	0.002205	0.000997	0.000541	0.000683	0.000721	0.0002	0.000304	0	0	0	0.0125	0.006116	0.022222
A(27)			0.001335	0	0.001303	0.001258	0.000647	0.000905	0.002275	0.001839	0.002475	0.001263	0.001603	0.001431	0.00158	0.001242	0.002621	0.004392	0.003653	0.006773	0.023321	0.00304	0	0.015291	0.002222
A(653)			0.00089	0	0.000283	0.000314	0	0.000129	0.000253	0.000102	0.000161	0.00012	0.000551	0.000741	0.002185	0.006148	0.008059	0.00579	0.00274	0	0.000466	0.009119	0	0.003058	0.013333
D(253)			0.00089	0	5.7e-05	0.000189	0.000431	0.000258	0.000253	0.000102	0.000269	0.000932	0.000802	0.001993	0.001753	0.002049	0.002752	0.014973	0.026788	0.010643	0.000466	0	0.00625	0	0.022222
A(520)			0	0	0.000113	0.000252	0.000647	0.002326	0.006067	0.0095	0.004788	0.000722	0.001077	0.001124	0.001168	0.001739	0.004259	0.000399	0.000304	0.006773	0	0.006079	0	0.003058	0.008889

## Sheet: North America
	2019-11-30	2019-12-31	2020-01-31	2020-02-29	2020-03-31	2020-04-30	2020-05-31	2020-06-30	2020-07-31	2020-08-31	2020-09-30	2020-10-31	2020-11-30	2020-12-31	2021-01-31	2021-02-28	2021-03-31	2021-04-30	2021-05-31	2021-06-30	2021-07-31	2021-08-31	2021-09-30	2021-10-31	2021-11-30
D(614)			0.938303	0.123967	0.756268	0.898448	0.962797	0.989686	0.998207	0.998851	0.999086	0.999737	0.99952	0.999361	0.998459	0.99799	0.997825	0.996609	0.998325	0.999108	0.997232	0.967053	0.998844	0.997066	0.990925
E(484)			0	0	0.000264	0.000246	0.00136	0.000298	0.000468	0.00046	0.000711	0.001444	0.002434	0.005877	0.014993	0.051787	0.191005	0.472274	0.637116	0.726533	0.701499	0.498475	0.028332	0.010269	0.002443
L(18)			0.017995	0	0.00132	0.000308	0.000389	0.007042	0.007015	0.0131	0.093429	0.128685	0.085537	0.09418	0.039662	0.040441	0.087654	0.291027	0.532526	0.726756	0.762399	0.546675	0.030356	0.007824	0.002443
P(681)			0.030848	0	0.000528	0.001047	0.001846	0.004661	0.005223	0.02735	0.023967	0.027378	0.030062	0.050565	0.078529	0.138655	0.181042	0.160373	0.139486	0.180156	0.266897	0.492373	0.949118	0.984352	0.984991
L(452)			0.002571	0	0	0.000308	9.7e-05	9.9e-05	0.000857	0.00023	0.000508	0.002167	0.009332	0.062395	0.137392	0.123934	0.187506	0.121763	0.059404	0.044705	0.102653	0.319707	0.944782	0.976039	0.967888
N(501)			0	0	0	0.000554	0.000777	9.9e-05	0.000546	0.002183	0.00325	0.010768	0.009775	0.011012	0.015258	0.029788	0.0906	0.288873	0.502944	0.644593	0.663206	0.47468	0.026597	0.011736	0.000698
L(5)			0.048843	0.008264	0.005608	0.010285	0.01185	0.009918	0.011303	0.018616	0.014421	0.023636	0.021615	0.025014	0.032687	0.076329	0.187308	0.328743	0.276531	0.150948	0.068973	0.025015	0.006938	0.003423	0.008726
D(138)			0.002571	0	0.000396	0.002155	0.001554	0.000694	0.002027	0.004022	0.004062	0.011358	0.013389	0.026879	0.019848	0.014744	0.068261	0.268526	0.491025	0.624415	0.620761	0.459426	0.057242	0.038142	0.085864
T(20)			0.005141	0	0.000264	0.000801	0.001263	0.002479	0.001169	0.008963	0.004671	0.016742	0.013758	0.019495	0.022896	0.016893	0.068301	0.269626	0.493083	0.630992	0.610842	0.441123	0.02255	0.006846	0.001396
P(26)			0	0	0.000132	0.00037	0.000874	0.001091	0.004209	0.001954	0.002945	0.003151	0.006898	0.015944	0.019765	0.018487	0.075675	0.271642	0.494423	0.633668	0.620761	0.442343	0.021972	0.006846	0.002094
T(1027)			0	0	6.6e-05	0.000677	0.000194	0.000198	0.000156	0.000575	0.000102	0.000394	0.000369	0.00069	0.001756	0.005084	0.066344	0.278058	0.519793	0.723523	0.760784	0.541184	0.028621	0.007335	0.002094
T(95)			0.005141	0	0.000264	0.000801	0.002234	0.001388	0.001559	0.002183	0.001625	0.001904	0.00284	0.005468	0.014032	0.054491	0.175882	0.334701	0.298741	0.241806	0.241753	0.167785	0.040185	0.039609	0.062129
V(1176)			0	0	0.000264	0.000185	0.000777	0.003868	0.002884	0.002413	0.003047	0.002626	0.002951	0.003986	0.008714	0.017008	0.073026	0.271917	0.490403	0.631327	0.620992	0.439902	0.021683	0.006846	0
H(655)			0	0	0.000396	0.000431	0.000777	0.000595	0.001013	0.001724	0.00325	0.009914	0.002508	0.002555	0.003148	0.005315	0.064209	0.268113	0.491216	0.63456	0.631834	0.456986	0.026019	0.008313	0.001396
R(190)			0	0	0	0.00037	0.000291	0.000198	0.000546	0.00023	0.000305	0	0.000184	0.000639	0.001872	0.004622	0.066541	0.269167	0.494184	0.642252	0.658824	0.453325	0.024574	0.006357	0.001047
K(417)			0	0	0	0.000185	9.7e-05	0	0	0	0	0	0.000111	7.7e-05	0.000696	0.003443	0.062252	0.267082	0.489876	0.613824	0.625375	0.447224	0.030356	0.012225	0.004188
D(253)			0.007712	0	6.6e-05	0.003202	0.040699	0.015174	0.007093	0.018731	0.00132	0.002429	0.00332	0.003449	0.010338	0.049546	0.166275	0.318478	0.269207	0.14437	0.064129	0.020744	0.004915	0	0
W(152)			0.002571	0	6.6e-05	0.000924	0.000874	0.000694	0.001325	0.001609	0.00132	0.00348	0.010328	0.061296	0.135321	0.12405	0.187447	0.116081	0.055287	0.025864	0.047982	0.039048	0.052038	0.033252	0.085864
S(13)			0.002571	0	6.6e-05	0.000308	9.7e-05	9.9e-05	0.001403	0	0.000508	0.002167	0.009664	0.059533	0.132107	0.117764	0.173629	0.106182	0.049016	0.013266	0.005075	0.011592	0.01619	0.000978	0.000698
T(478)			0	0	0	0.000123	0	0	0.001247	0.000345	0.000102	0.000197	0.002139	0.006643	0.024934	0.073302	0.118276	0.109505	0.093629	0.072241	0.059054	0.291031	0.927436	0.975061	0.97801
T(732)			0.020566	0	6.6e-05	0.000554	0.003788	0.011901	0.008263	0.011492	0.010765	0.01799	0.017779	0.025321	0.042081	0.08756	0.127666	0.114408	0.095161	0.064994	0.014994	0.006101	0.002891	0	0.000349
A(701)			0	0	0.000198	0.000431	0.000777	0.000992	0.002261	0.000804	0.00325	0.002167	0.002213	0.0035	0.008466	0.037321	0.118256	0.218001	0.16385	0.092642	0.045905	0.012813	0.002891	0.003912	0.006283
S(477)			0.012853	0	0.000132	0.00037	9.7e-05	0.000198	0.000312	0.002413	0.003961	0.00906	0.014828	0.027007	0.030335	0.030851	0.066403	0.135099	0.139055	0.07748	0.040369	0.027456	0.006071	0.001956	0.007679
Q(677)			0.020566	0.008264	0.000594	0.00234	0.001166	0.002281	0.001715	0.003907	0.012593	0.017464	0.029139	0.055164	0.070643	0.086798	0.063517	0.023372	0.010196	0.00379	0.005075	0.004881	0.002024	0.001467	0.003839
A(222)			0.017995	0	0.000462	0.001047	0.001554	0.001388	0.001793	0.009998	0.107038	0.138993	0.07923	0.089146	0.031312	0.023271	0.007967	0.004147	0.004021	0.004348	0.007843	0.015863	0.024284	0.015159	0.014311
Q(957)			0.002571	0	0	0	9.7e-05	0	0	0.000115	0	0.000131	0.000406	0.000204	0.002618	0.01234	0.04703	0.099973	0.105452	0.052174	0.018454	0.005491	0.001156	0	0.000349
D(950)			0	0	6.6e-05	0	0.000389	9.9e-05	0.002494	0.000804	0.000508	0.000131	0.000111	0.000179	0.000182	0.000462	0.001028	0.001581	0.003351	0.017614	0.070127	0.321538	0.934663	0.98044	0.985689
Q(675)			0	0	0.000528	0.000739	0.004565	0.007537	0.006548	0.004137	0.004367	0.005384	0.011398	0.020517	0.027684	0.033993	0.037976	0.032537	0.020487	0.012709	0.008535	0.008542	0.002024	0.006846	0.01082
A(688)			0	0	0.00033	0.000308	0.000583	0.004066	0.005924	0.003447	0.002844	0.001773	0.002914	0.003194	0.00444	0.003166	0.009291	0.03948	0.063089	0.110814	0.146482	0.106772	0.008962	0.000489	0.002443
T(19)			0	0	6.6e-05	0.000123	0.001554	0.000298	0.00265	0.00046	0.000508	0.00046	0.000516	0.000562	0.001011	0.000786	0.000929	0.000733	0.001388	0.010591	0.038754	0.205003	0.493206	0.445966	0.528447
E(780)			0	0	0.000132	6.2e-05	0	0.00119	0.000624	0.002643	0.04052	0.009257	0.017189	0.022331	0.014645	0.020636	0.01451	0.007172	0.006079	0.000557	0.000231	0.00061	0	0.000978	0.000349
S(494)			0	0	0.000264	0.000123	0.00068	0.000694	0.000312	0.001954	0.001422	0.001247	0.002693	0.004267	0.010868	0.018441	0.032302	0.025938	0.009526	0.001115	0.002307	0.004271	0.002891	0.000489	0.000349
R(158)			0	0	6.6e-05	0.000308	9.7e-05	9.9e-05	0.000468	0.00023	0	6.6e-05	0.000111	0.000511	0.001077	0.001456	0.005278	0.010999	0.029917	0.097659	0.184775	0.131178	0.0451	0.031296	0.086213
M(153)			0.002571	0	0.000528	0.000493	0.000583	0.001686	0.003508	0.012296	0.002031	0.00348	0.004648	0.006771	0.011614	0.010422	0.010299	0.008341	0.008185	0.018506	0.056517	0.040879	0.036716	0.031785	0.085864
G(769)			0.007712	0	0.000396	0.000801	0.002137	0.000793	0.001637	0.002758	0.001828	0.004333	0.007303	0.009224	0.012177	0.01271	0.016803	0.009257	0.002681	0.001561	0.000923	0.003051	0.002602	0	0.000349
G(142)			0.002571	0	0.000264	0.000862	0.000777	0.00119	0.000779	0.00046	0	0.000328	0.000553	0.002197	0.003579	0.006332	0.010359	0.011251	0.007515	0.016388	0.051672	0.066504	0.079792	0.054279	0.199302
T(716)			0.002571	0	0.000198	0.000246	9.7e-05	0.000298	0.00039	0.000689	0.000203	0.00046	0.000516	0.003143	0.005252	0.012294	0.019037	0.015558	0.008855	0.002899	0.009458	0	0.000289	0	0.002094
G(75)			0	0	0.000396	0.000985	0.001554	0.000694	0.004053	0.003103	0.00264	0.002101	0.018369	0.011063	0.01168	0.006702	0.005476	0.004537	0.004787	0.013155	0.007843	0.007932	0.001446	0.000489	0.001047
S(735)			0	0	6.6e-05	0	0	0	0.000312	0	0.000102	0	7.4e-05	0.000204	0.000381	0.000994	0.003143	0.009692	0.026231	0.086845	0.138178	0.106162	0.010697	0.010758	0.005934
Q(173)			0	0	0.000198	0.000308	9.7e-05	0.000198	0.000312	0.000804	0.002844	0.013394	0.024271	0.007614	0.0056	0.004992	0.006385	0.004239	0.005313	0.013155	0.040369	0.014643	0.004626	0.006357	0.002443
N(440)			0	0	6.6e-05	0	0	0	0.000156	0.000115	0	0	7.4e-05	0.000409	0.000596	0.000878	0.003934	0.009853	0.023264	0.072018	0.119031	0.090909	0.008095	0	0.000349
W(258)			0	0	0.000528	0.000739	0.00068	0.000793	0.000234	0	0.000102	0.000328	0.001217	0.003373	0.010205	0.011046	0.01285	0.008066	0.005744	0.002341	0.00692	0.012813	0.006938	0.003912	0.001745
A(520)			0.010283	0	0.000462	0.000308	0.000874	0.010513	0.004131	0.002413	0.004671	0.002889	0.006049	0.006796	0.010752	0.012017	0.00858	0.001856	0.000718	0.001003	0.000692	0.002441	0.000867	0.000978	0.001047
E(154)			0	0	0.000132	0.000246	0.000194	0.000198	0.000546	0.00046	0	0	3.7e-05	0.000588	0.001458	0.002126	0.010517	0.012557	0.007946	0.013043	0.044983	0.026236	0.035849	0.031296	0.085864
S(1252)			0	0	0	0.000123	0.00068	0.000893	0.000156	0.00046	0.000711	0.000263	0.000184	0.003398	0.005368	0.00416	0.005436	0.015215	0.016371	0.020847	0.011765	0.014033	0.000289	0.000489	0.000698
F(157)			0	0.008264	0.000198	0.000246	0.000194	0.000496	0.00039	0.000804	0.000203	0.00046	0.001549	0.001891	0.002982	0.002311	0.006286	0.006072	0.006223	0.015942	0.055825	0.044539	0.039029	0.031296	0.085864
R(357)			0	0	0.000132	0.000308	0.000971	0.002281	0.000857	0.007814	0.002336	0.011555	0.007746	0.011702	0.012608	0.005015	0.000751	0.000115	4.8e-05	0.000334	0.000461	0.003661	0.002602	0	0
D(215)			0	0	0.000132	0.000677	0.001846	0.001388	0.002572	0.002758	0.00782	0.005778	0.003504	0.006081	0.005136	0.003859	0.005001	0.004285	0.006701	0.014381	0.041753	0.015863	0.004047	0.001956	0.002792
S(939)			0.002571	0	0.00099	0.001786	0.003594	0.00119	0.002183	0.002068	0.002336	0.002429	0.003209	0.010348	0.005948	0.005061	0.003717	0.004354	0.00876	0.006577	0.014302	0.018914	0.002313	0.001467	0.002443
D(178)			0	0	6.6e-05	0.000308	9.7e-05	0.000298	0.001715	0.002988	0.001828	0.007353	0.005828	0.003807	0.004357	0.0055	0.005891	0.005041	0.005505	0.013043	0.041292	0.014643	0.004337	0.000489	0.003141
V(1228)			0.005141	0	6.6e-05	0.000431	0.003497	0.001884	0.002027	0.002758	0.001726	0.001576	0.003947	0.00534	0.00825	0.009267	0.008402	0.002383	0.001388	0.001672	0.00323	0	0.001156	0.000489	0.000698
H(49)			0.017995	0	0.000858	0.000616	0.001166	0.00843	0.025255	0.00632	0.007921	0.005646	0.005385	0.00442	0.004606	0.00409	0.003677	0.003872	0.00201	0.001115	0.000692	0	0.000867	0.000489	0.001396
P(812)			0	0	0.000462	0.001293	0.000874	0.000595	0.000546	0.001264	0.005382	0.003545	0.003357	0.006924	0.005335	0.005731	0.004349	0.00566	0.005983	0.00524	0.000231	0	0.000867	0.002934	0.004887
D(936)			0.005141	0	0.001847	0.007636	0.003497	0.001587	0.001169	0.002988	0.001828	0.002429	0.003689	0.006388	0.005799	0.003836	0.002135	0.002864	0.007755	0.008696	0.012457	0.021965	0.001735	0.000978	0.000698
H(146)			0.002571	0	0.000594	0.002463	0.000874	9.9e-05	0.000935	0.001034	0.001422	0.000657	0.000516	0.001737	0.001839	0.001733	0.003756	0.004102	0.006175	0.014047	0.046828	0.027456	0.035849	0.031296	0.085515
Y(144)			0	0	0	0.000308	0.001068	9.9e-05	0.000546	0.00046	0	0.000131	7.4e-05	0.000639	0.001011	0.001179	0.003499	0.003689	0.006893	0.019844	0.069666	0.04637	0.037872	0.031785	0.085515
Y(145)			0	0	0.001715	0.000554	9.7e-05	9.9e-05	0.000312	0.000345	0.000305	6.6e-05	0	0.000818	0.001093	0.001248	0.003539	0.003643	0.006606	0.017726	0.066436	0.04637	0.037583	0.032274	0.085515
V(143)			0	0	6.6e-05	0.00037	0.000389	0.000397	0.001169	0.00046	0.000305	0.000591	0.00048	0.001533	0.002203	0.001826	0.00429	0.003804	0.005457	0.013043	0.044752	0.026236	0.036427	0.031296	0.085515
E(180)			0.002571	0	0	0.000185	0.000194	0.001686	0.001013	0.00046	0.000406	0.000263	0.001143	0.002581	0.003827	0.006008	0.005772	0.004124	0.005361	0.012821	0.040369	0.014033	0.003469	0.000489	0.002094
A(845)			0	0	0.000792	0.003387	0.000874	0.000496	0.001871	0.003103	0.000711	0.003151	0.003135	0.003654	0.00381	0.003767	0.004567	0.006485	0.005409	0.004348	0.007843	0.009762	0.004626	0.000978	0.000698
S(151)			0	0	0.000132	0.000308	0.000194	0.001488	0.001169	0.001149	0.000609	0	7.4e-05	0.000894	0.001176	0.001502	0.004033	0.00417	0.005457	0.013601	0.044983	0.025625	0.035849	0.031296	0.085864
E(1111)			0	0	0	6.2e-05	0	0.001686	0.000702	0.000689	0.000406	0.000525	0.000627	0.000818	0.001342	0.00305	0.010695	0.012305	0.005936	0.000223	0	0.00061	0.000289	0.001467	0.000349
L(141)			0	0	0	0.000185	9.7e-05	0.000496	0.000468	0.00023	0.000102	0.000197	0.002619	0.001201	0.001292	0.001317	0.003479	0.003575	0.005313	0.012821	0.044752	0.026236	0.036427	0.031296	0.085515
N(148)			0	0	0.000264	0.000308	9.7e-05	0.000198	0.000312	0.00023	0	0	0.000111	0.000639	0.00106	0.001502	0.004468	0.003964	0.005936	0.013824	0.044983	0.026236	0.036427	0.031785	0.085864
S(155)			0	0	0	0.000185	0.000194	0.000298	0.00039	0.000345	0	0	0.00048	0.000869	0.001541	0.001502	0.003657	0.003804	0.005457	0.013043	0.044752	0.025625	0.035849	0.031296	0.085515
M(177)			0	0	0.000132	0.00037	0.000486	9.9e-05	0.000702	0.000689	0.000406	0.000657	0.001439	0.002121	0.002651	0.004067	0.00516	0.004514	0.005888	0.013712	0.041061	0.014643	0.004047	0.002934	0.003141
K(150)			0	0	0	0.000185	9.7e-05	0.000198	0.000312	0.00023	0.000102	0.000131	0	0.000485	0.000911	0.001248	0.00344	0.003689	0.005696	0.012821	0.044752	0.025625	0.035849	0.031296	0.085515
N(149)			0	0	0.000132	0.000677	9.7e-05	9.9e-05	0.00039	0.000345	0.000102	0	0	0.000485	0.000944	0.001132	0.00342	0.00346	0.005218	0.012821	0.044521	0.025625	0.035849	0.031296	0.085515
L(54)			0	0	0.000528	0.001971	0.00136	0.01329	0.005378	0.003103	0.004468	0.006303	0.004869	0.0058	0.003628	0.001687	0.001838	0.001925	0.003064	0.001449	0.000461	0.00183	0.001446	0.000489	0.001396
D(80)			0	0	0.000264	0.000616	0.00068	0.001785	0.001481	0.001264	0.006398	0.007813	0.006971	0.004701	0.003827	0.002727	0.00346	0.002521	0.002154	0.001672	0.001615	0	0.001735	0.000978	0.001396
Q(613)			0	0	0.000132	0	0.000389	0.000496	0.001169	0.00046	0.000609	0.000985	0.002287	0.003092	0.005749	0.005246	0.004349	0.002841	0.001819	0.002564	0.007843	0.007932	0.008962	0.002445	0.010122
A(1078)			0	0	0.001254	0.000308	0.001457	0.000793	0.001637	0.003562	0.001726	0.003217	0.003578	0.004497	0.004423	0.005107	0.003993	0.002773	0.001867	0.001003	0.000923	0.003051	0.000578	0.001467	0.002094
D(1260)			0	0	6.6e-05	0.000123	0.000194	0.000198	0.000624	0.00046	0.004468	0.000328	0.000516	0.00046	0.000961	0.000947	0.004922	0.011549	0.009621	0.003233	0.01015	0.018304	0.009829	0.000978	0.000349
Q(183)			0	0	0	0.00037	0.000291	0.000198	0.00039	0.000919	0.000203	0.000525	0.000111	0.00069	0.001557	0.001479	0.003618	0.003643	0.006127	0.021405	0.069666	0.026846	0.003758	0.000489	0.002094
E(1258)			0	0	6.6e-05	0.000554	0.000583	0.000397	0.002494	0.005056	0.000102	0.000131	0.000258	0.000102	0.000464	0.000139	0.003677	0.005614	0.009238	0.039242	0.025606	0.00183	0	0.000489	0
A(163)			0	0	0	0.000308	0.000389	0.000198	0.000546	0.000345	0.000102	6.6e-05	0.000221	0.000996	0.002535	0.004206	0.004092	0.003872	0.005553	0.012932	0.040369	0.014033	0.003469	0	0.000698
T(572)			0	0	0.00099	0.000801	0.003303	0.002083	0.001637	0.003333	0.001117	0.001838	0.002766	0.004344	0.005152	0.003674	0.00255	0.000894	0.00158	0.00078	0.003691	0.011592	0.018792	0.007824	0.002792
D(198)			0	0	0	0.000246	9.7e-05	0.000198	0.00039	0.000345	0.000203	0.000131	0.000443	0.001737	0.002816	0.002519	0.004487	0.003781	0.005505	0.013043	0.0406	0.014033	0.003469	0	0.000698
S(640)			0	0	0	0.000246	0.001457	0.00357	0.003508	0.001034	0.001422	0.001904	0.002656	0.004063	0.003347	0.003397	0.003025	0.002246	0.001197	0.006689	0.011534	0.014643	0.017346	0.002445	0.000698
N(211)			0	0	0	0.000185	0.000194	0.000198	0.000312	0.00023	0	0	0.000221	0.00069	0.001375	0.00379	0.005515	0.003827	0.005265	0.012821	0.040138	0.014643	0.003758	0.000978	0.000698
M(1237)			0	0	0.001913	0.025557	0.005731	0.000893	0.001091	0.001609	0.000914	0.001247	0.002213	0.001661	0.001889	0.002565	0.003282	0.000825	0.000766	0.00078	0.001153	0.003051	0.001156	0.000978	0.001047
A(27)			0	0	0.001452	0.000924	0.001166	0.000992	0.002105	0.000919	0.001422	0.004859	0.001623	0.00327	0.002402	0.002704	0.004468	0.003964	0.003351	0.002676	0.001615	0.00122	0.001156	0.001956	0.002792
R(214)			0	0	0.000132	0.000431	0.000486	0.00119	0.000857	0.001379	0.000305	0.000394	0.000811	0.001226	0.001491	0.001641	0.003894	0.003597	0.006462	0.013378	0.041984	0.016473	0.004047	0	0.002443
I(210)			0	0	6.6e-05	0.000246	9.7e-05	0.000198	0.000312	0.00046	0	0	0.000443	0.000613	0.001226	0.001317	0.003894	0.005156	0.008233	0.014493	0.041061	0.014033	0.003469	0	0.000698
N(679)			0	0	0.000132	0	0	0	0.000546	0	0.000406	0.001182	0.001033	0.00253	0.004175	0.006216	0.006207	0.001948	0.000287	0	0.001845	0.013423	0.001156	0.001467	0.000349
S(12)			0	0	0.000132	6.2e-05	0.000486	0.000595	0.000935	0.000689	0.00132	0.001379	0.000959	0.002555	0.003015	0.003651	0.002847	0.00566	0.005744	0.004571	0.001615	0.00061	0.000578	0	0.001396
G(1219)			0.002571	0	0.006466	0.007082	0.009616	0.002182	0.000857	0.001149	0.001219	0.000985	0.002029	0.002785	0.001657	0.001895	0.002847	0.002704	0.002202	0.00223	0.001153	0.00183	0.002024	0.003423	0.005585
V(213)			0	0	6.6e-05	0.000677	0.001068	9.9e-05	0.000546	0.000919	0.000102	0.000328	0.000221	0.001022	0.001127	0.001779	0.003815	0.004033	0.005792	0.014047	0.0406	0.014643	0.003469	0.000489	0.001745
Q(1071)			0	0	0	6.2e-05	9.7e-05	0.000198	0	0.00023	0	0.000131	0.001143	0.001763	0.002767	0.00208	0.005555	0.007699	0.002202	0.000223	0	0.00183	0.000289	0	0.000349
T(859)			0.002571	0	0.000594	0.002463	9.7e-05	0.000496	0.001403	0.000919	0.000406	0.000919	0.003061	0.002913	0.003429	0.003374	0.003974	0.002268	0.001292	0.002007	0.002307	0.004271	0.002313	0.00489	0.001745
T(29)			0	0	0.000924	0.002402	0.001263	0.000595	0.000468	0.000919	0.000914	0.00105	0.001955	0.00396	0.005285	0.003559	0.001542	0.000825	0.001292	0.00223	0.009227	0.015253	0.002891	0.000489	0.001047
E(156)			0	0	0	0.000185	0.000583	0.000198	0.000702	0.002643	0.000102	6.6e-05	0.000258	0.000971	0.001607	0.001618	0.003598	0.003506	0.005313	0.012821	0.0406	0.014033	0.003469	0	0.000698
L(189)			0	0	0	0.000185	0.000194	9.9e-05	0.00039	0.00023	0.000102	0.00046	0.000111	0.000767	0.001574	0.002057	0.003717	0.003575	0.005457	0.013266	0.041061	0.014643	0.003469	0	0.000698
P(174)			0	0	0	0.000185	9.7e-05	0.000298	0.000312	0.000689	0	6.6e-05	3.7e-05	0.000741	0.001342	0.001456	0.003894	0.003804	0.005505	0.013043	0.040138	0.014033	0.003758	0.002934	0.002443
L(179)			0	0	0	0.000246	9.7e-05	0.000397	0.000624	0.00023	0	0	0	0.000562	0.001309	0.001525	0.003894	0.003987	0.005409	0.012932	0.040138	0.014033	0.003758	0	0.000698
R(21)			0	0	0.000594	0.007452	0.009713	0.005851	0.006314	0.002298	0.001422	0.000919	0.001623	0.001507	0.001359	0.000878	0.000593	0.00126	0.009909	0.003344	0.004383	0	0.001156	0.001956	0.000698
A(653)			0	0	0.000264	0.000246	0.000291	0.000298	0.000779	0.000115	0.000508	0	0.000332	0.000409	0.001127	0.002588	0.006464	0.005683	0.004595	0.003902	0.004152	0.006101	0.002891	0.002445	0.001047
I(197)			0	0	0.000132	0.000246	0.000194	9.9e-05	0.00039	0.00023	0	6.6e-05	0.000184	0.001124	0.001392	0.001548	0.003578	0.003483	0.005218	0.012932	0.040138	0.014033	0.003469	0.000489	0.000698
L(176)			0	0	0.000132	0.000308	0.000291	0.000893	0.00039	0.000689	0.000508	0.001904	0.003836	0.00327	0.003877	0.002912	0.001878	0.001879	0.001627	0.003902	0.009689	0.010372	0.003758	0.000978	0.000698
G(184)			0	0	0.000132	0.001724	0.000389	9.9e-05	0.000468	0.000804	0.000102	6.6e-05	7.4e-05	0.000562	0.001077	0.001271	0.003539	0.003506	0.005409	0.013155	0.040138	0.014033	0.003469	0	0.000698

## Sheet: Occeania
	2019-11-30	2019-12-31	2020-01-31	2020-02-29	2020-03-31	2020-04-30	2020-05-31	2020-06-30	2020-07-31	2020-08-31	2020-09-30	2020-10-31	2020-11-30	2020-12-31	2021-01-31	2021-02-28	2021-03-31	2021-04-30	2021-05-31	2021-06-30	2021-07-31	2021-08-31	2021-09-30	2021-10-31	2021-11-30
D(614)			0.6	0	0.505507	0.72104	0.90625	0.980149	0.999152	0.999169	0.995763	1	1	1	0.991935	1	0.969231	1	0.988889	0.886364	0.666667
S(477)			0.366667	0	0.000551	0.002364	0.078125	0.73201	0.975191	0.974668	0.875	0.505208	0.079208	0.007752	0.016129	0.206897	0.046154	0	0	0	0
P(681)			0	0	0	0	0	0	0.000212	0	0	0	0.019802	0.027132	0.096774	0.068966	0.630769	0.944444	0.966667	0.863636	0.666667
V(1068)			0	0	0	0	0	0	0.007846	0.039452	0.122881	0.151042	0.029703	0.003876	0	0	0	0	0	0	0
N(439)			0	0	0	0	0	0	0	0	0	0.005208	0	0	0.056452	0.068966	0.738462	0.655556	0.622222	0.613636	0.666667
N(501)			0.066667	0	0.000551	0	0	0.044665	0.000636	0	0	0	0.009901	0.55814	0.153226	0	0.076923	0.044444	0	0	0
T(632)			0	0	0	0.002364	0	0.002481	0.022053	0.017442	0.002119	0	0	0	0	0	0	0	0	0	0
L(452)			0	0	0	0	0	0	0	0	0	0	0	0.034884	0.137097	0.241379	0.046154	0.244444	0.322222	0.25	0
S(698)			0	0	0	0	0	0	0.005089	0.020764	0.012712	0	0	0	0	0	0	0	0	0	0
A(930)			0	0	0	0	0	0	0.00106	0.030731	0	0	0	0	0	0	0	0	0	0	0
E(484)			0	0	0	0	0	0	0	0	0	0	0	0	0.024194	0.103448	0.092308	0.277778	0.322222	0.25	0
E(154)			0	0	0	0	0	0	0	0	0	0	0	0	0.008065	0	0.030769	0.277778	0.344444	0.25	0
Q(1071)			0	0	0	0	0	0	0	0	0	0	0	0	0.008065	0	0.030769	0.244444	0.322222	0.25	0
G(1124)			0	0	0.011564	0.002364	0	0	0.00827	0.001246	0	0	0	0	0	0	0	0	0	0	0
G(142)			0	0	0	0	0	0	0	0	0	0	0	0	0.008065	0	0.030769	0.211111	0.322222	0.25	0
A(222)			0.033333	0	0.001652	0.004728	0	0	0.000848	0.006229	0.002119	0.041667	0.079208	0.03876	0.056452	0.068966	0.015385	0	0	0	0
H(1101)			0	0	0	0	0	0	0	0	0.008475	0	0	0	0.008065	0	0.015385	0.144444	0.322222	0.25	0
L(5)			0	0	0.006057	0.002364	0	0.002481	0.002757	0.004983	0.006356	0.041667	0	0	0	0	0	0	0.011111	0.022727	0
E(1144)			0	0	0	0	0	0	0.000636	0.017442	0.008475	0	0	0	0	0	0	0	0	0	0
T(778)			0	0	0	0	0	0	0.007422	0.004568	0.002119	0	0	0	0	0	0	0	0	0	0
G(35)			0	0	0	0	0	0	0.00106	0.008306	0.038136	0	0	0	0	0	0	0	0	0	0
A(626)			0	0	0.017621	0.01182	0	0	0.000636	0	0	0	0	0	0	0	0	0	0	0	0
S(254)			0	0	0	0	0	0.002481	0.004877	0.004983	0	0	0	0.003876	0	0	0.015385	0	0	0	0
W(152)			0	0	0	0	0	0	0	0	0	0	0	0.027132	0.137097	0.206897	0.076923	0.033333	0	0	0
V(320)			0.033333	0	0	0	0	0	0	0.012874	0.008475	0	0	0	0	0	0	0	0	0	0
S(13)			0	0	0	0	0	0	0	0.000415	0	0	0	0.027132	0.120968	0.172414	0	0	0	0	0
L(18)			0	0	0.001652	0	0	0	0.000212	0	0	0.010417	0.029703	0.015504	0.048387	0	0.061538	0.033333	0.011111	0	0
D(80)			0	0	0	0	0	0	0.000212	0.009136	0.006356	0	0	0.003876	0	0	0	0	0	0	0
S(12)			0	0	0.001101	0.002364	0	0.002481	0	0.001246	0.029661	0	0	0.007752	0.008065	0.068966	0	0	0	0	0
Q(677)			0	0	0.000551	0	0	0.004963	0.000424	0	0.002119	0	0	0.023256	0.048387	0.103448	0.015385	0	0.011111	0.045455	0
Q(675)			0	0	0.000551	0	0	0.002481	0	0	0	0.005208	0.059406	0.01938	0.040323	0.103448	0.046154	0	0	0	0
P(1263)			0	0	0.007709	0.023641	0	0	0.000212	0	0	0	0	0	0	0	0	0	0	0	0
T(1117)			0	0	0	0	0	0	0.000636	0.006229	0	0.020833	0	0.007752	0	0	0	0	0	0	0
D(138)			0	0	0	0.007092	0	0	0.000212	0	0	0.010417	0.009901	0.007752	0.008065	0.172414	0.092308	0.033333	0	0	0
A(701)			0	0	0	0	0	0	0	0	0	0.083333	0	0.01938	0	0.034483	0	0.011111	0	0	0
V(1176)			0	0	0.001652	0.002364	0	0.004963	0.00106	0	0	0	0	0	0	0.068966	0.061538	0.033333	0	0	0
E(654)			0	0	0	0	0	0	0	0.000831	0.025424	0	0.039604	0	0	0	0	0.011111	0	0	0
L(822)			0	0	0	0	0	0	0.000212	0.006229	0.004237	0	0	0	0	0	0	0	0	0	0
G(261)			0	0	0	0.002364	0	0	0	0	0.002119	0.083333	0	0	0	0	0	0	0	0	0
M(1229)			0	0	0	0	0	0	0.003181	0	0.002119	0	0	0	0.016129	0	0	0	0	0	0
L(455)			0	0	0	0	0	0	0.000212	0.004983	0.008475	0	0	0	0	0	0	0	0	0	0
T(95)			0	0	0	0	0	0	0	0.000415	0	0	0.009901	0.011628	0.016129	0	0.015385	0.088889	0	0	0
P(1112)			0	0	0	0	0	0	0.000212	0.005399	0.002119	0	0	0	0	0	0	0	0	0	0
V(1228)			0	0	0	0	0	0	0.000424	0.003322	0	0.020833	0	0	0.008065	0	0	0	0	0	0
A(845)			0.066667	0	0	0	0	0.004963	0.000212	0.000415	0.002119	0	0	0.003876	0.008065	0.103448	0.046154	0	0	0	0
E(583)			0	0	0	0.002364	0	0	0.000848	0.002492	0	0.005208	0	0	0	0	0	0.011111	0.011111	0	0
A(623)			0	0	0.007709	0	0	0	0	0	0	0	0	0	0	0	0	0	0	0	0
F(186)			0	0	0.000551	0.002364	0	0	0	0.000415	0.004237	0.041667	0	0	0	0	0	0	0	0	0
N(1192)			0	0	0	0	0	0	0.000212	0.004568	0	0	0	0	0	0	0	0	0	0	0
H(655)			0	0	0	0.002364	0	0	0.000212	0.000415	0	0	0	0	0	0	0.076923	0.033333	0.011111	0	0
W(258)			0	0	0.000551	0	0	0	0.001272	0	0	0	0	0	0	0.034483	0	0.044444	0	0	0
A(1078)			0	0	0	0	0	0	0.00106	0.000415	0.002119	0	0.009901	0	0.016129	0.034483	0	0	0	0	0
A(522)			0	0	0.001101	0	0	0	0.000212	0	0.002119	0	0	0	0	0.103448	0.061538	0	0	0	0
P(26)			0	0	0	0	0	0	0.000212	0	0	0	0	0.015504	0	0	0.046154	0.033333	0	0	0
V(772)			0	0	0.001652	0.016548	0	0.002481	0	0	0	0	0	0	0	0	0	0	0	0	0
E(619)			0	0	0	0	0	0	0.00106	0.002076	0	0	0	0	0	0	0	0	0	0	0
R(847)			0	0	0	0	0	0	0.001484	0.001246	0	0	0	0	0	0	0	0	0	0	0
A(262)			0.033333	0	0.003855	0	0	0	0	0	0.002119	0	0	0	0.008065	0	0	0	0	0	0
H(69)			0	0	0	0	0	0	0	0.003738	0.002119	0	0	0	0	0	0	0	0	0	0
R(21)			0	0	0.002753	0	0	0.004963	0.000212	0	0.002119	0	0	0	0	0	0	0.011111	0	0	0
P(812)			0	0	0.001101	0.002364	0	0	0	0.001246	0	0	0	0	0.024194	0	0	0	0.011111	0	0
S(98)			0	0	0	0	0	0.004963	0	0.000415	0.002119	0.015625	0.019802	0	0	0	0	0	0	0.022727	0
V(1122)			0	0	0	0	0	0	0.001696	0	0	0.010417	0	0	0	0	0	0	0	0	0
S(50)			0	0	0.003304	0.002364	0	0	0	0.001246	0	0	0	0	0	0	0	0	0	0	0
T(859)			0	0	0	0.016548	0	0	0	0	0	0	0.009901	0.007752	0	0	0	0	0	0	0
T(732)			0	0	0	0	0	0	0	0	0	0	0.009901	0	0.008065	0.034483	0	0.044444	0.022222	0	0
A(688)			0	0	0	0	0	0	0	0	0.006356	0	0	0.015504	0.016129	0	0	0	0	0	0
M(153)			0	0	0	0	0	0.002481	0.000424	0.000415	0	0.005208	0.009901	0.007752	0.008065	0	0	0	0	0	0
H(49)			0	0	0.002753	0.002364	0	0	0	0	0	0	0	0	0.008065	0	0.015385	0.011111	0	0	0
T(274)			0	0	0	0	0	0	0	0	0	0.041667	0	0	0	0	0	0	0	0	0
S(255)			0	0	0.002203	0.002364	0	0	0.000424	0	0	0	0	0.003876	0	0	0	0	0	0	0
S(1097)			0	0	0	0	0	0	0.000424	0.002492	0	0	0	0	0	0	0	0	0	0	0
R(190)			0	0	0	0	0	0	0	0	0	0	0	0.007752	0	0	0.046154	0.033333	0	0	0
D(1146)			0	0	0.002203	0	0	0	0	0	0	0	0	0.011628	0	0	0	0	0	0	0
S(247)			0.033333	0	0	0	0	0.002481	0	0	0	0	0	0	0	0	0	0	0	0.113636	0
D(1163)			0	0	0.002753	0.004728	0	0	0	0	0	0	0	0	0	0	0	0	0	0	0
T(1027)			0	0	0	0	0	0	0	0	0	0	0	0	0.008065	0	0.046154	0.033333	0	0	0
Q(926)			0	0	0	0	0	0	0	0.000415	0.012712	0	0	0	0	0	0	0	0	0	0
N(481)			0	0	0	0	0	0	0	0	0.008475	0.015625	0	0	0	0	0	0	0	0	0
A(831)			0	0	0.003304	0	0	0	0.000212	0	0	0	0	0	0	0	0	0	0	0	0
S(691)			0	0	0	0	0	0	0	0.002492	0	0	0.009901	0	0	0	0	0	0	0	0
T(20)			0	0	0	0	0	0	0	0.000415	0	0	0	0	0	0	0.046154	0.033333	0	0	0
Q(14)			0	0	0.001652	0	0	0	0	0.000831	0.002119	0	0	0	0	0	0	0.011111	0	0	0
T(22)			0	0	0	0	0	0.004963	0	0.000415	0	0	0	0.007752	0	0.068966	0	0	0	0	0
D(808)			0	0	0.000551	0.01182	0	0.002481	0	0	0	0	0	0	0	0	0	0	0	0	0
K(1191)			0	0	0	0	0	0	0	0	0.002119	0	0	0.011628	0	0	0.030769	0	0	0	0
K(417)			0	0	0	0	0	0	0	0	0	0	0	0	0	0	0.046154	0.033333	0	0	0
L(141)			0	0	0	0.002364	0	0	0	0.000415	0	0	0.019802	0	0.016129	0	0	0	0	0	0
L(176)			0	0	0	0	0	0	0	0	0	0	0	0	0.016129	0	0	0.044444	0	0	0
P(631)			0	0	0.000551	0	0	0	0	0	0.002119	0	0.029703	0.003876	0	0	0	0	0	0	0
S(221)			0	0	0.002753	0	0	0	0.000212	0	0	0	0	0	0	0	0	0	0	0	0
R(214)			0	0	0	0	0	0	0	0.001246	0	0	0	0	0.008065	0.034483	0	0.011111	0	0	0
G(485)			0	0	0	0	0.09375	0	0	0	0	0	0	0	0	0	0	0	0	0	0
A(520)			0	0	0.000551	0	0	0	0	0	0	0	0.019802	0	0.008065	0.068966	0	0	0	0	0
A(67)			0	0	0.001101	0	0	0	0.000424	0	0	0	0	0	0	0.034483	0.015385	0	0	0	0
T(478)			0	0	0	0	0	0	0	0	0	0	0	0	0	0	0	0.044444	0.022222	0	0
G(446)			0	0	0.000551	0	0	0	0.000424	0.000415	0.004237	0	0	0	0	0	0	0	0	0	0
A(1020)			0	0	0	0	0	0	0.000212	0	0	0.005208	0.019802	0	0.008065	0	0.015385	0	0	0	0
G(769)			0	0	0.000551	0	0.015625	0	0	0	0	0	0	0	0.016129	0.034483	0	0	0	0	0
V(308)			0	0	0.001101	0	0	0	0.000212	0	0	0	0	0	0	0	0	0.011111	0.011111	0	0

## Sheet: South America
	2019-11-30	2019-12-31	2020-01-31	2020-02-29	2020-03-31	2020-04-30	2020-05-31	2020-06-30	2020-07-31	2020-08-31	2020-09-30	2020-10-31	2020-11-30	2020-12-31	2021-01-31	2021-02-28	2021-03-31	2021-04-30	2021-05-31	2021-06-30	2021-07-31	2021-08-31	2021-09-30	2021-10-31	2021-11-30
D(614)			0.918919	0.777778	0.893443	0.984586	0.997824	0.99016	0.989691	0.986517	0.994203	0.994911	0.992908	0.995021	0.993908	0.988995	0.998728	0.99962	0.996458	1	1	1	0.998668	0.99422	1
V(1176)			0.027027	0	0.118852	0.159923	0.088139	0.182042	0.231959	0.175281	0.265217	0.288804	0.583924	0.571784	0.719306	0.884446	0.931298	0.958887	0.975588	0.986161	0.985478	0.986686	0.943371	0.867052	0.817204
E(484)			0	0	0	0.001927	0.002176	0.00369	0.006443	0.007865	0.008696	0.091603	0.288416	0.443154	0.630272	0.819883	0.905216	0.942948	0.972805	0.990991	0.996263	0.990431	0.956029	0.881503	0.849462
N(501)			0	0	0	0	0	0.00246	0	0.005618	0	0.003817	0.002364	0.078838	0.184161	0.523844	0.833545	0.931689	0.964837	0.984304	0.98772	0.987934	0.954031	0.881503	0.83871
L(18)			0	0	0	0	0.003264	0	0.001289	0.010112	0.010145	0.010178	0.010638	0.091286	0.189316	0.527513	0.829729	0.93093	0.967114	0.983004	0.984196	0.985438	0.942705	0.867052	0.817204
H(655)			0	0	0	0	0	0.00246	0.005155	0.002247	0.001449	0.010178	0.002364	0.089627	0.189784	0.526412	0.832061	0.930424	0.967114	0.982446	0.984303	0.984398	0.939374	0.867052	0.83871
P(26)			0	0	0	0.001927	0	0.00123	0.001289	0.002247	0.005797	0.003817	0.003546	0.078008	0.185098	0.524211	0.829517	0.930044	0.966228	0.982539	0.983983	0.98523	0.942705	0.867052	0.817204
T(1027)			0	0	0	0	0	0	0	0.003371	0	0.002545	0	0.077178	0.186036	0.523111	0.829304	0.930424	0.967999	0.981982	0.983449	0.983358	0.939374	0.867052	0.817204
R(190)			0	0	0	0.000963	0	0	0	0.002247	0	0.003817	0	0.075519	0.182287	0.519076	0.824427	0.921822	0.965469	0.98031	0.983022	0.984398	0.942039	0.867052	0.83871
T(20)			0	0	0	0.000963	0	0	0	0.006742	0.004348	0.005089	0.001182	0.076349	0.179007	0.501467	0.819975	0.922834	0.960789	0.974831	0.978324	0.979821	0.94004	0.872832	0.817204
D(138)			0	0	0	0	0	0.00123	0.001289	0.007865	0.004348	0.015267	0.01182	0.090456	0.19447	0.525679	0.807464	0.857938	0.884771	0.93638	0.920235	0.948825	0.938708	0.869942	0.870968
K(417)			0	0	0	0	0	0.00123	0	0.002247	0	0.002545	0	0.075519	0.180881	0.494864	0.661578	0.818975	0.884265	0.973902	0.981954	0.980029	0.938708	0.867052	0.827957
P(681)			0	0	0	0	0	0.00246	0	0.006742	0.005797	0.006361	0.01182	0.007469	0.010778	0.006603	0.009542	0.013536	0.039717	0.075044	0.134864	0.275432	0.351099	0.294798	0.451613
N(679)			0	0	0	0.000963	0	0.00123	0	0.001124	0.001449	0.002545	0.010638	0.006639	0.008435	0.006236	0.002332	0.004554	0.011763	0.01969	0.038761	0.113168	0.188541	0.216763	0.365591
Q(675)			0	0.111111	0	0.000963	0	0.00246	0.005155	0.013483	0.02029	0.019084	0.021277	0.039834	0.026242	0.027146	0.007422	0.0105	0.012775	0.022383	0.0378	0.038069	0.021985	0.034682	0.043011
L(5)			0.027027	0	0.001366	0.004817	0.001088	0.00492	0.009021	0.01236	0.02029	0.016539	0.020095	0.018257	0.018744	0.013206	0.012511	0.012777	0.016317	0.019597	0.020395	0.010401	0.020653	0.014451	0.021505
Q(677)			0	0	0.001366	0	0	0.00246	0.002577	0.010112	0.007246	0.005089	0.015366	0.017427	0.022962	0.026779	0.006785	0.010247	0.007083	0.010495	0.014629	0.009777	0.009993	0.00289	0.021505
R(246)			0	0	0	0	0	0	0.001289	0.001124	0	0.003817	0	0	0.000469	0	0.000212	0.000127	0.002024	0.003436	0.012387	0.039942	0.11992	0.202312	0.333333
A(845)			0	0	0	0	0	0.00246	0	0	0.002899	0.007634	0.003546	0.00249	0.00328	0.008804	0.015479	0.018343	0.012902	0.010681	0.009931	0.006865	0.007328	0.00578	0.010753
G(1167)			0	0	0	0	0	0	0	0.002247	0.008696	0.006361	0.01182	0.033195	0.038894	0.042553	0.022689	0.014548	0.005818	0.003808	0.00299	0.000624	0.001999	0	0
L(452)			0	0	0	0	0	0	0	0	0.002899	0	0.001182	0.006639	0.018276	0.007337	0.015691	0.014421	0.013408	0.006037	0.002456	0.005825	0.043971	0.118497	0.150538
T(95)			0	0	0.001366	0.013487	0	0	0.001289	0.004494	0.004348	0.005089	0.00591	0.004149	0.012652	0.004035	0.003817	0.005313	0.011004	0.011424	0.013454	0.008321	0.017322	0.028902	0.053763
E(661)			0	0	0	0	0	0	0	0	0	0	0	0	0.000937	0.004769	0.01145	0.011512	0.01657	0.012074	0.008115	0.005409	0.000666	0	0
Q(414)			0	0	0	0	0.009793	0.00123	0.012887	0.030337	0.017391	0.043257	0.044917	0.031535	0.013121	0.010638	0.013783	0.008855	0.001265	0.000279	0	0	0	0	0
M(153)			0	0	0	0	0.002176	0	0	0.002247	0.002899	0.01145	0.021277	0.024896	0.02671	0.02201	0.008058	0.004175	0.002277	0.001858	0.004058	0.003328	0.003997	0.011561	0.053763
A(701)			0	0	0	0	0	0.00246	0.001289	0.002247	0	0	0	0.00083	0.008435	0.000734	0.002969	0.002657	0.008981	0.009009	0.010358	0.003328	0.003997	0	0.010753
D(253)			0	0	0.001366	0	0	0	0.001289	0.001124	0.005797	0.005089	0.002364	0.00083	0.005623	0.000367	0.002332	0.003542	0.00936	0.008173	0.010144	0.002496	0.003997	0	0.010753
V(1228)			0	0	0	0	0	0.00123	0	0.002247	0.007246	0.002545	0.002364	0.004979	0.002812	0.005503	0.007209	0.008223	0.006577	0.005758	0.002883	0.003537	0.001332	0	0
G(142)			0	0	0	0	0	0	0.001289	0.001124	0	0.002545	0.003546	0.00249	0.001874	0.002201	0.010814	0.007843	0.006704	0.004551	0.002349	0.004577	0.006662	0.00578	0.053763
S(704)			0	0	0	0	0	0	0.001289	0.001124	0	0	0.001182	0.00083	0	0.001467	0.011026	0.009741	0.007589	0.005108	0.001815	0.001248	0.002665	0	0
G(75)			0	0	0	0	0	0.00369	0.003866	0.001124	0.001449	0	0	0	0.011246	0.002201	0.000848	0.008602	0.009866	0.004365	0.001922	0.002704	0.001999	0.017341	0.021505
T(778)			0	0	0	0	0.001088	0	0.006443	0.024719	0.014493	0.031807	0.029551	0.020747	0.009372	0.008804	0.010814	0.006199	0.000885	0.000464	0	0	0	0	0
V(687)			0	0	0	0	0	0.00123	0	0.005618	0	0	0	0	0	0	0.002332	0.000506	0.000759	0.00613	0.014095	0.005825	0.001999	0.00289	0
A(879)			0	0	0	0.001927	0	0.00123	0	0.001124	0	0	0.007092	0.008299	0.015464	0.015407	0.006785	0.006452	0.003036	0.002322	0.002242	0.00104	0	0.00289	0
R(346)			0	0	0	0	0	0.00123	0	0.001124	0	0	0.001182	0.004149	0.008903	0.008804	0.005513	0.007337	0.002403	0.00195	0.002883	0.005201	0.014657	0.014451	0
T(19)			0.027027	0	0	0	0.001088	0	0	0	0	0.001272	0.001182	0	0.004686	0.000734	0.000848	0.000759	0.000885	0.002229	0.004378	0.008737	0.04064	0.109827	0.150538
T(470)			0	0	0	0.000963	0	0	0.001289	0	0	0	0	0	0.000469	0.000367	0	0.000506	0.001771	0.005015	0.010464	0.010818	0.014657	0.00578	0
A(222)			0	0	0	0	0.001088	0	0	0.002247	0.005797	0.013995	0.018913	0.027386	0.019681	0.012106	0.004665	0.002024	0.003289	0.001486	0.002136	0.001248	0	0	0
Q(173)			0	0	0	0	0	0	0.001289	0	0	0	0	0	0	0.000734	0.011026	0.008982	0.006577	0.004737	0.001388	0.000624	0.000666	0	0.021505
S(689)			0	0	0	0.000963	0	0	0	0	0.004348	0.001272	0.015366	0.020747	0.024836	0.018342	0.007846	0.001012	0.000885	0.001115	0.001602	0.002496	0.00533	0.008671	0
N(164)			0	0	0	0.000963	0	0	0	0	0	0	0	0	0	0.000734	0.011026	0.008729	0.006704	0.004365	0.001602	0.000624	0.000666	0	0.021505
T(76)			0	0	0	0	0.001088	0.00123	0	0.001124	0.001449	0	0.001182	0	0.009841	0.001467	0.00106	0.005566	0.00683	0.003436	0.004164	0.004785	0.003331	0.014451	0.021505
C(1235)			0	0	0	0	0	0	0	0	0.001449	0.002545	0.001182	0.00249	0.00328	0.000367	0	0	0.000759	0.004365	0.010464	0.010818	0.014657	0.00578	0
A(1078)			0	0	0.001366	0.009634	0.001088	0.00615	0.001289	0.017978	0.014493	0.02799	0.008274	0.020747	0.008435	0.001467	0.001696	0.002404	0.002403	0.003715	0.002883	0.00104	0	0	0
G(1219)			0	0	0	0	0.001088	0.00246	0.002577	0.006742	0.005797	0.006361	0.003546	0.010788	0.00328	0.004035	0.005513	0.004554	0.006577	0.003065	0.002242	0.001248	0.001332	0.00289	0
D(950)			0	0	0	0	0	0	0	0	0	0	0	0	0	0.000734	0.000424	0.000633	0.000506	0.001207	0.003631	0.009361	0.047302	0.115607	0.139785
T(478)			0	0	0	0	0	0	0	0	0	0	0.00591	0.00083	0.004686	0.004769	0.001908	0.001645	0.001138	0.000372	0.001708	0.005409	0.04064	0.109827	0.172043
A(647)			0	0	0	0.000963	0	0	0	0	0	0	0.001182	0	0.000469	0.000367	0.00106	0.004301	0.006198	0.006687	0.003844	0.003537	0.002665	0	0
T(572)			0	0	0	0	0.001088	0.00123	0	0.001124	0.001449	0.002545	0.003546	0	0.000937	0.002935	0.003393	0.005313	0.005439	0.003622	0.002563	0.004369	0.007328	0.008671	0.010753
A(653)			0	0	0	0	0	0	0	0	0.001449	0.001272	0	0.00083	0.000469	0.000734	0.00106	0.004301	0.002783	0.003529	0.006407	0.004369	0.019987	0.00289	0
A(520)			0	0	0	0	0	0	0	0.002247	0	0.001272	0.003546	0.00166	0.004217	0.001467	0.003605	0.00291	0.003795	0.005108	0.006407	0.00208	0	0	0
I(720)			0	0	0	0	0	0	0	0.003371	0.002899	0	0	0	0	0.000367	0.01039	0.009108	0.005059	0.003622	0.000534	0.000624	0.000666	0	0
G(1085)			0	0	0	0	0	0	0	0	0.002899	0.001272	0	0.00083	0	0	0.000212	0.000633	0.003036	0.003994	0.005659	0.010193	0.016656	0.023121	0
A(262)			0	0	0	0	0.001088	0	0	0.001124	0.001449	0.001272	0.002364	0.00083	0.003749	0.002201	0.004665	0.006072	0.006198	0.002322	0.002242	0.00104	0.003997	0.00578	0.010753
L(179)			0	0	0	0	0	0	0	0	0.001449	0	0.003546	0.007469	0	0.001101	0.002545	0.002657	0.004933	0.005387	0.004164	0.001456	0.001332	0	0.021505
Q(613)			0	0	0	0	0.001088	0	0.002577	0.001124	0.001449	0	0	0.00166	0.001406	0.000734	0.001272	0.003163	0.002656	0.004365	0.005125	0.005409	0.002665	0.00289	0
A(688)			0	0	0	0.001927	0.004353	0.00123	0.003866	0.002247	0.001449	0.001272	0.003546	0.004149	0.00328	0.003302	0.002545	0.001139	0.003668	0.003436	0.003524	0.003953	0.003331	0	0
W(152)			0	0	0	0	0	0	0.001289	0.001124	0.001449	0.003817	0.004728	0.00332	0.007029	0.005503	0.004665	0.003036	0.003542	0.001858	0.002563	0.001248	0.003331	0.00289	0.053763
A(1020)			0	0	0.001366	0.000963	0	0.00123	0	0	0.001449	0.005089	0.001182	0.004149	0.00328	0.002201	0.001908	0.006199	0.005565	0.002415	0.001815	0.000624	0.001999	0	0
E(654)			0	0	0	0	0.001088	0.00861	0.010309	0.022472	0.013043	0.012723	0.014184	0.009129	0.00328	0.000734	0.00106	0.001265	0.000253	0.001115	0.002563	0.006033	0.003997	0.00289	0
T(859)			0.027027	0	0	0	0	0.00123	0	0.003371	0.005797	0.001272	0.004728	0.00083	0.011715	0.001101	0.000636	0.004428	0.005945	0.002043	0.001175	0.001872	0.001999	0.008671	0
T(284)			0	0	0	0	0.001088	0	0	0	0	0	0	0	0.000469	0.000367	0.000636	0	0.000253	0.001022	0.001068	0.009361	0.037308	0.078035	0.16129
S(12)			0	0	0.001366	0	0.001088	0.00123	0.005155	0.003371	0	0.002545	0.008274	0.00083	0.000469	0.001834	0.001908	0.002657	0.001012	0.002601	0.004912	0.005409	0.001332	0	0
A(27)			0	0	0	0.000963	0.001088	0	0.003866	0.001124	0.004348	0.006361	0.001182	0.005809	0.002343	0.001101	0.002545	0.001898	0.002277	0.002508	0.003737	0.005409	0.000666	0	0
V(1264)			0	0	0	0	0	0.00123	0.005155	0.004494	0	0.002545	0.009456	0.004149	0.005623	0.001467	0.001272	0.003036	0.001897	0.002415	0.002776	0.003328	0.004664	0.00289	0
H(49)			0	0	0.004098	0.000963	0.002176	0.00123	0.003866	0.001124	0.001449	0.007634	0.013002	0.009129	0.002812	0.003668	0.004665	0.003795	0.002403	0.000557	0.002029	0.000832	0.002665	0.00289	0
G(181)			0.027027	0	0	0.003854	0.001088	0.00492	0.005155	0.006742	0.010145	0.007634	0.003546	0.00083	0.000937	0.000734	0.001696	0.001645	0.001897	0.002508	0.003844	0.002496	0.002665	0.00289	0.032258
P(1162)			0	0	0.001366	0.000963	0.003264	0.00492	0.006443	0.014607	0.005797	0.005089	0.003546	0.00249	0.003749	0.001101	0.002969	0.001898	0.002403	0.002229	0.001281	0.00312	0.004664	0.00289	0
F(490)			0	0	0	0	0	0	0.001289	0.003371	0	0	0	0	0.010309	0.001467	0.000212	0.003542	0.005565	0.00195	0.001708	0.001248	0.003997	0.008671	0
E(583)			0	0	0	0	0.001088	0.00246	0.003866	0.002247	0.004348	0	0.001182	0.00083	0.001406	0.001101	0.003817	0.002404	0.002783	0.002322	0.002349	0.004785	0.003331	0	0
A(672)			0	0	0	0	0	0.00123	0.001289	0.003371	0.001449	0	0	0.00083	0.000937	0.003302	0.003393	0.005313	0.003921	0.00195	0.001922	0.000624	0	0	0
G(257)			0	0	0	0	0	0	0.001289	0	0.002899	0.002545	0.003546	0.00249	0.003749	0.003302	0.002757	0.003795	0.001897	0.00195	0.002029	0.002912	0.004664	0	0
L(216)			0	0	0	0	0	0	0	0.005618	0	0	0	0.00083	0	0.001467	0.002545	0.00253	0.00215	0.002136	0.00331	0.004993	0.001999	0	0.010753
L(176)			0	0	0	0.000963	0	0.00123	0.003866	0	0.004348	0.006361	0.00591	0.004149	0.003749	0.001467	0.004453	0.000886	0.00215	0.002043	0.001922	0.001248	0.006662	0.00578	0.021505
S(640)			0	0	0	0	0.001088	0.00123	0.002577	0.005618	0.004348	0.001272	0	0	0.000937	0	0.00106	0.001392	0.003415	0.003251	0.003203	0.002496	0.002665	0	0
S(477)			0	0	0	0	0.001088	0	0	0	0.005797	0.010178	0.004728	0.012448	0.008903	0.008804	0.001272	0.001012	0.002024	0.000743	0.001068	0.00208	0.001332	0	0.021505
D(936)			0	0	0.001366	0.000963	0.002176	0	0.002577	0.001124	0.002899	0.002545	0.001182	0.00249	0.004686	0.001834	0.002332	0.001771	0.00215	0.00195	0.001922	0.003953	0.001999	0.00578	0
D(427)			0	0	0	0.000963	0	0	0	0	0	0	0	0	0	0.000367	0.001272	0.00253	0.003542	0.003158	0.003631	0.001872	0.001332	0	0
A(67)			0	0	0	0	0.001088	0.00123	0.002577	0	0	0.001272	0.002364	0.00083	0.000469	0.000367	0.001272	0.004428	0.001897	0.003715	0.001815	0.000832	0.001332	0	0.021505
Y(144)			0	0	0	0	0	0	0	0	0	0	0	0	0	0	0.00106	0.000506	0.001897	0.002136	0.00331	0.004161	0.013991	0.017341	0.053763
R(78)			0	0	0	0	0	0.00123	0.001289	0.001124	0.001449	0.001272	0.003546	0.00166	0.004686	0.002568	0.001272	0.001139	0.001897	0.003901	0.002563	0.000624	0.000666	0	0.021505
D(215)			0	0	0	0.000963	0	0	0	0.002247	0.004348	0	0.003546	0.00249	0.001874	0.000367	0.002969	0.001898	0.002909	0.001579	0.00331	0.001872	0.000666	0.00289	0
A(626)			0	0	0	0	0.002176	0.00861	0.01933	0.02809	0.011594	0.016539	0.01182	0.007469	0.002343	0.001101	0.000424	0.000759	0.000506	0.000464	0.000747	0	0.001332	0	0
T(732)			0	0	0	0	0	0	0	0.002247	0	0	0.003546	0.00249	0.003749	0.004035	0.001908	0.004048	0.001012	0.001022	0.00267	0.001664	0	0.00289	0
S(254)			0	0	0	0	0.001088	0.00246	0.001289	0.001124	0.001449	0	0	0	0.001874	0.004035	0.001696	0.001645	0.002783	0.002136	0.00267	0.001456	0.001332	0	0
K(1191)			0	0	0	0.014451	0.002176	0.00123	0.001289	0	0	0	0.001182	0.00166	0.002343	0.002568	0.00106	0.002024	0.00215	0.001486	0.001495	0.002704	0.000666	0.00289	0
M(1237)			0	0	0	0.000963	0.003264	0	0	0.004494	0	0.003817	0	0.00166	0.001874	0.002201	0.000848	0.001265	0.002024	0.002229	0.001922	0.004161	0.000666	0	0
S(939)			0	0	0.001366	0.00289	0	0.00246	0.001289	0.001124	0.018841	0.006361	0.002364	0.006639	0.006092	0.000734	0.00106	0.001771	0.001518	0.001207	0.000854	0.001872	0.001332	0	0
Y(145)			0	0	0	0	0	0	0	0	0	0	0	0	0	0.000367	0.00106	0.00038	0.001897	0.001765	0.00267	0.00312	0.01066	0.017341	0.053763
V(1122)			0	0	0	0	0	0.00246	0	0.002247	0.001449	0.002545	0	0	0.000469	0.000367	0.001696	0.005693	0.000759	0.001765	0.001922	0.000832	0.000666	0	0
M(1229)			0	0	0.001366	0.000963	0.001088	0.00246	0.002577	0.002247	0	0.002545	0.00591	0.00249	0.001406	0.002201	0.002757	0.001139	0.001265	0.001393	0.002349	0.001456	0.000666	0.00289	0
E(1150)			0	0	0	0	0	0	0	0	0.002899	0.002545	0	0.004979	0	0	0.004453	0.002657	0.001771	0.001207	0.001815	0.00208	0	0	0
P(1263)			0	0	0.009563	0	0	0	0	0.002247	0	0.002545	0.002364	0.00249	0.001874	0.004402	0.001272	0.001645	0.002277	0.001393	0.001602	0.000624	0.000666	0	0
T(307)			0	0	0.001366	0.000963	0	0.00246	0.001289	0.010112	0.021739	0.035623	0	0.00249	0.001874	0.001101	0.00212	0.001012	0.000506	0.000186	0.000747	0.000416	0.000666	0	0
F(565)			0	0	0	0.00289	0	0.00123	0.002577	0.002247	0.008696	0.031807	0.004728	0.010788	0.008903	0.006603	0.000848	0.00038	0	0	0	0	0	0	0
P(251)			0	0	0	0.000963	0	0	0	0.001124	0	0	0	0	0	0.000734	0.000212	0.000253	0.000506	0.000836	0.002776	0.009361	0.00533	0	0
R(21)			0	0	0	0	0	0	0.001289	0	0.001449	0.002545	0.00591	0.00083	0.005623	0.001834	0.000424	0.000633	0.001518	0.001486	0.002136	0.001456	0.00533	0.00289	0
E(780)			0	0	0	0	0.001088	0.00123	0	0	0	0	0	0	0.001874	0	0.000848	0.000253	0.000632	0.002136	0.001708	0.004161	0.012658	0.00289	0
Q(23)			0	0	0	0	0	0	0.003866	0	0.004348	0.007634	0.01182	0.007469	0.009372	0.001101	0.000424	0	0.000253	0.000186	0.002883	0.001248	0	0.00289	0
A(684)			0	0	0.001366	0.000963	0.003264	0.00123	0.001289	0.001124	0.001449	0.001272	0	0.00083	0.001874	0.001467	0.002545	0.001139	0.001265	0.001672	0.001068	0.00208	0.003997	0	0
